# Supplementary material for: Water enables diastereodivergency in bispidine-based chiral amine-catalyzed asymmetric Mannich reaction of cyclic N-sulfonyl ketimines with ketones
Source: Royal Society of Chemistry journal article supplement (doi:10.1039/d2sc00446a), 2022-01-01
Supplement: d2sc00446a1.pdf [file d2sc00446a1.pdf]

## Electronic Supporting Information

### **Water Enables Diastereodivergency in Bispidine-Based Chiral Amine-Catalyzed Asymmetric Mannich Reaction of Cyclic *N*-Sulfonyl Ketimines with Ketones**

Gonglin Li, Yan Zhang, Hongkun Zeng, Xiaoming Feng, Zhishan Su\* and Lili Lin\*

---

## Table of Contents

|                                                                                          |     |
|------------------------------------------------------------------------------------------|-----|
| Table of Contents .....                                                                  | 2   |
| 1. General informations .....                                                            | 3   |
| 2. Typical procedure for chiral bispidines preparation .....                             | 3   |
| 3. General procedure for cyclic <i>N</i> -sulfonyl ketimines preparation .....           | 4   |
| 4. General procedure for preparation of the racemic products <b>3</b> and <b>4</b> ..... | 4   |
| 5. General procedure for the catalytic asymmetric Mannich reaction .....                 | 4   |
| 6. Optimization of the reaction conditions. ....                                         | 5   |
| 7. Control experiments .....                                                             | 8   |
| 8. Gram-scale synthesis of <b>3aa</b> and <b>4aa</b> .....                               | 9   |
| 9. Transformations of the product .....                                                  | 9   |
| 10. Other substrates. ....                                                               | 10  |
| 11. DFT Calculations .....                                                               | 11  |
| 12. Crystal data of catalyst and product. ....                                           | 49  |
| 13. Spectral characterization data for the products .....                                | 55  |
| 14. Copies of CD spectra for the products. ....                                          | 91  |
| 15. Copies of NMR spectra for the products .....                                         | 102 |
| 16. References .....                                                                     | 161 |

## 1. General informations

Unless otherwise noted, NMR characterization data were collected on Bruker ASCENDTM operating at 400 MHz or 600 MHz for  $^1\text{H}$  NMR, 100 MHz or 150 MHz for  $^{13}\text{C}\{^1\text{H}\}$  NMR (with complete proton decoupling), and 376 MHz or 565 MHz for  $^{19}\text{F}\{^1\text{H}\}$  NMR (with complete proton decoupling).  $^1\text{H}$  NMR chemical shifts were reported in ppm from tetramethylsilane with the solvent resonance as the internal standard ( $\text{CDCl}_3$ ,  $\delta = 7.26$ ).  $^{13}\text{C}$  NMR spectra chemical shifts are reported in ppm from the tetramethylsilane with the solvent resonance as internal standard ( $\text{CDCl}_3$ ,  $\delta = 77.0$ ). Spectra were reported as follows: chemical shift ( $\delta$ ppm), multiplicity (s = singlet, d = doublet, t = triplet, q = quartet, m = multiplet), coupling constants (Hz), integration and assignment. High-resolution mass spectra (HRMS) were recorded on a Thermo Q-Exactive Focus (FTMS+c ESI). Enantiomeric excesses were determined by chiral SFC analysis using the corresponding commercial chirapak column as stated in the experimental procedures at 23 °C with UV detector. Optical rotations were measured on Rudolph Research Analytic Automatic Polarimeter and reported as follows:  $[\alpha]_{\text{D}}^{\text{T}}$  (c: g/100 mL, in  $\text{CH}_2\text{Cl}_2$ ,  $\lambda = 589$  nm). Infrared spectra (IR) were recorded on Bruker Tensor II spectrometer with Plantium ATR accessory and the peaks are reported as absorption maxima ( $\nu$ ,  $\text{cm}^{-1}$ ). Circular dichroism spectrums (CD) were recorded on Applied Photophysics Chirascan. Melting point ranges were determined on OptiMelt. X-ray crystallographic data were collected by a Bruker D8 Venture Photon II. All the solvents were purified by usual methods before use and reagents obtained from commercial sources were used without further purification. Chiral bispidines,<sup>1</sup> cyclic *N*-sulfonyl ketimines<sup>2</sup> were synthesized according to reported literature procedures.

## 2. Typical procedure for chiral bispidines preparation.<sup>1</sup>

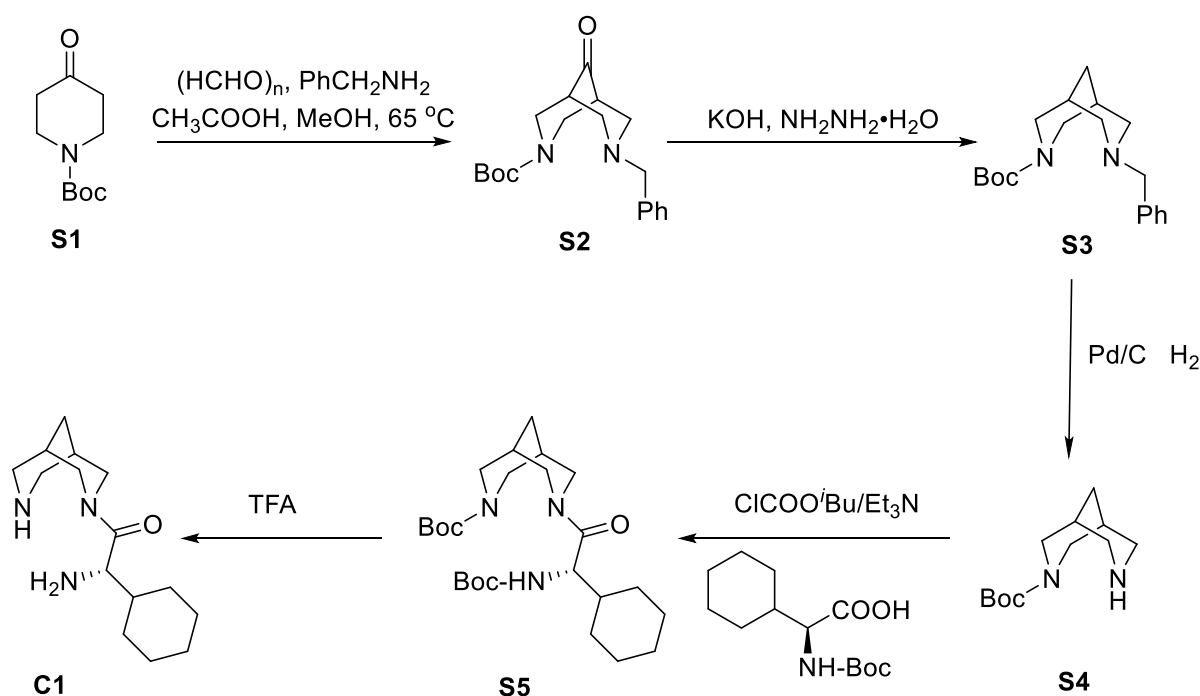

A solution of 1-Boc-piperidin-4-one **S1** (9.96 g, 50.0 mmol), benzylamine (5.36 g, 50.0 mmol) and acetic acid (3.0 mL) in dry methanol (20 mL) was added dropwise over a period of 1 h at  $65\text{ }^\circ\text{C}$  in an oil bath to a suspension of paraformaldehyde (3.03 g, 100.0 mmol) in dry methanol (40 mL). Another portion of paraformaldehyde (3.03 g, 100.0 mmol) was added and the mixture was stirred for 8 h at  $65\text{ }^\circ\text{C}$  in an oil bath. Then 1 *N*KOH solution (100 mL) was added in ice-water bath, the aqueous phase was extracted with  $\text{CH}_2\text{Cl}_2$  (3x200 mL). The combined organic layers were dried over  $\text{Na}_2\text{SO}_4$  and the solvent was evaporated in vacuo. and further purified by column chromatography on silica gel (petroleum ether/ethyl acetate = 3/1) to yield a yellow oil **S2** (10.03 g, 30.37 mmol, 61% yield).

To a mixture of **S2** (10.03 g, 30.37 mmol), hydrazine monohydrate (7.3 mL, 151.8 mmol) and diethylene glycol (60 mL) at  $60\text{ }^\circ\text{C}$  was added powdered KOH (11.77 g, 210.2 mmol) in an oil bath. The mixture was heated to  $160\text{ }^\circ\text{C}$  for 4 h in an oil bath. After cooling, the mixture was treated with water (200 mL) and extracted with  $\text{CH}_2\text{Cl}_2$  (3x200 mL). The combined organic layers were dried with  $\text{Na}_2\text{SO}_4$ . The organic solvent was evaporated in vacuo and the residue was purified by flash chromatography on silica gel (petroleum ether /ethyl acetate = 4/1) to yield a white solid **S3** (6.72 g, 21.2 mmol, 70% yield).

$\text{Pd/C}$  (0.51 g, 10%) was added to a suspension of bispidine **S3** (3.16 g, 10.0 mmol) in methanol (15 mL), then acetic acid (10 mL) was added. The atmosphere was exchanged with hydrogen for 3 times. The mixture was stirred under  $\text{H}_2$  atmosphere for 12 h. The mixture was filtered over celite and the solvent was alkalized by 1 *N* KOH solution (250 mL) and extracted with  $\text{CH}_2\text{Cl}_2$  (3x200 mL). The combined organic layers were dried with  $\text{Na}_2\text{SO}_4$ . The organic solvent was evaporated in vacuo and the crude product **S4** was obtained used directly in the next step without purification.

*N*-tert-Butoxycarbonyl-L-tert-leucine (2.66 g, 11.5 mmol) and TEA (1.60 mL, 11.5 mmol) were dissolved in THF (20 mL). The solution was cooled to  $0\text{ }^\circ\text{C}$  in ice-water bath. To the solution was added isobutyl chloroformate (1.49 mL, 11.5 mmol) dropwise for 15 min. After the solution was stirred for 30 min, amine **S4** obtained above was added for 15 min. The resulting solution was stirred at  $0\text{ }^\circ\text{C}$  for 1 h in ice-water bath and then at room temperature for another 16 h. After filtration and removal of solvent under reduced

pressure, the residue was purified through column chromatography on silica gel (petroleum ether/ethyl acetate = 3/1) to yield a white solid **S5** (2.94 g, 67% yield).

To **S5** (2.94 g, 6.7 mmol) in  $\text{CH}_2\text{Cl}_2$  (5 mL) was added TFA (13.4 mL) and stirred until the reaction was finished. Then the solvent was evaporated, and  $\text{CH}_2\text{Cl}_2$  (10 mL) was added. The pH value was brought into the range of 8–10 by the addition of 1 *N* NaOH. The aqueous phase was extracted with  $\text{CH}_2\text{Cl}_2$  (5×20 mL). The combined organic phase was washed with brine, dried over anhydrous  $\text{MgSO}_4$  and evaporated in vacuo to yield a yellow oil **C1** (1.42 g, 6.0 mmol, 89% yield).

### 3. General procedure for cyclic *N*-sulfonyl ketimines preparation.<sup>2</sup>

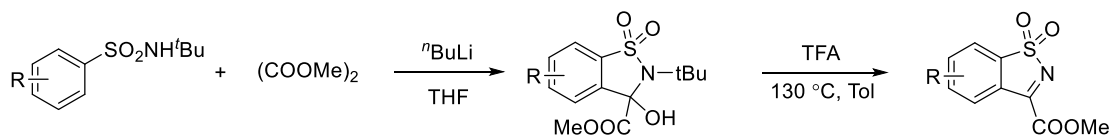

Under a dry nitrogen atmosphere, aryl sulfonamide (15 mmol) was dissolved in anhydrous THF (80 mL), and then the solution was cooled to 0 °C. To the solution was added butyllithium (30.75 mmol) dropwise for 20 min. After stirring an additional 25 min, the suspension was cooled further to -78 °C and dimethyl oxalate (45 mmol) in THF (20 mL) was added dropwise over 10 minutes. The cooling bath was removed and the suspension was stirred at ambient temperature for 2 h. The reaction was quenched with 5% HCl (40 mL) and added to water (200 mL). The organics were extracted with ether (50×3 mL). The ether phase was washed with brine (200 mL). The solvent was removed and the crude product was obtained used directly in the next step without further purification.

To the crude product obtained above, TFA (75 mol) in toluene (20 mL) was added and the resulting mixture was stirred at 130 °C in sealed tube for 10 to 60 minutes, then the solution was concentrated and the resultant solid was dissolved in  $\text{CH}_2\text{Cl}_2$  (150 mL) and washed with  $\text{NaHCO}_3$  saturated solution (50×2 mL) to remove traces of TFA. Then the organic phase was washed with brine and dried over  $\text{Na}_2\text{SO}_4$ . The solvent was removed and the obtained crude product was further purified by flash chromatography (DCM/PE = 1/2).

### 4. General procedure for preparation of the racemic products 3 and 4.

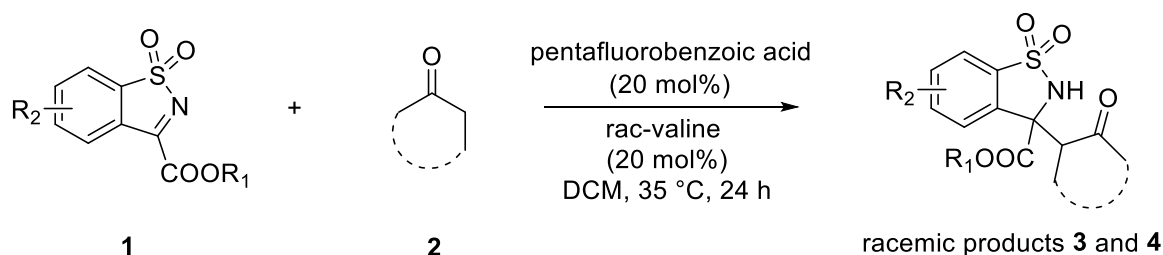

A dry reaction tube was charged with cyclic *N*-sulfonyl ketimines **1** (0.20 mmol), ketones **2** (liquid ketone 0.2 mL, solid ketone 1.0 mmol), rac-valine (4.7 mg, 0.04 mmol, 20 mol%), pentafluorobenzoic acid (8.5 mg, 0.04 mmol, 20 mol%) in anhydrous DCM (0.6 mL). The reaction mixture was stirred at 35 °C for 24 h in water bath. The desired product was purified directly by silica gel column chromatography (petroleum ether/ethyl acetate = 2/1) to yield a white solid.

### 5. General procedure for the catalytic asymmetric Mannich reaction.

**Anti-selective Mannich reaction:**

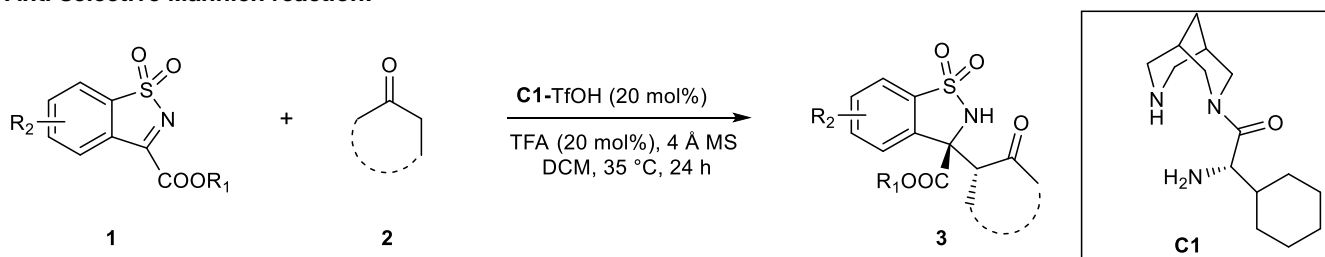

A dry reaction tube was charged with cyclic *N*-sulfonyl ketimines **1** (0.20 mmol), ketones **2** (liquid ketone 0.2 mL, solid ketone 1.0 mmol), **C1-TfOH** (16.6 mg, 0.04 mmol, 20 mol%), TFA (4.6 mg, 0.04 mmol, 20 mol%), and 4 Å MS (20 mg) in anhydrous DCM (0.6 mL). The reaction mixture was stirred at 35 °C for 24 h in water bath. The desired product was purified directly by silica gel column chromatography (petroleum ether/ethyl acetate = 2/1) to yield a white solid.

**Syn-selective Mannich reaction:**

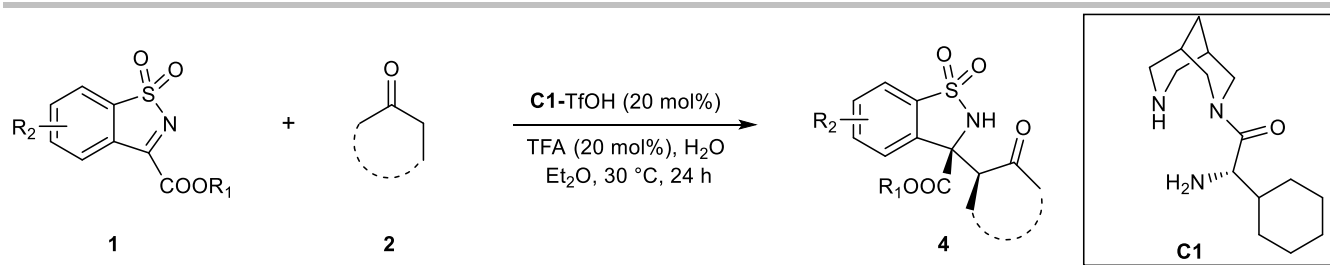

A dry reaction tube was charged with cyclic *N*-sulfonyl ketimines **1** (0.20 mmol), ketones **2** (liquid ketone 0.2 mL, solid ketone 1.0 mmol), **C1-TfOH** (16.6 mg, 0.04 mmol, 20 mol%), TFA (4.6 mg, 0.04 mmol, 20 mol%), and H<sub>2</sub>O (0.2 mL) in anhydrous Et<sub>2</sub>O (0.6 mL). The reaction mixture was stirred at 30 °C for 24 h in water bath. The desired product was purified directly by silica gel column chromatography (petroleum ether/ethyl acetate = 2/1) to yield a white solid.

## 6. Optimization of the reaction conditions.

**Table S1:** Screening of catalysts.

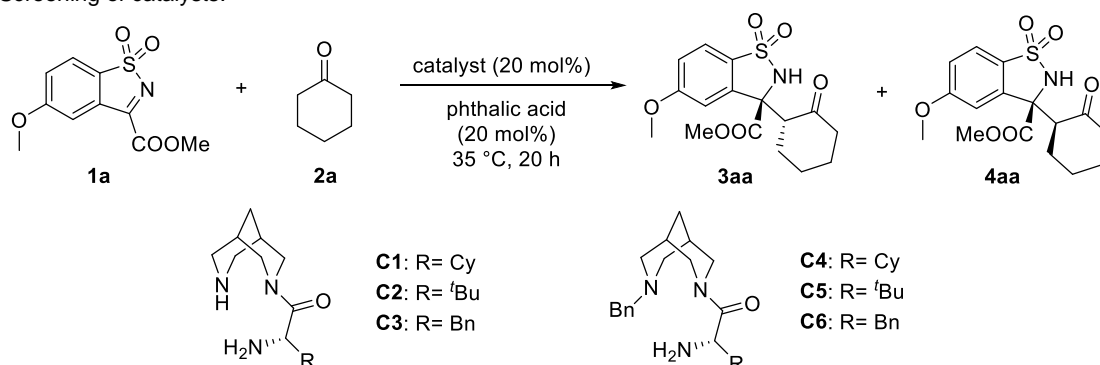

| Entry <sup>a</sup> | Catalyst  | Yield (%) <sup>b</sup> | dr ( <b>3aa:4aa</b> ) <sup>c</sup> | ee (%) <sup>c</sup> |
|--------------------|-----------|------------------------|------------------------------------|---------------------|
| 1                  | <b>C1</b> | 99                     | 76:24                              | 67/0                |
| 2                  | <b>C2</b> | 98                     | 62:28                              | 62/-34              |
| 3                  | <b>C3</b> | 98                     | 60:40                              | 60/20               |
| 4                  | <b>C4</b> | 98                     | 62:38                              | 33/58               |
| 5                  | <b>C5</b> | 99                     | 65:35                              | 5/60                |
| 6                  | <b>C6</b> | 99                     | 60:40                              | 55/20               |

<sup>a</sup> Unless otherwise noted, catalyst (0.04 mmol, 20 mol%), phthalic acid (0.04 mmol, 20 mol%), **1a** (51.0 mg, 0.20 mmol) and **2a** (0.6 mL) were stirred at 35 °C for 20 h in water bath. The mixture was purified directly by column chromatography on silica gel. <sup>b</sup> Isolated yield. <sup>c</sup> Determined by SFC analysis on a chiral stationary.

**Table S2:** Screening of acids with **C1** as catalyst.

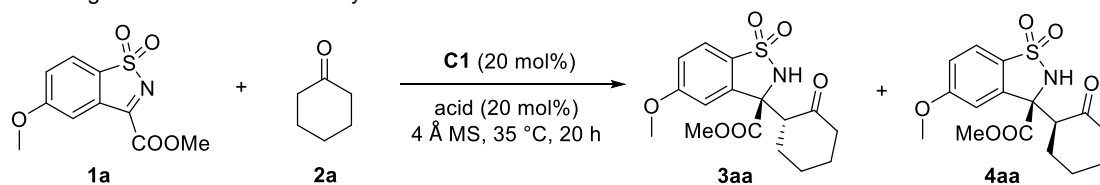

| Entry <sup>a</sup> | Acid                          | Yield (%) <sup>b</sup> | dr ( <b>3aa:4aa</b> ) <sup>c</sup> | ee (%) <sup>c</sup> |
|--------------------|-------------------------------|------------------------|------------------------------------|---------------------|
| 1                  | benzoic acid                  | 78                     | >19:1                              | 31                  |
| 2                  | salicylic acid                | 97                     | >19:1                              | 40                  |
| 3                  | phthalic acid                 | 95                     | >19:1                              | 44                  |
| 4                  | pentafluorobenzoic acid       | 92                     | >19:1                              | 50                  |
| 5                  | trifluoroacetic acid          | 93                     | >19:1                              | 72                  |
| 6                  | trifluoromethanesulfonic acid | 95                     | 85:15                              | 80                  |

<sup>a</sup> Unless otherwise noted, **C1** (0.04 mmol, 20 mol%), acid (0.04 mmol, 20 mol%), **1a** (51.0 mg, 0.20 mmol), **2a** (0.6 mL) and 4 Å MS (20.0 mg) were stirred at 35 °C for 20 h in water bath. The mixture was purified directly by column chromatography on silica gel. <sup>b</sup> Isolated yield. <sup>c</sup> Determined by SFC analysis on a chiral stationary.

**Table S3:** Screening of additives with **C1** as catalyst.

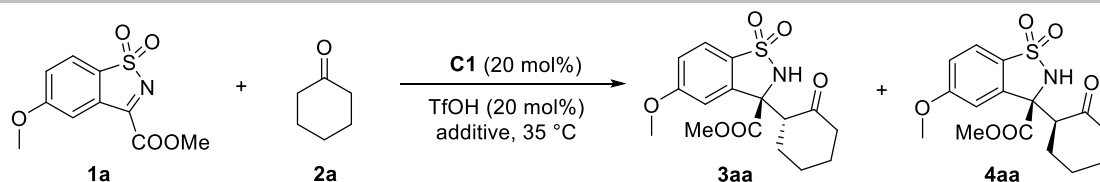

| Entry <sup>a</sup> | Additive                  | Time (h) | Yield (%) <sup>b</sup> | dr (3aa:4aa) <sup>c</sup> | ee (%) <sup>c</sup> |
|--------------------|---------------------------|----------|------------------------|---------------------------|---------------------|
| 1                  | H <sub>2</sub> O (0.2 mL) | 36 h     | 78                     | 20:80                     | 67/69               |
| 2                  | 4 Å MS (20.0 mg)          | 16 h     | 95                     | 76:24                     | 80/10               |
| 3                  | 4 Å MS (40.0 mg)          | 36 h     | 50                     | 87:13                     | 45/23               |
| 4                  | 4 Å MS (60.0 mg)          | 36 h     | 46                     | 91:9                      | 30/11               |

<sup>a</sup> Unless otherwise noted, **C1** (0.04 mmol, 20 mol%), TfOH (0.04 mmol, 20 mol%), **1a** (51.0 mg, 0.20 mmol), additive and **2a** (0.6 mL) were stirred at 35 °C in water bath. The mixture was purified directly by column chromatography on silica gel. <sup>b</sup> Isolated yield. <sup>c</sup> Determined by SFC analysis on a chiral stationary.

**Table S4:** Screening of acids with **C1-TfOH** as catalyst.

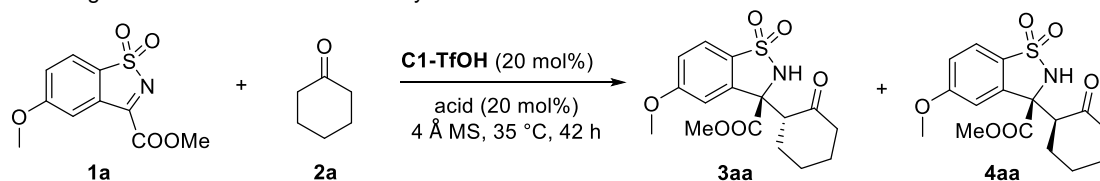

| Entry <sup>a</sup> | Acid                        | Yield (%) <sup>b</sup> | dr (3aa:4aa) <sup>c</sup> | ee (%) <sup>c</sup> |
|--------------------|-----------------------------|------------------------|---------------------------|---------------------|
| 1                  | -                           | 80                     | 88:12                     | 68                  |
| 2                  | benzoic acid                | 80                     | 89:11                     | 64                  |
| 3                  | acetic acid                 | 97                     | 88:12                     | 71                  |
| 4                  | salicylic acid              | 89                     | 93:7                      | 73                  |
| 5                  | <i>ortho</i> -phthalic acid | 98                     | 91:9                      | 71                  |
| 6 <sup>d</sup>     | pentafluorobenzoic acid     | 95                     | 95:5                      | 80                  |
| 7 <sup>d</sup>     | trifluoroacetic acid        | 99                     | >19:1                     | 83                  |

<sup>a</sup> Unless otherwise noted, **C1-TfOH** (0.04 mmol, 20 mol%), acid (0.04 mmol, 20 mol%), **1a** (51.0 mg, 0.20 mmol), **2a** (0.6 mL) and 4 Å MS (20.0 mg) were stirred at 35 °C for 42 h in water bath. The mixture was purified directly by column chromatography on silica gel. <sup>b</sup> Isolated yield. <sup>c</sup> Determined by SFC analysis on a chiral stationary. <sup>d</sup> For 20 h.

**Table S5:** Screening of solvents for *anti*-selective Mannich reaction.

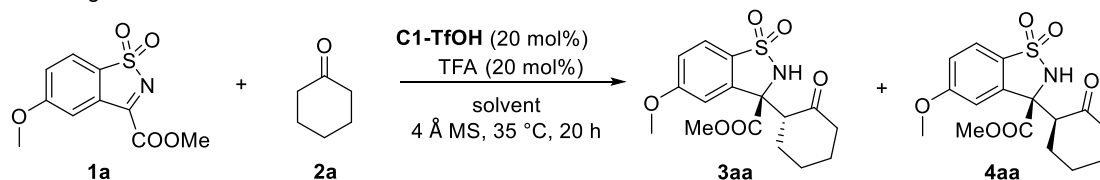

| Entry <sup>a</sup> | Solvent           | Yield (%) <sup>b</sup> | dr (3aa:4aa) <sup>c</sup> | ee (%) <sup>c</sup> |
|--------------------|-------------------|------------------------|---------------------------|---------------------|
| 1                  | Toluene           | 97                     | >19:1                     | 85                  |
| 2                  | Et <sub>2</sub> O | 91                     | >19:1                     | 83                  |
| 3                  | DCM               | 98                     | >19:1                     | 92                  |
| 4                  | DCE               | 98                     | >19:1                     | 89                  |
| 5                  | EtOAc             | 95                     | >19:1                     | 86                  |
| 6                  | THF               | 90                     | >19:1                     | 82                  |
| 7                  | CHCl <sub>3</sub> | 97                     | >19:1                     | 88                  |
| 8                  | 1,4-Dioxane       | 98                     | >19:1                     | 83                  |
| 9                  | MeOH              | 85                     | 62:38                     | 85/75               |

<sup>a</sup> Unless otherwise noted, **C1-TfOH** (0.04 mmol, 20 mol%), TFA (0.04 mmol, 20 mol%), **1a** (51.0 mg, 0.20 mmol), **2a** (0.2 mL) and 4 Å MS (20.0 mg) were stirred in 0.6 mL solvent at 35 °C for 20 h in water bath. The mixture was purified directly by column chromatography on silica gel. <sup>b</sup> Isolated yield. <sup>c</sup> Determined by SFC analysis on a chiral stationary.

**Table S6:** Optimization of temperature for *anti*-selective Mannich reaction.

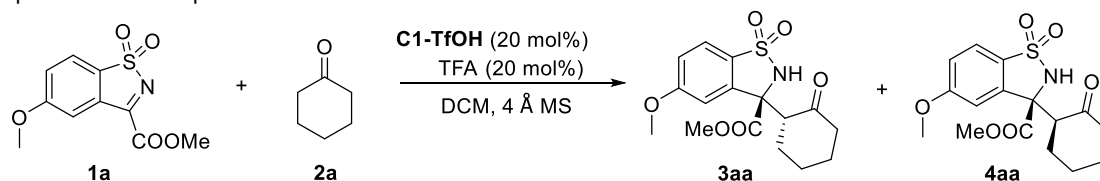

| Entry <sup>a</sup> | Temp (°C) | Time (h) | Yield (%) <sup>b</sup> | dr (3aa:4aa) <sup>c</sup> | ee (%) <sup>c</sup> |
|--------------------|-----------|----------|------------------------|---------------------------|---------------------|
| 1                  | 0         | 48 h     | 20                     | >19:1                     | 93                  |
| 2                  | 10        | 48 h     | 25                     | >19:1                     | 92                  |
| 3                  | 20        | 48 h     | 92                     | >19:1                     | 92                  |

|   |    |      |    |       |    |
|---|----|------|----|-------|----|
| 4 | 30 | 20 h | 94 | >19:1 | 92 |
| 5 | 35 | 20 h | 98 | >19:1 | 92 |
| 6 | 40 | 16 h | 97 | >19:1 | 90 |

<sup>a</sup> Unless otherwise noted, **C1-TfOH** (0.04 mmol, 20 mol%), TFA (0.04 mmol, 20 mol%), **1a** (51.0 mg, 0.20 mmol), **2a** (0.2 mL) and 4 Å MS (20.0 mg) were stirred in 0.6 mL DCM in water bath. The mixture was purified directly by column chromatography on silica gel. <sup>b</sup> Isolated yield. <sup>c</sup> Determined by SFC analysis on a chiral stationary.

**Table S7:** Screening of solvents for *syn*-selective Mannich reaction.

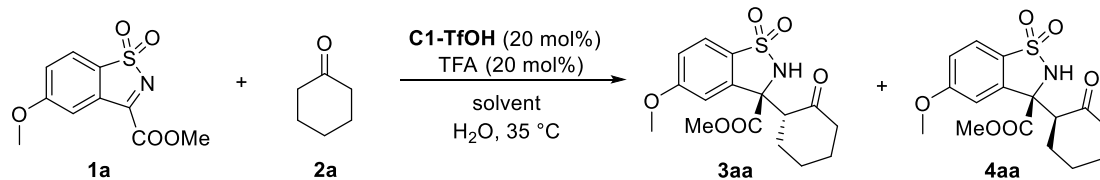

| Entry <sup>a</sup> | Solvent            | Time (h) | Yield (%) <sup>b</sup> | dr ( <b>3aa:4aa</b> ) <sup>c</sup> | ee (%) <sup>c</sup> |
|--------------------|--------------------|----------|------------------------|------------------------------------|---------------------|
| 1                  | Toluene            | 12 h     | 98                     | 23:77                              | 96/96               |
| 2                  | Et <sub>2</sub> O  | 12 h     | 98                     | 12:88                              | 90/93               |
| 3                  | DCM                | 12 h     | 99                     | 21:79                              | 94/93               |
| 4                  | DCE                | 12 h     | 97                     | 22:78                              | 94/94               |
| 5                  | EtOAc              | 12 h     | 98                     | 15:85                              | 85/90               |
| 6                  | THF                | 36 h     | 92                     | 11:89                              | 75/88               |
| 7                  | CH <sub>3</sub> CN | 36 h     | 80                     | 20:80                              | 76/80               |
| 8                  | 1,4-Dioxane        | 36 h     | 88                     | 15:85                              | 77/88               |
| 9                  | MTBE               | 12 h     | 98                     | 12:88                              | 85/92               |

<sup>a</sup> Unless otherwise noted, **C1-TfOH** (0.04 mmol, 20 mol%), TFA (0.04 mmol, 20 mol%), **1a** (51.0 mg, 0.20 mmol), **2a** (0.2 mL) and H<sub>2</sub>O (0.2 mL) were stirred in 0.6 mL solvent at 35 °C in water bath. The mixture was purified directly by column chromatography on silica gel. <sup>b</sup> Isolated yield. <sup>c</sup> Determined by SFC analysis on a chiral stationary.

**Table S8:** Optimization of amount of H<sub>2</sub>O for *syn*-selective Mannich reaction.

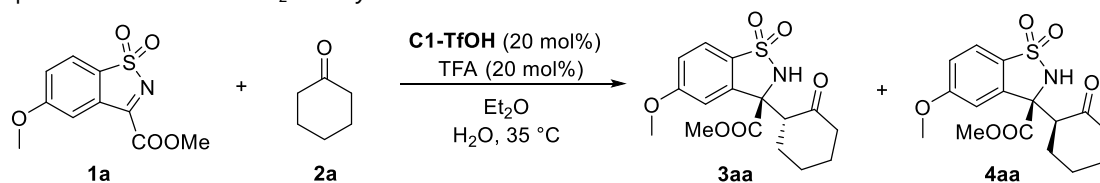

| Entry <sup>a</sup> | H <sub>2</sub> O | Time (h) | Yield (%) <sup>b</sup> | dr ( <b>3aa:4aa</b> ) <sup>c</sup> | ee (%) <sup>c</sup> |
|--------------------|------------------|----------|------------------------|------------------------------------|---------------------|
| 1                  | 3.6 μL           | 12 h     | 98                     | 31:69                              | 95/94               |
| 2                  | 10 μL            | 12 h     | 98                     | 18:82                              | 92/94               |
| 3                  | 50 μL            | 12 h     | 98                     | 14:86                              | 84/91               |
| 4                  | 0.1 mL           | 12 h     | 98                     | 13:87                              | 85/92               |
| 5                  | 0.2 mL           | 12 h     | 98                     | 12:88                              | 90/93               |
| 6                  | 0.4 mL           | 16 h     | 98                     | 12:88                              | 88/92               |
| 7 <sup>d</sup>     | 0.6 mL           | 16 h     | 98                     | 11:89                              | 77/88               |

<sup>a</sup> Unless otherwise noted, **C1-TfOH** (0.04 mmol, 20 mol%), TFA (0.04 mmol, 20 mol%), **1a** (51.0 mg, 0.20 mmol), **2a** (0.2 mL) and H<sub>2</sub>O were stirred in 0.6 mL Et<sub>2</sub>O at 35 °C in water bath. The mixture was purified directly by column chromatography on silica gel. <sup>b</sup> Isolated yield. <sup>c</sup> Determined by SFC analysis on a chiral stationary. <sup>d</sup> 0.6 mL H<sub>2</sub>O as solvent.

**Table S9:** Optimization of temperature for *syn*-selective Mannich reaction.

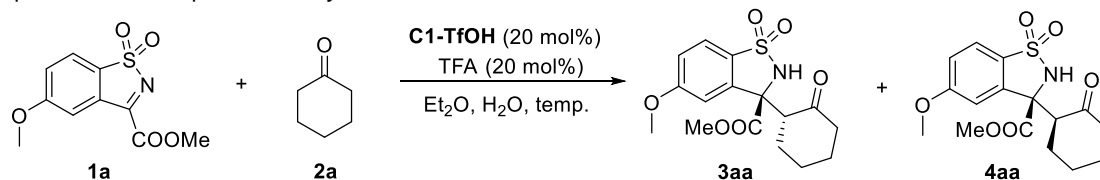

| Entry <sup>a</sup> | Temp (°C) | Time (h) | Yield (%) <sup>b</sup> | dr ( <b>3aa:4aa</b> ) <sup>c</sup> | ee (%) <sup>c</sup> |
|--------------------|-----------|----------|------------------------|------------------------------------|---------------------|
| 1                  | 0         | 72 h     | 17                     | 10:90                              | 80/93               |
| 2                  | 10        | 72 h     | 46                     | 9:91                               | 86/94               |
| 3                  | 20        | 40 h     | 95                     | 10:90                              | 89/93               |
| 4                  | 30        | 24 h     | 98                     | 10:90 (11:89) <sup>d</sup>         | 90/94               |
| 5                  | 35        | 16 h     | 98                     | 12:88 (14:86) <sup>d</sup>         | 90/93               |

<sup>a</sup> Unless otherwise noted, **C1-TfOH** (0.04 mmol, 20 mol%), TFA (0.04 mmol, 20 mol%), **1a** (51.0 mg, 0.20 mmol), **2a** (0.2 mL) and H<sub>2</sub>O (0.2 mL) were stirred in 0.6 mL Et<sub>2</sub>O in water bath. The mixture was purified directly by column chromatography on silica gel. <sup>b</sup> Isolated yield. <sup>c</sup> Determined by SFC analysis on a chiral stationary. <sup>d</sup> Determined by NMR analysis.

## 7. Control experiments.

(a)

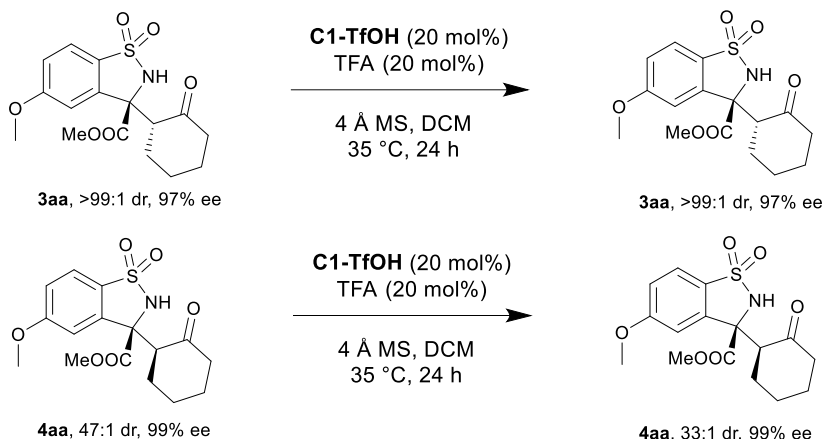

(b)

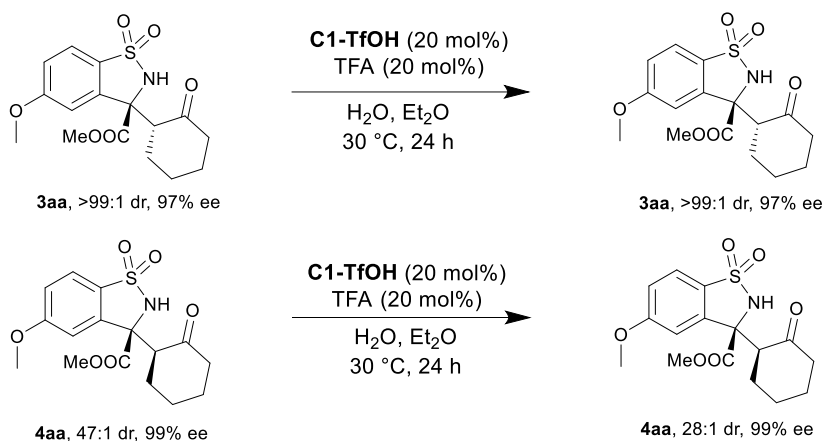

Control experiments in condition A: A dry reaction flask was charged with **3aa** or **4aa** (0.2 mmol), **C1-TfOH** (0.04 mmol, 20 mol%), TFA (0.04 mmol, 20 mol%) and 4 Å MS (20 mg) in anhydrous DCM (0.6 mL). The reaction mixture was stirred at 35 °C for 24 h in water bath. The desired product was purified directly by silica gel column chromatography (petroleum ether/ethyl acetate = 2/1) to yield a white solid.

Control experiments in condition B: A dry reaction flask was charged with **3aa** or **4aa** (0.2 mmol), **C1-TfOH** (0.04 mmol, 20 mol%), TFA (0.04 mmol, 20 mol%) and H<sub>2</sub>O (0.2 mL) in anhydrous Et<sub>2</sub>O (0.6 mL). The reaction mixture was stirred at 30 °C for 24 h in water bath. The desired product was purified directly by silica gel column chromatography (petroleum ether/ethyl acetate = 2/1) to yield a white solid.



## 8. Gram-scale synthesis of 3aa and 4aa.

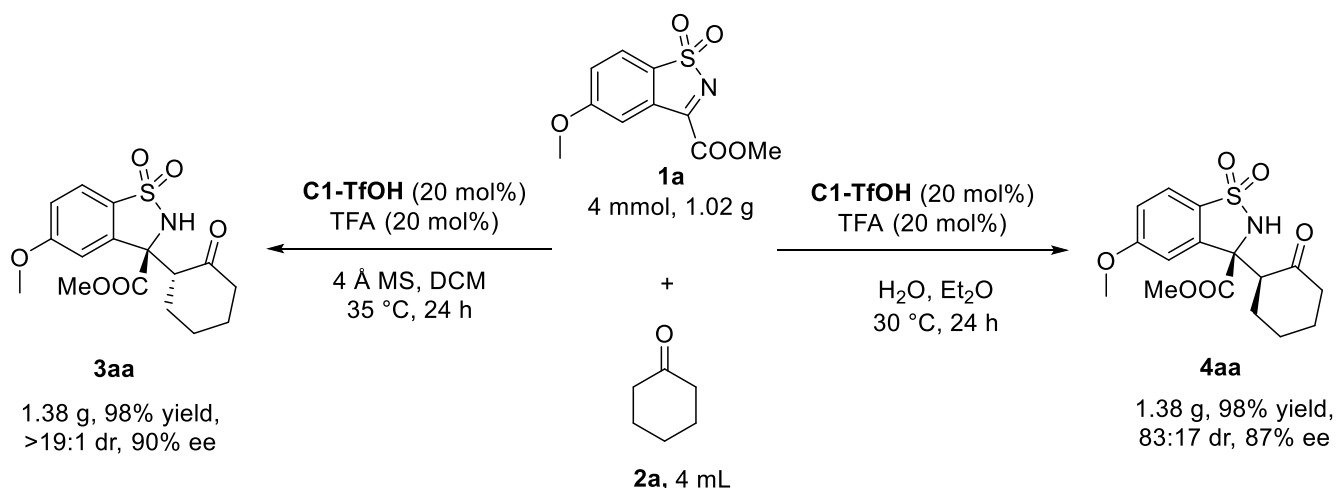

Gram-scale synthesis of **3aa**: A dry reaction flask was charged with cyclic *N*-sulfonyl ketimine **1a** (4.0 mmol, 1.02 g), cyclohexanone **2a** (4.0 mL), **C1-TfOH** (0.8 mmol, 20 mol%), TFA (0.8 mmol, 20 mol%) and 4 Å MS (400 mg) in anhydrous DCM (12.0 mL). The reaction mixture was stirred at 35 °C for 24 h in water bath. The desired product was purified directly by silica gel column chromatography (petroleum ether/ethyl acetate = 2/1) to yield a white solid.

Gram-scale synthesis of **4aa**: A dry reaction flask was charged with cyclic *N*-sulfonyl ketimine **1a** (4.0 mmol, 1.02 g), cyclohexanone **2a** (4.0 mL), **C1-TfOH** (0.8 mmol, 20 mol%), TFA (0.8 mmol, 20 mol%) and H<sub>2</sub>O (4.0 mL) in anhydrous Et<sub>2</sub>O (12.0 mL). The reaction mixture was stirred at 30 °C for 24 h in water bath. The desired product was purified directly by silica gel column chromatography (petroleum ether/ethyl acetate = 2/1) to yield a white solid.

## 9. Transformations of the product.

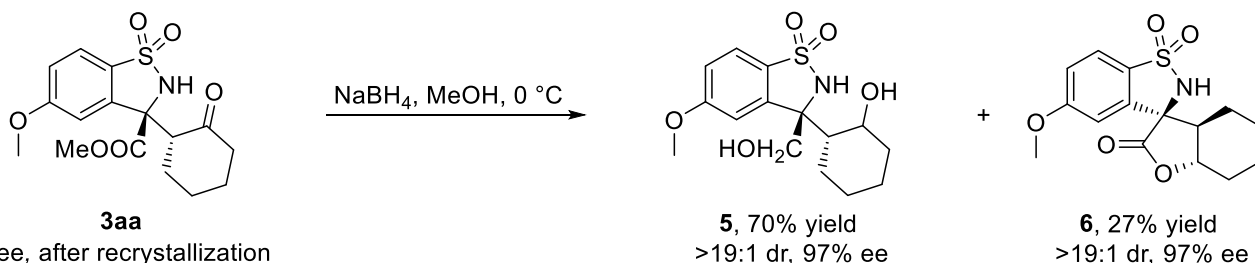

Synthesis of **5 and 6**: To a solution of **3aa** (0.10 mmol, 35.3 mg) in MeOH (1.5 mL) was added NaBH<sub>4</sub> (19.9 mg, 0.50 mmol), the solution was stirred at 0 °C for 3 h. After the reaction was completed, 1.0 mL water was added. Then, the mixture was extracted by EtOAc, and the aqueous layer was washed with EtOAc (2 x 2.0 mL). The combined organic phases were washed with brine (5.0 mL) and dried over Na<sub>2</sub>SO<sub>4</sub>. After evaporation of the solvent, the residue was subjected to column chromatography on silica gel with PE/EA = 3:1. The product **5** was obtained in 70% yield with >19:1 dr and 97% ee. The spirocyclic product **6** was also obtained in 27% yield with >19:1 dr and 97% ee.

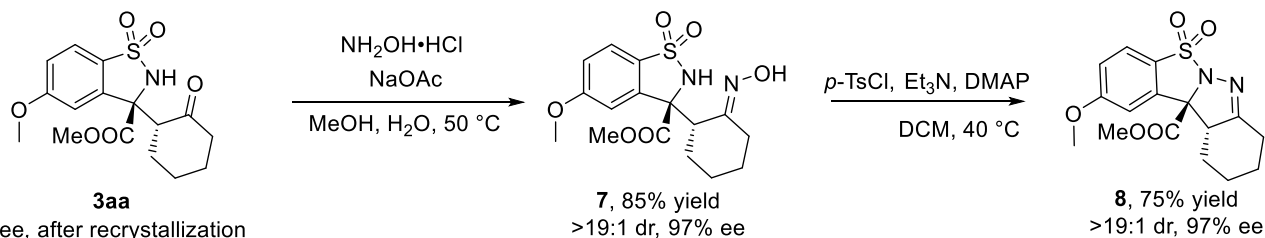

Synthesis of **7**: To a solution of **3aa** (0.10 mmol, 35.3 mg) in MeOH/H<sub>2</sub>O (1:1, 1.0 mL) was added NH<sub>2</sub>OH·HCl (0.30 mmol, 20.8 mg) and NaOAc (0.30 mmol, 24.6 mg), the solution was stirred at 50 °C for 36 h in water bath. After the reaction was completed, the mixture was extracted by EtOAc, and the aqueous layer was washed with EtOAc (2 x 2.0 mL). The combined organic phases were washed with brine (5.0 mL) and dried over Na<sub>2</sub>SO<sub>4</sub>. After evaporation of the solvent, the residue was subjected to column chromatography on silica gel with PE/EA = 3:1. The product **7** was obtained in 85% yield with >19:1 dr and 97% ee.

Synthesis of **8**: To a solution of **7** (0.10 mmol, 36.8 mg) in DCM (1.0 mL) was added *p*-TsCl (0.30 mmol, 57.2 mg), Et<sub>3</sub>N (0.3 mmol) and Dmap (0.02 mmol, 2.4 mg), the solution was stirred at 40 °C for 3 h in water bath. After the reaction was completed, 1.0 mL water was added. Then, the mixture was extracted by EtOAc, and the aqueous layer was washed with EtOAc (2 x 2.0 mL). The combined organic

phases were washed with brine (5.0 mL) and dried over Na<sub>2</sub>SO<sub>4</sub>. After evaporation of the solvent, the residue was subjected to column chromatography on silica gel with PE/EA = 3:1. The product **8** was obtained in 75% yield with >19:1 dr and 97% ee.

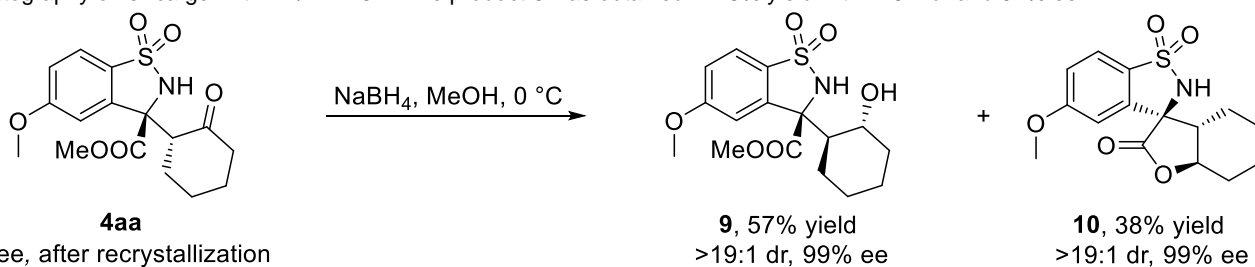

Synthesis of **9 and 10**: To a solution of **4aa** (0.10 mmol, 35.3 mg) in MeOH (1.5 mL) was added NaBH<sub>4</sub> (19.9 mg, 0.50 mmol), the solution was stirred at 0 °C for 3 h. After the reaction was completed, 1.0 mL water was added. Then, the mixture was extract by EtOAc, and the aqueous layer was washed with EtOAc (2 x 2.0 mL). The combined organic phases were washed with brine (5.0 mL) and dried over Na<sub>2</sub>SO<sub>4</sub>. After evaporation of the solvent, the residue was subjected to column chromatography on silica gel with PE/EA = 3:1. The product **9** was obtained in 57% yield with >19:1 dr and 97% ee. The spirocyclic product **10** was also obtained in 35% yield with >19:1 dr and 97% ee.

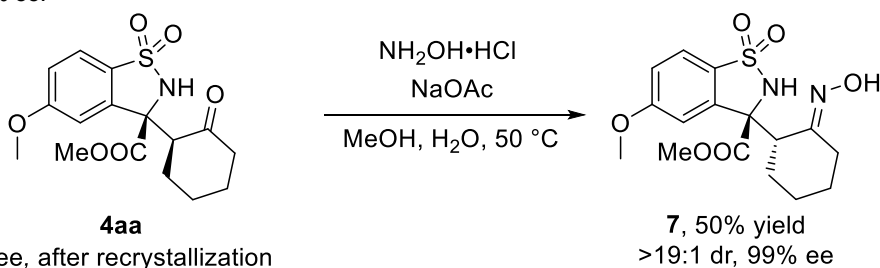

Synthesis of **7**: To a solution of **4aa** (0.10 mmol, 35.3 mg) in MeOH/H<sub>2</sub>O (1:1, 1.0 mL) was added NH<sub>2</sub>OH·HCl (0.30 mmol, 20.8 mg) and NaOAc (0.30 mmol, 24.6 mg), the solution was stirred at 50 °C for 36 h in water bath. After the reaction was completed, the mixture was extract by EtOAc, and the aqueous layer was washed with EtOAc (2 x 2.0 mL). The combined organic phases were washed with brine (5.0 mL) and dried over Na<sub>2</sub>SO<sub>4</sub>. After evaporation of the solvent, the residue was subjected to column chromatography on silica gel with PE/EA = 3:1. The product **7** was obtained in 50% yield with >19:1 dr and 99% ee.

## 10. Other substrates.

Other substrates in condition without additional water:

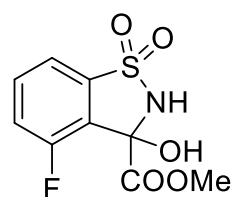

24 h, 97% yield  
78:22 dr, 90% ee

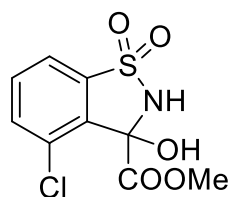

36 h, 46% yield  
71:29 dr, 90% ee

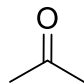

95% yield  
40% ee

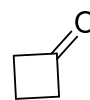

90% yield  
2.5:1 dr, 30/7% ee

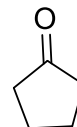

96% yield  
6:1 dr, 17/63% ee

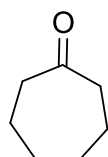

trace

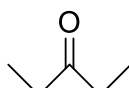

trace

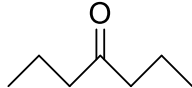

trace

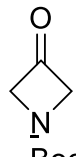

trace

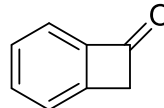

trace

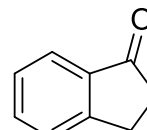

trace

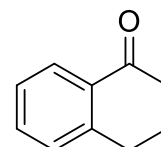

trace

Other substrates in condition with additional water:

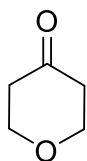

**3ab**, 88% yield  
*anti:syn* = 6:1  
77% ee

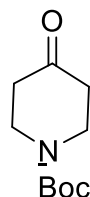

**3ac**, 95% yield  
*anti:syn* = 2.5:1  
94% ee

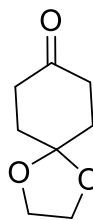

**3af**, 75% yield  
*anti:syn* = 2.5:1  
30% ee

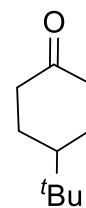

**3ah**, 75% yield  
*anti:syn* = 3.7:1  
90% ee

## 11. DFT Calculations

### 11.1 Computational methods

All structures in this work were optimized in dichloromethane solvent and characterized by frequency analysis at 308 K, using Gaussian 09 program package<sup>3</sup> and dispersion-included<sup>4,5</sup> M062X-D3 density functional with the 6-31G(d,p) basis set. The self-consistent reaction field (SCRF) and SMD<sup>6</sup> solvation model was adopted to evaluate the effect of solvent. To obtain more accurate energy, single-point calculations were run at the M062X-D3/def2-TZVP(SMD, dichloromethane) theoretical level. Unless specified, the Gibbs free energies obtained at the M062X-D3/def2-TZVP (SMD, dichloromethane)/M062X-D3 /6-31G(d,p) (SMD, dichloromethane) level at 308K are used in the discussion. The conformation search for key intermediates and products were performed using Grimme's XTBB code<sup>7</sup> in combination with Molclus software (Version 1.9.9.4)<sup>8</sup>

### 11.2 Computational results and discussion

As shown in Scheme S1, Scheme S2 and Figure S1, the catalytic reaction occurred *via* three continuous steps, including C-C bond formation, hydrolysis of imine and H-transfer.

When the *Si* or *Re*-face of **1** interacted with the enamine species generated by condensation between the primary amine of catalyst and cyclohexanone, two intermediates (**4-IM1** and **3-IM1**) were formed, alternatively. **3-IM1** was stable than **4-IM1** by 0.8 kcal mol<sup>-1</sup>. Then, the C-C bonds were constructed *via* transition state **3-TS1** and **4-TS1**, forming **3-IM2** and **4-IM2** respectively. For **3-TS1**, the NH<sub>2</sub> group of catalyst simultaneously interacted with N atom and O atom in **1**, with the distances of 2.124 and 2.329 Å. Due to stronger non-covalent bond interaction (Figure S6), the  $\Delta G$  of **3-TS1** was lower than that of **4-TS1** by 6.4 kcal mol<sup>-1</sup>. In the following step, **3** and **4** were obtained by hydrolysis of imine moiety, followed by H-transfer from the catalyst to N atom. The energy barrier in the re-generation of catalyst process was predicted to be the rate-determining step (RDS) of reaction, and the relative energy of two competing TSs (**3-TS2** and **4-TS2**) was comparable ( $\Delta\Delta G=0.7$  kcal mol<sup>-1</sup>).

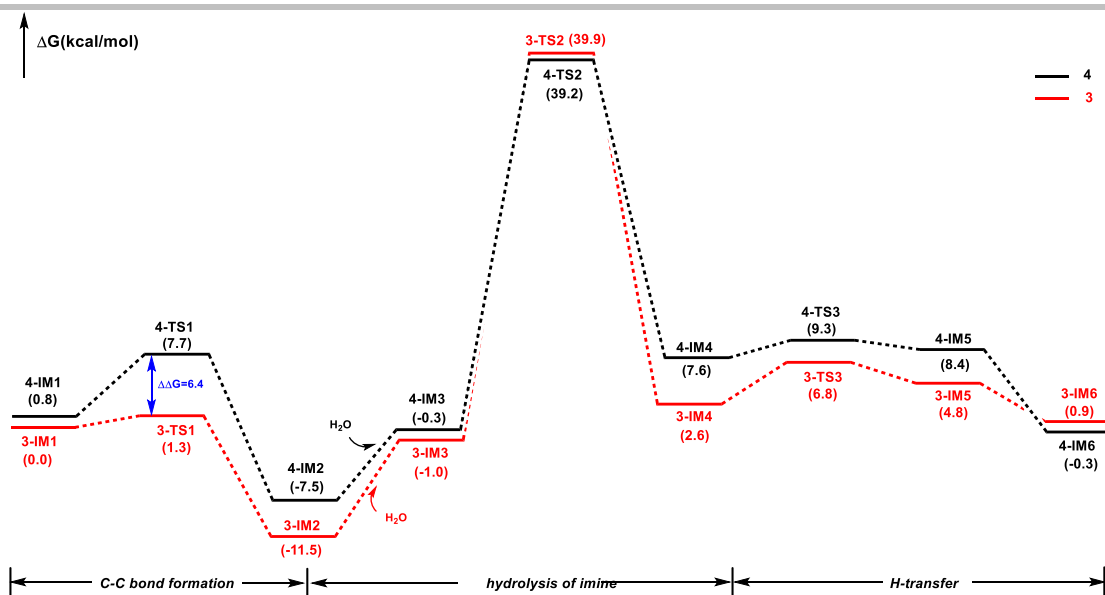

**Figure S1.** Energy profiles for the formation of **3** and **4** in the absence of H<sub>2</sub>O.

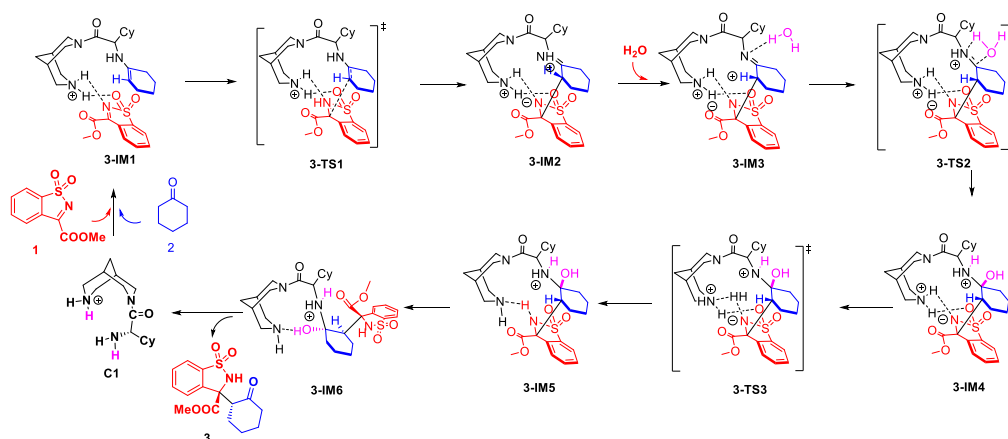

**Scheme S1.** Reaction mechanism for the formation of **3** without additional water.

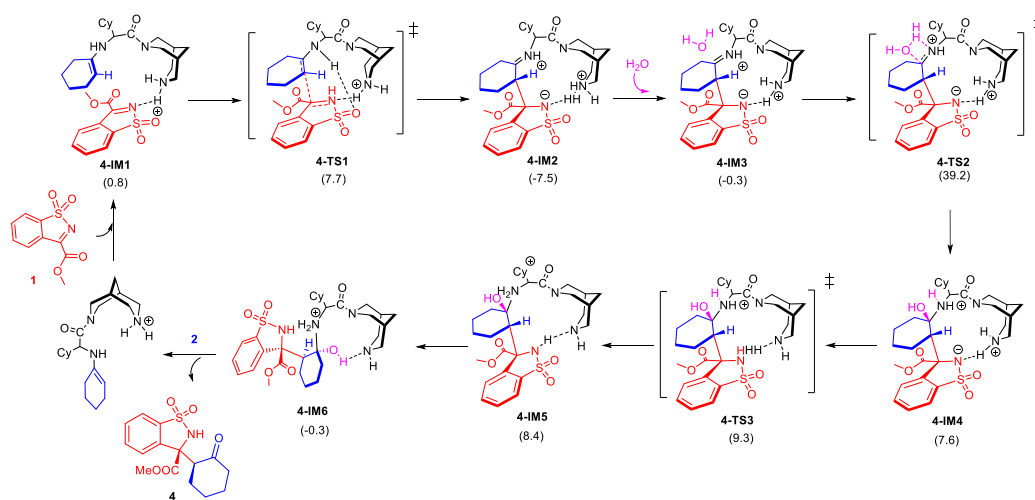

**Scheme S2.** Reaction mechanism for the formation of **4** without additional water.

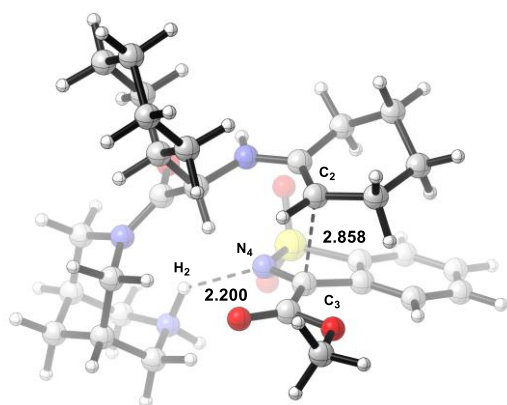

**3-IM1**  
(0.0)

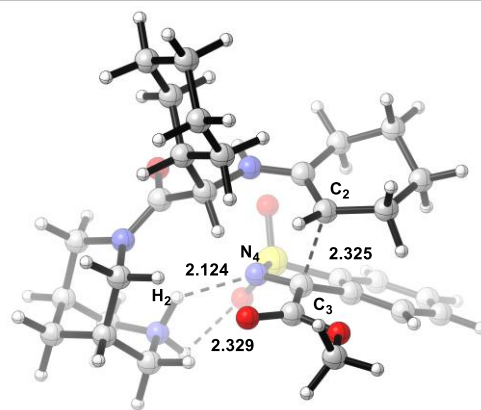

**3-TS1**  
(1.3)

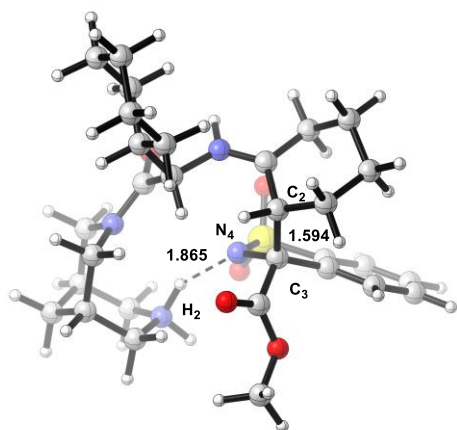

**3-IM2**  
(-11.5)

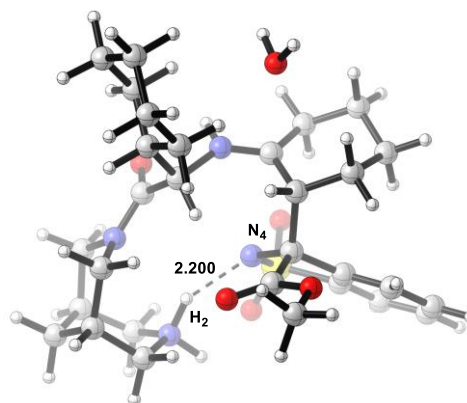

**3-IM3**  
(-1.0)

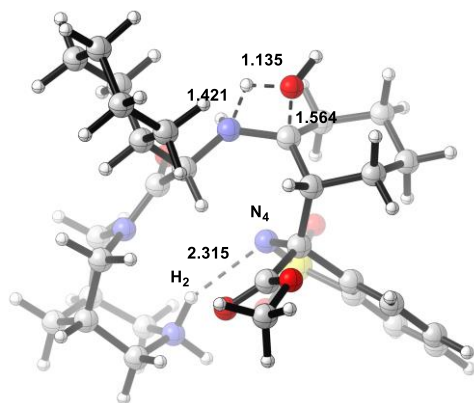

**3-TS2**  
(39.9)

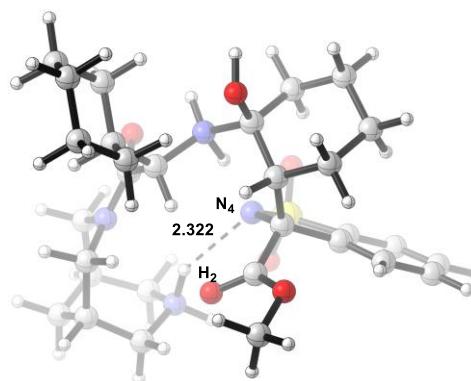

**3-IM4**  
(2.6)

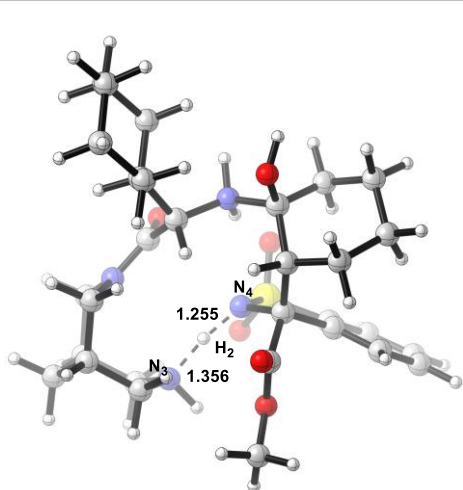

3-TS3  
(6.8)

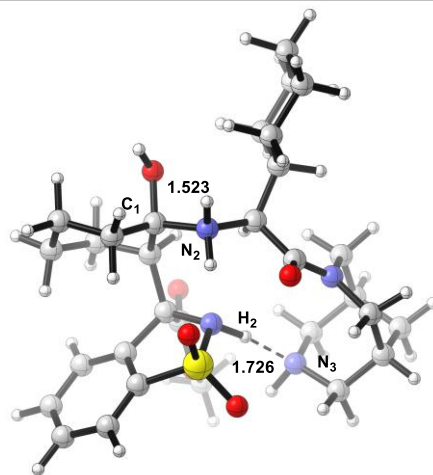

3-IM5  
(4.8)

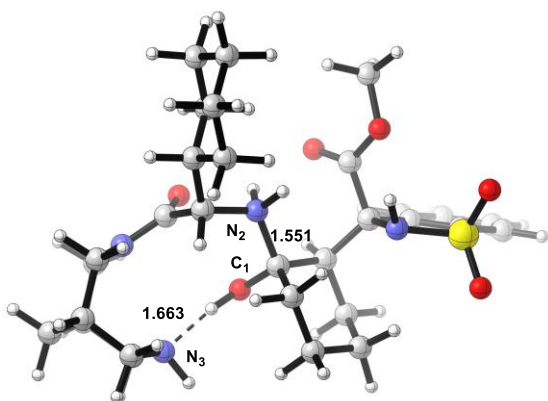

3-IM6  
(0.9)

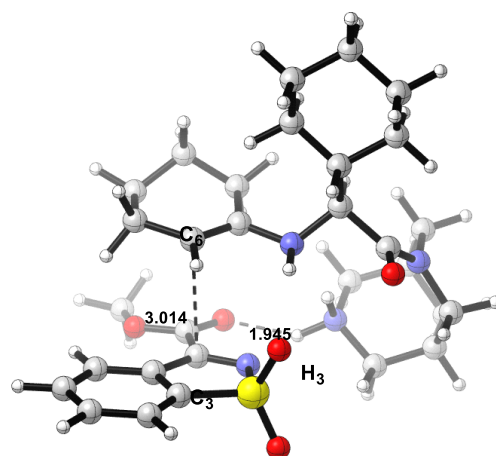

4-IM1  
(0.8)

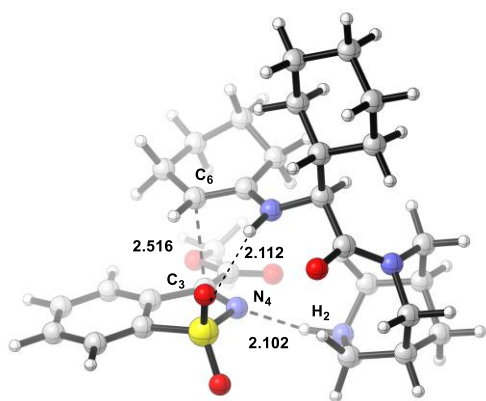

4-TS1  
(7.7)

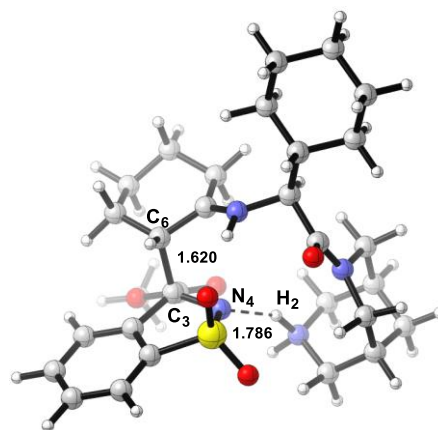

4-IM2  
(-7.5)

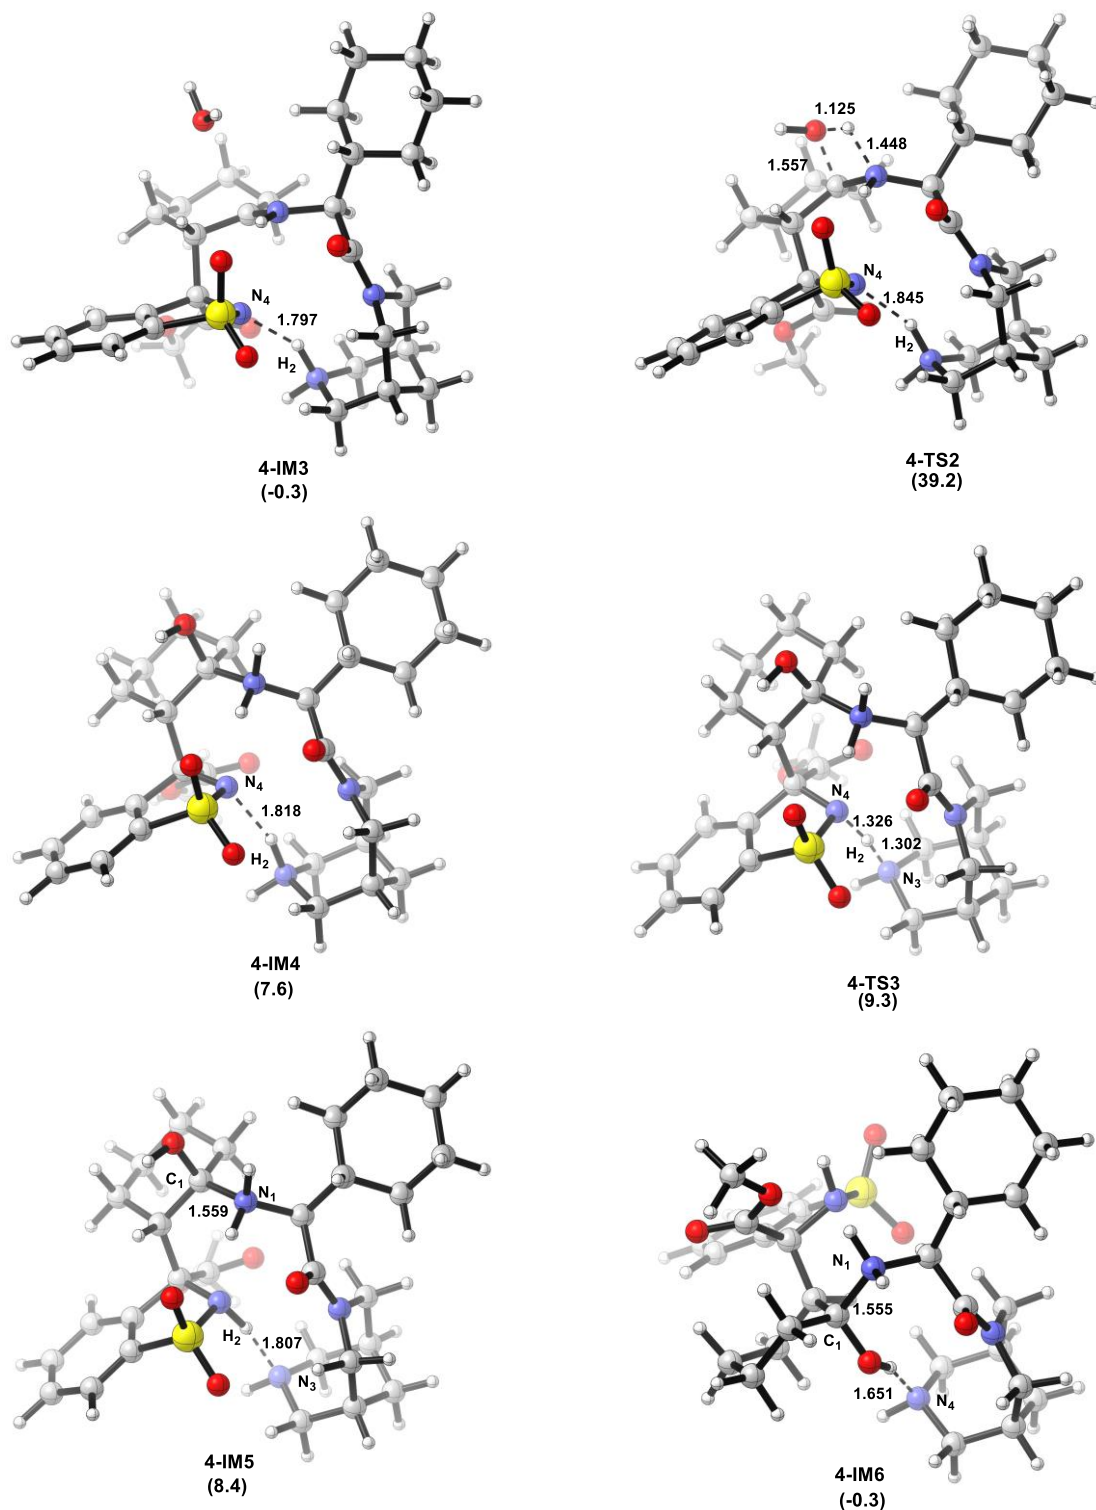

**Figure S2.** Optimized geometries of all stationary points in the catalytic reactions without additional water.

To get insight into the effect of water on the stereoselectivity of reaction, we studied the reaction mechanism in the presence of water. The optimized geometries of key intermediates and transition states with 1–4 waters in the structures were located. As shown in Table S10, the relative energy difference of the two competing TSs in C-C bond formation decreased, especially for those with four waters. The  $\Delta\Delta G$  between **3-TS1'** and **4-TS1'** in the C-C bond formation step decreased from 6.4 kcal mol<sup>-1</sup> (without water) to 0.4 kcal mol<sup>-1</sup> (four water). These results indicated that four waters could construct a suitable hydrogen bonding net, stabilizing the two competing transition states in the chiral controlling step well. In addition, water could also accelerate the re-generation of catalyst by decreasing the activation barrier in the hydrolysis of imine step by 5.8–8.4 kcal mol<sup>-1</sup>. Considering that **4-TS2'** was more stable than that of **3-TS2'** by 3.4 kcal mol<sup>-1</sup> in the rate-determining step, we assumed that **4** might be predominantly formed in the presence of water.

**Table S10.** Relative Gibbs free energy of transition states in the C-C bond formation step along **3** and **4** pathways.

| Path | $\Delta G$ (kcal mol <sup>-1</sup> ) |
|------|--------------------------------------|
|------|--------------------------------------|

|   | Without water | H <sub>2</sub> O | 2H <sub>2</sub> O | 3H <sub>2</sub> O | 4H <sub>2</sub> O |
|---|---------------|------------------|-------------------|-------------------|-------------------|
| 3 | 1.3           | 1.2              | 0.7               | 2.1               | 0.9               |
| 4 | 7.7           | 4.2              | 4.6               | 6.1               | 1.3               |

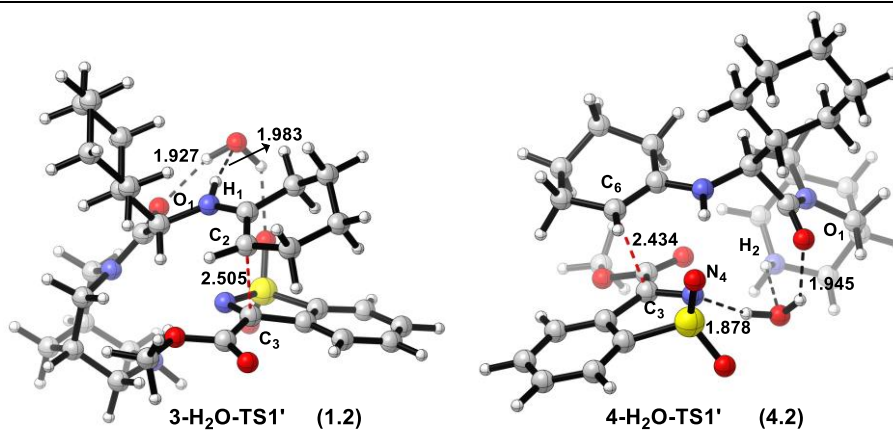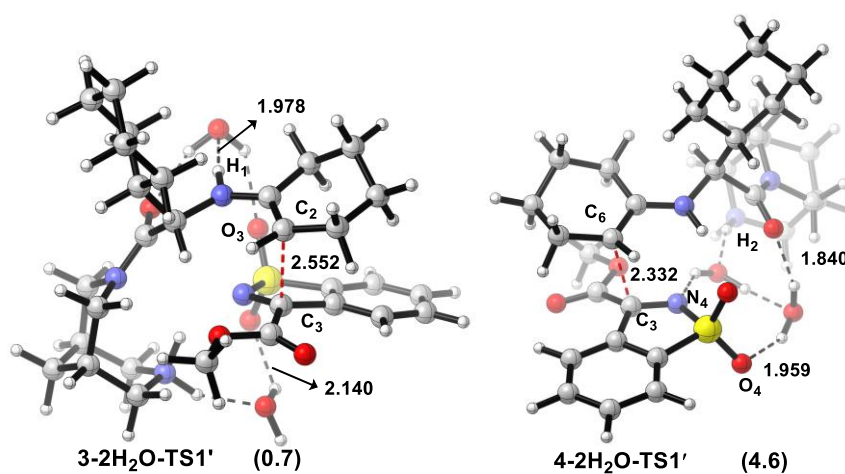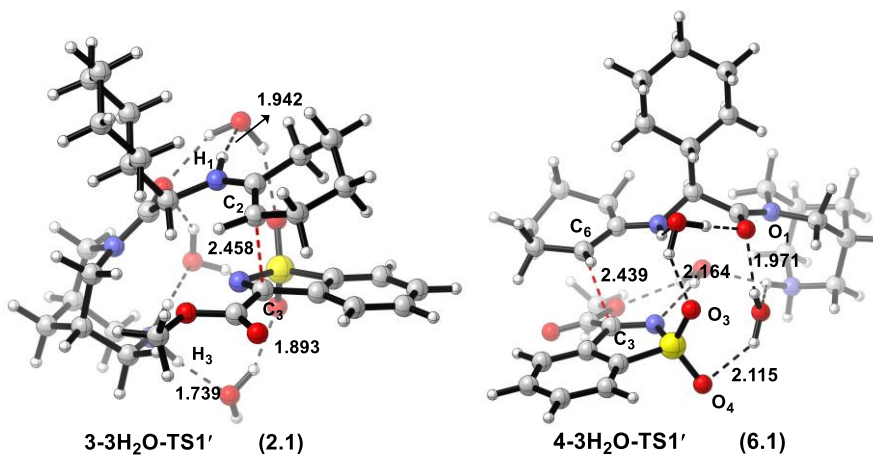



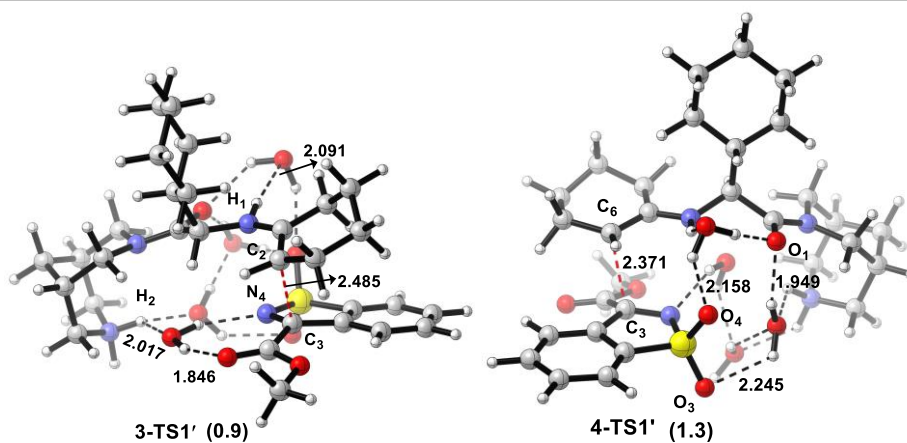

**Figure S3.** Optimized geometries of all stationary points in the catalytic reactions with different water molecules.

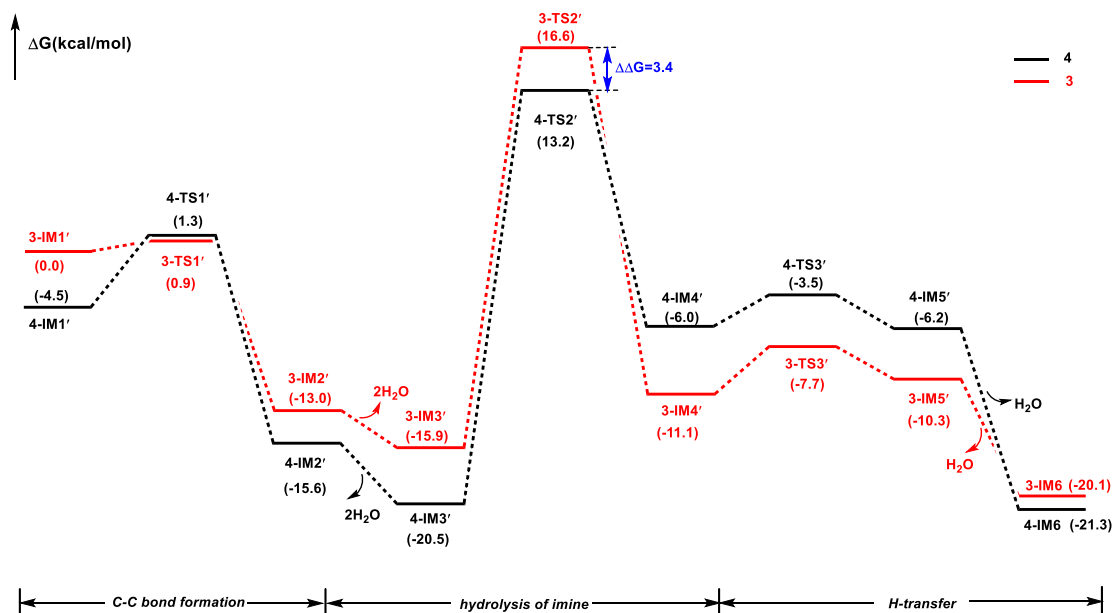

**Figure S4.** Reaction mechanism for the formation of 3 and 4. in the presence of four water molecules.

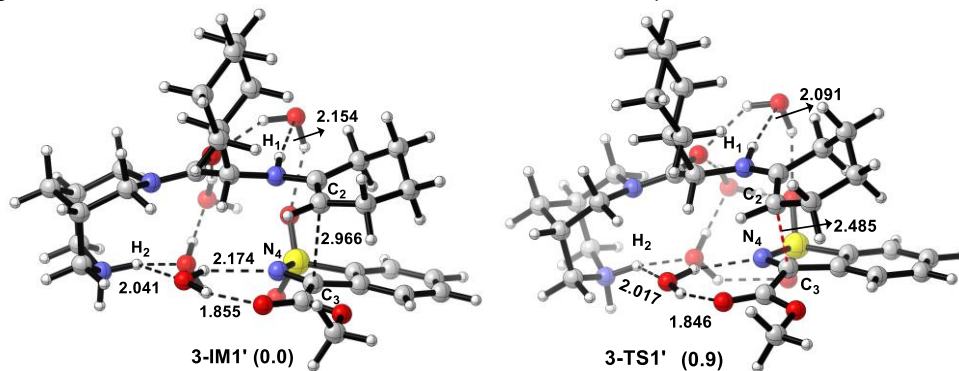

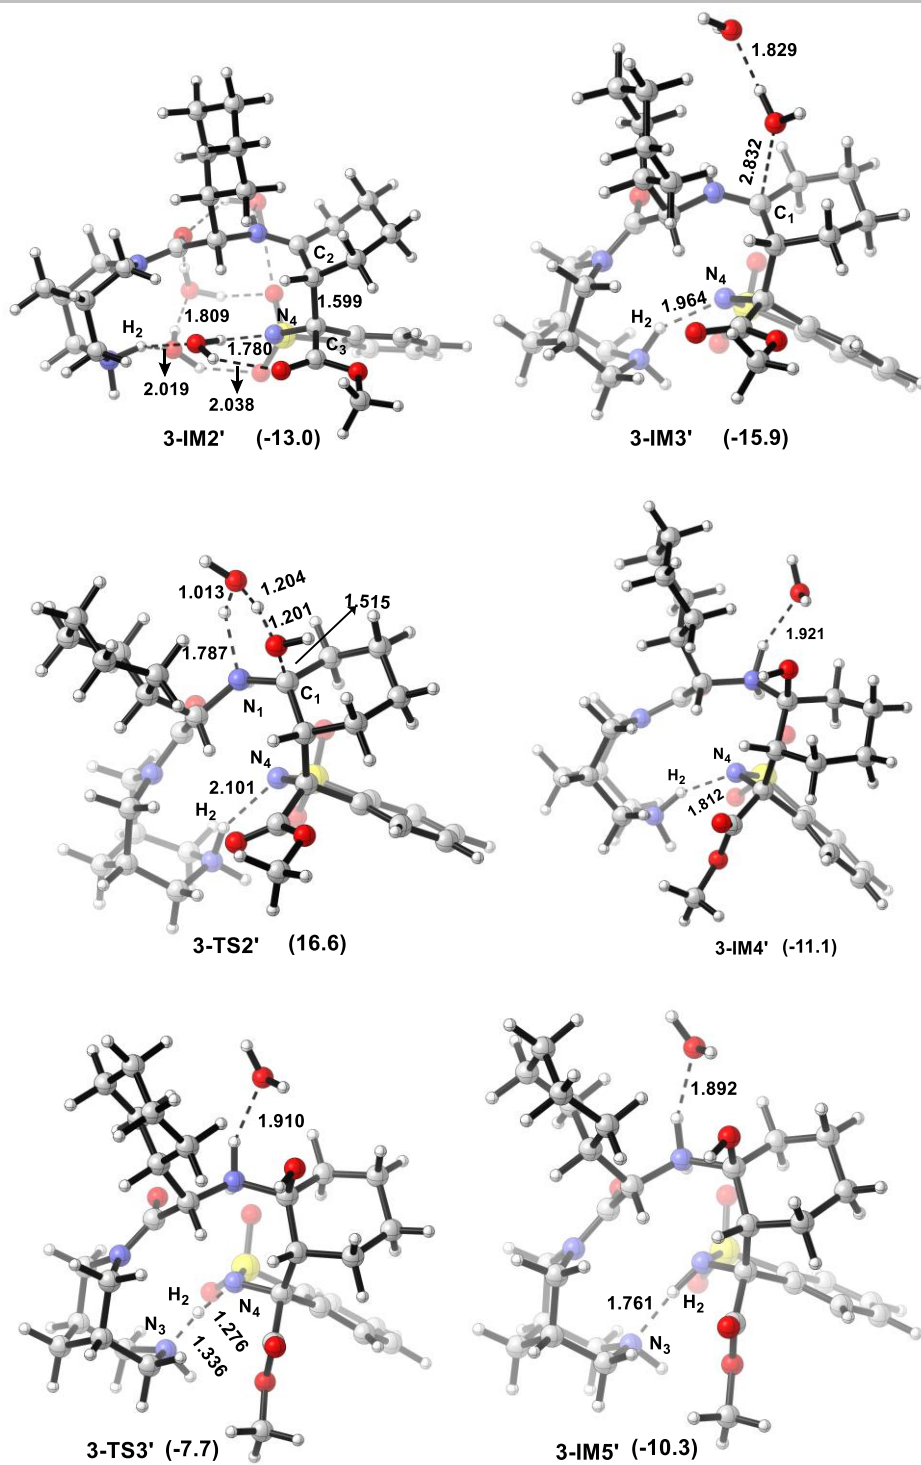

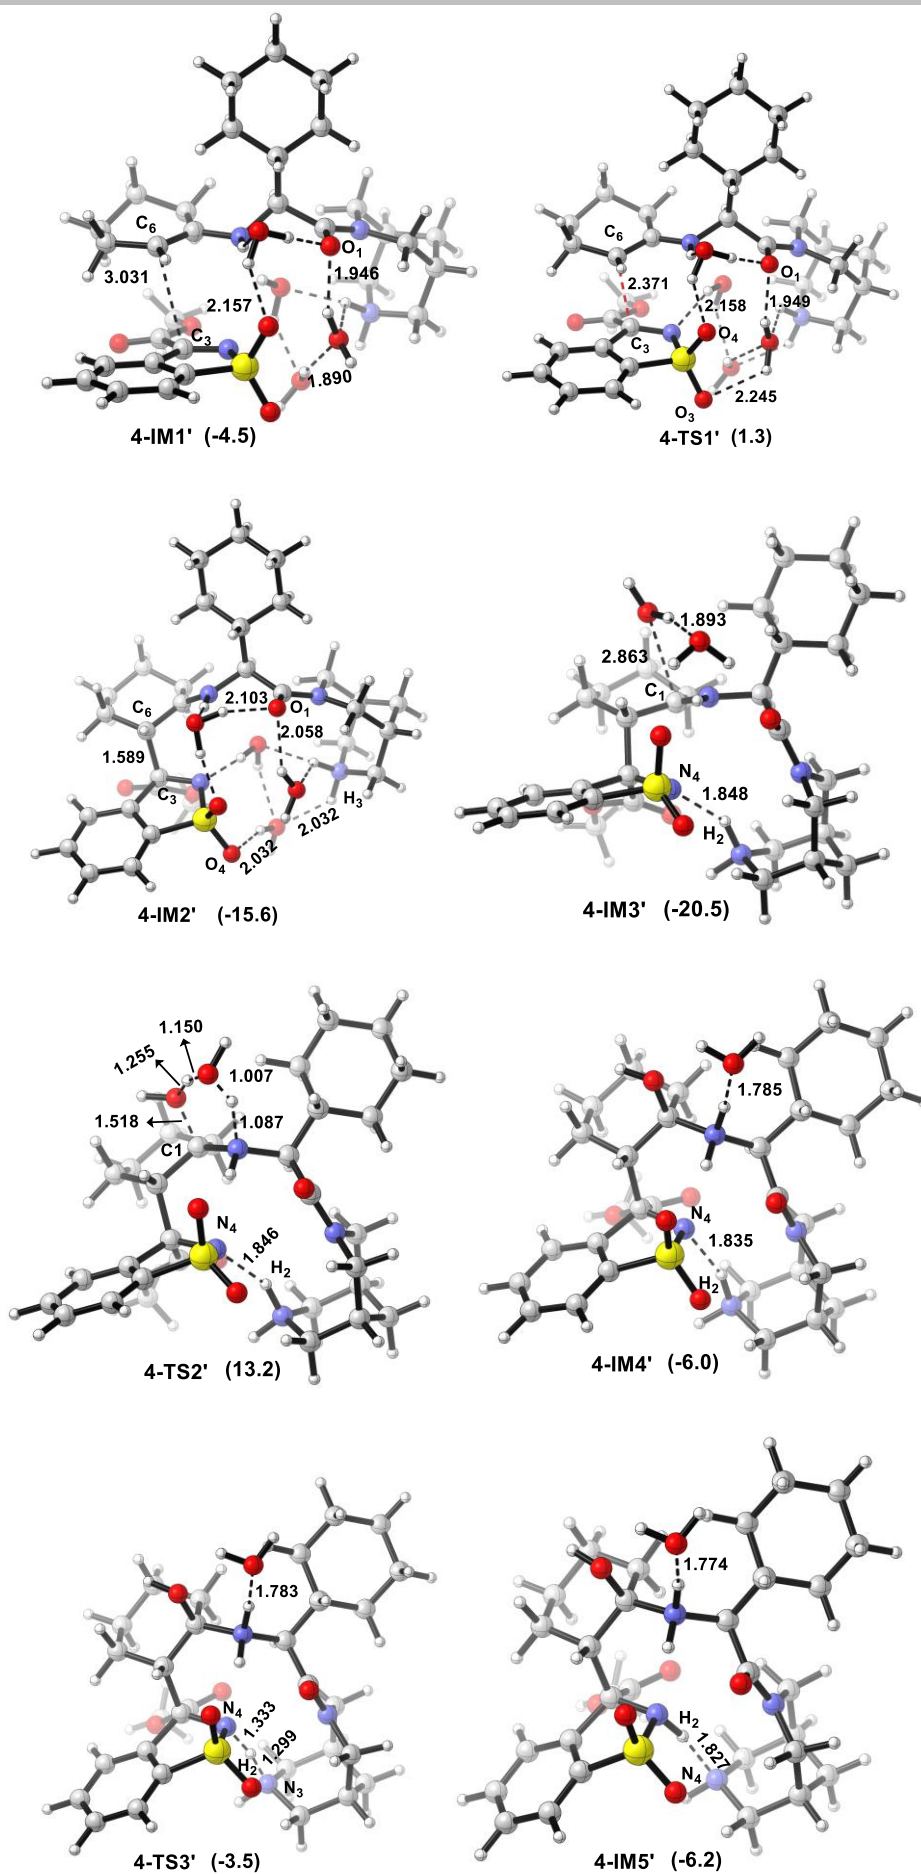

**Figure S5.** Optimized geometries of key intermediates and transition states in the catalytic reaction in the presence of additional water.

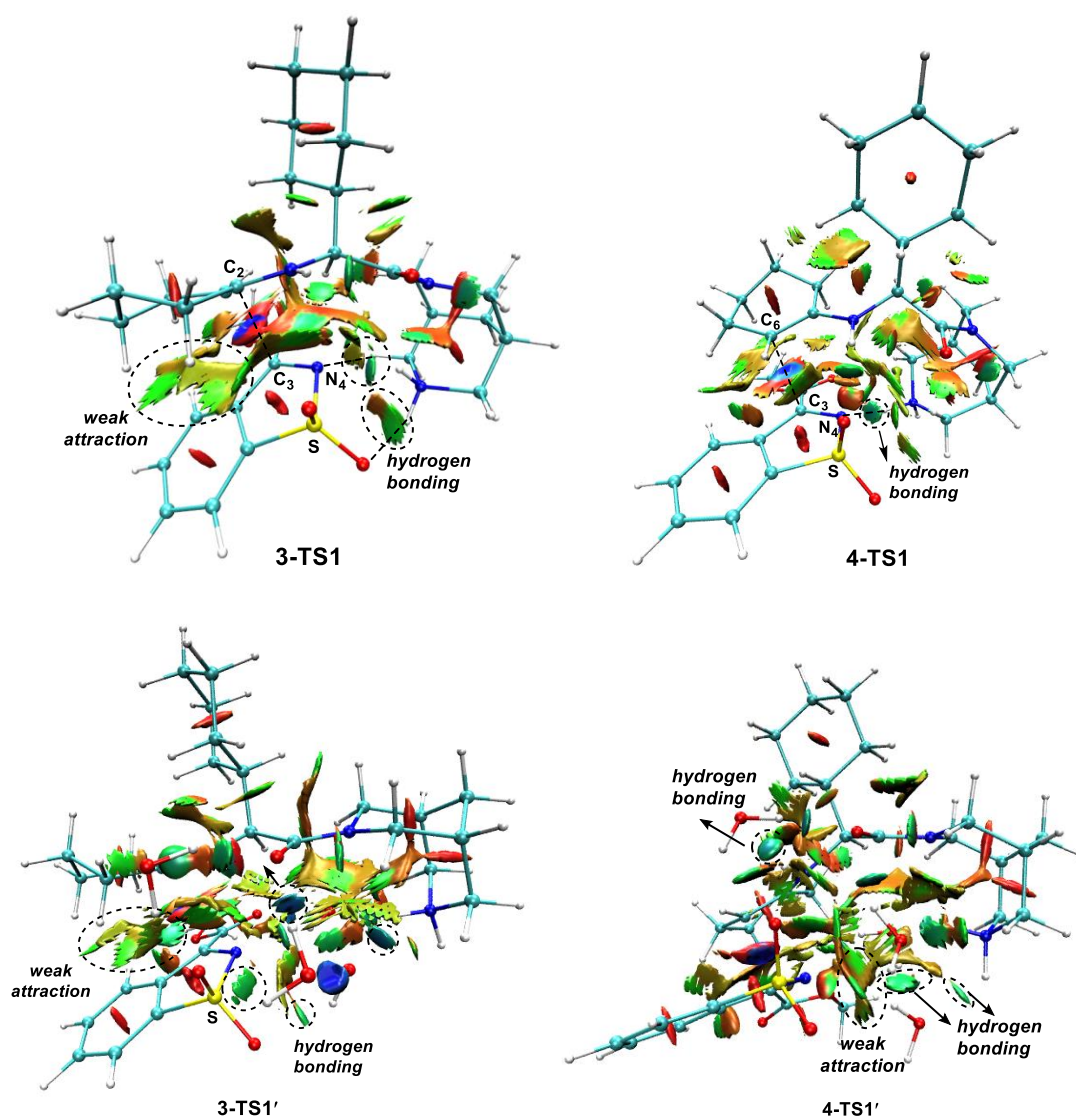

**Figure S6.** Non-covalent interaction analysis of transition states **3-TS1**, **4-TS1**, **3-TS1'**, and **4-TS1'**, obtained by VMD and Multiwfn software (isovalue = 0.50) (Green color represents attractive interaction, and red color represents repulsive interaction)

### Energies and coordinates

#### 3-IM1

Zero-point correction = 0.72610 a.u.

Thermal correction to Gibbs Free Energy = 0.65729 a.u.

Sum of electronic and zero-point Energies = -2160.83419 a.u.

Sum of electronic and thermal Free Energies = -2160.90300 a.u.

Standard orientation:

| Center Number | Atomic Number | Atomic Type | Coordinates (Angstroms) |           |           |
|---------------|---------------|-------------|-------------------------|-----------|-----------|
|               |               |             | X                       | Y         | Z         |
| 1             | 16            | 0           | 1.393612                | -1.762939 | -1.452516 |
| 2             | 6             | 0           | 3.056997                | -1.479080 | -0.907903 |
| 3             | 6             | 0           | 3.005306                | -0.882471 | 0.351380  |
| 4             | 6             | 0           | 1.582671                | -0.733179 | 0.774151  |
| 5             | 7             | 0           | 0.667977                | -1.156959 | -0.037832 |
| 6             | 6             | 0           | 4.228144                | -1.751293 | -1.587007 |
| 7             | 6             | 0           | 5.420119                | -1.421787 | -0.937460 |
| 8             | 6             | 0           | 5.399935                | -0.845733 | 0.332372  |
| 9             | 6             | 0           | 4.201544                | -0.567679 | 0.993890  |
| 10            | 8             | 0           | 1.084528                | -0.946851 | -2.612932 |
| 11            | 6             | 0           | 1.133734                | -0.306419 | 2.152012  |

|    |   |   |           |           |           |
|----|---|---|-----------|-----------|-----------|
| 12 | 8 | 0 | -0.016972 | -0.357778 | 2.523648  |
| 13 | 8 | 0 | 2.147342  | 0.086525  | 2.904315  |
| 14 | 6 | 0 | 1.797924  | 0.584537  | 4.207676  |
| 15 | 1 | 0 | 1.322527  | -0.203646 | 4.793457  |
| 16 | 1 | 0 | 2.736166  | 0.893189  | 4.663756  |
| 17 | 1 | 0 | 4.210379  | -0.113302 | 1.975627  |
| 18 | 1 | 0 | 6.337165  | -0.602151 | 0.821616  |
| 19 | 1 | 0 | 6.367971  | -1.619848 | -1.426307 |
| 20 | 1 | 0 | 4.223031  | -2.204608 | -2.572848 |
| 21 | 8 | 0 | 1.039807  | -3.181716 | -1.490060 |
| 22 | 1 | 0 | 1.119252  | 1.434383  | 4.107931  |
| 23 | 7 | 0 | -2.821590 | -0.948543 | -0.261433 |
| 24 | 6 | 0 | -3.030604 | -0.909027 | 1.188802  |
| 25 | 6 | 0 | -3.051184 | -2.332509 | 1.770821  |
| 26 | 6 | 0 | -4.139256 | -3.159131 | 1.079849  |
| 27 | 6 | 0 | -3.744361 | -1.823582 | -0.998329 |
| 28 | 6 | 0 | -3.781604 | -3.235969 | -0.407580 |
| 29 | 1 | 0 | -3.995061 | -0.429856 | 1.406102  |
| 30 | 1 | 0 | -2.239835 | -0.329632 | 1.663642  |
| 31 | 1 | 0 | -3.258331 | -2.243711 | 2.841802  |
| 32 | 6 | 0 | -1.708899 | -3.055760 | 1.648003  |

|    |   |   |           |           |           |    |   |   |           |           |           |
|----|---|---|-----------|-----------|-----------|----|---|---|-----------|-----------|-----------|
| 33 | 1 | 0 | -5.114019 | -2.677506 | 1.206741  | 10 | 8 | 0 | 1.120372  | -0.938302 | -2.625968 |
| 34 | 1 | 0 | -4.753297 | -1.393209 | -0.940690 | 11 | 6 | 0 | 1.067605  | -0.241176 | 2.140913  |
| 35 | 1 | 0 | -3.430521 | -1.836764 | -2.041440 | 12 | 8 | 0 | -0.090118 | -0.316937 | 2.495623  |
| 36 | 6 | 0 | -2.461666 | -3.984436 | -0.579834 | 13 | 8 | 0 | 2.063510  | 0.098383  | 2.948965  |
| 37 | 1 | 0 | -4.538352 | -3.805174 | -0.955954 | 14 | 6 | 0 | 1.678235  | 0.490094  | 4.277056  |
| 38 | 7 | 0 | -1.367348 | -3.329901 | 0.212071  | 15 | 1 | 0 | 1.200079  | -0.343812 | 4.792788  |
| 39 | 1 | 0 | -1.753381 | -4.025779 | 2.148460  | 16 | 1 | 0 | 2.601220  | 0.773690  | 4.778797  |
| 40 | 1 | 0 | -0.885494 | -2.465677 | 2.054384  | 17 | 1 | 0 | 4.154538  | 0.021635  | 2.015382  |
| 41 | 1 | 0 | -2.546942 | -5.007324 | -0.205945 | 18 | 1 | 0 | 6.291668  | -0.623163 | 0.974032  |
| 42 | 1 | 0 | -4.197241 | -4.161992 | 1.516349  | 19 | 1 | 0 | 6.358321  | -1.753939 | -1.220575 |
| 43 | 1 | 0 | -1.112322 | -2.436688 | -0.223038 | 20 | 1 | 0 | 4.227666  | -2.306487 | -2.409119 |
| 44 | 1 | 0 | -2.124848 | -4.003548 | -1.618297 | 21 | 8 | 0 | 1.046374  | -3.136099 | -1.463389 |
| 45 | 1 | 0 | -0.519183 | -3.904175 | 0.157450  | 22 | 1 | 0 | 0.990606  | 1.337406  | 4.228662  |
| 46 | 6 | 0 | -2.006811 | -0.115441 | -0.976370 | 23 | 7 | 0 | -2.851562 | -0.987544 | -0.335842 |
| 47 | 8 | 0 | -1.868004 | -0.240265 | -2.189639 | 24 | 6 | 0 | -3.067852 | -0.945375 | 1.116311  |
| 48 | 6 | 0 | -1.313419 | 1.047238  | -0.255803 | 25 | 6 | 0 | -3.057502 | -2.358991 | 1.723078  |
| 49 | 6 | 0 | -2.358716 | 2.178551  | -0.068983 | 26 | 6 | 0 | -4.091772 | -3.237553 | 1.015628  |
| 50 | 7 | 0 | -0.181719 | 1.420576  | -1.077888 | 27 | 6 | 0 | -3.724754 | -1.911271 | -1.072414 |
| 51 | 1 | 0 | -3.216187 | 1.728918  | 0.457240  | 28 | 6 | 0 | -3.692094 | -3.313666 | -0.460843 |
| 52 | 6 | 0 | -1.828861 | 3.314657  | 0.812151  | 29 | 1 | 0 | -4.046399 | -0.489248 | 1.318920  |
| 53 | 1 | 0 | -0.950001 | 0.725453  | 0.721081  | 30 | 1 | 0 | -2.297906 | -0.339681 | 1.592620  |
| 54 | 6 | 0 | 1.028526  | 1.886152  | -0.663121 | 31 | 1 | 0 | -3.303543 | -2.254288 | 2.784371  |
| 55 | 6 | 0 | 1.387623  | 2.114268  | 0.633110  | 32 | 6 | 0 | -1.690547 | -3.040469 | 1.657508  |
| 56 | 6 | 0 | 2.710289  | 2.719753  | 1.031435  | 33 | 1 | 0 | -5.090033 | -2.798408 | 1.110762  |
| 57 | 6 | 0 | 3.726531  | 2.775262  | -0.113544 | 34 | 1 | 0 | -4.754360 | -1.530816 | -1.038426 |
| 58 | 6 | 0 | 2.008287  | 2.118172  | -1.793608 | 35 | 1 | 0 | -3.393644 | -1.923146 | -2.110183 |
| 59 | 6 | 0 | 3.051916  | 3.168247  | -1.423855 | 36 | 6 | 0 | -2.326237 | -3.986097 | -0.596095 |
| 60 | 1 | 0 | 0.627606  | 2.054731  | 1.407994  | 37 | 1 | 0 | -4.400379 | -3.933680 | -1.018856 |
| 61 | 1 | 0 | 2.535445  | 3.737776  | 1.410394  | 38 | 7 | 0 | -1.288537 | -3.294502 | 0.236685  |
| 62 | 1 | 0 | 3.134327  | 2.161161  | 1.878128  | 39 | 1 | 0 | -1.727437 | -4.011721 | 2.156499  |
| 63 | 1 | 0 | 4.187893  | 1.789625  | -0.248888 | 40 | 1 | 0 | -0.902384 | -2.425647 | 2.095270  |
| 64 | 1 | 0 | 4.530304  | 3.473786  | 0.139469  | 41 | 1 | 0 | -2.372035 | -5.017554 | -0.239099 |
| 65 | 1 | 0 | 3.788677  | 3.257112  | -2.227807 | 42 | 1 | 0 | -4.116780 | -4.236751 | 1.463638  |
| 66 | 1 | 0 | 2.566433  | 4.146225  | -1.315408 | 43 | 1 | 0 | -1.032198 | -2.387620 | -0.174424 |
| 67 | 1 | 0 | 2.504861  | 1.169051  | -2.037485 | 44 | 1 | 0 | -1.958326 | -3.975703 | -1.624016 |
| 68 | 1 | 0 | 1.448440  | 2.413848  | -2.687178 | 45 | 1 | 0 | -0.417366 | -3.835869 | 0.207050  |
| 69 | 1 | 0 | -0.265236 | 1.128162  | -2.045782 | 46 | 6 | 0 | -2.121128 | -0.090615 | -1.057160 |
| 70 | 1 | 0 | -1.505432 | 2.912606  | 1.780971  | 47 | 8 | 0 | -2.069411 | -0.124287 | -2.283727 |
| 71 | 1 | 0 | -0.943473 | 3.756296  | 0.334868  | 48 | 6 | 0 | -1.370992 | 1.018581  | -0.314448 |
| 72 | 6 | 0 | -2.863401 | 2.728135  | -1.409123 | 49 | 6 | 0 | -2.329035 | 2.211031  | -0.073394 |
| 73 | 6 | 0 | -3.920444 | 3.814687  | -1.204650 | 50 | 7 | 0 | -0.233257 | 1.350595  | -1.160584 |
| 74 | 6 | 0 | -3.389334 | 4.944642  | -0.322429 | 51 | 1 | 0 | -3.231682 | 1.785032  | 0.393740  |
| 75 | 6 | 0 | -2.889860 | 4.399397  | 1.016752  | 52 | 6 | 0 | -1.729901 | 3.217363  | 0.914804  |
| 76 | 1 | 0 | -4.805706 | 3.371121  | -0.727832 | 53 | 1 | 0 | -0.995613 | 0.651099  | 0.638196  |
| 77 | 1 | 0 | -4.245673 | 4.206197  | -2.174397 | 54 | 6 | 0 | 0.976770  | 1.755343  | -0.795917 |
| 78 | 1 | 0 | -2.557985 | 5.443234  | -0.839359 | 55 | 6 | 0 | 1.400493  | 1.814844  | 0.537003  |
| 79 | 1 | 0 | -4.164585 | 5.701168  | -0.161038 | 56 | 6 | 0 | 2.683482  | 2.522960  | 0.908984  |
| 80 | 1 | 0 | -2.482713 | 5.208430  | 1.632622  | 57 | 6 | 0 | 3.671213  | 2.685706  | -0.249575 |
| 81 | 1 | 0 | -3.738004 | 3.972598  | 1.570100  | 58 | 6 | 0 | 1.943630  | 2.035925  | -1.919293 |
| 82 | 1 | 0 | -2.008695 | 3.150048  | -1.956006 | 59 | 6 | 0 | 2.949972  | 3.114615  | -1.523370 |
| 83 | 1 | 0 | -3.267359 | 1.919754  | -2.028135 | 60 | 1 | 0 | 0.617605  | 1.880657  | 1.286241  |
|    |   |   |           |           |           | 61 | 1 | 0 | 2.412196  | 3.518918  | 1.288341  |
|    |   |   |           |           |           | 62 | 1 | 0 | 3.159700  | 2.009302  | 1.752928  |
|    |   |   |           |           |           | 63 | 1 | 0 | 4.183395  | 1.736420  | -0.445279 |
|    |   |   |           |           |           | 64 | 1 | 0 | 4.438371  | 3.414312  | 0.029496  |
|    |   |   |           |           |           | 65 | 1 | 0 | 3.661450  | 3.264489  | -2.339969 |
|    |   |   |           |           |           | 66 | 1 | 0 | 2.430108  | 4.067087  | -1.361795 |
|    |   |   |           |           |           | 67 | 1 | 0 | 2.477047  | 1.104925  | -2.151795 |
|    |   |   |           |           |           | 68 | 1 | 0 | 1.380605  | 2.308483  | -2.816799 |
|    |   |   |           |           |           | 69 | 1 | 0 | -0.401611 | 1.174355  | -2.149216 |
|    |   |   |           |           |           | 70 | 1 | 0 | -1.456198 | 2.702936  | 1.845491  |
|    |   |   |           |           |           | 71 | 1 | 0 | -0.805264 | 3.631757  | 0.487975  |
|    |   |   |           |           |           | 72 | 6 | 0 | -2.753067 | 2.913297  | -1.369151 |
|    |   |   |           |           |           | 73 | 6 | 0 | -3.724164 | 4.061355  | -1.080537 |
|    |   |   |           |           |           | 74 | 6 | 0 | -3.125080 | 5.060867  | -0.089682 |
|    |   |   |           |           |           | 75 | 6 | 0 | -2.704588 | 4.361178  | 1.203416  |
|    |   |   |           |           |           | 76 | 1 | 0 | -4.653445 | 3.651395  | -0.661868 |
|    |   |   |           |           |           | 77 | 1 | 0 | -3.991925 | 4.564191  | -2.015619 |
|    |   |   |           |           |           | 78 | 1 | 0 | -2.244048 | 5.533977  | -0.544868 |
|    |   |   |           |           |           | 79 | 1 | 0 | -3.841725 | 5.860609  | 0.124507  |
|    |   |   |           |           |           | 80 | 1 | 0 | -2.248023 | 5.075468  | 1.896440  |
|    |   |   |           |           |           | 81 | 1 | 0 | -3.596002 | 3.956328  | 1.701881  |

### 3-TS1

Zero-point correction = 0.72566 a.u.

Thermal correction to Gibbs Free Energy = 0.65770 a.u.

Sum of electronic and zero-point Energies = -2160.83331 a.u.

Sum of electronic and thermal Free Energies = -2160.90127 a.u.

Standard orientation:

| Center Number | Atomic Number | Atomic Type | Coordinates (Angstroms) |           |           |
|---------------|---------------|-------------|-------------------------|-----------|-----------|
|               |               |             | X                       | Y         | Z         |
| 1             | 16            | 0           | 1.380814                | -1.706555 | -1.410611 |
| 2             | 6             | 0           | 3.037156                | -1.422576 | -0.841115 |
| 3             | 6             | 0           | 2.966888                | -0.748803 | 0.377050  |
| 4             | 6             | 0           | 1.530596                | -0.498088 | 0.732469  |
| 5             | 7             | 0           | 0.636122                | -1.078147 | -0.067354 |
| 6             | 6             | 0           | 4.221114                | -1.788488 | -1.455470 |
| 7             | 6             | 0           | 5.403965                | -1.480144 | -0.783493 |
| 8             | 6             | 0           | 5.363182                | -0.839096 | 0.455426  |
| 9             | 6             | 0           | 4.156643                | -0.467450 | 1.050615  |

|    |   |   |           |          |           |    |   |   |          |          |           |
|----|---|---|-----------|----------|-----------|----|---|---|----------|----------|-----------|
| 82 | 1 | 0 | -1.856488 | 3.317457 | -1.860206 | 59 | 6 | 0 | 1.601742 | 4.143888 | -0.860899 |
| 83 | 1 | 0 | -3.201375 | 2.195781 | -2.064330 | 60 | 1 | 0 | 0.019411 | 1.568248 | 1.427590  |

### 3-IM2

Zero-point correction = 0.72786 a.u.

Thermal correction to Gibbs Free Energy = 0.65930 a.u.

Sum of electronic and zero-point Energies = -2160.85007 a.u.

Sum of electronic and thermal Free Energies = -2160.91863 a.u.

Standard orientation:

| Center Number | Atomic Number | Atomic Type | Coordinates (Angstroms) |           |           |
|---------------|---------------|-------------|-------------------------|-----------|-----------|
|               |               |             | X                       | Y         | Z         |
| 1             | 16            | 0           | 1.644767                | -0.848698 | -1.560319 |
| 2             | 6             | 0           | 3.222680                | -0.242150 | -1.008266 |
| 3             | 6             | 0           | 3.039981                | 0.379143  | 0.216836  |
| 4             | 6             | 0           | 1.579248                | 0.326259  | 0.677289  |
| 5             | 7             | 0           | 0.868351                | -0.619907 | -0.180221 |
| 6             | 6             | 0           | 4.453473                | -0.328622 | -1.645376 |
| 7             | 6             | 0           | 5.552590                | 0.217291  | -0.989308 |
| 8             | 6             | 0           | 5.399614                | 0.817561  | 0.265094  |
| 9             | 6             | 0           | 4.151870                | 0.900085  | 0.878406  |
| 10            | 8             | 0           | 1.204991                | -0.000679 | -2.683853 |
| 11            | 6             | 0           | 1.434012                | -0.297632 | 2.079238  |
| 12            | 8             | 0           | 0.460721                | -0.137501 | 2.784517  |
| 13            | 8             | 0           | 2.439182                | -1.107055 | 2.386673  |
| 14            | 6             | 0           | 2.341334                | -1.770739 | 3.655789  |
| 15            | 1             | 0           | 1.490991                | -2.456334 | 3.664962  |
| 16            | 1             | 0           | 3.272819                | -2.321902 | 3.770201  |
| 17            | 1             | 0           | 4.058193                | 1.347585  | 1.862811  |
| 18            | 1             | 0           | 6.270313                | 1.217399  | 0.775016  |
| 19            | 1             | 0           | 6.536017                | 0.162319  | -1.444580 |
| 20            | 1             | 0           | 4.554388                | -0.817950 | -2.609280 |
| 21            | 8             | 0           | 1.675103                | -2.292704 | -1.876238 |
| 22            | 1             | 0           | 2.228610                | -1.037585 | 4.456363  |
| 23            | 7             | 0           | -2.343122               | -1.672842 | -0.546590 |
| 24            | 6             | 0           | -2.707274               | -1.855742 | 0.864792  |
| 25            | 6             | 0           | -2.226270               | -3.206894 | 1.409410  |
| 26            | 6             | 0           | -2.735533               | -4.341060 | 0.517939  |
| 27            | 6             | 0           | -2.681609               | -2.785615 | -1.441312 |
| 28            | 6             | 0           | -2.161525               | -4.110154 | -0.881779 |
| 29            | 1             | 0           | -3.800858               | -1.812015 | 0.960401  |
| 30            | 1             | 0           | -2.286562               | -1.051464 | 1.470510  |
| 31            | 1             | 0           | -2.629815               | -3.303099 | 2.421808  |
| 32            | 6             | 0           | -0.706790               | -3.298089 | 1.534863  |
| 33            | 1             | 0           | -3.829995               | -4.332667 | 0.482386  |
| 34            | 1             | 0           | -3.772067               | -2.843120 | -1.561060 |
| 35            | 1             | 0           | -2.240605               | -2.569946 | -2.414514 |
| 36            | 6             | 0           | -0.634823               | -4.178856 | -0.836124 |
| 37            | 1             | 0           | -2.485796               | -4.902632 | -1.563306 |
| 38            | 7             | 0           | -0.047271               | -3.260066 | 0.193957  |
| 39            | 1             | 0           | -0.424328               | -4.238316 | 2.014847  |
| 40            | 1             | 0           | -0.299844               | -2.460423 | 2.107974  |
| 41            | 1             | 0           | -0.319168               | -5.189010 | -0.563840 |
| 42            | 1             | 0           | -2.416521               | -5.310985 | 0.913989  |
| 43            | 1             | 0           | -0.009473               | -2.263973 | -0.118853 |
| 44            | 1             | 0           | -0.173754               | -3.898249 | -1.784958 |
| 45            | 1             | 0           | 0.945874                | -3.493530 | 0.292111  |
| 46            | 6             | 0           | -2.068781               | -0.471345 | -1.122567 |
| 47            | 8             | 0           | -2.052486               | -0.297514 | -2.336072 |
| 48            | 6             | 0           | -1.768416               | 0.712708  | -0.202184 |
| 49            | 6             | 0           | -3.049039               | 1.478001  | 0.192274  |
| 50            | 7             | 0           | -0.859202               | 1.571606  | -0.966321 |
| 51            | 1             | 0           | -3.734303               | 0.722884  | 0.604526  |
| 52            | 6             | 0           | -2.760746               | 2.502611  | 1.295751  |
| 53            | 1             | 0           | -1.243183               | 0.369881  | 0.684007  |
| 54            | 6             | 0           | 0.278285                | 2.055013  | -0.603782 |
| 55            | 6             | 0           | 0.850528                | 1.742314  | 0.744978  |
| 56            | 6             | 0           | 1.657527                | 2.918906  | 1.332045  |
| 57            | 6             | 0           | 2.472475                | 3.728273  | 0.321083  |
| 58            | 6             | 0           | 1.051069                | 2.895409  | -1.563078 |

|    |   |   |           |          |           |
|----|---|---|-----------|----------|-----------|
| 61 | 1 | 0 | 0.933066  | 3.597347 | 1.797761  |
| 62 | 1 | 0 | 2.283290  | 2.544403 | 2.148521  |
| 63 | 1 | 0 | 3.322229  | 3.149205 | -0.053229 |
| 64 | 1 | 0 | 2.878989  | 4.611935 | 0.822320  |
| 65 | 1 | 0 | 2.178573  | 4.723656 | -1.585577 |
| 66 | 1 | 0 | 0.772296  | 4.775750 | -0.521235 |
| 67 | 1 | 0 | 1.890659  | 2.275396 | -1.906743 |
| 68 | 1 | 0 | 0.439579  | 3.135763 | -2.436891 |
| 69 | 1 | 0 | -1.143497 | 1.697695 | -1.940990 |
| 70 | 1 | 0 | -2.292490 | 2.002516 | 2.153137  |
| 71 | 1 | 0 | -2.039688 | 3.243029 | 0.918172  |
| 72 | 6 | 0 | -3.744322 | 2.142366 | -1.003011 |
| 73 | 6 | 0 | -5.028593 | 2.847401 | -0.562077 |
| 74 | 6 | 0 | -4.743256 | 3.874126 | 0.535509  |
| 75 | 6 | 0 | -4.042062 | 3.220718 | 1.727775  |
| 76 | 1 | 0 | -5.738686 | 2.100038 | -0.183494 |
| 77 | 1 | 0 | -5.501436 | 3.328840 | -1.423911 |
| 78 | 1 | 0 | -4.099148 | 4.665307 | 0.128144  |
| 79 | 1 | 0 | -5.672540 | 4.635813 | 0.859632  |
| 80 | 1 | 0 | -3.809988 | 3.967734 | 2.493584  |
| 81 | 1 | 0 | -4.720882 | 2.490583 | 2.188445  |
| 82 | 1 | 0 | -3.067690 | 2.889961 | -1.441808 |
| 83 | 1 | 0 | -3.954979 | 1.402103 | -1.781657 |

### 3-IM3

Zero-point correction = 0.75235 a.u.

Thermal correction to Gibbs Free Energy = 0.68008 a.u.

Sum of electronic and zero-point Energies = -2237.22564 a.u.

Sum of electronic and thermal Free Energies = -2237.29791 a.u.

Standard orientation:

| Center Number | Atomic Number | Atomic Type | Coordinates (Angstroms) |           |           |
|---------------|---------------|-------------|-------------------------|-----------|-----------|
|               |               |             | X                       | Y         | Z         |
| 1             | 8             | 0           | 0.744154                | -4.331290 | -0.803655 |
| 2             | 1             | 0           | 1.124246                | -4.519771 | -1.672602 |
| 3             | 1             | 0           | 0.692074                | -5.194869 | -0.371744 |
| 4             | 16            | 0           | -1.994983               | 1.395528  | -1.274459 |
| 5             | 6             | 0           | -3.452264               | 0.770072  | -0.479382 |
| 6             | 6             | 0           | -3.067311               | -0.086568 | 0.542004  |
| 7             | 6             | 0           | -1.532150               | -0.224018 | 0.606486  |
| 8             | 7             | 0           | -0.941027               | 0.779166  | -0.257731 |
| 9             | 6             | 0           | -4.773579               | 1.057389  | -0.790056 |
| 10            | 6             | 0           | -5.759680               | 0.463342  | -0.008513 |
| 11            | 6             | 0           | -5.400726               | -0.373527 | 1.050768  |
| 12            | 6             | 0           | -4.065648               | -0.652943 | 1.339293  |
| 13            | 8             | 0           | -1.946578               | 0.870618  | -2.654134 |
| 14            | 1             | 0           | -3.823570               | -1.286750 | 2.182657  |
| 15            | 1             | 0           | -6.175919               | -0.813929 | 1.669802  |
| 16            | 1             | 0           | -6.806821               | 0.661863  | -0.212015 |
| 17            | 1             | 0           | -5.022637               | 1.728501  | -1.606418 |
| 18            | 8             | 0           | -1.960721               | 2.877068  | -1.229809 |
| 19            | 6             | 0           | -1.016111               | -0.002414 | 2.035942  |
| 20            | 8             | 0           | -0.073999               | 0.700721  | 2.324406  |
| 21            | 8             | 0           | -1.651590               | -0.764402 | 2.921525  |
| 22            | 6             | 0           | -1.154627               | -0.706299 | 4.268606  |
| 23            | 1             | 0           | -0.114933               | -1.038083 | 4.298571  |
| 24            | 1             | 0           | -1.227999               | 0.312326  | 4.653176  |
| 25            | 1             | 0           | -1.787606               | -1.377674 | 4.845358  |
| 26            | 7             | 0           | 2.402687                | 1.831357  | -0.548049 |
| 27            | 6             | 0           | 2.753476                | 1.928079  | 0.879502  |
| 28            | 6             | 0           | 2.407374                | 3.299191  | 1.491164  |
| 29            | 6             | 0           | 2.933981                | 4.431467  | 0.607394  |
| 30            | 6             | 0           | 2.771678                | 2.971847  | -1.393989 |
| 31            | 6             | 0           | 2.277523                | 4.270269  | -0.765145 |
| 32            | 1             | 0           | 3.835476                | 1.773257  | 0.985637  |
| 33            | 1             | 0           | 2.240606                | 1.141117  | 1.436769  |
| 34            | 1             | 0           | 2.879817                | 3.329296  | 2.477762  |
| 35            | 6             | 0           | 0.911994                | 3.516506  | 1.707541  |

|    |   |   |           |           |           |    |   |   |           |           |           |
|----|---|---|-----------|-----------|-----------|----|---|---|-----------|-----------|-----------|
| 36 | 1 | 0 | 4.022584  | 4.372502  | 0.504407  | 10 | 6 | 0 | -5.701186 | 0.571026  | 0.597464  |
| 37 | 1 | 0 | 3.862438  | 3.010416  | -1.517321 | 11 | 6 | 0 | -5.240881 | -0.289568 | 1.597487  |
| 38 | 1 | 0 | 2.323342  | 2.811347  | -2.373897 | 12 | 6 | 0 | -3.903988 | -0.678690 | 1.660803  |
| 39 | 6 | 0 | 0.749403  | 4.323282  | 0.656997  | 13 | 8 | 0 | -2.354094 | 0.754778  | -2.676293 |
| 40 | 1 | 0 | 2.567159  | 5.091557  | -1.427753 | 14 | 1 | 0 | -3.568558 | -1.323535 | 2.464952  |
| 41 | 7 | 0 | 0.193683  | 3.414101  | 0.403955  | 15 | 1 | 0 | -5.934813 | -0.658359 | 2.346070  |
| 42 | 1 | 0 | 0.733611  | 4.521833  | 2.097979  | 16 | 1 | 0 | -6.747329 | 0.857792  | 0.569969  |
| 43 | 1 | 0 | 0.473696  | 2.779118  | 2.375752  | 17 | 1 | 0 | -5.142540 | 1.770555  | -1.118557 |
| 44 | 1 | 0 | 0.434640  | 5.331907  | -0.377667 | 18 | 8 | 0 | -1.987159 | 2.664349  | -1.178742 |
| 45 | 1 | 0 | 2.688550  | 5.400486  | 1.054294  | 19 | 6 | 0 | -0.916681 | -0.043891 | 1.882476  |
| 46 | 1 | 0 | 0.257414  | 4.042339  | -1.590123 | 20 | 8 | 0 | -0.321310 | 0.990320  | 2.080614  |
| 47 | 1 | 0 | -0.800933 | 3.643767  | 0.509203  | 21 | 8 | 0 | -1.168685 | -0.933861 | 2.841236  |
| 48 | 6 | 0 | 2.121037  | 0.669655  | -1.192315 | 22 | 6 | 0 | -0.736731 | -0.572153 | 4.162388  |
| 49 | 8 | 0 | 2.165104  | 0.561656  | -2.415597 | 23 | 1 | 0 | 0.342245  | -0.407220 | 4.174354  |
| 50 | 6 | 0 | 1.713829  | -0.551762 | -0.360881 | 24 | 1 | 0 | -1.251025 | 0.333544  | 4.489551  |
| 51 | 6 | 0 | 2.936890  | -1.370978 | 0.099984  | 25 | 1 | 0 | -1.001296 | -1.413230 | 4.800082  |
| 52 | 7 | 0 | 0.840708  | -1.307104 | -1.266190 | 26 | 7 | 0 | 2.236213  | 1.726420  | -0.609816 |
| 53 | 1 | 0 | 3.661367  | -0.643984 | 0.496419  | 27 | 6 | 0 | 2.663490  | 1.906790  | 0.789000  |
| 54 | 6 | 0 | 2.547996  | -2.317706 | 1.240282  | 28 | 6 | 0 | 2.376619  | 3.321159  | 1.333802  |
| 55 | 1 | 0 | 1.130187  | -0.230194 | 0.498018  | 29 | 6 | 0 | 2.852216  | 4.390274  | 0.349390  |
| 56 | 6 | 0 | -0.349086 | -1.759600 | -1.067304 | 30 | 6 | 0 | 2.530073  | 2.823550  | -1.542773 |
| 57 | 6 | 0 | -0.976327 | -1.720395 | 0.298317  | 31 | 6 | 0 | 2.090275  | 4.158712  | -0.956392 |
| 58 | 6 | 0 | -1.963019 | -2.884670 | 0.486239  | 32 | 1 | 0 | 3.746135  | 1.737932  | 0.857081  |
| 59 | 6 | 0 | -2.898137 | -3.109888 | -0.701248 | 33 | 1 | 0 | 2.159613  | 1.167423  | 1.417783  |
| 60 | 6 | 0 | -1.126231 | -2.239288 | -2.249391 | 34 | 1 | 0 | 2.913507  | 3.403568  | 2.283333  |
| 61 | 6 | 0 | -2.081272 | -3.398659 | -1.956369 | 35 | 6 | 0 | 0.900636  | 3.569769  | 1.630043  |
| 62 | 1 | 0 | -0.158547 | -1.886881 | 1.006359  | 36 | 1 | 0 | 3.928600  | 4.304291  | 0.166855  |
| 63 | 1 | 0 | -1.362350 | -3.790928 | 0.623020  | 37 | 1 | 0 | 3.607201  | 2.848797  | -1.756824 |
| 64 | 1 | 0 | -2.513019 | -2.731747 | 1.416485  | 38 | 1 | 0 | 2.003255  | 2.611011  | -2.471584 |
| 65 | 1 | 0 | -3.533501 | -2.233218 | -0.871976 | 39 | 6 | 0 | 0.573611  | 4.222124  | -0.745852 |
| 66 | 1 | 0 | -3.562318 | -3.950970 | -0.480110 | 40 | 1 | 0 | 2.330815  | 4.936536  | -1.687649 |
| 67 | 1 | 0 | -2.733068 | -3.534149 | -2.823474 | 41 | 7 | 0 | 0.104849  | 3.350698  | 0.386496  |
| 68 | 1 | 0 | -1.503330 | -4.316803 | -1.818505 | 42 | 1 | 0 | 0.744476  | 4.611238  | 1.924144  |
| 69 | 1 | 0 | -1.708688 | -1.352393 | -2.548969 | 43 | 1 | 0 | 0.507995  | 2.909328  | 2.396725  |
| 70 | 1 | 0 | -0.442624 | -2.461911 | -3.074674 | 44 | 1 | 0 | 0.273787  | 5.239017  | -0.480642 |
| 71 | 1 | 0 | 1.186022  | -1.300076 | -2.229349 | 45 | 1 | 0 | 2.656773  | 5.387401  | 0.757264  |
| 72 | 1 | 0 | 2.098175  | -1.738555 | 2.058187  | 46 | 1 | 0 | 0.020371  | 3.902466  | -1.629540 |
| 73 | 1 | 0 | 1.789501  | -3.017550 | 0.864734  | 47 | 1 | 0 | -0.891439 | 3.541566  | 0.535459  |
| 74 | 6 | 0 | 3.613718  | -2.134879 | -1.043659 | 48 | 6 | 0 | 1.925629  | 0.532704  | -1.181602 |
| 75 | 6 | 0 | 4.825633  | -2.917871 | -0.533860 | 49 | 8 | 0 | 1.835873  | 0.408938  | -2.402222 |
| 76 | 6 | 0 | 4.421699  | -3.871221 | 0.592428  | 50 | 6 | 0 | 1.717446  | -0.717534 | -0.306547 |
| 77 | 6 | 0 | 3.757505  | -3.109041 | 1.740957  | 51 | 6 | 0 | 3.063876  | -1.283831 | 0.192515  |
| 78 | 1 | 0 | 5.583411  | -2.215205 | -0.161446 | 52 | 7 | 0 | 1.035982  | -1.690359 | -1.179843 |
| 79 | 1 | 0 | 5.283735  | -3.471599 | -1.359759 | 53 | 1 | 0 | 3.592556  | -0.462792 | 0.693075  |
| 80 | 1 | 0 | 3.709269  | -4.607985 | 0.195900  | 54 | 6 | 0 | 2.849537  | -2.379875 | 1.242011  |
| 81 | 1 | 0 | 5.293202  | -4.426185 | 0.954716  | 55 | 1 | 0 | 1.090387  | -0.468592 | 0.548748  |
| 82 | 1 | 0 | 3.448838  | -3.799769 | 2.532797  | 56 | 6 | 0 | -0.302526 | -2.249363 | -0.988806 |
| 83 | 1 | 0 | 4.486192  | -2.417410 | 2.185397  | 57 | 6 | 0 | -1.084713 | -1.999405 | 0.302624  |
| 84 | 1 | 0 | 2.889647  | -2.847459 | -1.461271 | 58 | 6 | 0 | -2.244080 | -3.016715 | 0.327144  |
| 85 | 1 | 0 | 3.899781  | -1.444986 | -1.845792 | 59 | 6 | 0 | -3.128230 | -2.962654 | -0.921573 |
| 86 | 1 | 0 | 0.153915  | 2.417127  | 0.100261  | 60 | 6 | 0 | -1.108958 | -2.265328 | -2.269800 |
|    |   |   |           |           |           | 61 | 6 | 0 | -2.306338 | -3.216903 | -2.184148 |
|    |   |   |           |           |           | 62 | 1 | 0 | -0.402012 | -2.274371 | 1.112653  |
|    |   |   |           |           |           | 63 | 1 | 0 | -1.807002 | -4.018419 | 0.410484  |
|    |   |   |           |           |           | 64 | 1 | 0 | -2.831833 | -2.872359 | 1.233609  |
|    |   |   |           |           |           | 65 | 1 | 0 | -3.618029 | -1.986171 | -1.004136 |
|    |   |   |           |           |           | 66 | 1 | 0 | -3.922139 | -3.710571 | -0.834609 |
|    |   |   |           |           |           | 67 | 1 | 0 | -2.919440 | -3.087507 | -3.079831 |
|    |   |   |           |           |           | 68 | 1 | 0 | -1.967624 | -4.262616 | -2.195234 |
|    |   |   |           |           |           | 69 | 1 | 0 | -1.441300 | -1.237699 | -2.448964 |
|    |   |   |           |           |           | 70 | 1 | 0 | -0.444484 | -2.546578 | -3.096253 |
|    |   |   |           |           |           | 71 | 1 | 0 | 1.128841  | -1.322357 | -2.135112 |
|    |   |   |           |           |           | 72 | 1 | 0 | 2.238075  | -1.985859 | 2.064744  |
|    |   |   |           |           |           | 73 | 1 | 0 | 2.287426  | -3.214908 | 0.799730  |
|    |   |   |           |           |           | 74 | 6 | 0 | 3.960671  | -1.777506 | -0.948599 |
|    |   |   |           |           |           | 75 | 6 | 0 | 5.296070  | -2.294095 | -0.408662 |
|    |   |   |           |           |           | 76 | 6 | 0 | 5.079282  | -3.396260 | 0.629114  |
|    |   |   |           |           |           | 77 | 6 | 0 | 4.186504  | -2.906908 | 1.771221  |
|    |   |   |           |           |           | 78 | 1 | 0 | 5.844122  | -1.463348 | 0.056238  |
|    |   |   |           |           |           | 79 | 1 | 0 | 5.914646  | -2.661389 | -1.233873 |
|    |   |   |           |           |           | 80 | 1 | 0 | 4.601699  | -4.258209 | 0.143157  |
|    |   |   |           |           |           | 81 | 1 | 0 | 6.039972  | -3.744258 | 1.022516  |

### 3-TS2

Zero-point correction = 0.75313 a.u.

Thermal correction to Gibbs Free Energy = 0.68618 a.u.

Sum of electronic and zero-point Energies = -2237.17165 a.u.

Sum of electronic and thermal Free Energies = -2237.23860 a.u.

Standard orientation:

| Center Number | Atomic Number | Atomic Type | Coordinates (Angstroms) |           |           |
|---------------|---------------|-------------|-------------------------|-----------|-----------|
|               |               |             | X                       | Y         | Z         |
| 1             | 8             | 0           | 0.280621                | -3.686916 | -0.793457 |
| 2             | 1             | 0           | 1.212880                | -3.095070 | -1.057494 |
| 3             | 1             | 0           | -0.019977               | -4.323873 | -1.473354 |
| 4             | 16            | 0           | -2.131812               | 1.190319  | -1.282670 |
| 5             | 6             | 0           | -3.490004               | 0.674733  | -0.265878 |
| 6             | 6             | 0           | -3.018186               | -0.211424 | 0.687296  |
| 7             | 6             | 0           | -1.497535               | -0.471924 | 0.520541  |
| 8             | 7             | 0           | -0.986243               | 0.406244  | -0.513030 |
| 9             | 6             | 0           | -4.815312               | 1.078360  | -0.348642 |

|    |   |   |          |           |           |    |   |   |           |           |           |
|----|---|---|----------|-----------|-----------|----|---|---|-----------|-----------|-----------|
| 82 | 1 | 0 | 4.012443 | -3.709453 | 2.495094  | 56 | 6 | 0 | -0.366839 | -2.274034 | -0.826391 |
| 83 | 1 | 0 | 4.701070 | -2.098209 | 2.307475  | 57 | 6 | 0 | -1.113592 | -1.825814 | 0.453339  |
| 84 | 1 | 0 | 3.452675 | -2.594526 | -1.479465 | 58 | 6 | 0 | -2.219235 | -2.863481 | 0.723414  |
| 85 | 1 | 0 | 4.123628 | -0.976827 | -1.679170 | 59 | 6 | 0 | -3.164163 | -3.084679 | -0.461913 |
| 86 | 1 | 0 | 0.103553 | 2.347825  | 0.121856  | 60 | 6 | 0 | -1.306985 | -2.440548 | -2.023636 |

### 3-IM4

Zero-point correction = 0.75523 a.u.

Thermal correction to Gibbs Free Energy = 0.68607 a.u.

Sum of electronic and zero-point Energies = -2237.23021 a.u.

Sum of electronic and thermal Free Energies = -2237.29936 a.u.

Standard orientation:

| Center Number | Atomic Number | Atomic Type | Coordinates (Angstroms) |           |           |
|---------------|---------------|-------------|-------------------------|-----------|-----------|
|               |               |             | X                       | Y         | Z         |
| 1             | 8             | 0           | 0.256515                | -3.481371 | -0.501090 |
| 2             | 1             | 0           | 1.044561                | -1.455524 | -2.151766 |
| 3             | 1             | 0           | 0.397034                | -3.994754 | -1.312065 |
| 4             | 16            | 0           | -1.985449               | 1.404526  | -1.384870 |
| 5             | 6             | 0           | -3.447442               | 0.850825  | -0.561719 |
| 6             | 6             | 0           | -3.099804               | -0.003632 | 0.474617  |
| 7             | 6             | 0           | -1.580351               | -0.282330 | 0.519155  |
| 8             | 7             | 0           | -0.950779               | 0.542016  | -0.512279 |
| 9             | 6             | 0           | -4.746644               | 1.258917  | -0.832114 |
| 10            | 6             | 0           | -5.752517               | 0.786552  | 0.002407  |
| 11            | 6             | 0           | -5.428064               | -0.032249 | 1.087595  |
| 12            | 6             | 0           | -4.115082               | -0.421831 | 1.340569  |
| 13            | 8             | 0           | -1.976660               | 1.022089  | -2.804212 |
| 14            | 1             | 0           | -3.898175               | -1.029736 | 2.208719  |
| 15            | 1             | 0           | -6.214006               | -0.370113 | 1.755451  |
| 16            | 1             | 0           | -6.784397               | 1.071000  | -0.174516 |
| 17            | 1             | 0           | -4.960907               | 1.927564  | -1.660130 |
| 18            | 8             | 0           | -1.821841               | 2.858002  | -1.160338 |
| 19            | 6             | 0           | -1.044486               | 0.148325  | 1.894922  |
| 20            | 8             | 0           | -0.103797               | 0.893043  | 2.060556  |
| 21            | 8             | 0           | -1.668710               | -0.471074 | 2.889104  |
| 22            | 6             | 0           | -1.142808               | -0.241044 | 4.206705  |
| 23            | 1             | 0           | -0.105198               | -0.577230 | 4.256242  |
| 24            | 1             | 0           | -1.200884               | 0.819393  | 4.456950  |
| 25            | 1             | 0           | -1.766840               | -0.827812 | 4.877605  |
| 26            | 7             | 0           | 2.566918                | 1.652127  | -0.528211 |
| 27            | 6             | 0           | 2.928323                | 1.757657  | 0.896311  |
| 28            | 6             | 0           | 2.658192                | 3.161080  | 1.479662  |
| 29            | 6             | 0           | 3.230692                | 4.246992  | 0.566702  |
| 30            | 6             | 0           | 2.992748                | 2.757572  | -1.396050 |
| 31            | 6             | 0           | 2.551338                | 4.086806  | -0.794787 |
| 32            | 1             | 0           | 4.001232                | 1.549929  | 1.001277  |
| 33            | 1             | 0           | 2.379726                | 1.007120  | 1.470652  |
| 34            | 1             | 0           | 3.139242                | 3.189350  | 2.461934  |
| 35            | 6             | 0           | 1.178434                | 3.466588  | 1.698967  |
| 36            | 1             | 0           | 4.313316                | 4.131451  | 0.450369  |
| 37            | 1             | 0           | 4.084421                | 2.743926  | -1.512366 |
| 38            | 1             | 0           | 2.543606                | 2.596834  | -2.374926 |
| 39            | 6             | 0           | 1.024579                | 4.193792  | -0.682823 |
| 40            | 1             | 0           | 2.864010                | 4.882926  | -1.477294 |
| 41            | 7             | 0           | 0.442904                | 3.328038  | 0.404758  |
| 42            | 1             | 0           | 1.053875                | 4.503637  | 2.021632  |
| 43            | 1             | 0           | 0.710038                | 2.801758  | 2.417894  |
| 44            | 1             | 0           | 0.740984                | 5.216842  | -0.424695 |
| 45            | 1             | 0           | 3.040370                | 5.235135  | 0.997826  |
| 46            | 1             | 0           | 0.521403                | 3.907713  | -1.608292 |
| 47            | 1             | 0           | -0.546871               | 3.580883  | 0.506680  |
| 48            | 6             | 0           | 2.206265                | 0.503403  | -1.160182 |
| 49            | 8             | 0           | 2.220104                | 0.397877  | -2.384459 |
| 50            | 6             | 0           | 1.712188                | -0.697738 | -0.338050 |
| 51            | 6             | 0           | 2.898594                | -1.607316 | 0.030090  |
| 52            | 7             | 0           | 0.644326                | -1.246092 | -1.232583 |
| 53            | 1             | 0           | 3.718386                | -0.910716 | 0.271279  |
| 54            | 6             | 0           | 2.650531                | -2.430962 | 1.298807  |
| 55            | 1             | 0           | 1.208196                | -0.353034 | 0.566483  |

|    |   |   |           |           |           |
|----|---|---|-----------|-----------|-----------|
| 61 | 6 | 0 | -2.387914 | -3.477801 | -1.717174 |
| 62 | 1 | 0 | -0.369176 | -1.951918 | 1.250210  |
| 63 | 1 | 0 | -1.712755 | -3.808452 | 0.943977  |
| 64 | 1 | 0 | -2.766760 | -2.592503 | 1.627288  |
| 65 | 1 | 0 | -3.742234 | -2.178806 | -0.673537 |
| 66 | 1 | 0 | -3.884581 | -3.867058 | -0.202771 |
| 67 | 1 | 0 | -3.059819 | -3.560082 | -2.575828 |
| 68 | 1 | 0 | -1.924128 | -4.460800 | -1.574658 |
| 69 | 1 | 0 | -1.762498 | -1.471334 | -2.262487 |
| 70 | 1 | 0 | -0.707833 | -2.740254 | -2.893899 |
| 71 | 1 | 0 | -0.029190 | -0.355590 | -1.279140 |
| 72 | 1 | 0 | 2.344452  | -1.759343 | 2.112567  |
| 73 | 1 | 0 | 1.827646  | -3.131670 | 1.121503  |
| 74 | 6 | 0 | 3.389538  | -2.479993 | -1.130055 |
| 75 | 6 | 0 | 4.643750  | -3.258252 | -0.724359 |
| 76 | 6 | 0 | 4.394649  | -4.087597 | 0.537239  |
| 77 | 6 | 0 | 3.911353  | -3.205124 | 1.690585  |
| 78 | 1 | 0 | 5.460999  | -2.549078 | -0.535905 |
| 79 | 1 | 0 | 4.964316  | -3.902335 | -1.549553 |
| 80 | 1 | 0 | 3.630304  | -4.847325 | 0.323045  |
| 81 | 1 | 0 | 5.305304  | -4.623578 | 0.824438  |
| 82 | 1 | 0 | 3.716024  | -3.811403 | 2.581215  |
| 83 | 1 | 0 | 4.705671  | -2.493447 | 1.955125  |
| 84 | 1 | 0 | 2.600744  | -3.193408 | -1.399089 |
| 85 | 1 | 0 | 3.586653  | -1.859493 | -2.011902 |
| 86 | 1 | 0 | 0.400949  | 2.333266  | 0.123089  |

### 3-TS3

Zero-point correction = 0.75398 a.u.

Thermal correction to Gibbs Free Energy = 0.68839 a.u.

Sum of electronic and zero-point Energies = -2237.22846 a.u.

Sum of electronic and thermal Free Energies = -2237.29405 a.u.

Standard orientation:

| Center Number | Atomic Number | Atomic Type | Coordinates (Angstroms) |           |           |
|---------------|---------------|-------------|-------------------------|-----------|-----------|
|               |               |             | X                       | Y         | Z         |
| 1             | 8             | 0           | 1.022208                | -3.169447 | 0.591620  |
| 2             | 1             | 0           | 1.559039                | -2.069058 | -1.560107 |
| 3             | 1             | 0           | 1.272679                | -3.942554 | 0.060476  |
| 4             | 16            | 0           | -1.686997               | 0.535506  | -1.764108 |
| 5             | 6             | 0           | -3.196117               | -0.138355 | -1.148852 |
| 6             | 6             | 0           | -2.993117               | -0.583611 | 0.144863  |
| 7             | 6             | 0           | -1.548726               | -0.371613 | 0.645674  |
| 8             | 7             | 0           | -0.893904               | 0.529919  | -0.331087 |
| 9             | 6             | 0           | -4.419781               | -0.187683 | -1.804154 |
| 10            | 6             | 0           | -5.500804               | -0.688431 | -1.088051 |
| 11            | 6             | 0           | -5.336998               | -1.098358 | 0.239043  |
| 12            | 6             | 0           | -4.094904               | -1.045690 | 0.865515  |
| 13            | 8             | 0           | -1.093133               | -0.426291 | -2.711924 |
| 14            | 1             | 0           | -3.997869               | -1.353521 | 1.902764  |
| 15            | 1             | 0           | -6.196659               | -1.454344 | 0.797474  |
| 16            | 1             | 0           | -6.479863               | -0.738963 | -1.552271 |
| 17            | 1             | 0           | -4.527420               | 0.171948  | -2.822540 |
| 18            | 8             | 0           | -1.843127               | 1.905402  | -2.254289 |
| 19            | 6             | 0           | -1.685567               | 0.403381  | 1.984196  |
| 20            | 8             | 0           | -1.211533               | 0.058518  | 3.039040  |
| 21            | 8             | 0           | -2.416852               | 1.507589  | 1.831159  |
| 22            | 6             | 0           | -2.708969               | 2.235283  | 3.036832  |
| 23            | 1             | 0           | -3.342645               | 1.628436  | 3.686838  |
| 24            | 1             | 0           | -1.789456               | 2.495697  | 3.563596  |
| 25            | 1             | 0           | -3.240150               | 3.130691  | 2.718342  |
| 26            | 7             | 0           | 2.113460                | 1.958599  | -0.608643 |
| 27            | 6             | 0           | 2.537610                | 2.184773  | 0.773968  |
| 28            | 6             | 0           | 1.808233                | 3.376547  | 1.402474  |
| 29            | 6             | 0           | 2.002104                | 4.617146  | 0.529508  |



|    |   |   |           |           |           |    |    |   |           |           |           |
|----|---|---|-----------|-----------|-----------|----|----|---|-----------|-----------|-----------|
| 30 | 6 | 0 | 2.130488  | 3.136260  | -1.479903 | 4  | 16 | 0 | -1.722511 | 0.559831  | -1.798601 |
| 31 | 6 | 0 | 1.383873  | 4.302487  | -0.833480 | 5  | 6  | 0 | -3.238480 | -0.043477 | -1.134145 |
| 32 | 1 | 0 | 3.617802  | 2.387616  | 0.782750  | 6  | 6  | 0 | -3.028285 | -0.514702 | 0.150839  |
| 33 | 1 | 0 | 2.366772  | 1.290601  | 1.375030  | 7  | 6  | 0 | -1.577770 | -0.356823 | 0.649471  |
| 34 | 1 | 0 | 2.249507  | 3.531065  | 2.392255  | 8  | 7  | 0 | -0.890965 | 0.480586  | -0.359491 |
| 35 | 6 | 0 | 0.314584  | 3.128212  | 1.616374  | 9  | 6  | 0 | -4.474194 | -0.038958 | -1.768662 |
| 36 | 1 | 0 | 3.068387  | 4.845783  | 0.424221  | 10 | 6  | 0 | -5.560075 | -0.511017 | -1.041340 |
| 37 | 1 | 0 | 3.171960  | 3.428503  | -1.671766 | 11 | 6  | 0 | -5.387780 | -0.949590 | 0.275163  |
| 38 | 1 | 0 | 1.673410  | 2.850519  | -2.427266 | 12 | 6  | 0 | -4.134756 | -0.950235 | 0.880844  |
| 39 | 6 | 0 | -0.115279 | 4.048917  | -0.669131 | 13 | 8  | 0 | -1.190181 | -0.437542 | -2.734231 |
| 40 | 1 | 0 | 1.483982  | 5.160546  | -1.506068 | 14 | 1  | 0 | -4.031625 | -1.278278 | 1.911098  |
| 41 | 7 | 0 | -0.444653 | 3.003975  | 0.342966  | 15 | 1  | 0 | -6.249378 | -1.285000 | 0.842985  |
| 42 | 1 | 0 | -0.095662 | 3.959239  | 2.203159  | 16 | 1  | 0 | -6.547859 | -0.517900 | -1.489244 |
| 43 | 1 | 0 | 0.166152  | 2.204106  | 2.187460  | 17 | 1  | 0 | -4.586323 | 0.338793  | -2.779838 |
| 44 | 1 | 0 | -0.583910 | 4.988811  | -0.352758 | 18 | 8  | 0 | -1.791878 | 1.943452  | -2.251712 |
| 45 | 1 | 0 | 1.513000  | 5.485199  | 0.985195  | 19 | 6  | 0 | -1.677937 | 0.466312  | 1.964103  |
| 46 | 1 | 0 | -0.571192 | 3.733891  | -1.610066 | 20 | 8  | 0 | -1.212910 | 0.129176  | 3.024312  |
| 47 | 1 | 0 | -1.430198 | 3.142888  | 0.573704  | 21 | 8  | 0 | -2.371107 | 1.585485  | 1.775047  |
| 48 | 6 | 0 | 1.895938  | 0.752669  | -1.173827 | 22 | 6  | 0 | -2.639482 | 2.364570  | 2.954638  |
| 49 | 8 | 0 | 1.711743  | 0.590096  | -2.378646 | 23 | 1  | 0 | -3.276148 | 1.792481  | 3.632648  |
| 50 | 6 | 0 | 1.881514  | -0.477931 | -0.263437 | 24 | 1  | 0 | -1.709897 | 2.631005  | 3.460395  |
| 51 | 6 | 0 | 3.334568  | -0.962948 | -0.019120 | 25 | 1  | 0 | -3.158947 | 3.254938  | 2.604859  |
| 52 | 7 | 0 | 0.984688  | -1.455547 | -0.970577 | 26 | 7  | 0 | 2.164311  | 1.875872  | -0.619981 |
| 53 | 1 | 0 | 3.950451  | -0.053950 | -0.096818 | 27 | 6  | 0 | 2.616296  | 2.078902  | 0.758958  |
| 54 | 6 | 0 | 3.576160  | -1.520313 | 1.388545  | 28 | 6  | 0 | 2.003114  | 3.332041  | 1.393105  |
| 55 | 1 | 0 | 1.398319  | -0.246235 | 0.682835  | 29 | 6  | 0 | 2.279082  | 4.543518  | 0.501561  |
| 56 | 6 | 0 | 0.118254  | -2.376059 | -0.124801 | 30 | 6  | 0 | 2.201248  | 3.049607  | -1.499465 |
| 57 | 6 | 0 | -0.706098 | -1.658356 | 0.974234  | 31 | 6  | 0 | 1.580869  | 4.278407  | -0.833217 |
| 58 | 6 | 0 | -1.501994 | -2.762915 | 1.715815  | 32 | 1  | 0 | 3.710392  | 2.184496  | 0.759549  |
| 59 | 6 | 0 | -2.290951 | -3.727550 | 0.819307  | 33 | 1  | 0 | 2.370734  | 1.207677  | 1.368093  |
| 60 | 6 | 0 | -0.726944 | -3.223540 | -1.076329 | 34 | 1  | 0 | 2.485800  | 3.456385  | 2.368027  |
| 61 | 6 | 0 | -1.429163 | -4.330722 | -0.287823 | 35 | 6  | 0 | 0.496498  | 3.216488  | 1.640113  |
| 62 | 1 | 0 | 0.038401  | -1.309110 | 1.694707  | 36 | 1  | 0 | 3.357288  | 4.676171  | 0.355635  |
| 63 | 1 | 0 | -0.772235 | -3.341936 | 2.288465  | 37 | 1  | 0 | 3.246271  | 3.266790  | -1.759486 |
| 64 | 1 | 0 | -2.157501 | -2.291669 | 2.452639  | 38 | 1  | 0 | 1.668815  | 2.787218  | -2.413662 |
| 65 | 1 | 0 | -3.138420 | -3.220811 | 0.351277  | 39 | 6  | 0 | 0.073257  | 4.151267  | -0.600581 |
| 66 | 1 | 0 | -2.706857 | -4.522191 | 1.446878  | 40 | 1  | 0 | 1.734063  | 5.119028  | -1.518154 |
| 67 | 1 | 0 | -2.045747 | -4.920919 | -0.970894 | 41 | 7  | 0 | -0.265551 | 3.101881  | 0.382870  |
| 68 | 1 | 0 | -0.685011 | -5.012161 | 0.139477  | 42 | 1  | 0 | 0.180205  | 4.100715  | 2.215004  |
| 69 | 1 | 0 | -1.459297 | -2.584865 | -1.581114 | 43 | 1  | 0 | 0.287147  | 2.329999  | 2.252592  |
| 70 | 1 | 0 | -0.075960 | -3.646932 | -1.852570 | 44 | 1  | 0 | -0.293016 | 5.128894  | -0.251580 |
| 71 | 1 | 0 | 0.398048  | -0.936954 | -1.652349 | 45 | 1  | 0 | 1.886812  | 5.455035  | 0.965851  |
| 72 | 1 | 0 | 3.207712  | -0.802890 | 2.132983  | 46 | 1  | 0 | -0.444301 | 3.906103  | -1.532498 |
| 73 | 1 | 0 | 3.004880  | -2.444806 | 1.521473  | 47 | 1  | 0 | -1.252340 | 3.221660  | 0.608085  |
| 74 | 6 | 0 | 3.859450  | -1.923911 | -1.092115 | 48 | 6  | 0 | 1.870384  | 0.684756  | -1.173193 |
| 75 | 6 | 0 | 5.352302  | -2.189745 | -0.880765 | 49 | 8  | 0 | 1.618819  | 0.530050  | -2.369132 |
| 76 | 6 | 0 | 5.617783  | -2.731777 | 0.525353  | 50 | 6  | 0 | 1.851243  | -0.550503 | -0.264793 |
| 77 | 6 | 0 | 5.068313  | -1.788641 | 1.598582  | 51 | 6  | 0 | 3.298784  | -1.057724 | -0.035248 |
| 78 | 1 | 0 | 5.904576  | -1.251283 | -1.021823 | 52 | 7  | 0 | 0.932042  | -1.517772 | -0.959565 |
| 79 | 1 | 0 | 5.715003  | -2.892506 | -1.637318 | 53 | 1  | 0 | 3.927785  | -0.159046 | -0.120707 |
| 80 | 1 | 0 | 5.134590  | -3.713020 | 0.628405  | 54 | 6  | 0 | 3.544902  | -1.619739 | 1.369498  |
| 81 | 1 | 0 | 6.691304  | -2.888932 | 0.672309  | 55 | 1  | 0 | 1.384792  | -0.314641 | 0.688827  |
| 82 | 1 | 0 | 5.235936  | -2.207651 | 2.595987  | 56 | 6  | 0 | 0.037008  | -2.401933 | -0.100450 |
| 83 | 1 | 0 | 5.614739  | -0.836524 | 1.554599  | 57 | 6  | 0 | -0.764827 | -1.653089 | 0.995400  |
| 84 | 1 | 0 | 3.329958  | -2.885990 | -1.018506 | 58 | 6  | 0 | -1.582897 | -2.727183 | 1.754440  |
| 85 | 1 | 0 | 3.676180  | -1.514206 | -2.093567 | 59 | 6  | 0 | -2.402564 | -3.679692 | 0.872697  |
| 86 | 1 | 0 | -0.580929 | 1.709622  | -0.037029 | 60 | 6  | 0 | -0.837895 | -3.232710 | -1.039430 |
|    |   |   |           |           |           | 61 | 6  | 0 | -1.564054 | -4.313760 | -0.235726 |
|    |   |   |           |           |           | 62 | 1  | 0 | -0.012228 | -1.307072 | 1.709514  |
|    |   |   |           |           |           | 63 | 1  | 0 | -0.863849 | -3.318590 | 2.327544  |
|    |   |   |           |           |           | 64 | 1  | 0 | -2.217875 | -2.228553 | 2.491438  |
|    |   |   |           |           |           | 65 | 1  | 0 | -3.241424 | -3.157456 | 0.406146  |
|    |   |   |           |           |           | 66 | 1  | 0 | -2.832340 | -4.458570 | 1.510388  |
|    |   |   |           |           |           | 67 | 1  | 0 | -2.200313 | -4.893694 | -0.909364 |
|    |   |   |           |           |           | 68 | 1  | 0 | -0.834123 | -5.009953 | 0.191913  |
|    |   |   |           |           |           | 69 | 1  | 0 | -1.557591 | -2.577296 | -1.541806 |
|    |   |   |           |           |           | 70 | 1  | 0 | -0.204420 | -3.677907 | -1.817924 |
|    |   |   |           |           |           | 71 | 1  | 0 | 0.376128  | -0.989837 | -1.656664 |
|    |   |   |           |           |           | 72 | 1  | 0 | 3.193413  | -0.898625 | 2.118540  |
|    |   |   |           |           |           | 73 | 1  | 0 | 2.961703  | -2.536544 | 1.506149  |
|    |   |   |           |           |           | 74 | 6  | 0 | 3.797162  | -2.028926 | -1.111358 |
|    |   |   |           |           |           | 75 | 6  | 0 | 5.289011  | -2.313092 | -0.917179 |

### 3-IM5

Zero-point correction = 0.75641 a.u.

Thermal correction to Gibbs Free Energy = 0.68839 a.u.

Sum of electronic and zero-point Energies = -2237.22840 a.u.

Sum of electronic and thermal Free Energies = -2237.29641 a.u.

Standard orientation:

| Center Number | Atomic Number | Atomic Type | Coordinates (Angstroms) |           |           |
|---------------|---------------|-------------|-------------------------|-----------|-----------|
|               |               |             | X                       | Y         | Z         |
| 1             | 8             | 0           | 0.922890                | -3.210318 | 0.619864  |
| 2             | 1             | 0           | 1.492867                | -2.160532 | -1.530799 |
| 3             | 1             | 0           | 1.146305                | -3.998566 | 0.098898  |

|    |   |   |           |           |           |    |   |   |          |           |           |
|----|---|---|-----------|-----------|-----------|----|---|---|----------|-----------|-----------|
| 76 | 6 | 0 | 5.563354  | -2.857386 | 0.486322  | 50 | 6 | 0 | 3.557559 | -0.752522 | -0.917905 |
| 77 | 6 | 0 | 5.035195  | -1.908585 | 1.565293  | 51 | 6 | 0 | 2.303493 | -0.189006 | -0.233144 |
| 78 | 1 | 0 | 5.850930  | -1.381525 | -1.065713 | 52 | 7 | 0 | 2.686018 | 0.089754  | 1.158782  |
| 79 | 1 | 0 | 5.634425  | -3.020763 | -1.677231 | 53 | 6 | 0 | 5.914151 | -1.266201 | -0.551277 |
| 80 | 1 | 0 | 5.070915  | -3.833442 | 0.594337  | 54 | 6 | 0 | 5.996797 | -1.694893 | -1.871306 |
| 81 | 1 | 0 | 6.636594  | -3.025811 | 0.622227  | 55 | 6 | 0 | 4.873893 | -1.649163 | -2.704026 |
| 82 | 1 | 0 | 5.206481  | -2.330758 | 2.560714  | 56 | 6 | 0 | 3.648023 | -1.178383 | -2.240749 |
| 83 | 1 | 0 | 5.592911  | -0.963263 | 1.517556  | 57 | 8 | 0 | 4.438113 | -1.279454 | 2.480173  |
| 84 | 1 | 0 | 3.256383  | -2.983705 | -1.024597 | 58 | 1 | 0 | 2.784924 | -1.142047 | -2.898885 |
| 85 | 1 | 0 | 3.606479  | -1.621353 | -2.112171 | 59 | 1 | 0 | 4.958286 | -1.983651 | -3.732629 |
| 86 | 1 | 0 | -0.573862 | 1.467130  | -0.075940 | 60 | 1 | 0 | 6.939584 | -2.067082 | -2.256819 |

### 3-IM6

Zero-point correction = 0.75721 a.u.

Thermal correction to Gibbs Free Energy = 0.68870 a.u.

Sum of electronic and zero-point Energies = -2237.22982 a.u.

Sum of electronic and thermal Free Energies = -2237.29832 a.u.

Standard orientation:

| Center Number | Atomic Number | Atomic Type | Coordinates (Angstroms) |           |           |
|---------------|---------------|-------------|-------------------------|-----------|-----------|
|               |               |             | X                       | Y         | Z         |
| 1             | 1             | 0           | -0.476898               | 0.731777  | -1.105129 |
| 2             | 7             | 0           | -4.021423               | -0.129994 | -0.861994 |
| 3             | 6             | 0           | -4.874963               | 0.141409  | 0.297938  |
| 4             | 6             | 0           | -5.467025               | -1.135706 | 0.900261  |
| 5             | 6             | 0           | -6.183370               | -1.926642 | -0.196034 |
| 6             | 6             | 0           | -4.596019               | -1.000815 | -1.888119 |
| 7             | 6             | 0           | -5.132023               | -2.287361 | -1.248913 |
| 8             | 1             | 0           | -5.698900               | 0.785643  | -0.037534 |
| 9             | 1             | 0           | -4.322964               | 0.697677  | 1.056429  |
| 10            | 1             | 0           | -6.177339               | -0.821726 | 1.672408  |
| 11            | 6             | 0           | -4.426792               | -2.035103 | 1.570185  |
| 12            | 1             | 0           | -6.983402               | -1.326249 | -0.643778 |
| 13            | 1             | 0           | -5.415015               | -0.480885 | -2.402178 |
| 14            | 1             | 0           | -3.810881               | -1.210411 | -2.615362 |
| 15            | 6             | 0           | -4.052547               | -3.166376 | -0.601964 |
| 16            | 1             | 0           | -5.586840               | -2.876904 | -2.052156 |
| 17            | 7             | 0           | -3.441091               | -2.561332 | 0.605894  |
| 18            | 1             | 0           | -4.963418               | -2.858817 | 2.063458  |
| 19            | 1             | 0           | -3.881776               | -1.484812 | 2.346049  |
| 20            | 1             | 0           | -4.521567               | -4.127797 | -0.347689 |
| 21            | 1             | 0           | -6.635462               | -2.832123 | 0.223810  |
| 22            | 1             | 0           | -3.244836               | -3.365729 | -1.314554 |
| 23            | 1             | 0           | -2.940258               | -3.312653 | 1.080932  |
| 24            | 6             | 0           | -2.803546               | 0.401028  | -1.069789 |
| 25            | 8             | 0           | -2.221232               | 0.402045  | -2.153806 |
| 26            | 6             | 0           | -2.063959               | 0.968766  | 0.148425  |
| 27            | 6             | 0           | -2.219548               | 2.492356  | 0.301633  |
| 28            | 7             | 0           | -0.634232               | 0.606266  | -0.089102 |
| 29            | 1             | 0           | -3.301715               | 2.686313  | 0.277310  |
| 30            | 6             | 0           | -1.694108               | 2.974271  | 1.660858  |
| 31            | 1             | 0           | -2.370616               | 0.471660  | 1.068842  |
| 32            | 1             | 0           | -2.193188               | 2.424535  | 2.467227  |
| 33            | 1             | 0           | -0.616856               | 2.761671  | 1.748099  |
| 34            | 6             | 0           | -1.577047               | 3.274985  | -0.852205 |
| 35            | 6             | 0           | -1.780684               | 4.780694  | -0.672507 |
| 36            | 6             | 0           | -1.252619               | 5.257729  | 0.681298  |
| 37            | 6             | 0           | -1.903121               | 4.481234  | 1.826946  |
| 38            | 1             | 0           | -2.852584               | 5.007680  | -0.743210 |
| 39            | 1             | 0           | -1.286438               | 5.317528  | -1.488384 |
| 40            | 1             | 0           | -0.164070               | 5.109674  | 0.718160  |
| 41            | 1             | 0           | -1.431734               | 6.330733  | 0.802056  |
| 42            | 1             | 0           | -1.502151               | 4.808026  | 2.791475  |
| 43            | 1             | 0           | -2.980962               | 4.690944  | 1.839705  |
| 44            | 1             | 0           | -0.495018               | 3.068948  | -0.877802 |
| 45            | 1             | 0           | -1.982067               | 2.938470  | -1.811275 |
| 46            | 8             | 0           | -1.160751               | -1.661012 | -0.378236 |
| 47            | 1             | 0           | -2.030815               | -1.821197 | 0.126215  |
| 48            | 16            | 0           | 4.315681                | -0.203876 | 1.505942  |
| 49            | 6             | 0           | 4.681979                | -0.794811 | -0.114024 |

|    |   |   |           |           |           |
|----|---|---|-----------|-----------|-----------|
| 50 | 6 | 0 | 3.557559  | -0.752522 | -0.917905 |
| 51 | 6 | 0 | 2.303493  | -0.189006 | -0.233144 |
| 52 | 7 | 0 | 2.686018  | 0.089754  | 1.158782  |
| 53 | 6 | 0 | 5.914151  | -1.266201 | -0.551277 |
| 54 | 6 | 0 | 5.996797  | -1.694893 | -1.871306 |
| 55 | 6 | 0 | 4.873893  | -1.649163 | -2.704026 |
| 56 | 6 | 0 | 3.648023  | -1.178383 | -2.240749 |
| 57 | 8 | 0 | 4.438113  | -1.279454 | 2.480173  |
| 58 | 1 | 0 | 2.784924  | -1.142047 | -2.898885 |
| 59 | 1 | 0 | 4.958286  | -1.983651 | -3.732629 |
| 60 | 1 | 0 | 6.939584  | -2.067082 | -2.256819 |
| 61 | 1 | 0 | 6.773845  | -1.294687 | 0.110392  |
| 62 | 8 | 0 | 4.969483  | 1.061868  | 1.818365  |
| 63 | 6 | 0 | 2.072646  | 1.116357  | -1.027887 |
| 64 | 8 | 0 | 1.371582  | 1.178019  | -2.014262 |
| 65 | 8 | 0 | 2.787760  | 2.121325  | -0.551416 |
| 66 | 6 | 0 | 2.764018  | 3.336822  | -1.325928 |
| 67 | 1 | 0 | 3.144517  | 3.138825  | -2.329189 |
| 68 | 1 | 0 | 1.745664  | 3.726210  | -1.384557 |
| 69 | 1 | 0 | 3.412771  | 4.030068  | -0.795473 |
| 70 | 6 | 0 | -0.253429 | -0.855926 | 0.261250  |
| 71 | 6 | 0 | 1.122541  | -1.193961 | -0.384017 |
| 72 | 6 | 0 | 1.485286  | -2.627180 | 0.067510  |
| 73 | 6 | 0 | 1.447018  | -2.848359 | 1.582855  |
| 74 | 6 | 0 | -0.273691 | -1.011608 | 1.782305  |
| 75 | 6 | 0 | 0.092332  | -2.447820 | 2.163303  |
| 76 | 1 | 0 | 0.916127  | -1.224304 | -1.460137 |
| 77 | 1 | 0 | 0.755528  | -3.293087 | -0.402607 |
| 78 | 1 | 0 | 2.464410  | -2.901668 | -0.333249 |
| 79 | 1 | 0 | 2.242049  | -2.283648 | 2.077053  |
| 80 | 1 | 0 | 1.636696  | -3.907573 | 1.784658  |
| 81 | 1 | 0 | 0.094522  | -2.540748 | 3.252840  |
| 82 | 1 | 0 | -0.682857 | -3.123616 | 1.781657  |
| 83 | 1 | 0 | 0.432698  | -0.305831 | 2.230082  |
| 84 | 1 | 0 | -1.274227 | -0.773133 | 2.160177  |
| 85 | 1 | 0 | 2.471609  | 1.039359  | 1.461031  |
| 86 | 1 | 0 | -0.035279 | 1.258581  | 0.426030  |

### 4-IM1

Zero-point correction = 0.72612 a.u.

Thermal correction to Gibbs Free Energy = 0.65563 a.u.

Sum of electronic and zero-point Energies = -2160.82179 a.u.

Sum of electronic and thermal Free Energies = -2160.89229 a.u.

Standard orientation:

| Center Number | Atomic Number | Atomic Type | Coordinates (Angstroms) |           |           |
|---------------|---------------|-------------|-------------------------|-----------|-----------|
|               |               |             | X                       | Y         | Z         |
| 1             | 16            | 0           | 1.919234                | -1.250871 | -2.020259 |
| 2             | 6             | 0           | 3.403612                | -0.281831 | -1.914561 |
| 3             | 6             | 0           | 3.606742                | 0.052812  | -0.576203 |
| 4             | 6             | 0           | 2.527564                | -0.548571 | 0.251826  |
| 5             | 7             | 0           | 1.649504                | -1.284521 | -0.336494 |
| 6             | 6             | 0           | 4.231936                | 0.123320  | -2.940830 |
| 7             | 6             | 0           | 5.338958                | 0.899559  | -2.583469 |
| 8             | 6             | 0           | 5.573669                | 1.235141  | -1.251230 |
| 9             | 6             | 0           | 4.717046                | 0.818407  | -0.229254 |
| 10            | 8             | 0           | 0.840360                | -0.484505 | -2.626136 |
| 11            | 6             | 0           | 2.418086                | -0.492426 | 1.756418  |
| 12            | 8             | 0           | 1.543485                | -1.077365 | 2.354735  |
| 13            | 8             | 0           | 3.397023                | 0.192294  | 2.316327  |
| 14            | 6             | 0           | 3.440690                | 0.155213  | 3.757065  |
| 15            | 1             | 0           | 4.232750                | 0.843984  | 4.042265  |
| 16            | 1             | 0           | 2.483645                | 0.469410  | 4.175335  |
| 17            | 1             | 0           | 4.918140                | 1.080706  | 0.801231  |
| 18            | 1             | 0           | 6.443129                | 1.831940  | -0.997487 |
| 19            | 1             | 0           | 6.023227                | 1.239627  | -3.353235 |
| 20            | 1             | 0           | 4.040730                | -0.149914 | -3.973304 |
| 21            | 1             | 0           | 3.673811                | -0.860013 | 4.083583  |

|    |   |   |           |           |           | Number | Number | Type | X         | Y         | Z         |
|----|---|---|-----------|-----------|-----------|--------|--------|------|-----------|-----------|-----------|
| 22 | 8 | 0 | 2.169921  | -2.609918 | -2.469770 |        |        |      |           |           |           |
| 23 | 6 | 0 | 0.198774  | 3.126307  | 2.582957  |        |        |      |           |           |           |
| 24 | 6 | 0 | 1.712374  | 3.116121  | 2.395539  | 1      | 16     | 0    | 1.773088  | -1.158836 | -1.979300 |
| 25 | 1 | 0 | -0.060189 | 3.250444  | 3.638973  | 2      | 6      | 0    | 3.372000  | -0.393720 | -1.894204 |
| 26 | 1 | 0 | 2.164352  | 4.013584  | 2.829127  | 3      | 6      | 0    | 3.552002  | 0.073764  | -0.593956 |
| 27 | 1 | 0 | 2.124262  | 2.257268  | 2.936851  | 4      | 6      | 0    | 2.378072  | -0.320985 | 0.240721  |
| 28 | 1 | 0 | -0.233519 | 3.977792  | 2.041001  | 5      | 7      | 0    | 1.476888  | -1.086498 | -0.322993 |
| 29 | 6 | 0 | -0.418038 | 1.833101  | 2.051192  | 6      | 6      | 0    | 4.281392  | -0.201234 | -2.915709 |
| 30 | 1 | 0 | -1.507511 | 1.899188  | 2.103245  | 7      | 6      | 0    | 5.452649  | 0.488502  | -2.594188 |
| 31 | 1 | 0 | -0.125245 | 0.980531  | 2.683681  | 8      | 6      | 0    | 5.665460  | 0.955017  | -1.297459 |
| 32 | 7 | 0 | -3.142227 | -1.723729 | -0.156886 | 9      | 6      | 0    | 4.726641  | 0.756460  | -0.282358 |
| 33 | 6 | 0 | -3.524445 | -1.777559 | 1.250229  | 10     | 8      | 0    | 0.859796  | -0.259420 | -2.682952 |
| 34 | 6 | 0 | -2.596417 | -2.736383 | 2.012377  | 11     | 6      | 0    | 2.347967  | -0.288658 | 1.739633  |
| 35 | 6 | 0 | -2.667249 | -4.124420 | 1.362649  | 12     | 8      | 0    | 1.497810  | -0.865979 | 2.384447  |
| 36 | 6 | 0 | -3.199061 | -3.030000 | -0.813685 | 13     | 8      | 0    | 3.371477  | 0.365778  | 2.266834  |
| 37 | 6 | 0 | -2.232087 | -3.989496 | -0.103153 | 14     | 6      | 0    | 3.476234  | 0.303493  | 3.700731  |
| 38 | 1 | 0 | -4.555467 | -2.146227 | 1.308667  | 15     | 1      | 0    | 4.300793  | 0.963367  | 3.962438  |
| 39 | 1 | 0 | -3.506183 | -0.785203 | 1.696838  | 16     | 1      | 0    | 2.549353  | 0.639117  | 4.168316  |
| 40 | 1 | 0 | -2.937612 | -2.789550 | 3.049373  | 17     | 1      | 0    | 4.920303  | 1.112985  | 0.720758  |
| 41 | 6 | 0 | -1.149829 | -2.207002 | 1.988214  | 18     | 1      | 0    | 6.584303  | 1.483428  | -1.065831 |
| 42 | 1 | 0 | -3.695000 | -4.497986 | 1.404598  | 19     | 1      | 0    | 6.204122  | 0.653952  | -3.358554 |
| 43 | 1 | 0 | -4.222073 | -3.417086 | -0.746239 | 20     | 1      | 0    | 4.100394  | -0.578442 | -3.917056 |
| 44 | 1 | 0 | -2.935380 | -2.897106 | -1.861658 | 21     | 1      | 0    | 3.691652  | -0.722559 | 4.005020  |
| 45 | 6 | 0 | -0.789844 | -3.438098 | -0.192052 | 22     | 8      | 0    | 1.819682  | -2.555621 | -2.386692 |
| 46 | 1 | 0 | -2.275836 | -4.962409 | -0.598782 | 23     | 6      | 0    | 0.241679  | 3.268581  | 2.414794  |
| 47 | 7 | 0 | -0.250371 | -3.078005 | 1.160866  | 24     | 6      | 0    | 1.760729  | 3.217746  | 2.301337  |
| 48 | 1 | 0 | -0.704324 | -2.170514 | 2.981777  | 25     | 1      | 0    | -0.063556 | 3.452885  | 3.449047  |
| 49 | 1 | 0 | -1.070396 | -1.212565 | 1.538931  | 26     | 1      | 0    | 2.207782  | 4.141163  | 2.681871  |
| 50 | 1 | 0 | -0.093043 | -4.162716 | -0.613968 | 27     | 1      | 0    | 2.130903  | 2.402097  | 2.931237  |
| 51 | 1 | 0 | -2.043339 | -4.846323 | 1.900370  | 28     | 1      | 0    | -0.149152 | 4.096281  | 1.809012  |
| 52 | 1 | 0 | 0.631991  | -2.559915 | 1.028633  | 29     | 6      | 0    | -0.381224 | 1.958702  | 1.928652  |
| 53 | 1 | 0 | -0.740274 | -2.522926 | -0.788556 | 30     | 1      | 0    | -1.468449 | 2.037408  | 1.964523  |
| 54 | 1 | 0 | -0.025630 | -3.931799 | 1.679629  | 31     | 1      | 0    | -0.098972 | 1.132059  | 2.598852  |
| 55 | 6 | 0 | -2.516171 | -0.701462 | -0.805747 | 32     | 7      | 0    | -3.027956 | -1.737519 | -0.099484 |
| 56 | 8 | 0 | -2.151775 | -0.801781 | -1.974590 | 33     | 6      | 0    | -3.430206 | -1.729462 | 1.303293  |
| 57 | 6 | 0 | -2.194566 | 0.613652  | -0.085687 | 34     | 6      | 0    | -2.508117 | -2.655606 | 2.110995  |
| 58 | 6 | 0 | -2.907363 | 1.764974  | -0.823945 | 35     | 6      | 0    | -2.579454 | -4.073096 | 1.529764  |
| 59 | 7 | 0 | -0.730833 | 0.672219  | -0.122654 | 36     | 6      | 0    | -3.100145 | -3.071217 | -0.699104 |
| 60 | 1 | 0 | -2.502937 | 1.781297  | -1.846499 | 37     | 6      | 0    | -2.150183 | -4.011541 | 0.057300  |
| 61 | 6 | 0 | -4.417450 | 1.498596  | -0.907608 | 38     | 1      | 0    | -4.462323 | -2.094109 | 1.363151  |
| 62 | 1 | 0 | -2.518198 | 0.605843  | 0.954425  | 39     | 1      | 0    | -3.417487 | -0.719206 | 1.708109  |
| 63 | 6 | 0 | 0.034447  | 1.546952  | 0.637747  | 40     | 1      | 0    | -2.848947 | -2.657977 | 3.149390  |
| 64 | 6 | 0 | 1.199581  | 2.048470  | 0.161292  | 41     | 6      | 0    | -1.062398 | -2.130749 | 2.064466  |
| 65 | 6 | 0 | 2.081588  | 3.007525  | 0.915867  | 42     | 1      | 0    | -3.605458 | -4.447601 | 1.597020  |
| 66 | 1 | 0 | 3.135111  | 2.714024  | 0.815080  | 43     | 1      | 0    | -4.130286 | -3.436178 | -0.620532 |
| 67 | 1 | 0 | 2.006266  | 3.998634  | 0.445200  | 44     | 1      | 0    | -2.829076 | -2.990122 | -1.750700 |
| 68 | 1 | 0 | 1.451171  | 1.855247  | -0.881991 | 45     | 6      | 0    | -0.702621 | -3.488258 | -0.064289 |
| 69 | 1 | 0 | -0.389111 | 0.527765  | -1.071889 | 46     | 1      | 0    | -2.210761 | -5.005356 | -0.392776 |
| 70 | 1 | 0 | -4.607092 | 0.544584  | -1.413145 | 47     | 7      | 0    | -0.158799 | -3.014047 | 1.252231  |
| 71 | 1 | 0 | -4.818145 | 1.406861  | 0.113694  | 48     | 1      | 0    | -0.612474 | -2.076279 | 3.054565  |
| 72 | 6 | 0 | -2.651423 | 3.126547  | -0.168583 | 49     | 1      | 0    | -0.982483 | -1.139512 | 1.609044  |
| 73 | 6 | 0 | -3.374768 | 4.251843  | -0.913536 | 50     | 1      | 0    | -0.012417 | -4.256662 | -0.413051 |
| 74 | 6 | 0 | -4.877639 | 3.982459  | -0.992685 | 51     | 1      | 0    | -1.946531 | -4.761939 | 2.100329  |
| 75 | 6 | 0 | -5.150290 | 2.624871  | -1.640832 | 52     | 1      | 0    | 0.694530  | -2.465662 | 1.057286  |
| 76 | 1 | 0 | -2.966584 | 4.328646  | -1.930316 | 53     | 1      | 0    | -0.636057 | -2.636777 | -0.744891 |
| 77 | 1 | 0 | -3.181945 | 5.209913  | -0.419072 | 54     | 1      | 0    | 0.115749  | -3.823421 | 1.815409  |
| 78 | 1 | 0 | -5.297734 | 3.987964  | 0.022863  | 55     | 6      | 0    | -2.372573 | -0.754700 | -0.776136 |
| 79 | 1 | 0 | -5.380877 | 4.779286  | -1.550489 | 56     | 8      | 0    | -1.962725 | -0.910169 | -1.922932 |
| 80 | 1 | 0 | -6.225596 | 2.418282  | -1.662528 | 57     | 6      | 0    | -2.124793 | 0.612006  | -0.124373 |
| 81 | 1 | 0 | -4.808414 | 2.648861  | -2.684273 | 58     | 6      | 0    | -2.973646 | 1.667677  | -0.865323 |
| 82 | 1 | 0 | -3.017039 | 3.095376  | 0.868882  | 59     | 7      | 0    | -0.692388 | 0.855373  | -0.267270 |
| 83 | 1 | 0 | -1.576829 | 3.335859  | -0.126906 | 60     | 1      | 0    | -2.630920 | 1.663943  | -1.910404 |
|    |   |   |           |           |           | 61     | 6      | 0    | -4.461204 | 1.290055  | -0.844206 |
|    |   |   |           |           |           | 62     | 1      | 0    | -2.381279 | 0.619405  | 0.932416  |
|    |   |   |           |           |           | 63     | 6      | 0    | 0.094818  | 1.608563  | 0.538197  |
|    |   |   |           |           |           | 64     | 6      | 0    | 1.358237  | 1.977037  | 0.121790  |
|    |   |   |           |           |           | 65     | 6      | 0    | 2.197746  | 2.992670  | 0.853637  |
|    |   |   |           |           |           | 66     | 1      | 0    | 3.256151  | 2.704802  | 0.822264  |
|    |   |   |           |           |           | 67     | 1      | 0    | 2.136027  | 3.943909  | 0.305426  |
|    |   |   |           |           |           | 68     | 1      | 0    | 1.587833  | 1.827644  | -0.931895 |
|    |   |   |           |           |           | 69     | 1      | 0    | -0.345110 | 0.647891  | -1.204192 |
|    |   |   |           |           |           | 70     | 1      | 0    | -4.610949 | 0.301475  | -1.293073 |

4-TS1  
Zero-point correction = 0.72615 a.u.  
Thermal correction to Gibbs Free Energy = 0.65779 a.u.  
Sum of electronic and zero-point Energies = -2160.82062 a.u.  
Sum of electronic and thermal Free Energies = -2160.88898 a.u.

Standard orientation:  
-----  
Center Atomic Atomic Coordinates (Angstroms)

|    |   |   |           |          |           |    |   |   |           |           |           |
|----|---|---|-----------|----------|-----------|----|---|---|-----------|-----------|-----------|
| 71 | 1 | 0 | -4.795205 | 1.222674 | 0.202679  | 48 | 1 | 0 | 0.160429  | 2.067213  | 2.925522  |
| 72 | 6 | 0 | -2.777390 | 3.072191 | -0.286673 | 49 | 1 | 0 | 0.777570  | 1.109406  | 1.587225  |
| 73 | 6 | 0 | -3.612096 | 4.105479 | -1.046897 | 50 | 1 | 0 | -0.247268 | 4.192940  | -0.563697 |
| 74 | 6 | 0 | -5.095050 | 3.732172 | -1.024945 | 51 | 1 | 0 | 1.374752  | 4.813264  | 2.084439  |
| 75 | 6 | 0 | -5.309805 | 2.326138 | -1.585669 | 52 | 1 | 0 | -0.886514 | 2.147478  | 0.658924  |
| 76 | 1 | 0 | -3.264318 | 4.153567 | -2.087514 | 53 | 1 | 0 | 0.525803  | 2.657152  | -0.917380 |
| 77 | 1 | 0 | -3.460291 | 5.099174 | -0.612630 | 54 | 1 | 0 | -0.681718 | 3.598478  | 1.546844  |
| 78 | 1 | 0 | -5.457903 | 3.767223 | 0.011600  | 55 | 6 | 0 | 2.418790  | 0.846224  | -0.710770 |
| 79 | 1 | 0 | -5.681584 | 4.461577 | -1.593392 | 56 | 8 | 0 | 2.083699  | 0.960898  | -1.885672 |
| 80 | 1 | 0 | -6.367594 | 2.048038 | -1.532064 | 57 | 6 | 0 | 2.276767  | -0.555620 | -0.093665 |
| 81 | 1 | 0 | -5.030495 | 2.315863 | -2.647703 | 58 | 6 | 0 | 3.207333  | -1.545007 | -0.816257 |
| 82 | 1 | 0 | -3.092813 | 3.069677 | 0.767319  | 59 | 7 | 0 | 0.865303  | -0.913195 | -0.306915 |
| 83 | 1 | 0 | -1.717252 | 3.351554 | -0.307975 | 60 | 1 | 0 | 2.907428  | -1.565340 | -1.873079 |

#### 4-IM2

Zero-point correction = 0.72858 a.u.

Thermal correction to Gibbs Free Energy = 0.66128 a.u.

Sum of electronic and zero-point Energies = -2160.84393 a.u.

Sum of electronic and thermal Free Energies = -2160.91123 a.u.

Standard orientation:

| Center<br>umber | Atomic<br>Number | Atomic<br>Type | Coordinates (Angstroms) |           |           |
|-----------------|------------------|----------------|-------------------------|-----------|-----------|
|                 |                  |                | X                       | Y         | Z         |
| 1               | 16               | 0              | -1.633309               | 0.969156  | -1.850657 |
| 2               | 6                | 0              | -3.268261               | 0.271973  | -1.885755 |
| 3               | 6                | 0              | -3.473290               | -0.390228 | -0.679709 |
| 4               | 6                | 0              | -2.221752               | -0.260291 | 0.221763  |
| 5               | 7                | 0              | -1.444226               | 0.863964  | -0.267309 |
| 6               | 6                | 0              | -4.190877               | 0.301961  | -2.917431 |
| 7               | 6                | 0              | -5.398449               | -0.363748 | -2.714436 |
| 8               | 6                | 0              | -5.631681               | -1.037782 | -1.515910 |
| 9               | 6                | 0              | -4.679163               | -1.065594 | -0.494484 |
| 10              | 8                | 0              | -0.758129               | 0.030854  | -2.600688 |
| 11              | 6                | 0              | -2.538000               | 0.021900  | 1.689767  |
| 12              | 8                | 0              | -1.872247               | 0.755782  | 2.386348  |
| 13              | 8                | 0              | -3.597672               | -0.644872 | 2.131071  |
| 14              | 6                | 0              | -3.924108               | -0.456685 | 3.517607  |
| 15              | 1                | 0              | -4.775172               | -1.106967 | 3.709857  |
| 16              | 1                | 0              | -3.076566               | -0.735823 | 4.147334  |
| 17              | 1                | 0              | -4.899302               | -1.584607 | 0.429940  |
| 18              | 1                | 0              | -6.578001               | -1.547805 | -1.366115 |
| 19              | 1                | 0              | -6.159246               | -0.354206 | -3.488315 |
| 20              | 1                | 0              | -3.982809               | 0.836278  | -3.839364 |
| 21              | 1                | 0              | -4.187174               | 0.586624  | 3.700149  |
| 22              | 8                | 0              | -1.590307               | 2.357578  | -2.319138 |
| 23              | 6                | 0              | -0.155389               | -3.156742 | 2.334447  |
| 24              | 6                | 0              | -1.664730               | -3.181098 | 2.135812  |
| 25              | 1                | 0              | 0.109758                | -3.348778 | 3.377058  |
| 26              | 1                | 0              | -2.068811               | -4.157827 | 2.417016  |
| 27              | 1                | 0              | -2.125791               | -2.443226 | 2.801051  |
| 28              | 1                | 0              | 0.320246                | -3.935638 | 1.726450  |
| 29              | 6                | 0              | 0.410922                | -1.785222 | 1.938197  |
| 30              | 1                | 0              | 1.489087                | -1.755534 | 2.088635  |
| 31              | 1                | 0              | -0.043747               | -1.014045 | 2.579112  |
| 32              | 7                | 0              | 2.903330                | 1.874528  | 0.028846  |
| 33              | 6                | 0              | 3.161264                | 1.903070  | 1.467533  |
| 34              | 6                | 0              | 2.096307                | 2.760094  | 2.167984  |
| 35              | 6                | 0              | 2.119433                | 4.179415  | 1.590550  |
| 36              | 6                | 0              | 2.932820                | 3.213338  | -0.568939 |
| 37              | 6                | 0              | 1.848871                | 4.082589  | 0.084945  |
| 38              | 1                | 0              | 4.153437                | 2.342264  | 1.622320  |
| 39              | 1                | 0              | 3.178838                | 0.897718  | 1.884722  |
| 40              | 1                | 0              | 2.333919                | 2.784181  | 3.234834  |
| 41              | 6                | 0              | 0.707194                | 2.124976  | 1.986298  |
| 42              | 1                | 0              | 3.100288                | 4.633854  | 1.762832  |
| 43              | 1                | 0              | 3.924034                | 3.646989  | -0.396404 |
| 44              | 1                | 0              | 2.768137                | 3.113599  | -1.640705 |
| 45              | 6                | 0              | 0.463340                | 3.461012  | -0.180690 |
| 46              | 1                | 0              | 1.886917                | 5.075982  | -0.369334 |
| 47              | 7                | 0              | -0.180830               | 2.868162  | 1.037859  |

|    |   |   |           |           |           |
|----|---|---|-----------|-----------|-----------|
| 61 | 6 | 0 | 4.657250  | -1.050178 | -0.725796 |
| 62 | 1 | 0 | 2.486970  | -0.580550 | 0.970859  |
| 63 | 6 | 0 | 0.032107  | -1.425890 | 0.536229  |
| 64 | 6 | 0 | -1.388537 | -1.630849 | 0.073786  |
| 65 | 6 | 0 | -2.019037 | -2.902541 | 0.675551  |
| 66 | 1 | 0 | -3.101660 | -2.860739 | 0.536560  |
| 67 | 1 | 0 | -1.664525 | -3.747457 | 0.074327  |
| 68 | 1 | 0 | -1.345486 | -1.756092 | -1.012202 |
| 69 | 1 | 0 | 0.501880  | -0.643521 | -1.240944 |
| 70 | 1 | 0 | 4.751525  | -0.063410 | -1.192719 |
| 71 | 1 | 0 | 4.924846  | -0.935321 | 0.335741  |
| 72 | 6 | 0 | 3.080466  | -2.951915 | -0.222291 |
| 73 | 6 | 0 | 4.044092  | -3.929952 | -0.897768 |
| 74 | 6 | 0 | 5.487675  | -3.435995 | -0.798151 |
| 75 | 6 | 0 | 5.621737  | -2.033733 | -1.391976 |
| 76 | 1 | 0 | 3.768002  | -4.030579 | -1.955919 |
| 77 | 1 | 0 | 3.942694  | -4.921227 | -0.444388 |
| 78 | 1 | 0 | 5.789073  | -3.412244 | 0.258153  |
| 79 | 1 | 0 | 6.163444  | -4.130442 | -1.307930 |
| 80 | 1 | 0 | 6.648559  | -1.668391 | -1.290194 |
| 81 | 1 | 0 | 5.401136  | -2.073876 | -2.466797 |
| 82 | 1 | 0 | 3.310388  | -2.900110 | 0.852730  |
| 83 | 1 | 0 | 2.051224  | -3.317197 | -0.318021 |

#### 4-IM3

Zero-point correction = 0.75221 a.u.

Thermal correction to Gibbs Free Energy = 0.68110 a.u.

Sum of electronic and zero-point Energies = -2237.22644 a.u.

Sum of electronic and thermal Free Energies = -2237.29754 a.u.

Standard orientation:

| Center<br>Number | Atomic<br>Number | Atomic<br>Type | Coordinates (Angstroms) |           |           |
|------------------|------------------|----------------|-------------------------|-----------|-----------|
|                  |                  |                | X                       | Y         | Z         |
| 1                | 8                | 0              | 0.628944                | -4.048959 | -0.678389 |
| 2                | 1                | 0              | 0.783409                | -5.000926 | -0.611525 |
| 3                | 1                | 0              | 1.075518                | -3.788229 | -1.495896 |
| 4                | 6                | 0              | 0.018236                | -3.189571 | 2.471300  |
| 5                | 6                | 0              | -1.497691               | -3.175106 | 2.319692  |
| 6                | 1                | 0              | 0.307862                | -3.310605 | 3.518249  |
| 7                | 1                | 0              | -1.926536               | -4.102639 | 2.710329  |
| 8                | 1                | 0              | -1.910427               | -2.359965 | 2.925707  |
| 9                | 1                | 0              | 0.444714                | -4.025068 | 1.906210  |
| 10               | 6                | 0              | 0.620795                | -1.878791 | 1.951577  |
| 11               | 1                | 0              | 1.708783                | -1.892923 | 2.023535  |
| 12               | 1                | 0              | 0.253452                | -1.042843 | 2.566639  |
| 13               | 7                | 0              | 1.899050                | 2.129147  | -0.091835 |
| 14               | 6                | 0              | 2.437895                | 2.352425  | 1.255936  |
| 15               | 6                | 0              | 1.662425                | 3.443713  | 1.996166  |
| 16               | 6                | 0              | 1.661537                | 4.728652  | 1.167943  |
| 17               | 6                | 0              | 1.666632                | 3.328676  | -0.913673 |
| 18               | 6                | 0              | 0.927923                | 4.419837  | -0.138061 |
| 19               | 1                | 0              | 3.490349                | 2.660225  | 1.182055  |
| 20               | 1                | 0              | 2.395458                | 1.427834  | 1.831610  |
| 21               | 1                | 0              | 2.171814                | 3.603970  | 2.951545  |
| 22               | 6                | 0              | 0.229228                | 3.041580  | 2.337011  |
| 23               | 1                | 0              | 2.689815                | 5.043257  | 0.960577  |

|                                                                |        |        |                         |           |           | Number | Number | Type | X         | Y         | Z         |
|----------------------------------------------------------------|--------|--------|-------------------------|-----------|-----------|--------|--------|------|-----------|-----------|-----------|
| 24                                                             | 1      | 0      | 2.629806                | 3.721428  | -1.267564 |        |        |      |           |           |           |
| 25                                                             | 1      | 0      | 1.084346                | 3.014058  | -1.781594 |        |        |      |           |           |           |
| 26                                                             | 6      | 0      | -0.528624               | 4.063480  | 0.156384  | 1      | 8      | 0    | 0.396960  | -3.520636 | -0.873241 |
| 27                                                             | 1      | 0      | 0.902668                | 5.305153  | -0.780793 | 2      | 1      | 0    | -0.327031 | -3.804176 | -1.470899 |
| 28                                                             | 7      | 0      | -0.643141               | 2.927159  | 1.125975  | 3      | 1      | 0    | 1.099179  | -2.790296 | -1.361875 |
| 29                                                             | 1      | 0      | -0.220420               | 3.806370  | 2.975753  | 4      | 6      | 0    | -0.236143 | -3.735007 | 1.906066  |
| 30                                                             | 1      | 0      | 0.179949                | 2.079404  | 2.847935  | 5      | 6      | 0    | -1.742683 | -3.504993 | 1.847199  |
| 31                                                             | 1      | 0      | -1.035334               | 4.919545  | 0.609245  | 6      | 1      | 0    | 0.085653  | -3.901125 | 2.937505  |
| 32                                                             | 1      | 0      | 1.162449                | 5.538261  | 1.710942  | 7      | 1      | 0    | -2.274300 | -4.402693 | 2.176296  |
| 33                                                             | 1      | 0      | -1.061719               | 3.751199  | -0.745419 | 8      | 1      | 0    | -2.008929 | -2.714730 | 2.554888  |
| 34                                                             | 1      | 0      | -1.614610               | 2.878381  | 1.446411  | 9      | 1      | 0    | 0.030762  | -4.631625 | 1.336178  |
| 35                                                             | 6      | 0      | 2.077952                | 0.976217  | -0.795127 | 10     | 6      | 0    | 0.528537  | -2.538418 | 1.336484  |
| 36                                                             | 8      | 0      | 2.007353                | 0.927186  | -2.014730 | 11     | 1      | 0    | 1.601783  | -2.744233 | 1.329223  |
| 37                                                             | 6      | 0      | 2.254099                | -0.366743 | -0.057021 | 12     | 1      | 0    | 0.360517  | -1.645211 | 1.947373  |
| 38                                                             | 6      | 0      | 3.439240                | -1.146168 | -0.638512 | 13     | 7      | 0    | 1.870236  | 1.938934  | -0.056102 |
| 39                                                             | 7      | 0      | 0.965147                | -1.031377 | -0.309560 | 14     | 6      | 0    | 2.490729  | 1.993082  | 1.270129  |
| 40                                                             | 1      | 0      | 3.215345                | -1.330458 | -1.698442 | 15     | 6      | 0    | 1.835198  | 3.054440  | 2.159506  |
| 41                                                             | 6      | 0      | 4.716622                | -0.300256 | -0.553380 | 16     | 6      | 0    | 1.864787  | 4.412511  | 1.455198  |
| 42                                                             | 1      | 0      | 2.377830                | -0.256687 | 1.017496  | 17     | 6      | 0    | 1.712212  | 3.228856  | -0.743566 |
| 43                                                             | 6      | 0      | 0.183937                | -1.592898 | 0.550755  | 18     | 6      | 0    | 1.055000  | 4.265740  | 0.167063  |
| 44                                                             | 6      | 0      | -1.237125               | -1.841701 | 0.123921  | 19     | 1      | 0    | 3.555516  | 2.243669  | 1.163884  |
| 45                                                             | 6      | 0      | -1.892611               | -3.028111 | 0.849922  | 20     | 1      | 0    | 2.422652  | 1.016688  | 1.751690  |
| 46                                                             | 1      | 0      | -2.977722               | -2.957603 | 0.747584  | 21     | 1      | 0    | 2.408833  | 3.092208  | 3.090847  |
| 47                                                             | 1      | 0      | -1.578985               | -3.930194 | 0.317561  | 22     | 6      | 0    | 0.400960  | 2.708282  | 2.545812  |
| 48                                                             | 1      | 0      | -1.211652               | -2.055038 | -0.949224 | 23     | 1      | 0    | 2.896857  | 4.694099  | 1.220918  |
| 49                                                             | 1      | 0      | 4.582861                | 0.645060  | -1.091673 | 24     | 1      | 0    | 2.698116  | 3.597841  | -1.061738 |
| 50                                                             | 1      | 0      | 4.908115                | -0.053203 | 0.501766  | 25     | 1      | 0    | 1.103708  | 3.050257  | -1.630240 |
| 51                                                             | 6      | 0      | 3.640075                | -2.485143 | 0.079381  | 26     | 6      | 0    | -0.400251 | 3.931016  | 0.498420  |
| 52                                                             | 6      | 0      | 4.832147                | -3.246886 | -0.504699 | 27     | 1      | 0    | 1.033469  | 5.212313  | -0.382148 |
| 53                                                             | 6      | 0      | 6.108673                | -2.407580 | -0.429878 | 28     | 7      | 0    | -0.513699 | 2.707023  | 1.360133  |
| 54                                                             | 6      | 0      | 5.917529                | -1.058413 | -1.124235 | 29     | 1      | 0    | 0.013466  | 3.461539  | 3.237222  |
| 55                                                             | 1      | 0      | 4.621359                | -3.493553 | -1.554177 | 30     | 1      | 0    | 0.320459  | 1.724532  | 3.006506  |
| 56                                                             | 1      | 0      | 4.964904                | -4.195557 | 0.025744  | 31     | 1      | 0    | -0.852047 | 4.753106  | 1.059797  |
| 57                                                             | 1      | 0      | 6.364373                | -2.237218 | 0.624931  | 32     | 1      | 0    | 1.438670  | 5.189080  | 2.099525  |
| 58                                                             | 1      | 0      | 6.948049                | -2.948427 | -0.879091 | 33     | 1      | 0    | -0.983098 | 3.726866  | -0.401688 |
| 59                                                             | 1      | 0      | 6.821200                | -0.447443 | -1.031742 | 34     | 1      | 0    | -1.475785 | 2.653554  | 1.706793  |
| 60                                                             | 1      | 0      | 5.752685                | -1.224866 | -2.196995 | 35     | 6      | 0    | 1.844027  | 0.834554  | -0.855819 |
| 61                                                             | 1      | 0      | 3.833694                | -2.285406 | 1.144203  | 36     | 8      | 0    | 1.664013  | 0.911257  | -2.065185 |
| 62                                                             | 1      | 0      | 2.729176                | -3.091742 | 0.022379  | 37     | 6      | 0    | 2.050340  | -0.576459 | -0.283407 |
| 63                                                             | 1      | 0      | 0.582331                | -0.848745 | -1.253591 | 38     | 6      | 0    | 3.444565  | -1.064655 | -0.733219 |
| 64                                                             | 16     | 0      | -1.464933               | 0.726231  | -1.914641 | 39     | 7      | 0    | 0.991688  | -1.427560 | -0.884620 |
| 65                                                             | 6      | 0      | -3.113646               | 0.059275  | -1.912512 | 40     | 1      | 0    | 3.404396  | -1.107199 | -1.831631 |
| 66                                                             | 6      | 0      | -3.304463               | -0.582058 | -0.692443 | 41     | 6      | 0    | 4.546459  | -0.073568 | -0.333858 |
| 67                                                             | 6      | 0      | -2.043963               | -0.439305 | 0.194363  | 42     | 1      | 0    | 1.966580  | -0.615149 | 0.802256  |
| 68                                                             | 7      | 0      | -1.257734               | 0.660292  | -0.337296 | 43     | 6      | 0    | 0.068646  | -2.225891 | -0.072695 |
| 69                                                             | 6      | 0      | -4.050023               | 0.074251  | -2.932206 | 44     | 6      | 0    | -1.445878 | -1.990384 | -0.241892 |
| 70                                                             | 6      | 0      | -5.257559               | -0.582546 | -2.702131 | 45     | 6      | 0    | -2.210903 | -3.153838 | 0.429931  |
| 71                                                             | 6      | 0      | -5.477247               | -1.235183 | -1.489221 | 46     | 1      | 0    | -3.279262 | -2.927552 | 0.424936  |
| 72                                                             | 6      | 0      | -4.511539               | -1.248053 | -0.480353 | 47     | 1      | 0    | -2.098409 | -4.047113 | -0.197281 |
| 73                                                             | 8      | 0      | -0.635358               | -0.251646 | -2.665591 | 48     | 1      | 0    | -1.633010 | -2.024176 | -1.323955 |
| 74                                                             | 6      | 0      | -2.343825               | -0.100273 | 1.654858  | 49     | 1      | 0    | 4.328604  | 0.925255  | -0.730805 |
| 75                                                             | 8      | 0      | -1.614681               | 0.584312  | 2.342328  | 50     | 1      | 0    | 4.569253  | 0.010681  | 0.762563  |
| 76                                                             | 8      | 0      | -3.460313               | -0.651817 | 2.110045  | 51     | 6      | 0    | 3.792669  | -2.458252 | -0.199679 |
| 77                                                             | 6      | 0      | -3.778279               | -0.384065 | 3.485882  | 52     | 6      | 0    | 5.157845  | -2.924931 | -0.711497 |
| 78                                                             | 1      | 0      | -4.674060               | -0.963675 | 3.698938  | 53     | 6      | 0    | 6.257054  | -1.932966 | -0.331527 |
| 79                                                             | 1      | 0      | -2.955521               | -0.692584 | 4.134093  | 54     | 6      | 0    | 5.917805  | -0.530275 | -0.835529 |
| 80                                                             | 1      | 0      | -4.724036               | -1.748133 | 0.456141  | 55     | 1      | 0    | 5.115664  | -3.018631 | -1.804773 |
| 81                                                             | 1      | 0      | -6.422741               | -1.740158 | -1.318235 | 56     | 1      | 0    | 5.383248  | -3.919747 | -0.313705 |
| 82                                                             | 1      | 0      | -6.028089               | -0.584684 | -3.466435 | 57     | 1      | 0    | 6.357570  | -1.909084 | 0.762283  |
| 83                                                             | 1      | 0      | -3.851469               | 0.589256  | -3.867128 | 58     | 1      | 0    | 7.221582  | -2.260397 | -0.733503 |
| 84                                                             | 1      | 0      | -3.968900               | 0.682169  | 3.621580  | 59     | 1      | 0    | 6.684301  | 0.185957  | -0.521850 |
| 85                                                             | 8      | 0      | -1.392121               | 2.106609  | -2.415385 | 60     | 1      | 0    | 5.910993  | -0.531932 | -1.933615 |
| 86                                                             | 1      | 0      | -0.545101               | 2.005742  | 0.617560  | 61     | 1      | 0    | 3.813046  | -2.421346 | 0.899799  |
|                                                                |        |        |                         |           |           | 62     | 1      | 0    | 3.025660  | -3.189825 | -0.480638 |
|                                                                |        |        |                         |           |           | 63     | 1      | 0    | 0.490731  | -0.891130 | -1.606682 |
| <b>4-TS2</b>                                                   |        |        |                         |           |           | 64     | 16     | 0    | -1.475694 | 0.870649  | -1.839926 |
| Zero-point correction = 0.75158 a.u.                           |        |        |                         |           |           | 65     | 6      | 0    | -3.200742 | 0.487110  | -1.655681 |
| Thermal correction to Gibbs Free Energy = 0.68527 a.u.         |        |        |                         |           |           | 66     | 6      | 0    | -3.337351 | -0.323752 | -0.536189 |
| Sum of electronic and zero-point Energies = -2237.175179 a.u.  |        |        |                         |           |           | 67     | 6      | 0    | -1.954801 | -0.536867 | 0.148009  |
| Sum of electronic and thermal Free Energies = -2237.24150 a.u. |        |        |                         |           |           | 68     | 7      | 0    | -1.056403 | 0.504853  | -0.344198 |
| Standard orientation:                                          |        |        |                         |           |           | 69     | 6      | 0    | -4.248035 | 0.843460  | -2.489761 |
| -----                                                          |        |        |                         |           |           | 70     | 6      | 0    | -5.515143 | 0.363577  | -2.168020 |
| Center                                                         | Atomic | Atomic | Coordinates (Angstroms) |           |           |        |        |      |           |           |           |

|    |   |   |           |           |           |    |    |   |           |           |           |
|----|---|---|-----------|-----------|-----------|----|----|---|-----------|-----------|-----------|
| 71 | 6 | 0 | -5.684753 | -0.458858 | -1.053954 | 43 | 6  | 0 | 0.133273  | -2.485639 | -0.431724 |
| 72 | 6 | 0 | -4.609965 | -0.813528 | -0.235964 | 44 | 6  | 0 | -1.365535 | -2.073963 | -0.372147 |
| 73 | 8 | 0 | -0.967273 | -0.076603 | -2.861897 | 45 | 6  | 0 | -2.136490 | -3.253762 | 0.264447  |
| 74 | 6 | 0 | -2.030161 | -0.346045 | 1.666986  | 46 | 1  | 0 | -3.186636 | -2.978801 | 0.377933  |
| 75 | 8 | 0 | -1.122435 | 0.104820  | 2.332070  | 47 | 1  | 0 | -2.114771 | -4.082643 | -0.450973 |
| 76 | 8 | 0 | -3.188092 | -0.725322 | 2.193124  | 48 | 1  | 0 | -1.677833 | -2.006311 | -1.423674 |
| 77 | 6 | 0 | -3.305856 | -0.589898 | 3.617888  | 49 | 1  | 0 | 4.159737  | 1.165245  | -0.282338 |
| 78 | 1 | 0 | -4.274306 | -1.014792 | 3.874124  | 50 | 1  | 0 | 4.276552  | 0.054977  | 1.088319  |
| 79 | 1 | 0 | -2.501436 | -1.132008 | 4.118993  | 51 | 6  | 0 | 3.813613  | -2.287387 | -0.330649 |
| 80 | 1 | 0 | -4.789496 | -1.433139 | 0.633454  | 52 | 6  | 0 | 5.260645  | -2.581779 | -0.734268 |
| 81 | 1 | 0 | -6.675903 | -0.826180 | -0.807037 | 53 | 6  | 0 | 6.227120  | -1.613078 | -0.056110 |
| 82 | 1 | 0 | -6.369853 | 0.629473  | -2.781394 | 54 | 6  | 0 | 5.849087  | -0.169591 | -0.380497 |
| 83 | 1 | 0 | -4.081571 | 1.482033  | -3.352190 | 55 | 1  | 0 | 5.356231  | -2.488216 | -1.824140 |
| 84 | 1 | 0 | -3.265238 | 0.464590  | 3.897007  | 56 | 1  | 0 | 5.506653  | -3.617328 | -0.478666 |
| 85 | 8 | 0 | -1.248252 | 2.293398  | -2.139841 | 57 | 1  | 0 | 6.186588  | -1.764397 | 1.031158  |
| 86 | 1 | 0 | -0.427641 | 1.837051  | 0.767033  | 58 | 1  | 0 | 7.256008  | -1.817259 | -0.369521 |
|    |   |   |           |           |           | 59 | 1  | 0 | 6.513568  | 0.529752  | 0.137158  |
|    |   |   |           |           |           | 60 | 1  | 0 | 5.978197  | 0.004411  | -1.456994 |
|    |   |   |           |           |           | 61 | 1  | 0 | 3.706838  | -2.438403 | 0.752264  |
|    |   |   |           |           |           | 62 | 1  | 0 | 3.154283  | -3.010550 | -0.827289 |
|    |   |   |           |           |           | 63 | 1  | 0 | 0.442187  | -0.820366 | -1.730097 |
|    |   |   |           |           |           | 64 | 16 | 0 | -1.596954 | 0.805010  | -1.840148 |
|    |   |   |           |           |           | 65 | 6  | 0 | -3.269500 | 0.391083  | -1.396828 |
|    |   |   |           |           |           | 66 | 6  | 0 | -3.227574 | -0.382338 | -0.240966 |
|    |   |   |           |           |           | 67 | 6  | 0 | -1.756448 | -0.641791 | 0.180516  |
|    |   |   |           |           |           | 68 | 7  | 0 | -0.947631 | 0.414622  | -0.433379 |
|    |   |   |           |           |           | 69 | 6  | 0 | -4.438950 | 0.734827  | -2.056412 |
|    |   |   |           |           |           | 70 | 6  | 0 | -5.638787 | 0.283805  | -1.511188 |
|    |   |   |           |           |           | 71 | 6  | 0 | -5.630070 | -0.487872 | -0.348297 |
|    |   |   |           |           |           | 72 | 6  | 0 | -4.437582 | -0.831015 | 0.290871  |
|    |   |   |           |           |           | 73 | 8  | 0 | -1.182563 | -0.088166 | -2.947687 |
|    |   |   |           |           |           | 74 | 6  | 0 | -1.494983 | -0.534851 | 1.681954  |
|    |   |   |           |           |           | 75 | 8  | 0 | -0.405816 | -0.267344 | 2.145738  |
|    |   |   |           |           |           | 76 | 8  | 0 | -2.561762 | -0.775515 | 2.433044  |
|    |   |   |           |           |           | 77 | 6  | 0 | -2.351062 | -0.749315 | 3.854209  |
|    |   |   |           |           |           | 78 | 1  | 0 | -3.290010 | -1.077788 | 4.295327  |
|    |   |   |           |           |           | 79 | 1  | 0 | -1.537641 | -1.423908 | 4.128753  |
|    |   |   |           |           |           | 80 | 1  | 0 | -4.466651 | -1.418940 | 1.199738  |
|    |   |   |           |           |           | 81 | 1  | 0 | -6.570247 | -0.828283 | 0.074052  |
|    |   |   |           |           |           | 82 | 1  | 0 | -6.580295 | 0.536044  | -1.988056 |
|    |   |   |           |           |           | 83 | 1  | 0 | -4.416285 | 1.341979  | -2.956055 |
|    |   |   |           |           |           | 84 | 1  | 0 | -2.112086 | 0.265351  | 4.178749  |
|    |   |   |           |           |           | 85 | 8  | 0 | -1.447206 | 2.244231  | -2.107960 |
|    |   |   |           |           |           | 86 | 1  | 0 | -0.698456 | 2.038676  | 0.345597  |

#### 4-IM4

Zero-point correction = 0.75808 a.u.

Thermal correction to Gibbs Free Energy = 0.69089 a.u.

Sum of electronic and zero-point Energies = -2237.22345 a.u.

Sum of electronic and thermal Free Energies = -2237.29064 a.u.

Standard orientation:

| Center Number | Atomic Number | Atomic Type | Coordinates (Angstroms) |           |           |
|---------------|---------------|-------------|-------------------------|-----------|-----------|
|               |               |             | X                       | Y         | Z         |
| 1             | 8             | 0           | 0.249496                | -3.578761 | -1.300044 |
| 2             | 1             | 0           | -0.341543               | -3.460500 | -2.061994 |
| 3             | 1             | 0           | 1.610681                | -1.968110 | -1.749685 |
| 4             | 6             | 0           | -0.092566               | -4.129930 | 1.447841  |
| 5             | 6             | 0           | -1.564043               | -3.758677 | 1.591456  |
| 6             | 1             | 0           | 0.327640                | -4.425859 | 2.413398  |
| 7             | 1             | 0           | -2.144023               | -4.628812 | 1.914003  |
| 8             | 1             | 0           | -1.675769               | -3.006289 | 2.379458  |
| 9             | 1             | 0           | 0.011475                | -4.982366 | 0.769181  |
| 10            | 6             | 0           | 0.717406                | -2.952114 | 0.899257  |
| 11            | 1             | 0           | 1.749630                | -3.263464 | 0.737868  |
| 12            | 1             | 0           | 0.712182                | -2.135792 | 1.622549  |
| 13            | 7             | 0           | 1.699799                | 2.001274  | -0.059390 |
| 14            | 6             | 0           | 1.993557                | 1.959617  | 1.378061  |
| 15            | 6             | 0           | 1.269137                | 3.071503  | 2.150284  |
| 16            | 6             | 0           | 1.567705                | 4.429265  | 1.513931  |
| 17            | 6             | 0           | 1.746261                | 3.315535  | -0.717448 |
| 18            | 6             | 0           | 1.013831                | 4.385876  | 0.089092  |
| 19            | 1             | 0           | 3.072040                | 2.090253  | 1.536951  |
| 20            | 1             | 0           | 1.696039                | 0.990387  | 1.779890  |
| 21            | 1             | 0           | 1.646804                | 3.037016  | 3.176850  |
| 22            | 6             | 0           | -0.242727               | 2.874798  | 2.238607  |
| 23            | 1             | 0           | 2.647410                | 4.611966  | 1.493903  |
| 24            | 1             | 0           | 2.795849                | 3.616694  | -0.844559 |
| 25            | 1             | 0           | 1.297595                | 3.197911  | -1.703635 |
| 26            | 6             | 0           | -0.498037               | 4.172826  | 0.117796  |
| 27            | 1             | 0           | 1.180017                | 5.342185  | -0.416808 |
| 28            | 7             | 0           | -0.876571               | 2.938051  | 0.883650  |
| 29            | 1             | 0           | -0.687434               | 3.676877  | 2.833844  |
| 30            | 1             | 0           | -0.502315               | 1.911072  | 2.675650  |
| 31            | 1             | 0           | -0.981890               | 5.009036  | 0.629574  |
| 32            | 1             | 0           | 1.098135                | 5.233878  | 2.089842  |
| 33            | 1             | 0           | -0.914901               | 4.057779  | -0.882122 |
| 34            | 1             | 0           | -1.894328               | 2.947626  | 1.003799  |
| 35            | 6             | 0           | 1.699021                | 0.922240  | -0.882942 |
| 36            | 8             | 0           | 1.585584                | 1.015148  | -2.101881 |
| 37            | 6             | 0           | 1.949776                | -0.492000 | -0.336846 |
| 38            | 6             | 0           | 3.421331                | -0.845263 | -0.674486 |
| 39            | 7             | 0           | 1.030120                | -1.409981 | -1.113596 |
| 40            | 1             | 0           | 3.510737                | -0.713920 | -1.764067 |
| 41            | 6             | 0           | 4.396430                | 0.132854  | -0.001627 |
| 42            | 1             | 0           | 1.726398                | -0.608668 | 0.721242  |

#### 4-TS3

Zero-point correction = 0.75270 a.u.

Thermal correction to Gibbs Free Energy = 0.68550 a.u.

Sum of electronic and zero-point Energies = -2237.22363 a.u.

Sum of electronic and thermal Free Energies = -2237.29082 a.u.

Standard orientation:

| Center Number | Atomic Number | Atomic Type | Coordinates (Angstroms) |           |           |
|---------------|---------------|-------------|-------------------------|-----------|-----------|
|               |               |             | X                       | Y         | Z         |
| 1             | 8             | 0           | 0.331199                | -3.520498 | -1.407340 |
| 2             | 1             | 0           | -0.268763               | -3.362277 | -2.155146 |
| 3             | 1             | 0           | 1.768364                | -1.937480 | -1.729304 |
| 4             | 6             | 0           | 0.088555                | -4.165650 | 1.360174  |
| 5             | 6             | 0           | -1.370287               | -3.784480 | 1.581338  |
| 6             | 1             | 0           | 0.552854                | -4.488141 | 2.296321  |
| 7             | 1             | 0           | -1.940993               | -4.651773 | 1.926912  |
| 8             | 1             | 0           | -1.439837               | -3.034706 | 2.377416  |
| 9             | 1             | 0           | 0.147615                | -5.003588 | 0.658030  |
| 10            | 6             | 0           | 0.884808                | -2.985966 | 0.795717  |
| 11            | 1             | 0           | 1.898866                | -3.311647 | 0.564117  |
| 12            | 1             | 0           | 0.941170                | -2.191096 | 1.542083  |
| 13            | 7             | 0           | 1.563993                | 2.074300  | -0.121388 |
| 14            | 6             | 0           | 1.949157                | 2.106501  | 1.293814  |
| 15            | 6             | 0           | 1.122979                | 3.107357  | 2.109313  |
| 16            | 6             | 0           | 1.154671                | 4.479192  | 1.434369  |
| 17            | 6             | 0           | 1.313377                | 3.360811  | -0.790633 |

|    |    |   |           |           |           |                                                                |        |        |                         |           |           |
|----|----|---|-----------|-----------|-----------|----------------------------------------------------------------|--------|--------|-------------------------|-----------|-----------|
| 18 | 6  | 0 | 0.482172  | 4.309912  | 0.072796  | Zero-point correction = 0.75646 a.u.                           |        |        |                         |           |           |
| 19 | 1  | 0 | 3.003831  | 2.400511  | 1.373861  | Thermal correction to Gibbs Free Energy = 0.69008 a.u.         |        |        |                         |           |           |
| 20 | 1  | 0 | 1.839658  | 1.109618  | 1.723784  | Sum of electronic and zero-point Energies = -2237.22563 a.u.   |        |        |                         |           |           |
| 21 | 1  | 0 | 1.586533  | 3.157432  | 3.099950  | Sum of electronic and thermal Free Energies = -2237.29202 a.u. |        |        |                         |           |           |
| 22 | 6  | 0 | -0.327140 | 2.678811  | 2.319653  | Standard orientation:                                          |        |        |                         |           |           |
| 23 | 1  | 0 | 2.187115  | 4.825534  | 1.312312  | -----                                                          |        |        |                         |           |           |
| 24 | 1  | 0 | 2.275195  | 3.839229  | -1.022810 | Center                                                         | Atomic | Atomic | Coordinates (Angstroms) |           |           |
| 25 | 1  | 0 | 0.802157  | 3.140518  | -1.727944 | Number                                                         | Number | Type   | X                       | Y         | Z         |
| 26 | 6  | 0 | -0.968106 | 3.858930  | 0.262416  | -----                                                          |        |        |                         |           |           |
| 27 | 1  | 0 | 0.443857  | 5.266939  | -0.457851 | 1                                                              | 8      | 0      | 0.355562                | -3.592630 | -1.291088 |
| 28 | 7  | 0 | -1.066619 | 2.581331  | 1.030423  | 2                                                              | 1      | 0      | -0.225078               | -3.473353 | -2.061084 |
| 29 | 1  | 0 | -0.828402 | 3.428729  | 2.943938  | 3                                                              | 1      | 0      | 1.767524                | -2.010254 | -1.683130 |
| 30 | 1  | 0 | -0.381730 | 1.713725  | 2.822365  | 4                                                              | 6      | 0      | 0.059464                | -4.130880 | 1.474508  |
| 31 | 1  | 0 | -1.505017 | 4.632348  | 0.824561  | 5                                                              | 6      | 0      | -1.410891               | -3.763504 | 1.640206  |
| 32 | 1  | 0 | 0.619798  | 5.216105  | 2.043344  | 6                                                              | 1      | 0      | 0.498834                | -4.412646 | 2.435376  |
| 33 | 1  | 0 | -1.461941 | 3.706590  | -0.696586 | 7                                                              | 1      | 0      | -1.979630               | -4.628613 | 1.994093  |
| 34 | 1  | 0 | -2.056414 | 2.460317  | 1.263692  | 8                                                              | 1      | 0      | -1.513810               | -2.992364 | 2.412154  |
| 35 | 6  | 0 | 1.655209  | 0.993145  | -0.926822 | 9                                                              | 1      | 0      | 0.152076                | -4.991947 | 0.805074  |
| 36 | 8  | 0 | 1.505745  | 1.053089  | -2.147136 | 10                                                             | 6      | 0      | 0.855688                | -2.958220 | 0.896320  |
| 37 | 6  | 0 | 2.001342  | -0.396539 | -0.363726 | 11                                                             | 1      | 0      | 1.883738                | -3.270361 | 0.706592  |
| 38 | 6  | 0 | 3.495841  | -0.663993 | -0.680417 | 12                                                             | 1      | 0      | 0.875011                | -2.138279 | 1.614245  |
| 39 | 7  | 0 | 1.140540  | -1.373982 | -1.144322 | 13                                                             | 7      | 0      | 1.551914                | 2.036774  | -0.143419 |
| 40 | 1  | 0 | 3.591909  | -0.561494 | -1.772715 | 14                                                             | 6      | 0      | 1.965559                | 2.089244  | 1.266460  |
| 41 | 6  | 0 | 4.390302  | 0.401780  | -0.028263 | 15                                                             | 6      | 0      | 1.218999                | 3.151846  | 2.082096  |
| 42 | 1  | 0 | 1.770120  | -0.518550 | 0.692568  | 16                                                             | 6      | 0      | 1.290876                | 4.497240  | 1.358869  |
| 43 | 6  | 0 | 0.244546  | -2.466877 | -0.487553 | 17                                                             | 6      | 0      | 1.276766                | 3.309105  | -0.835555 |
| 44 | 6  | 0 | -1.261968 | -2.080553 | -0.373133 | 18                                                             | 6      | 0      | 0.539535                | 4.321722  | 0.040731  |
| 45 | 6  | 0 | -1.995992 | -3.273800 | 0.282816  | 19                                                             | 1      | 0      | 3.035356                | 2.329854  | 1.312840  |
| 46 | 1  | 0 | -3.044751 | -3.011553 | 0.434982  | 20                                                             | 1      | 0      | 1.815860                | 1.109562  | 1.723191  |
| 47 | 1  | 0 | -1.989135 | -4.095454 | -0.440764 | 21                                                             | 1      | 0      | 1.734827                | 3.210487  | 3.046599  |
| 48 | 1  | 0 | -1.611668 | -2.027106 | -1.410286 | 22                                                             | 6      | 0      | -0.244459               | 2.807600  | 2.362779  |
| 49 | 1  | 0 | 4.092297  | 1.402660  | -0.358379 | 23                                                             | 1      | 0      | 2.333014                | 4.783629  | 1.174094  |
| 50 | 1  | 0 | 4.249755  | 0.360262  | 1.061015  | 24                                                             | 1      | 0      | 2.230646                | 3.745867  | -1.163709 |
| 51 | 6  | 0 | 3.978784  | -2.063670 | -0.279802 | 25                                                             | 1      | 0      | 0.690361                | 3.070044  | -1.723401 |
| 52 | 6  | 0 | 5.458909  | -2.269239 | -0.615390 | 26                                                             | 6      | 0      | -0.918564               | 3.943990  | 0.325377  |
| 53 | 6  | 0 | 6.334121  | -1.210222 | 0.049695  | 27                                                             | 1      | 0      | 0.526633                | 5.262421  | -0.520124 |
| 54 | 6  | 0 | 5.869700  | 0.185825  | -0.356709 | 28                                                             | 7      | 0      | -1.009752               | 2.696604  | 1.109947  |
| 55 | 1  | 0 | 5.589776  | -2.214720 | -1.704367 | 29                                                             | 1      | 0      | -0.661801               | 3.601127  | 3.004160  |
| 56 | 1  | 0 | 5.763252  | -3.274552 | -0.307100 | 30                                                             | 1      | 0      | -0.315021               | 1.860832  | 2.902104  |
| 57 | 1  | 0 | 6.264916  | -1.314018 | 1.141072  | 31                                                             | 1      | 0      | -1.382348               | 4.778699  | 0.875227  |
| 58 | 1  | 0 | 7.384565  | -1.358301 | -0.220549 | 32                                                             | 1      | 0      | 0.826837                | 5.281246  | 1.967370  |
| 59 | 1  | 0 | 6.467494  | 0.954982  | 0.142718  | 33                                                             | 1      | 0      | -1.462670               | 3.800207  | -0.610442 |
| 60 | 1  | 0 | 6.018282  | 0.316328  | -1.436812 | 34                                                             | 1      | 0      | -1.990776               | 2.560038  | 1.355296  |
| 61 | 1  | 0 | 3.828110  | -2.196923 | 0.800431  | 35                                                             | 6      | 0      | 1.649411                | 0.950807  | -0.935956 |
| 62 | 1  | 0 | 3.402563  | -2.845520 | -0.787713 | 36                                                             | 8      | 0      | 1.474098                | 0.990636  | -2.156163 |
| 63 | 1  | 0 | 0.576874  | -0.824318 | -1.819014 | 37                                                             | 6      | 0      | 2.010126                | -0.430605 | -0.359282 |
| 64 | 16 | 0 | -1.613570 | 0.713242  | -1.891119 | 38                                                             | 6      | 0      | 3.498454                | -0.707407 | -0.690526 |
| 65 | 6  | 0 | -3.256724 | 0.275874  | -1.379381 | 39                                                             | 7      | 0      | 1.143021                | -1.427014 | -1.113553 |
| 66 | 6  | 0 | -3.170540 | -0.448835 | -0.193288 | 40                                                             | 1      | 0      | 3.577301                | -0.647183 | -1.787355 |
| 67 | 6  | 0 | -1.688793 | -0.672639 | 0.198680  | 41                                                             | 6      | 0      | 4.405903                | 0.380372  | -0.096705 |
| 68 | 7  | 0 | -0.926874 | 0.420823  | -0.439065 | 42                                                             | 1      | 0      | 1.794244                | -0.536827 | 0.702132  |
| 69 | 6  | 0 | -4.445387 | 0.575276  | -2.024691 | 43                                                             | 6      | 0      | 0.243759                | -2.498833 | -0.424762 |
| 70 | 6  | 0 | -5.622548 | 0.126707  | -1.430537 | 44                                                             | 6      | 0      | -1.268583               | -2.117650 | -0.257908 |
| 71 | 6  | 0 | -5.571337 | -0.597093 | -0.238858 | 45                                                             | 6      | 0      | -2.009536               | -3.298682 | 0.310921  |
| 72 | 6  | 0 | -4.358396 | -0.897002 | 0.384385  | 46                                                             | 1      | 0      | -3.064343               | -3.043507 | 0.427684  |
| 73 | 8  | 0 | -1.157636 | -0.260559 | -2.901282 | 47                                                             | 1      | 0      | -1.976200               | -4.138708 | -0.389846 |
| 74 | 6  | 0 | -1.368963 | -0.586842 | 1.688235  | 48                                                             | 1      | 0      | -1.595852               | -2.085815 | -1.405484 |
| 75 | 8  | 0 | -0.244306 | -0.389148 | 2.096232  | 49                                                             | 1      | 0      | 4.100252                | 1.369443  | -0.454743 |
| 76 | 8  | 0 | -2.414754 | -0.770406 | 2.478505  | 50                                                             | 1      | 0      | 4.291683                | 0.375975  | 0.996094  |
| 77 | 6  | 0 | -2.142541 | -0.772810 | 3.892021  | 51                                                             | 6      | 0      | 3.983944                | -2.090769 | -0.238907 |
| 78 | 1  | 0 | -3.093435 | -0.996642 | 4.370997  | 52                                                             | 6      | 0      | 5.455375                | -2.316645 | -0.598732 |
| 79 | 1  | 0 | -1.398613 | -1.535375 | 4.131183  | 53                                                             | 6      | 0      | 6.348120                | -1.232113 | -0.000816 |
| 80 | 1  | 0 | -4.354976 | -1.453306 | 1.313452  | 54                                                             | 6      | 0      | 5.876513                | 0.147899  | -0.452245 |
| 81 | 1  | 0 | -6.494964 | -0.934888 | 0.220186  | 55                                                             | 1      | 0      | 5.560607                | -2.309152 | -1.691820 |
| 82 | 1  | 0 | -6.579611 | 0.345426  | -1.892303 | 56                                                             | 1      | 0      | 5.765243                | -3.308451 | -0.254486 |
| 83 | 1  | 0 | -4.453670 | 1.148447  | -2.946389 | 57                                                             | 1      | 0      | 6.306437                | -1.290273 | 1.095328  |
| 84 | 1  | 0 | -1.776945 | 0.206918  | 4.204063  | 58                                                             | 1      | 0      | 7.391202                | -1.393932 | -0.291038 |
| 85 | 8  | 0 | -1.510398 | 2.126870  | -2.252009 | 59                                                             | 1      | 0      | 6.488117                | 0.934171  | 0.001656  |
| 86 | 1  | 0 | -0.879543 | 1.523365  | 0.295182  | 60                                                             | 1      | 0      | 5.998839                | 0.234872  | -1.539971 |
|    |    |   |           |           |           | 61                                                             | 1      | 0      | 3.856664                | -2.172693 | 0.849551  |
|    |    |   |           |           |           | 62                                                             | 1      | 0      | 3.392414                | -2.892619 | -0.695724 |
|    |    |   |           |           |           | 63                                                             | 1      | 0      | 0.586667                | -0.888987 | -1.802448 |

4-IM5

|    |    |   |           |           |           |    |    |   |           |           |           |
|----|----|---|-----------|-----------|-----------|----|----|---|-----------|-----------|-----------|
| 64 | 16 | 0 | -1.678099 | 0.707154  | -1.956423 | 38 | 1  | 0 | 1.506775  | 5.128473  | 1.200810  |
| 65 | 6  | 0 | -3.294223 | 0.266686  | -1.382920 | 39 | 1  | 0 | 0.299917  | 5.531204  | -0.019928 |
| 66 | 6  | 0 | -3.183520 | -0.468311 | -0.205301 | 40 | 1  | 0 | 1.873951  | 4.915843  | -1.830179 |
| 67 | 6  | 0 | -1.706307 | -0.705759 | 0.180853  | 41 | 1  | 0 | 2.616140  | 6.127583  | -0.785929 |
| 68 | 7  | 0 | -0.927546 | 0.341767  | -0.513153 | 42 | 1  | 0 | 4.207136  | 4.254188  | -1.317735 |
| 69 | 6  | 0 | -4.495785 | 0.579690  | -1.998917 | 43 | 1  | 0 | 3.886324  | 4.373184  | 0.410792  |
| 70 | 6  | 0 | -5.660004 | 0.128388  | -1.384072 | 44 | 1  | 0 | 0.276273  | 3.177706  | -0.810093 |
| 71 | 6  | 0 | -5.584805 | -0.608807 | -0.201674 | 45 | 1  | 0 | -0.149486 | 3.297665  | 0.898772  |
| 72 | 6  | 0 | -4.360813 | -0.917177 | 0.393069  | 46 | 1  | 0 | 1.024652  | 0.859924  | 2.528679  |
| 73 | 8  | 0 | -1.232015 | -0.257282 | -2.964654 | 47 | 8  | 0 | 0.865306  | -1.579180 | 1.811988  |
| 74 | 6  | 0 | -1.374295 | -0.534372 | 1.663281  | 48 | 1  | 0 | 1.130049  | -1.989842 | 0.912471  |
| 75 | 8  | 0 | -0.254788 | -0.269832 | 2.041675  | 49 | 6  | 0 | -1.442082 | -2.082719 | 3.441994  |
| 76 | 8  | 0 | -2.406158 | -0.725457 | 2.465177  | 50 | 6  | 0 | -2.423277 | -2.478131 | 2.338395  |
| 77 | 6  | 0 | -2.126848 | -0.650874 | 3.876497  | 51 | 1  | 0 | -1.939714 | -2.070556 | 4.415606  |
| 78 | 1  | 0 | -3.052058 | -0.938234 | 4.371413  | 52 | 1  | 0 | -2.765430 | -3.505428 | 2.497228  |
| 79 | 1  | 0 | -1.318884 | -1.338447 | 4.133964  | 53 | 1  | 0 | -3.311008 | -1.839164 | 2.379176  |
| 80 | 1  | 0 | -4.339072 | -1.480451 | 1.317581  | 54 | 1  | 0 | -0.633864 | -2.819366 | 3.493964  |
| 81 | 1  | 0 | -6.499009 | -0.948776 | 0.273951  | 55 | 6  | 0 | -0.821838 | -0.708780 | 3.178755  |
| 82 | 1  | 0 | -6.625903 | 0.355683  | -1.822238 | 56 | 1  | 0 | -0.038535 | -0.500552 | 3.915494  |
| 83 | 1  | 0 | -4.522206 | 1.163554  | -2.913393 | 57 | 1  | 0 | -1.575970 | 0.076891  | 3.280589  |
| 84 | 1  | 0 | -1.847995 | 0.369700  | 4.144396  | 58 | 6  | 0 | -0.163679 | -0.676941 | 1.793115  |
| 85 | 8  | 0 | -1.557530 | 2.128619  | -2.248296 | 59 | 6  | 0 | -1.151907 | -1.006166 | 0.637416  |
| 86 | 1  | 0 | -0.834120 | 1.226779  | 0.072943  | 60 | 6  | 0 | -1.758374 | -2.388031 | 0.964123  |
|    |    |   |           |           |           | 61 | 1  | 0 | -2.445261 | -2.685408 | 0.170296  |
|    |    |   |           |           |           | 62 | 1  | 0 | -0.931682 | -3.103779 | 0.937039  |
|    |    |   |           |           |           | 63 | 1  | 0 | -0.538742 | -1.131007 | -0.266084 |
|    |    |   |           |           |           | 64 | 16 | 0 | -1.341876 | 0.863073  | -2.134975 |
|    |    |   |           |           |           | 65 | 6  | 0 | -2.805969 | -0.125322 | -2.150374 |
|    |    |   |           |           |           | 66 | 6  | 0 | -3.164357 | -0.451528 | -0.847065 |
|    |    |   |           |           |           | 67 | 6  | 0 | -2.188762 | 0.102972  | 0.203371  |
|    |    |   |           |           |           | 68 | 7  | 0 | -1.423939 | 1.179949  | -0.477842 |
|    |    |   |           |           |           | 69 | 6  | 0 | -3.515062 | -0.529317 | -3.272589 |
|    |    |   |           |           |           | 70 | 6  | 0 | -4.654527 | -1.297889 | -3.056696 |
|    |    |   |           |           |           | 71 | 6  | 0 | -5.038340 | -1.640728 | -1.758203 |
|    |    |   |           |           |           | 72 | 6  | 0 | -4.301253 | -1.231295 | -0.647641 |
|    |    |   |           |           |           | 73 | 8  | 0 | -0.167119 | 0.033969  | -2.395201 |
|    |    |   |           |           |           | 74 | 6  | 0 | -2.957439 | 0.745031  | 1.367801  |
|    |    |   |           |           |           | 75 | 8  | 0 | -3.988277 | 0.329685  | 1.826042  |
|    |    |   |           |           |           | 76 | 8  | 0 | -2.326086 | 1.834667  | 1.824889  |
|    |    |   |           |           |           | 77 | 6  | 0 | -2.954644 | 2.503516  | 2.939524  |
|    |    |   |           |           |           | 78 | 1  | 0 | -2.296153 | 3.332960  | 3.188160  |
|    |    |   |           |           |           | 79 | 1  | 0 | -3.938825 | 2.865711  | 2.640711  |
|    |    |   |           |           |           | 80 | 1  | 0 | -4.614454 | -1.501902 | 0.354054  |
|    |    |   |           |           |           | 81 | 1  | 0 | -5.933514 | -2.234696 | -1.605409 |
|    |    |   |           |           |           | 82 | 1  | 0 | -5.249840 | -1.625438 | -3.902063 |
|    |    |   |           |           |           | 83 | 1  | 0 | -3.201958 | -0.241930 | -4.270999 |
|    |    |   |           |           |           | 84 | 1  | 0 | -3.048967 | 1.814252  | 3.780741  |
|    |    |   |           |           |           | 85 | 8  | 0 | -1.474226 | 2.123141  | -2.849780 |
|    |    |   |           |           |           | 86 | 1  | 0 | -1.867692 | 2.094691  | -0.369840 |

#### 4-IM6

Zero-point correction = 0.75732 a.u.

Thermal correction to Gibbs Free Energy = 0.69056 a.u.

Sum of electronic and zero-point Energies = -2237.23848 a.u.

Sum of electronic and thermal Free Energies = -2237.30524 a.u.

Standard orientation:

| Center Number | Atomic Number | Atomic Type | Coordinates (Angstroms) |           |           |
|---------------|---------------|-------------|-------------------------|-----------|-----------|
|               |               |             | X                       | Y         | Z         |
| 1             | 1             | 0           | -0.258802               | 1.449575  | 1.644153  |
| 2             | 7             | 0           | 3.241376                | -0.683802 | 0.044281  |
| 3             | 6             | 0           | 3.033232                | -0.629107 | -1.407320 |
| 4             | 6             | 0           | 2.953557                | -2.021211 | -2.039885 |
| 5             | 6             | 0           | 4.188388                | -2.833773 | -1.646640 |
| 6             | 6             | 0           | 4.301936                | -1.580031 | 0.510177  |
| 7             | 6             | 0           | 4.165002                | -2.967437 | -0.122410 |
| 8             | 1             | 0           | 3.880425                | -0.089584 | -1.853575 |
| 9             | 1             | 0           | 2.127212                | -0.071308 | -1.641335 |
| 10            | 1             | 0           | 2.922253                | -1.869919 | -3.124047 |
| 11            | 6             | 0           | 1.691987                | -2.792248 | -1.648733 |
| 12            | 1             | 0           | 5.103606                | -2.326337 | -1.972661 |
| 13            | 1             | 0           | 5.282213                | -1.157034 | 0.250176  |
| 14            | 1             | 0           | 4.230041                | -1.631627 | 1.597094  |
| 15            | 6             | 0           | 2.896980                | -3.718083 | 0.300477  |
| 16            | 1             | 0           | 5.019783                | -3.559947 | 0.221001  |
| 17            | 7             | 0           | 1.655144                | -3.087305 | -0.202958 |
| 18            | 1             | 0           | 1.668918                | -3.724254 | -2.232678 |
| 19            | 1             | 0           | 0.798398                | -2.210985 | -1.901235 |
| 20            | 1             | 0           | 2.978294                | -4.748367 | -0.075971 |
| 21            | 1             | 0           | 4.163086                | -3.820746 | -2.122330 |
| 22            | 1             | 0           | 2.823619                | -3.764000 | 1.392364  |
| 23            | 1             | 0           | 0.908935                | -3.766933 | -0.058009 |
| 24            | 6             | 0           | 2.692154                | 0.155647  | 0.943782  |
| 25            | 8             | 0           | 3.099928                | 0.295325  | 2.096143  |
| 26            | 6             | 0           | 1.453499                | 0.972738  | 0.548801  |
| 27            | 6             | 0           | 1.840087                | 2.463814  | 0.497107  |
| 28            | 7             | 0           | 0.476806                | 0.733978  | 1.662954  |
| 29            | 1             | 0           | 2.241351                | 2.713872  | 1.491047  |
| 30            | 6             | 0           | 2.962346                | 2.674383  | -0.532244 |
| 31            | 1             | 0           | 0.975359                | 0.652854  | -0.373844 |
| 32            | 1             | 0           | 3.815033                | 2.022800  | -0.307675 |
| 33            | 1             | 0           | 2.585265                | 2.387136  | -1.524556 |
| 34            | 6             | 0           | 0.676422                | 3.414632  | 0.184937  |
| 35            | 6             | 0           | 1.146521                | 4.871497  | 0.195578  |
| 36            | 6             | 0           | 2.267696                | 5.090244  | -0.819747 |
| 37            | 6             | 0           | 3.428869                | 4.131567  | -0.557864 |

#### 3-H<sub>2</sub>O-TS1'

Zero-point correction = 0.75068 a.u.

Thermal correction to Gibbs Free Energy = 0.67949 a.u.

Sum of electronic and zero-point Energies = -2237.21946 a.u.

Sum of electronic and thermal Free Energies = -2237.29065 a.u.

Standard orientation:

| Center Number | Atomic Number | Atomic Type | Coordinates (Angstroms) |           |           |
|---------------|---------------|-------------|-------------------------|-----------|-----------|
|               |               |             | X                       | Y         | Z         |
| 1             | 7             | 0           | -2.615526               | -1.098881 | -0.438338 |
| 2             | 6             | 0           | -3.032767               | -1.113915 | 0.970335  |
| 3             | 6             | 0           | -3.107146               | -2.543924 | 1.527481  |
| 4             | 6             | 0           | -4.010608               | -3.403817 | 0.639848  |
| 5             | 6             | 0           | -3.341492               | -2.019124 | -1.328128 |
| 6             | 6             | 0           | -3.380063               | -3.435142 | -0.754259 |
| 7             | 1             | 0           | -4.029063               | -0.659700 | 1.057061  |
| 8             | 1             | 0           | -2.335977               | -0.521384 | 1.563876  |
| 9             | 1             | 0           | -3.520011               | -2.471194 | 2.538336  |
| 10            | 6             | 0           | -1.744573               | -3.222009 | 1.660581  |
| 11            | 1             | 0           | -5.013433               | -2.968028 | 0.585126  |



|    |    |   |           |           |           |
|----|----|---|-----------|-----------|-----------|
| 12 | 1  | 0 | -4.369254 | -1.655401 | -1.460379 |
| 13 | 1  | 0 | -2.844883 | -2.001856 | -2.297545 |
| 14 | 6  | 0 | -1.998975 | -4.086748 | -0.692627 |
| 15 | 1  | 0 | -3.980473 | -4.047808 | -1.433378 |
| 16 | 7  | 0 | -1.113285 | -3.410797 | 0.314027  |
| 17 | 1  | 0 | -1.856305 | -4.215304 | 2.101178  |
| 18 | 1  | 0 | -1.041477 | -2.635158 | 2.252822  |
| 19 | 1  | 0 | -2.082290 | -5.129180 | -0.376537 |
| 20 | 1  | 0 | -4.102043 | -4.414267 | 1.051522  |
| 21 | 1  | 0 | -0.807100 | -2.487496 | -0.027834 |
| 22 | 1  | 0 | -1.473752 | -4.039088 | -1.648717 |
| 23 | 1  | 0 | -0.248897 | -3.953788 | 0.410449  |
| 24 | 6  | 0 | -1.912240 | -0.090998 | -1.028958 |
| 25 | 8  | 0 | -1.781847 | -0.042336 | -2.251729 |
| 26 | 6  | 0 | -1.305955 | 1.013251  | -0.158033 |
| 27 | 6  | 0 | -2.360341 | 2.124049  | 0.072156  |
| 28 | 7  | 0 | -0.115249 | 1.481067  | -0.847386 |
| 29 | 1  | 0 | -3.269413 | 1.621651  | 0.440217  |
| 30 | 6  | 0 | -1.898407 | 3.099498  | 1.159999  |
| 31 | 1  | 0 | -0.997910 | 0.607161  | 0.803441  |
| 32 | 6  | 0 | 1.041726  | 1.890839  | -0.312236 |
| 33 | 6  | 0 | 1.345148  | 1.841908  | 1.038094  |
| 34 | 6  | 0 | 2.593746  | 2.468333  | 1.605118  |
| 35 | 6  | 0 | 3.662268  | 2.789230  | 0.555589  |
| 36 | 6  | 0 | 2.078866  | 2.335592  | -1.317701 |
| 37 | 6  | 0 | 3.034847  | 3.360747  | -0.711638 |
| 38 | 1  | 0 | 0.517707  | 1.730718  | 1.732821  |
| 39 | 1  | 0 | 2.305152  | 3.395238  | 2.121684  |
| 40 | 1  | 0 | 3.006059  | 1.816922  | 2.388184  |
| 41 | 1  | 0 | 4.210701  | 1.879258  | 0.287605  |
| 42 | 1  | 0 | 4.389320  | 3.488459  | 0.979723  |
| 43 | 1  | 0 | 3.806402  | 3.618384  | -1.442893 |
| 44 | 1  | 0 | 2.484823  | 4.281118  | -0.478848 |
| 45 | 1  | 0 | 2.641596  | 1.449929  | -1.646939 |
| 46 | 1  | 0 | 1.569523  | 2.729534  | -2.202174 |
| 47 | 1  | 0 | -0.178387 | 1.513968  | -1.865816 |
| 48 | 1  | 0 | -1.672417 | 2.545466  | 2.081328  |
| 49 | 1  | 0 | -0.964102 | 3.577647  | 0.834091  |
| 50 | 6  | 0 | -2.725255 | 2.877619  | -1.213007 |
| 51 | 6  | 0 | -3.777367 | 3.955755  | -0.939911 |
| 52 | 6  | 0 | -3.310175 | 4.926216  | 0.145893  |
| 53 | 6  | 0 | -2.951487 | 4.176240  | 1.429669  |
| 54 | 1  | 0 | -4.710664 | 3.475064  | -0.615608 |
| 55 | 1  | 0 | -4.003079 | 4.496465  | -1.864797 |
| 56 | 1  | 0 | -2.424294 | 5.467767  | -0.212785 |
| 57 | 1  | 0 | -4.083446 | 5.675436  | 0.345356  |
| 58 | 1  | 0 | -2.586821 | 4.872197  | 2.192457  |
| 59 | 1  | 0 | -3.855708 | 3.701832  | 1.835248  |
| 60 | 1  | 0 | -1.818601 | 3.352000  | -1.614575 |
| 61 | 1  | 0 | -3.083940 | 2.178903  | -1.976534 |
| 62 | 8  | 0 | -0.061247 | 1.501539  | -3.845781 |
| 63 | 1  | 0 | 0.689247  | 0.894703  | -3.784035 |
| 64 | 1  | 0 | -0.806445 | 0.929778  | 3.599673  |
| 65 | 16 | 0 | 1.487753  | -1.562188 | -1.395349 |
| 66 | 6  | 0 | 3.132999  | -1.308390 | -0.784794 |
| 67 | 6  | 0 | 3.036242  | -0.792115 | 0.505387  |
| 68 | 6  | 0 | 1.601418  | -0.645522 | 0.887367  |
| 69 | 7  | 0 | 0.715087  | -1.080464 | 0.015113  |
| 70 | 6  | 0 | 4.331227  | -1.551602 | -1.430221 |
| 71 | 6  | 0 | 5.497199  | -1.280841 | -0.711856 |
| 72 | 6  | 0 | 5.428602  | -0.798626 | 0.596297  |
| 73 | 6  | 0 | 4.206512  | -0.549285 | 1.223741  |
| 74 | 8  | 0 | 1.232537  | -0.673862 | -2.524759 |
| 75 | 6  | 0 | 1.232081  | -0.484442 | 2.330593  |
| 76 | 8  | 0 | 2.045055  | -0.336025 | 3.213132  |
| 77 | 8  | 0 | -0.088035 | -0.545391 | 2.537211  |
| 78 | 6  | 0 | -0.505656 | -0.324897 | 3.894139  |
| 79 | 1  | 0 | -1.593601 | -0.383029 | 3.882018  |
| 80 | 1  | 0 | -0.088234 | -1.091437 | 4.549425  |
| 81 | 1  | 0 | 4.168390  | -0.181920 | 2.240903  |
| 82 | 1  | 0 | 6.347557  | -0.608693 | 1.141157  |
| 83 | 1  | 0 | 6.463297  | -1.457630 | -1.172422 |

#### 4-H<sub>2</sub>O-TS1'

Zero-point correction = 0.75156 a.u.

Thermal correction to Gibbs Free Energy = 0.67940 a.u.

Sum of electronic and zero-point Energies = -2237.21075 a.u.

Sum of electronic and thermal Free Energies = -2237.28291 a.u.

Standard orientation:

| -----  |        |        |                         |           |           |  |
|--------|--------|--------|-------------------------|-----------|-----------|--|
| Center | Atomic | Atomic | Coordinates (Angstroms) |           |           |  |
| Number | Number | Type   | X                       | Y         | Z         |  |
| -----  |        |        |                         |           |           |  |
| 1      | 8      | 0      | -0.448064               | -1.911129 | -2.408829 |  |
| 2      | 1      | 0      | 0.321486                | -1.480398 | -1.991747 |  |
| 3      | 1      | 0      | -0.970435               | -1.128532 | -2.651146 |  |
| 4      | 6      | 0      | 0.742492                | 0.480095  | 4.032200  |  |
| 5      | 6      | 0      | 2.181638                | 0.047581  | 3.784888  |  |
| 6      | 1      | 0      | 0.292734                | -0.099124 | 4.843910  |  |
| 7      | 1      | 0      | 2.771263                | 0.126061  | 4.703034  |  |
| 8      | 1      | 0      | 2.192620                | -1.005767 | 3.485527  |  |
| 9      | 1      | 0      | 0.724479                | 1.533060  | 4.338573  |  |
| 10     | 6      | 0      | -0.107370               | 0.313977  | 2.770940  |  |
| 11     | 1      | 0      | -1.094390               | 0.750232  | 2.946084  |  |
| 12     | 1      | 0      | -0.263959               | -0.753159 | 2.549693  |  |
| 13     | 7      | 0      | -2.757441               | -0.894309 | -0.454815 |  |
| 14     | 6      | 0      | -3.159808               | -1.261743 | 0.909093  |  |
| 15     | 6      | 0      | -3.367429               | -2.772962 | 1.040220  |  |
| 16     | 6      | 0      | -4.405504               | -3.246807 | 0.022732  |  |
| 17     | 6      | 0      | -3.565890               | -1.481872 | -1.541518 |  |
| 18     | 6      | 0      | -3.822037               | -2.982514 | -1.366487 |  |
| 19     | 1      | 0      | -4.092691               | -0.748252 | 1.181059  |  |
| 20     | 1      | 0      | -2.377910               | -0.962123 | 1.606662  |  |
| 21     | 1      | 0      | -3.717755               | -2.957556 | 2.060451  |  |
| 22     | 6      | 0      | -2.069125               | -3.566920 | 0.882169  |  |
| 23     | 1      | 0      | -5.340694               | -2.693267 | 0.156790  |  |
| 24     | 1      | 0      | -4.538248               | -0.969045 | -1.553374 |  |
| 25     | 1      | 0      | -3.070736               | -1.276035 | -2.489083 |  |
| 26     | 6      | 0      | -2.579603               | -3.846953 | -1.563732 |  |
| 27     | 1      | 0      | -4.533581               | -3.275781 | -2.144210 |  |
| 28     | 7      | 0      | -1.551465               | -3.531157 | -0.522623 |  |
| 29     | 1      | 0      | -2.247840               | -4.618659 | 1.118835  |  |
| 30     | 1      | 0      | -1.269656               | -3.183490 | 1.518579  |  |
| 31     | 1      | 0      | -2.833224               | -4.904931 | -1.459606 |  |
| 32     | 1      | 0      | -4.620137               | -4.312448 | 0.154339  |  |
| 33     | 1      | 0      | -2.098531               | -3.673999 | -2.526651 |  |
| 34     | 1      | 0      | -0.779860               | -4.199726 | -0.605082 |  |
| 35     | 6      | 0      | -2.019627               | 0.217400  | -0.748180 |  |
| 36     | 8      | 0      | -1.702517               | 0.509165  | -1.899809 |  |
| 37     | 6      | 0      | -1.661570               | 1.208052  | 0.374217  |  |
| 38     | 6      | 0      | -2.287514               | 2.568559  | 0.008469  |  |
| 39     | 7      | 0      | -0.221749               | 1.324330  | 0.517277  |  |
| 40     | 1      | 0      | -1.828444               | 2.894794  | -0.936210 |  |
| 41     | 6      | 0      | -3.799092               | 2.425420  | -0.209807 |  |
| 42     | 1      | 0      | -2.085114               | 0.902683  | 1.326021  |  |
| 43     | 6      | 0      | 0.538507                | 0.952367  | 1.564808  |  |
| 44     | 6      | 0      | 1.914964                | 1.107741  | 1.499664  |  |
| 45     | 6      | 0      | 2.816011                | 0.901164  | 2.688264  |  |
| 46     | 1      | 0      | 3.764076                | 0.455876  | 2.361626  |  |
| 47     | 1      | 0      | 3.080924                | 1.885777  | 3.099973  |  |
| 48     | 1      | 0      | 2.292520                | 1.761246  | 0.716254  |  |
| 49     | 1      | 0      | -4.001838               | 1.711558  | -1.016752 |  |
| 50     | 1      | 0      | -4.250414               | 2.018361  | 0.708136  |  |
| 51     | 6      | 0      | -2.001421               | 3.611815  | 1.093386  |  |
| 52     | 6      | 0      | -2.646905               | 4.957984  | 0.756283  |  |
| 53     | 6      | 0      | -4.153609               | 4.811486  | 0.541447  |  |
| 54     | 6      | 0      | -4.447555               | 3.771554  | -0.540185 |  |
| 55     | 1      | 0      | -2.189223               | 5.354173  | -0.160087 |  |
| 56     | 1      | 0      | -2.440983               | 5.679919  | 1.553403  |  |
| 57     | 1      | 0      | -4.622907               | 4.495423  | 1.483618  |  |

|    |    |   |           |           |           |    |    |   |           |           |           |
|----|----|---|-----------|-----------|-----------|----|----|---|-----------|-----------|-----------|
| 58 | 1  | 0 | -4.596240 | 5.776150  | 0.271464  | 32 | 6  | 0 | -0.611012 | -2.172985 | -0.153823 |
| 59 | 1  | 0 | -5.527599 | 3.642971  | -0.667112 | 33 | 6  | 0 | -0.930897 | -2.077281 | 1.185086  |
| 60 | 1  | 0 | -4.053143 | 4.128853  | -1.500822 | 34 | 6  | 0 | -2.065672 | -2.850037 | 1.806489  |
| 61 | 1  | 0 | -2.404695 | 3.245851  | 2.050174  | 35 | 6  | 0 | -3.042450 | -3.445764 | 0.787363  |
| 62 | 1  | 0 | -0.921002 | 3.731837  | 1.225061  | 36 | 6  | 0 | -1.533514 | -2.884019 | -1.118099 |
| 63 | 1  | 0 | 0.251574  | 1.764658  | -0.269958 | 37 | 6  | 0 | -2.302212 | -4.005708 | -0.423200 |
| 64 | 1  | 0 | -1.128957 | -2.619198 | -0.782732 | 38 | 1  | 0 | -0.157906 | -1.735998 | 1.867413  |
| 65 | 16 | 0 | 2.127859  | 0.968264  | -2.189346 | 39 | 1  | 0 | -1.638172 | -3.660005 | 2.415103  |
| 66 | 6  | 0 | 3.766616  | 0.743288  | -1.537626 | 40 | 1  | 0 | -2.600711 | -2.203699 | 2.516715  |
| 67 | 6  | 0 | 3.678468  | -0.127203 | -0.450638 | 41 | 1  | 0 | -3.736364 | -2.673646 | 0.436594  |
| 68 | 6  | 0 | 2.255403  | -0.537521 | -0.261525 | 42 | 1  | 0 | -3.643953 | -4.221883 | 1.270328  |
| 69 | 7  | 0 | 1.414369  | -0.172727 | -1.202574 | 43 | 1  | 0 | -3.003333 | -4.461277 | -1.128336 |
| 70 | 6  | 0 | 4.949514  | 1.306276  | -1.974552 | 44 | 1  | 0 | -1.600900 | -4.788323 | -0.107418 |
| 71 | 6  | 0 | 6.110564  | 0.955283  | -1.280940 | 45 | 1  | 0 | -2.239936 | -2.150107 | -1.533643 |
| 72 | 6  | 0 | 6.051479  | 0.075135  | -0.201182 | 46 | 1  | 0 | -0.942909 | -3.260197 | -1.958987 |
| 73 | 6  | 0 | 4.842213  | -0.476481 | 0.230136  | 47 | 1  | 0 | 0.530496  | -1.703076 | -1.743940 |
| 74 | 8  | 0 | 1.607615  | 2.289716  | -1.819805 | 48 | 1  | 0 | 2.206223  | -2.235623 | 2.210557  |
| 75 | 6  | 0 | 1.763330  | -1.652305 | 0.608682  | 49 | 1  | 0 | 1.663148  | -3.427958 | 1.026311  |
| 76 | 8  | 0 | 0.619330  | -2.057785 | 0.564285  | 50 | 6  | 0 | 3.249974  | -2.528242 | -1.090179 |
| 77 | 8  | 0 | 2.709080  | -2.161715 | 1.386514  | 51 | 6  | 0 | 4.473543  | -3.399859 | -0.799452 |
| 78 | 6  | 0 | 2.313608  | -3.286651 | 2.189398  | 52 | 6  | 0 | 4.195282  | -4.387180 | 0.335117  |
| 79 | 1  | 0 | 3.176751  | -3.524052 | 2.807764  | 53 | 6  | 0 | 3.733674  | -3.652882 | 1.594799  |
| 80 | 1  | 0 | 1.454530  | -3.029000 | 2.812063  | 54 | 1  | 0 | 5.317539  | -2.755354 | -0.517307 |
| 81 | 1  | 0 | 4.816291  | -1.168491 | 1.062406  | 55 | 1  | 0 | 4.771890  | -3.934850 | -1.706977 |
| 82 | 1  | 0 | 6.965870  | -0.192971 | 0.317796  | 56 | 1  | 0 | 3.409033  | -5.085608 | 0.017475  |
| 83 | 1  | 0 | 7.065764  | 1.362363  | -1.594585 | 57 | 1  | 0 | 5.087777  | -4.984578 | 0.549130  |
| 84 | 1  | 0 | 4.977800  | 1.977785  | -2.826572 | 58 | 1  | 0 | 3.506668  | -4.366336 | 2.393838  |
| 85 | 1  | 0 | 2.061402  | -4.130406 | 1.543717  | 59 | 1  | 0 | 4.550050  | -3.014215 | 1.959286  |
| 86 | 8  | 0 | 2.023791  | 0.561765  | -3.582651 | 60 | 1  | 0 | 2.430872  | -3.164815 | -1.453217 |
|    |    |   |           |           |           | 61 | 1  | 0 | 3.473380  | -1.813104 | -1.888875 |
|    |    |   |           |           |           | 62 | 8  | 0 | 0.468559  | -1.868653 | -3.713691 |
|    |    |   |           |           |           | 63 | 1  | 0 | -0.390141 | -1.424750 | -3.731311 |
|    |    |   |           |           |           | 64 | 1  | 0 | 1.071628  | -1.137939 | -3.498530 |
|    |    |   |           |           |           | 65 | 16 | 0 | -1.654429 | 1.054918  | -1.579668 |
|    |    |   |           |           |           | 66 | 6  | 0 | -3.230477 | 0.522266  | -0.969018 |
|    |    |   |           |           |           | 67 | 6  | 0 | -3.072551 | 0.177596  | 0.370687  |
|    |    |   |           |           |           | 68 | 6  | 0 | -1.644948 | 0.337425  | 0.767433  |
|    |    |   |           |           |           | 69 | 7  | 0 | -0.825265 | 0.806585  | -0.143797 |
|    |    |   |           |           |           | 70 | 6  | 0 | -4.438021 | 0.473902  | -1.640994 |
|    |    |   |           |           |           | 71 | 6  | 0 | -5.551034 | 0.072578  | -0.900019 |
|    |    |   |           |           |           | 72 | 6  | 0 | -5.426399 | -0.244274 | 0.453955  |
|    |    |   |           |           |           | 73 | 6  | 0 | -4.194395 | -0.195795 | 1.108972  |
|    |    |   |           |           |           | 74 | 8  | 0 | -1.196525 | 0.205200  | -2.671556 |
|    |    |   |           |           |           | 75 | 6  | 0 | -1.280914 | 0.398820  | 2.218172  |
|    |    |   |           |           |           | 76 | 8  | 0 | -2.075956 | 0.220937  | 3.111016  |
|    |    |   |           |           |           | 77 | 8  | 0 | 0.009894  | 0.684085  | 2.415614  |
|    |    |   |           |           |           | 78 | 6  | 0 | 0.435648  | 0.665587  | 3.788144  |
|    |    |   |           |           |           | 79 | 1  | 0 | 1.505085  | 0.875347  | 3.768951  |
|    |    |   |           |           |           | 80 | 1  | 0 | -0.094571 | 1.428661  | 4.361031  |
|    |    |   |           |           |           | 81 | 1  | 0 | -4.112545 | -0.437933 | 2.160501  |
|    |    |   |           |           |           | 82 | 1  | 0 | -6.308308 | -0.536850 | 1.014266  |
|    |    |   |           |           |           | 83 | 1  | 0 | -6.522590 | 0.019010  | -1.379375 |
|    |    |   |           |           |           | 84 | 1  | 0 | -4.518324 | 0.743958  | -2.689108 |
|    |    |   |           |           |           | 85 | 8  | 0 | -1.631080 | 2.506794  | -1.811679 |
|    |    |   |           |           |           | 86 | 1  | 0 | 0.249657  | -0.317999 | 4.225433  |
|    |    |   |           |           |           | 87 | 8  | 0 | -2.148157 | 3.369305  | 0.885694  |
|    |    |   |           |           |           | 88 | 1  | 0 | -2.469508 | 3.343526  | -0.029280 |
|    |    |   |           |           |           | 89 | 1  | 0 | -2.729250 | 3.986399  | 1.350766  |

### 3-2H<sub>2</sub>O-TS1'

Zero-point correction = 0.77559 a.u.

Thermal correction to Gibbs Free Energy = 0.70074 a.u.

Sum of electronic and zero-point Energies = -2313.60593 a.u.

Sum of electronic and thermal Free Energies = -2313.68078 a.u.

Standard orientation:

| Center Number | Atomic Number | Atomic Type | Coordinates (Angstroms) |           |           |
|---------------|---------------|-------------|-------------------------|-----------|-----------|
|               |               |             | X                       | Y         | Z         |
| 1             | 7             | 0           | 2.454165                | 1.408963  | -0.524663 |
| 2             | 6             | 0           | 2.936592                | 1.571504  | 0.854545  |
| 3             | 6             | 0           | 2.790267                | 3.018753  | 1.357289  |
| 4             | 6             | 0           | 3.430603                | 3.991388  | 0.363210  |
| 5             | 6             | 0           | 2.915495                | 2.414039  | -1.494203 |
| 6             | 6             | 0           | 2.691247                | 3.830167  | -0.967550 |
| 7             | 1             | 0           | 4.000577                | 1.302554  | 0.897075  |
| 8             | 1             | 0           | 2.389699                | 0.893379  | 1.512539  |
| 9             | 1             | 0           | 3.295501                | 3.071581  | 2.326777  |
| 10            | 6             | 0           | 1.342504                | 3.447138  | 1.585444  |
| 11            | 1             | 0           | 4.492033                | 3.759600  | 0.227995  |
| 12            | 1             | 0           | 3.985181                | 2.265207  | -1.694566 |
| 13            | 1             | 0           | 2.369083                | 2.249159  | -2.421809 |
| 14            | 6             | 0           | 1.207173                | 4.171708  | -0.806086 |
| 15            | 1             | 0           | 3.089960                | 4.524341  | -1.713407 |
| 16            | 7             | 0           | 0.572352                | 3.395285  | 0.306566  |
| 17            | 1             | 0           | 1.307137                | 4.481352  | 1.937661  |
| 18            | 1             | 0           | 0.815285                | 2.809646  | 2.293397  |
| 19            | 1             | 0           | 1.086077                | 5.228136  | -0.553447 |
| 20            | 1             | 0           | 3.352412                | 5.018173  | 0.735703  |
| 21            | 1             | 0           | 0.448568                | 2.406841  | 0.033461  |
| 22            | 1             | 0           | 0.633886                | 3.948801  | -1.708892 |
| 23            | 1             | 0           | -0.397449               | 3.719302  | 0.483242  |
| 24            | 6             | 0           | 1.948705                | 0.251570  | -1.038145 |
| 25            | 8             | 0           | 1.822680                | 0.105004  | -2.253882 |
| 26            | 6             | 0           | 1.550896                | -0.886908 | -0.093412 |
| 27            | 6             | 0           | 2.780124                | -1.792130 | 0.170548  |
| 28            | 7             | 0           | 0.451489                | -1.590956 | -0.732872 |
| 29            | 1             | 0           | 3.595746                | -1.128110 | 0.499428  |
| 30            | 6             | 0           | 2.507446                | -2.783471 | 1.307606  |
| 31            | 1             | 0           | 1.190585                | -0.477386 | 0.849290  |

### 4-2H<sub>2</sub>O-TS1'

Zero-point correction = 0.77650 a.u.

Thermal correction to Gibbs Free Energy = 0.70279 a.u.

Sum of electronic and zero-point Energies = -2313.59807 a.u.

Sum of electronic and thermal Free Energies = -2313.67179 a.u.

Standard orientation:

| Center Number | Atomic Number | Atomic Type | Coordinates (Angstroms) |          |          |
|---------------|---------------|-------------|-------------------------|----------|----------|
|               |               |             | X                       | Y        | Z        |
| 1             | 6             | 0           | 1.250337                | 2.595366 | 3.218268 |
| 2             | 6             | 0           | 2.652102                | 2.001365 | 3.224247 |

|    |    |   |           |           |           |    |   |   |           |           |           |
|----|----|---|-----------|-----------|-----------|----|---|---|-----------|-----------|-----------|
| 3  | 1  | 0 | 0.847139  | 2.666684  | 4.232531  | 75 | 6 | 0 | 0.942163  | -1.778283 | 3.473918  |
| 4  | 1  | 0 | 3.312841  | 2.575260  | 3.880869  | 76 | 1 | 0 | -0.126805 | -1.977536 | 3.536674  |
| 5  | 1  | 0 | 2.612237  | 0.980230  | 3.621619  | 77 | 1 | 0 | 1.512496  | -2.673543 | 3.728300  |
| 6  | 1  | 0 | 1.284877  | 3.613960  | 2.811392  | 78 | 1 | 0 | 5.339357  | -0.474888 | 1.458884  |
| 7  | 6  | 0 | 0.306141  | 1.748718  | 2.364722  | 79 | 1 | 0 | 7.332859  | -0.207362 | 1.007615  |
| 8  | 1  | 0 | -0.648132 | 2.268391  | 2.262956  | 80 | 1 | 0 | 7.132979  | -0.240652 | -2.449584 |
| 9  | 1  | 0 | 0.095056  | 0.790872  | 2.861352  | 81 | 1 | 0 | 4.897138  | -0.559569 | -3.527228 |
| 10 | 7  | 0 | -3.095081 | -0.566273 | -0.379867 | 82 | 1 | 0 | 1.219199  | -0.963976 | 4.147545  |
| 11 | 6  | 0 | -4.013297 | -0.027408 | 0.634020  | 83 | 8 | 0 | 2.032278  | -2.122879 | -2.845364 |
| 12 | 6  | 0 | -4.804119 | -1.134540 | 1.331461  | 84 | 8 | 0 | -0.707240 | -2.821738 | -2.512065 |
| 13 | 6  | 0 | -5.577950 | -1.940229 | 0.287186  | 85 | 1 | 0 | 0.224824  | -2.876240 | -2.776064 |
| 14 | 6  | 0 | -3.678443 | -1.548586 | -1.313404 | 86 | 1 | 0 | -0.917229 | -1.872782 | -2.576125 |
| 15 | 6  | 0 | -4.541173 | -2.606279 | -0.617305 | 87 | 8 | 0 | -0.743697 | -2.573237 | 0.205647  |
| 16 | 1  | 0 | -4.730046 | 0.650945  | 0.153945  | 88 | 1 | 0 | -0.732582 | -2.757502 | -0.760932 |
| 17 | 1  | 0 | -3.453271 | 0.542264  | 1.375879  | 89 | 1 | 0 | -0.017450 | -1.937856 | 0.321733  |
| 18 | 1  | 0 | -5.494751 | -0.641115 | 2.022040  |    |   |   |           |           |           |
| 19 | 6  | 0 | -3.936326 | -2.060461 | 2.181893  |    |   |   |           |           |           |
| 20 | 1  | 0 | -6.223074 | -1.274571 | -0.295327 |    |   |   |           |           |           |
| 21 | 1  | 0 | -4.297124 | -1.012654 | -2.046481 |    |   |   |           |           |           |
| 22 | 1  | 0 | -2.863582 | -2.032451 | -1.850066 |    |   |   |           |           |           |
| 23 | 6  | 0 | -3.736729 | -3.610067 | 0.203469  |    |   |   |           |           |           |
| 24 | 1  | 0 | -5.033594 | -3.178083 | -1.409641 |    |   |   |           |           |           |
| 25 | 7  | 0 | -3.052350 | -2.938452 | 1.353185  |    |   |   |           |           |           |
| 26 | 1  | 0 | -4.574386 | -2.723850 | 2.770619  |    |   |   |           |           |           |
| 27 | 1  | 0 | -3.286443 | -1.500882 | 2.858928  |    |   |   |           |           |           |
| 28 | 1  | 0 | -4.400048 | -4.374408 | 0.615535  |    |   |   |           |           |           |
| 29 | 1  | 0 | -6.211694 | -2.693566 | 0.766743  |    |   |   |           |           |           |
| 30 | 1  | 0 | -2.953072 | -4.092501 | -0.385479 |    |   |   |           |           |           |
| 31 | 1  | 0 | -2.663059 | -3.666111 | 1.959815  |    |   |   |           |           |           |
| 32 | 6  | 0 | -1.966795 | 0.067903  | -0.799970 |    |   |   |           |           |           |
| 33 | 8  | 0 | -1.369258 | -0.253590 | -1.827212 |    |   |   |           |           |           |
| 34 | 6  | 0 | -1.400481 | 1.267243  | -0.028706 |    |   |   |           |           |           |
| 35 | 6  | 0 | -1.758641 | 2.565954  | -0.798207 |    |   |   |           |           |           |
| 36 | 7  | 0 | 0.049017  | 1.112448  | 0.002748  |    |   |   |           |           |           |
| 37 | 1  | 0 | -1.257228 | 2.482047  | -1.774475 |    |   |   |           |           |           |
| 38 | 6  | 0 | -3.264270 | 2.712226  | -1.048731 |    |   |   |           |           |           |
| 39 | 1  | 0 | -1.778216 | 1.317200  | 0.989305  |    |   |   |           |           |           |
| 40 | 6  | 0 | 0.880517  | 1.450935  | 0.999618  |    |   |   |           |           |           |
| 41 | 6  | 0 | 2.258643  | 1.457847  | 0.777645  |    |   |   |           |           |           |
| 42 | 6  | 0 | 3.226626  | 1.987538  | 1.807832  |    |   |   |           |           |           |
| 43 | 1  | 0 | 4.153405  | 1.402218  | 1.786628  |    |   |   |           |           |           |
| 44 | 1  | 0 | 3.515420  | 3.009402  | 1.524605  |    |   |   |           |           |           |
| 45 | 1  | 0 | 2.565288  | 1.543704  | -0.262455 |    |   |   |           |           |           |
| 46 | 1  | 0 | -3.652918 | 1.838425  | -1.586804 |    |   |   |           |           |           |
| 47 | 1  | 0 | -3.783762 | 2.758827  | -0.081115 |    |   |   |           |           |           |
| 48 | 6  | 0 | -1.225131 | 3.810641  | -0.080739 |    |   |   |           |           |           |
| 49 | 6  | 0 | -1.524503 | 5.081182  | -0.880167 |    |   |   |           |           |           |
| 50 | 6  | 0 | -3.023057 | 5.225890  | -1.146032 |    |   |   |           |           |           |
| 51 | 6  | 0 | -3.571687 | 3.982794  | -1.846016 |    |   |   |           |           |           |
| 52 | 1  | 0 | -0.988885 | 5.034780  | -1.837781 |    |   |   |           |           |           |
| 53 | 1  | 0 | -1.143212 | 5.955924  | -0.343117 |    |   |   |           |           |           |
| 54 | 1  | 0 | -3.546294 | 5.362862  | -0.189583 |    |   |   |           |           |           |
| 55 | 1  | 0 | -3.220176 | 6.119091  | -1.747870 |    |   |   |           |           |           |
| 56 | 1  | 0 | -4.652436 | 4.072017  | -1.997595 |    |   |   |           |           |           |
| 57 | 1  | 0 | -3.114830 | 3.895986  | -2.840658 |    |   |   |           |           |           |
| 58 | 1  | 0 | -1.707298 | 3.884426  | 0.905615  |    |   |   |           |           |           |
| 59 | 1  | 0 | -0.146335 | 3.723675  | 0.090836  |    |   |   |           |           |           |
| 60 | 1  | 0 | 0.454655  | 0.923331  | -0.914752 |    |   |   |           |           |           |
| 61 | 1  | 0 | -2.195395 | -2.459583 | 0.954044  |    |   |   |           |           |           |
| 62 | 16 | 0 | 2.208263  | -0.914367 | -2.036759 |    |   |   |           |           |           |
| 63 | 6  | 0 | 3.911568  | -0.665002 | -1.609907 |    |   |   |           |           |           |
| 64 | 6  | 0 | 3.991146  | -0.624225 | -0.220299 |    |   |   |           |           |           |
| 65 | 6  | 0 | 2.626894  | -0.807849 | 0.363473  |    |   |   |           |           |           |
| 66 | 7  | 0 | 1.677263  | -1.171677 | -0.483107 |    |   |   |           |           |           |
| 67 | 6  | 0 | 5.000582  | -0.521623 | -2.447741 |    |   |   |           |           |           |
| 68 | 6  | 0 | 6.244399  | -0.346803 | -1.836426 |    |   |   |           |           |           |
| 69 | 6  | 0 | 6.354474  | -0.326345 | -0.446104 |    |   |   |           |           |           |
| 70 | 6  | 0 | 5.237267  | -0.465305 | 0.381350  |    |   |   |           |           |           |
| 71 | 8  | 0 | 1.621625  | 0.324525  | -2.558978 |    |   |   |           |           |           |
| 72 | 6  | 0 | 2.453381  | -1.120637 | 1.814093  |    |   |   |           |           |           |
| 73 | 8  | 0 | 3.362463  | -1.131047 | 2.612807  |    |   |   |           |           |           |
| 74 | 8  | 0 | 1.184774  | -1.406418 | 2.110655  |    |   |   |           |           |           |

### 3-3H<sub>2</sub>O-TS1'

Zero-point correction = 0.80148 a.u.

Thermal correction to Gibbs Free Energy = 0.72524 a.u.

Sum of electronic and zero-point Energies = -2389.99223 a.u.

Sum of electronic and thermal Free Energies = -2390.06846 a.u.

Standard orientation:

| Center Number | Atomic Number | Atomic Type | Coordinates (Angstroms) |           |           |
|---------------|---------------|-------------|-------------------------|-----------|-----------|
|               |               |             | X                       | Y         | Z         |
| 1             | 7             | 0           | -2.851642               | -0.438751 | -0.264765 |
| 2             | 6             | 0           | -3.085570               | -0.358232 | 1.182151  |
| 3             | 6             | 0           | -3.374452               | -1.744675 | 1.760405  |
| 4             | 6             | 0           | -4.630869               | -2.302064 | 1.088689  |
| 5             | 6             | 0           | -3.895612               | -1.150368 | -1.030955 |
| 6             | 6             | 0           | -4.299550               | -2.490155 | -0.393500 |
| 7             | 1             | 0           | -3.948512               | 0.294151  | 1.372586  |
| 8             | 1             | 0           | -2.216632               | 0.072005  | 1.674026  |
| 9             | 1             | 0           | -3.537813               | -1.619715 | 2.835911  |
| 10            | 6             | 0           | -2.199072               | -2.715121 | 1.603891  |
| 11            | 1             | 0           | -5.460661               | -1.598533 | 1.214393  |
| 12            | 1             | 0           | -4.781470               | -0.503299 | -1.072743 |
| 13            | 1             | 0           | -3.527488               | -1.298023 | -2.045092 |
| 14            | 6             | 0           | -3.228378               | -3.571844 | -0.517401 |
| 15            | 1             | 0           | -5.177926               | -2.845590 | -0.940742 |
| 16            | 7             | 0           | -1.982887               | -3.142488 | 0.185627  |
| 17            | 1             | 0           | -2.395764               | -3.628932 | 2.170624  |
| 18            | 1             | 0           | -1.258015               | -2.276990 | 1.942859  |
| 19            | 1             | 0           | -3.566819               | -4.494854 | -0.038990 |
| 20            | 1             | 0           | -4.925889               | -3.257076 | 1.535733  |
| 21            | 1             | 0           | -1.546494               | -2.398504 | -0.377916 |
| 22            | 1             | 0           | -2.954249               | -3.767107 | -1.552704 |
| 23            | 1             | 0           | -1.270845               | -3.907519 | 0.202460  |
| 24            | 6             | 0           | -1.957807               | 0.330342  | -0.929389 |
| 25            | 8             | 0           | -1.867414               | 0.308090  | -2.164812 |
| 26            | 6             | 0           | -1.107157               | 1.319170  | -0.130494 |
| 27            | 6             | 0           | -1.954363               | 2.599288  | 0.106481  |
| 28            | 7             | 0           | 0.110363                | 1.567087  | -0.876563 |
| 29            | 1             | 0           | -2.915911               | 2.262242  | 0.524312  |
| 30            | 6             | 0           | -1.308539               | 3.526352  | 1.141315  |
| 31            | 1             | 0           | -0.822817               | 0.882473  | 0.824372  |
| 32            | 6             | 0           | 1.315216                | 1.856870  | -0.375161 |
| 33            | 6             | 0           | 1.637596                | 1.790331  | 0.974075  |
| 34            | 6             | 0           | 2.945287                | 2.322947  | 1.504434  |
| 35            | 6             | 0           | 4.018304                | 2.526163  | 0.430942  |
| 36            | 6             | 0           | 2.369063                | 2.188167  | -1.406477 |
| 37            | 6             | 0           | 3.420873                | 3.135474  | -0.832522 |
| 38            | 1             | 0           | 0.815391                | 1.794612  | 1.682021  |
| 39            | 1             | 0           | 2.742818                | 3.285383  | 1.996510  |
| 40            | 1             | 0           | 3.315661                | 1.663482  | 2.301190  |
| 41            | 1             | 0           | 4.474626                | 1.565578  | 0.165965  |
| 42            | 1             | 0           | 4.815324                | 3.160242  | 0.831034  |
| 43            | 1             | 0           | 4.197348                | 3.315051  | -1.581295 |
| 44            | 1             | 0           | 2.956017                | 4.102771  | -0.604000 |
| 45            | 1             | 0           | 2.849104                | 1.253756  | -1.729792 |

|    |    |   |           |           |           |    |    |   |           |           |           |
|----|----|---|-----------|-----------|-----------|----|----|---|-----------|-----------|-----------|
| 46 | 1  | 0 | 1.880073  | 2.609690  | -2.289794 | 14 | 6  | 0 | -3.917893 | -1.547831 | -1.172993 |
| 47 | 1  | 0 | 0.018424  | 1.602613  | -1.893585 | 15 | 6  | 0 | -4.604021 | -2.709823 | -0.455061 |
| 48 | 1  | 0 | -1.132861 | 2.973886  | 2.073960  | 16 | 1  | 0 | -4.470310 | 0.453072  | 0.877396  |
| 49 | 1  | 0 | -0.328008 | 3.855833  | 0.770744  | 17 | 1  | 0 | -2.947755 | 0.011695  | 1.696506  |
| 50 | 6  | 0 | -2.248026 | 3.359403  | -1.193204 | 18 | 1  | 0 | -4.961584 | -1.130077 | 2.564305  |
| 51 | 6  | 0 | -3.117340 | 4.590828  | -0.926701 | 19 | 6  | 0 | -3.468759 | -2.587946 | 2.226820  |
| 52 | 6  | 0 | -2.476223 | 5.512262  | 0.111369  | 20 | 1  | 0 | -6.151275 | -1.440913 | 0.373767  |
| 53 | 6  | 0 | -2.184365 | 4.752910  | 1.406682  | 21 | 1  | 0 | -4.686470 | -0.922043 | -1.647575 |
| 54 | 1  | 0 | -4.099846 | 4.263321  | -0.559592 | 22 | 1  | 0 | -3.251634 | -1.915913 | -1.951342 |
| 55 | 1  | 0 | -3.291820 | 5.130740  | -1.863109 | 23 | 6  | 0 | -3.630536 | -3.783897 | 0.026186  |
| 56 | 1  | 0 | -1.535351 | 5.910097  | -0.292420 | 24 | 1  | 0 | -5.256408 | -3.192066 | -1.189483 |
| 57 | 1  | 0 | -3.125994 | 6.370595  | 0.312500  | 25 | 7  | 0 | -2.737645 | -3.263471 | 1.109961  |
| 58 | 1  | 0 | -1.696761 | 5.408827  | 2.135332  | 26 | 1  | 0 | -4.019156 | -3.365718 | 2.761726  |
| 59 | 1  | 0 | -3.133109 | 4.426094  | 1.854144  | 27 | 1  | 0 | -2.710043 | -2.157460 | 2.880682  |
| 60 | 1  | 0 | -1.294747 | 3.676853  | -1.638825 | 28 | 1  | 0 | -4.180470 | -4.627203 | 0.450952  |
| 61 | 1  | 0 | -2.736280 | 2.701671  | -1.920430 | 29 | 1  | 0 | -5.969293 | -2.991533 | 1.213962  |
| 62 | 8  | 0 | 0.077979  | 1.513391  | -3.833319 | 30 | 1  | 0 | -2.976021 | -4.129479 | -0.773812 |
| 63 | 1  | 0 | 0.659795  | 0.745237  | -3.742031 | 31 | 1  | 0 | -2.200907 | -4.046755 | 1.494703  |
| 64 | 1  | 0 | -0.795863 | 1.149913  | -3.622575 | 32 | 6  | 0 | -2.106825 | -0.000669 | -0.827216 |
| 65 | 16 | 0 | 1.522916  | -1.602058 | -1.296263 | 33 | 8  | 0 | -1.709501 | -0.256557 | -1.973578 |
| 66 | 6  | 0 | 3.166282  | -1.350327 | -0.692799 | 34 | 6  | 0 | -1.468112 | 1.192423  | -0.111599 |
| 67 | 6  | 0 | 3.064933  | -0.879863 | 0.612488  | 35 | 6  | 0 | -1.955421 | 2.472927  | -0.843742 |
| 68 | 6  | 0 | 1.628366  | -0.667820 | 0.958453  | 36 | 7  | 0 | -0.016716 | 1.052015  | -0.198340 |
| 69 | 7  | 0 | 0.731293  | -1.096369 | 0.084012  | 37 | 1  | 0 | -1.600961 | 2.390036  | -1.880262 |
| 70 | 6  | 0 | 4.363117  | -1.636180 | -1.323915 | 38 | 6  | 0 | -3.487240 | 2.571649  | -0.862446 |
| 71 | 6  | 0 | 5.525073  | -1.450651 | -0.573379 | 39 | 1  | 0 | -1.754538 | 1.230389  | 0.934195  |
| 72 | 6  | 0 | 5.449822  | -1.025565 | 0.754374  | 40 | 6  | 0 | 0.869869  | 1.579022  | 0.675454  |
| 73 | 6  | 0 | 4.229087  | -0.737701 | 1.367560  | 41 | 6  | 0 | 2.210372  | 1.654417  | 0.328673  |
| 74 | 8  | 0 | 1.220502  | -0.771308 | -2.461741 | 42 | 6  | 0 | 3.198754  | 2.486508  | 1.107022  |
| 75 | 6  | 0 | 1.242812  | -0.456877 | 2.392245  | 43 | 1  | 0 | 4.179071  | 1.995480  | 1.120883  |
| 76 | 8  | 0 | 2.047502  | -0.357568 | 3.288666  | 44 | 1  | 0 | 3.346943  | 3.432131  | 0.566337  |
| 77 | 8  | 0 | -0.079217 | -0.399813 | 2.571146  | 45 | 1  | 0 | 2.443187  | 1.483585  | -0.721726 |
| 78 | 6  | 0 | -0.505102 | -0.185043 | 3.926469  | 46 | 1  | 0 | -3.930996 | 1.672797  | -1.308847 |
| 79 | 1  | 0 | -1.594489 | -0.174644 | 3.895239  | 47 | 1  | 0 | -3.851244 | 2.633013  | 0.173858  |
| 80 | 1  | 0 | -0.150723 | -0.995157 | 4.565919  | 48 | 6  | 0 | -1.361014 | 3.752456  | -0.245270 |
| 81 | 1  | 0 | 4.188284  | -0.422077 | 2.401299  | 49 | 6  | 0 | -1.810294 | 4.984965  | -1.033959 |
| 82 | 1  | 0 | 6.364415  | -0.915074 | 1.327866  | 50 | 6  | 0 | -3.335062 | 5.087800  | -1.072080 |
| 83 | 1  | 0 | 6.491219  | -1.658304 | -1.020660 | 51 | 6  | 0 | -3.951715 | 3.808095  | -1.637707 |
| 84 | 1  | 0 | 4.396562  | -1.997885 | -2.346391 | 52 | 1  | 0 | -1.424880 | 4.911292  | -2.059655 |
| 85 | 8  | 0 | 1.272687  | -3.042741 | -1.486351 | 53 | 1  | 0 | -1.375270 | 5.887788  | -0.592622 |
| 86 | 1  | 0 | -0.123705 | 0.769771  | 4.294280  | 54 | 1  | 0 | -3.710775 | 5.248900  | -0.052233 |
| 87 | 8  | 0 | -1.338595 | -2.370670 | -2.436645 | 55 | 1  | 0 | -3.645017 | 5.953549  | -1.666592 |
| 88 | 1  | 0 | -0.484397 | -2.759771 | -2.666383 | 56 | 1  | 0 | -5.044994 | 3.868450  | -1.619319 |
| 89 | 1  | 0 | -1.276691 | -1.431243 | -2.671852 | 57 | 1  | 0 | -3.654743 | 3.698475  | -2.689171 |
| 90 | 8  | 0 | 0.239790  | -4.696216 | 0.546465  | 58 | 1  | 0 | -1.697139 | 3.853456  | 0.797240  |
| 91 | 1  | 0 | 0.810994  | -4.245025 | -0.098838 | 59 | 1  | 0 | -0.266386 | 3.698678  | -0.234677 |
| 92 | 1  | 0 | 0.309024  | -5.638430 | 0.342492  | 60 | 1  | 0 | 0.315259  | 0.943718  | -1.158497 |
|    |    |   |           |           |           | 61 | 1  | 0 | -2.024798 | -2.621165 | 0.719425  |
|    |    |   |           |           |           | 62 | 16 | 0 | 1.970424  | -1.824894 | -1.501118 |
|    |    |   |           |           |           | 63 | 6  | 0 | 3.641972  | -1.251922 | -1.583497 |
|    |    |   |           |           |           | 64 | 6  | 0 | 3.945405  | -0.654178 | -0.363947 |
|    |    |   |           |           |           | 65 | 6  | 0 | 2.751594  | -0.714361 | 0.537098  |
|    |    |   |           |           |           | 66 | 7  | 0 | 1.703087  | -1.364578 | 0.081054  |
|    |    |   |           |           |           | 67 | 6  | 0 | 4.529668  | -1.351421 | -2.638327 |
|    |    |   |           |           |           | 68 | 6  | 0 | 5.804754  | -0.820384 | -2.436633 |
|    |    |   |           |           |           | 69 | 6  | 0 | 6.142241  | -0.233263 | -1.216645 |
|    |    |   |           |           |           | 70 | 6  | 0 | 5.227725  | -0.145251 | -0.165167 |
|    |    |   |           |           |           | 71 | 8  | 0 | 1.118786  | -1.073508 | -2.426490 |
|    |    |   |           |           |           | 72 | 6  | 0 | 2.934373  | -0.527006 | 2.011314  |
|    |    |   |           |           |           | 73 | 8  | 0 | 3.982158  | -0.181232 | 2.507495  |
|    |    |   |           |           |           | 74 | 8  | 0 | 1.843864  | -0.836094 | 2.716136  |
|    |    |   |           |           |           | 75 | 6  | 0 | 1.992954  | -0.749356 | 4.143812  |
|    |    |   |           |           |           | 76 | 1  | 0 | 1.040317  | -1.075348 | 4.559049  |
|    |    |   |           |           |           | 77 | 1  | 0 | 2.799188  | -1.405436 | 4.476023  |
|    |    |   |           |           |           | 78 | 1  | 0 | 5.515051  | 0.288075  | 0.783595  |
|    |    |   |           |           |           | 79 | 1  | 0 | 7.143314  | 0.160784  | -1.076112 |
|    |    |   |           |           |           | 80 | 1  | 0 | 6.541046  | -0.876772 | -3.231315 |
|    |    |   |           |           |           | 81 | 1  | 0 | 4.253140  | -1.829208 | -3.572815 |
|    |    |   |           |           |           | 82 | 1  | 0 | 2.205767  | 0.278014  | 4.445904  |
|    |    |   |           |           |           | 83 | 8  | 0 | 1.882357  | -3.284010 | -1.589794 |
|    |    |   |           |           |           | 84 | 8  | 0 | -0.951871 | -2.768121 | -0.994800 |
|    |    |   |           |           |           | 85 | 1  | 0 | -0.200054 | -3.332247 | -1.225823 |

#### 4-3H<sub>2</sub>O-TS1'

Zero-point correction = 0.80153 a.u.

Thermal correction to Gibbs Free Energy = 0.72507 a.u.

Sum of electronic and zero-point Energies = -2389.98465 a.u.

Sum of electronic and thermal Free Energies = -2390.06111 a.u.

Standard orientation:

| Center Number | Atomic Number | Atomic Type | Coordinates (Angstroms) |           |           |
|---------------|---------------|-------------|-------------------------|-----------|-----------|
|               |               |             | X                       | Y         | Z         |
| 1             | 6             | 0           | 1.274127                | 3.147593  | 2.594699  |
| 2             | 6             | 0           | 2.753125                | 2.786672  | 2.539609  |
| 3             | 1             | 0           | 0.968527                | 3.370047  | 3.621549  |
| 4             | 1             | 0           | 3.362436                | 3.598941  | 2.947501  |
| 5             | 1             | 0           | 2.933255                | 1.910875  | 3.171574  |
| 6             | 1             | 0           | 1.089155                | 4.051754  | 2.000240  |
| 7             | 6             | 0           | 0.408687                | 2.011403  | 2.046560  |
| 8             | 1             | 0           | -0.632388               | 2.331894  | 2.023909  |
| 9             | 1             | 0           | 0.448823                | 1.134134  | 2.705640  |
| 10            | 7             | 0           | -3.123006               | -0.697715 | -0.265111 |
| 11            | 6             | 0           | -3.731073               | -0.343660 | 1.028317  |
| 12            | 6             | 0           | -4.434934               | -1.532929 | 1.693698  |
| 13            | 6             | 0           | -5.422328               | -2.179825 | 0.722917  |

|    |   |   |           |           |           |    |    |   |           |           |           |
|----|---|---|-----------|-----------|-----------|----|----|---|-----------|-----------|-----------|
| 86 | 1 | 0 | -0.942743 | -2.042041 | -1.641104 | 54 | 1  | 0 | -2.593971 | 4.450745  | -2.127487 |
| 87 | 8 | 0 | -0.813996 | -1.240450 | 1.584893  | 55 | 1  | 0 | -1.091808 | 5.100746  | -2.780165 |
| 88 | 1 | 0 | -0.222382 | -1.329972 | 2.342831  | 56 | 1  | 0 | -0.341741 | 5.744994  | -0.510280 |
| 89 | 1 | 0 | -0.186475 | -1.268844 | 0.838144  | 57 | 1  | 0 | -1.917403 | 6.461711  | -0.843290 |
| 90 | 8 | 0 | 0.217697  | 1.424234  | -3.202491 | 58 | 1  | 0 | -1.821575 | 5.463671  | 1.456796  |
| 91 | 1 | 0 | 0.977954  | 0.858988  | -3.390251 | 59 | 1  | 0 | -3.035549 | 4.664108  | 0.458636  |
| 92 | 1 | 0 | -0.480483 | 0.777381  | -3.000021 | 60 | 1  | 0 | 0.222637  | 3.408237  | -1.532236 |
|    |   |   |           |           |           | 61 | 1  | 0 | -0.974306 | 2.607479  | -2.552421 |
|    |   |   |           |           |           | 62 | 8  | 0 | 0.398195  | 0.217756  | -3.934830 |
|    |   |   |           |           |           | 63 | 1  | 0 | 0.851636  | -0.557650 | -3.577183 |
|    |   |   |           |           |           | 64 | 1  | 0 | -0.494600 | 0.132730  | -3.569267 |
|    |   |   |           |           |           | 65 | 16 | 0 | 1.445891  | -2.404416 | -0.722360 |
|    |   |   |           |           |           | 66 | 6  | 0 | 3.190432  | -2.121468 | -0.620510 |
|    |   |   |           |           |           | 67 | 6  | 0 | 3.436098  | -1.333227 | 0.501839  |
|    |   |   |           |           |           | 68 | 6  | 0 | 2.142584  | -1.010187 | 1.174400  |
|    |   |   |           |           |           | 69 | 7  | 0 | 1.056252  | -1.455962 | 0.636040  |
|    |   |   |           |           |           | 70 | 6  | 0 | 4.170472  | -2.570753 | -1.483542 |
|    |   |   |           |           |           | 71 | 6  | 0 | 5.484201  | -2.205378 | -1.182008 |
|    |   |   |           |           |           | 72 | 6  | 0 | 5.763319  | -1.432181 | -0.055263 |
|    |   |   |           |           |           | 73 | 6  | 0 | 4.752793  | -0.989273 | 0.801113  |
|    |   |   |           |           |           | 74 | 8  | 0 | 0.904449  | -1.865906 | -1.965752 |
|    |   |   |           |           |           | 75 | 6  | 0 | 2.017761  | -0.335838 | 2.518772  |
|    |   |   |           |           |           | 76 | 8  | 0 | 0.974571  | -0.218150 | 3.122900  |
|    |   |   |           |           |           | 77 | 8  | 0 | 3.189638  | 0.057831  | 2.986364  |
|    |   |   |           |           |           | 78 | 6  | 0 | 3.162170  | 0.697808  | 4.274718  |
|    |   |   |           |           |           | 79 | 1  | 0 | 4.192239  | 0.980949  | 4.481267  |
|    |   |   |           |           |           | 80 | 1  | 0 | 2.517348  | 1.578013  | 4.242127  |
|    |   |   |           |           |           | 81 | 1  | 0 | 4.994674  | -0.387540 | 1.666932  |
|    |   |   |           |           |           | 82 | 1  | 0 | 6.791264  | -1.163336 | 0.163708  |
|    |   |   |           |           |           | 83 | 1  | 0 | 6.292657  | -2.529892 | -1.828179 |
|    |   |   |           |           |           | 84 | 1  | 0 | 3.931464  | -3.176430 | -2.351509 |
|    |   |   |           |           |           | 85 | 8  | 0 | 1.090820  | -3.779782 | -0.384676 |
|    |   |   |           |           |           | 86 | 1  | 0 | 2.796045  | -0.002225 | 5.027539  |
|    |   |   |           |           |           | 87 | 8  | 0 | -1.660973 | -2.912224 | -2.763190 |
|    |   |   |           |           |           | 88 | 1  | 0 | -0.743350 | -3.173848 | -2.924290 |
|    |   |   |           |           |           | 89 | 1  | 0 | -1.614834 | -1.940228 | -2.707651 |
|    |   |   |           |           |           | 90 | 8  | 0 | -1.676162 | -2.910050 | -0.047732 |
|    |   |   |           |           |           | 91 | 1  | 0 | -1.704103 | -2.982701 | -1.029120 |
|    |   |   |           |           |           | 92 | 1  | 0 | -1.015616 | -3.561893 | 0.225935  |
|    |   |   |           |           |           | 93 | 8  | 0 | -1.448714 | -1.166287 | 2.111925  |
|    |   |   |           |           |           | 94 | 1  | 0 | -1.013891 | -1.472252 | 1.300517  |
|    |   |   |           |           |           | 95 | 1  | 0 | -0.703621 | -0.844744 | 2.640583  |

### 3-IM1'

Zero-point correction = 0.82874 a.u.

Thermal correction to Gibbs Free Energy = 0.74807 a.u.

Sum of electronic and zero-point Energies = -2466.36720 a.u.

Sum of electronic and thermal Free Energies = -2466.44788 a.u.

Standard orientation:

| Center Number | Atomic Number | Atomic Type | Coordinates (Angstroms) |           |           |
|---------------|---------------|-------------|-------------------------|-----------|-----------|
|               |               |             | X                       | Y         | Z         |
| 1             | 7             | 0           | -3.107283               | -0.102667 | -0.293680 |
| 2             | 6             | 0           | -3.606264               | 0.674984  | 0.856135  |
| 3             | 6             | 0           | -4.776400               | 0.002353  | 1.583783  |
| 4             | 6             | 0           | -5.862468               | -0.382305 | 0.577795  |
| 5             | 6             | 0           | -4.096499               | -0.784721 | -1.151990 |
| 6             | 6             | 0           | -5.249110               | -1.413202 | -0.368541 |
| 7             | 1             | 0           | -3.969554               | 1.648677  | 0.503377  |
| 8             | 1             | 0           | -2.778516               | 0.833821  | 1.548111  |
| 9             | 1             | 0           | -5.159194               | 0.743701  | 2.291807  |
| 10            | 6             | 0           | -4.387062               | -1.218513 | 2.410489  |
| 11            | 1             | 0           | -6.189447               | 0.498301  | 0.014884  |
| 12            | 1             | 0           | -4.502624               | -0.061460 | -1.871300 |
| 13            | 1             | 0           | -3.571521               | -1.553487 | -1.720233 |
| 14            | 6             | 0           | -4.841720               | -2.664136 | 0.408605  |
| 15            | 1             | 0           | -5.984779               | -1.742498 | -1.108888 |
| 16            | 7             | 0           | -3.909324               | -2.324211 | 1.527592  |
| 17            | 1             | 0           | -5.256595               | -1.598346 | 2.952905  |
| 18            | 1             | 0           | -3.574840               | -1.007146 | 3.104070  |
| 19            | 1             | 0           | -5.719959               | -3.136005 | 0.855775  |
| 20            | 1             | 0           | -6.734304               | -0.798593 | 1.093194  |
| 21            | 1             | 0           | -2.981252               | -2.095802 | 1.135752  |
| 22            | 1             | 0           | -4.318209               | -3.386287 | -0.220992 |
| 23            | 1             | 0           | -3.749562               | -3.161622 | 2.095805  |
| 24            | 6             | 0           | -1.921634               | 0.177020  | -0.895085 |
| 25            | 8             | 0           | -1.679022               | -0.242332 | -2.036243 |
| 26            | 6             | 0           | -0.911292               | 1.112658  | -0.219167 |
| 27            | 6             | 0           | -1.440684               | 2.576948  | -0.430409 |
| 28            | 7             | 0           | 0.375470                | 0.851485  | -0.837372 |
| 29            | 1             | 0           | -2.522702               | 2.509296  | -0.613366 |
| 30            | 6             | 0           | -1.270675               | 3.472218  | 0.801386  |
| 31            | 1             | 0           | -0.857065               | 0.875776  | 0.848788  |
| 32            | 6             | 0           | 1.558525                | 1.444829  | -0.482806 |
| 33            | 6             | 0           | 1.849139                | 1.911557  | 0.759683  |
| 34            | 6             | 0           | 3.113100                | 2.666548  | 1.086448  |
| 35            | 6             | 0           | 4.194587                | 2.520323  | 0.013856  |
| 36            | 6             | 0           | 2.580734                | 1.490991  | -1.600797 |
| 37            | 6             | 0           | 3.593769                | 2.613562  | -1.385464 |
| 38            | 1             | 0           | 1.073154                | 1.894561  | 1.521395  |
| 39            | 1             | 0           | 2.865356                | 3.731648  | 1.212756  |
| 40            | 1             | 0           | 3.507850                | 2.339295  | 2.056238  |
| 41            | 1             | 0           | 4.682627                | 1.544092  | 0.117578  |
| 42            | 1             | 0           | 4.966435                | 3.282804  | 0.158012  |
| 43            | 1             | 0           | 4.376237                | 2.556160  | -2.148514 |
| 44            | 1             | 0           | 3.091926                | 3.582281  | -1.507615 |
| 45            | 1             | 0           | 3.102735                | 0.523759  | -1.655126 |
| 46            | 1             | 0           | 2.054768                | 1.612090  | -2.553710 |
| 47            | 1             | 0           | 0.305402                | 0.609142  | -1.819020 |
| 48            | 1             | 0           | -1.679168               | 2.970957  | 1.688405  |
| 49            | 1             | 0           | -0.202355               | 3.636588  | 0.986239  |
| 50            | 6             | 0           | -0.855535               | 3.254889  | -1.674495 |
| 51            | 6             | 0           | -1.530014               | 4.610300  | -1.904712 |
| 52            | 6             | 0           | -1.402763               | 5.510128  | -0.672806 |
| 53            | 6             | 0           | -1.954388               | 4.822559  | 0.578952  |

### 3-TS1'

Zero-point correction = 0.82744 a.u.

Thermal correction to Gibbs Free Energy = 0.74719 a.u.

Sum of electronic and zero-point Energies = -2466.36745 a.u.

Sum of electronic and thermal Free Energies = -2466.44770 a.u.

Standard orientation:

| Center Number | Atomic Number | Atomic Type | Coordinates (Angstroms) |           |           |
|---------------|---------------|-------------|-------------------------|-----------|-----------|
|               |               |             | X                       | Y         | Z         |
| 1             | 7             | 0           | -3.142241               | 0.001486  | -0.157092 |
| 2             | 6             | 0           | -3.587617               | 0.574587  | 1.125964  |
| 3             | 6             | 0           | -4.722541               | -0.219074 | 1.786787  |
| 4             | 6             | 0           | -5.858516               | -0.417796 | 0.782287  |
| 5             | 6             | 0           | -4.171217               | -0.534598 | -1.071561 |
| 6             | 6             | 0           | -5.301398               | -1.273969 | -0.355948 |
| 7             | 1             | 0           | -3.981685               | 1.583252  | 0.951280  |
| 8             | 1             | 0           | -2.726995               | 0.632748  | 1.793244  |
| 9             | 1             | 0           | -5.062006               | 0.389572  | 2.630429  |
| 10            | 6             | 0           | -4.315700               | -1.569081 | 2.369389  |
| 11            | 1             | 0           | -6.199241               | 0.548582  | 0.395985  |
| 12            | 1             | 0           | -4.595946               | 0.297991  | -1.648098 |
| 13            | 1             | 0           | -3.675451               | -1.205194 | -1.774296 |
| 14            | 6             | 0           | -4.880189               | -2.642802 | 0.175257  |
| 15            | 1             | 0           | -6.073384               | -1.460169 | -1.108519 |
| 16            | 7             | 0           | -3.891423               | -2.506614 | 1.287865  |
| 17            | 1             | 0           | -5.170767               | -2.029579 | 2.871060  |
| 18            | 1             | 0           | -3.476410               | -1.490461 | 3.057654  |

|    |    |   |           |           |           |    |   |   |           |           |           |
|----|----|---|-----------|-----------|-----------|----|---|---|-----------|-----------|-----------|
| 19 | 1  | 0 | -5.744328 | -3.176865 | 0.577833  | 91 | 1 | 0 | -1.744156 | -2.845366 | -1.388042 |
| 20 | 1  | 0 | -6.711347 | -0.913094 | 1.257861  | 92 | 1 | 0 | -1.001068 | -3.502157 | -0.213850 |
| 21 | 1  | 0 | -2.974477 | -2.219561 | 0.904831  | 93 | 8 | 0 | -1.433173 | -1.449575 | 1.953062  |
| 22 | 1  | 0 | -4.399276 | -3.250927 | -0.593442 | 94 | 1 | 0 | -0.940047 | -1.633730 | 1.137992  |
| 23 | 1  | 0 | -3.718769 | -3.430747 | 1.694154  | 95 | 1 | 0 | -0.729276 | -1.160812 | 2.552665  |
| 24 | 6  | 0 | -1.958449 | 0.306698  | -0.741777 |    |   |   |           |           |           |
| 25 | 8  | 0 | -1.736335 | -0.007387 | -1.920060 |    |   |   |           |           |           |
| 26 | 6  | 0 | -0.907053 | 1.169409  | -0.015172 |    |   |   |           |           |           |
| 27 | 6  | 0 | -1.400714 | 2.648147  | -0.042793 |    |   |   |           |           |           |
| 28 | 7  | 0 | 0.334769  | 1.018683  | -0.765303 |    |   |   |           |           |           |
| 29 | 1  | 0 | -2.411142 | 2.655982  | 0.382118  |    |   |   |           |           |           |
| 30 | 6  | 0 | -0.557031 | 3.583909  | 0.830731  |    |   |   |           |           |           |
| 31 | 1  | 0 | -0.770639 | 0.813835  | 1.011290  |    |   |   |           |           |           |
| 32 | 6  | 0 | 1.576511  | 1.378082  | -0.410646 |    |   |   |           |           |           |
| 33 | 6  | 0 | 2.003452  | 1.521990  | 0.896260  |    |   |   |           |           |           |
| 34 | 6  | 0 | 3.298939  | 2.219140  | 1.237770  |    |   |   |           |           |           |
| 35 | 6  | 0 | 4.267736  | 2.377912  | 0.059233  |    |   |   |           |           |           |
| 36 | 6  | 0 | 2.553317  | 1.544882  | -1.553042 |    |   |   |           |           |           |
| 37 | 6  | 0 | 3.529655  | 2.680820  | -1.240401 |    |   |   |           |           |           |
| 38 | 1  | 0 | 1.239169  | 1.543399  | 1.668478  |    |   |   |           |           |           |
| 39 | 1  | 0 | 3.036353  | 3.215403  | 1.624846  |    |   |   |           |           |           |
| 40 | 1  | 0 | 3.798947  | 1.706024  | 2.069066  |    |   |   |           |           |           |
| 41 | 1  | 0 | 4.839880  | 1.454890  | -0.082203 |    |   |   |           |           |           |
| 42 | 1  | 0 | 4.989013  | 3.167859  | 0.289800  |    |   |   |           |           |           |
| 43 | 1  | 0 | 4.237168  | 2.795515  | -2.066523 |    |   |   |           |           |           |
| 44 | 1  | 0 | 2.974408  | 3.623807  | -1.152770 |    |   |   |           |           |           |
| 45 | 1  | 0 | 3.118217  | 0.612567  | -1.697079 |    |   |   |           |           |           |
| 46 | 1  | 0 | 1.998852  | 1.729545  | -2.477219 |    |   |   |           |           |           |
| 47 | 1  | 0 | 0.190069  | 0.868255  | -1.761480 |    |   |   |           |           |           |
| 48 | 1  | 0 | -0.485415 | 3.182892  | 1.849304  |    |   |   |           |           |           |
| 49 | 1  | 0 | 0.463348  | 3.638764  | 0.430700  |    |   |   |           |           |           |
| 50 | 6  | 0 | -1.502514 | 3.202171  | -1.470638 |    |   |   |           |           |           |
| 51 | 6  | 0 | -2.080105 | 4.620228  | -1.467188 |    |   |   |           |           |           |
| 52 | 6  | 0 | -1.265084 | 5.554420  | -0.571423 |    |   |   |           |           |           |
| 53 | 6  | 0 | -1.154472 | 4.993344  | 0.847010  |    |   |   |           |           |           |
| 54 | 1  | 0 | -3.115945 | 4.584706  | -1.102553 |    |   |   |           |           |           |
| 55 | 1  | 0 | -2.116939 | 5.007390  | -2.490611 |    |   |   |           |           |           |
| 56 | 1  | 0 | -0.256238 | 5.665238  | -0.991868 |    |   |   |           |           |           |
| 57 | 1  | 0 | -1.715316 | 6.552520  | -0.553389 |    |   |   |           |           |           |
| 58 | 1  | 0 | -0.539945 | 5.649652  | 1.471945  |    |   |   |           |           |           |
| 59 | 1  | 0 | -2.153167 | 4.959326  | 1.303853  |    |   |   |           |           |           |
| 60 | 1  | 0 | -0.500467 | 3.220312  | -1.921363 |    |   |   |           |           |           |
| 61 | 1  | 0 | -2.120931 | 2.548095  | -2.096374 |    |   |   |           |           |           |
| 62 | 8  | 0 | 0.233578  | 0.725272  | -3.847623 |    |   |   |           |           |           |
| 63 | 1  | 0 | 0.608793  | -0.126516 | -3.582201 |    |   |   |           |           |           |
| 64 | 1  | 0 | -0.695650 | 0.648183  | -3.589804 |    |   |   |           |           |           |
| 65 | 16 | 0 | 1.418353  | -2.206184 | -0.971534 |    |   |   |           |           |           |
| 66 | 6  | 0 | 3.165993  | -1.995197 | -0.793912 |    |   |   |           |           |           |
| 67 | 6  | 0 | 3.396384  | -1.276599 | 0.376461  |    |   |   |           |           |           |
| 68 | 6  | 0 | 2.089481  | -0.957173 | 1.034805  |    |   |   |           |           |           |
| 69 | 7  | 0 | 1.006712  | -1.410584 | 0.435929  |    |   |   |           |           |           |
| 70 | 6  | 0 | 4.161691  | -2.430879 | -1.649109 |    |   |   |           |           |           |
| 71 | 6  | 0 | 5.474797  | -2.131721 | -1.286973 |    |   |   |           |           |           |
| 72 | 6  | 0 | 5.738832  | -1.426164 | -0.111781 |    |   |   |           |           |           |
| 73 | 6  | 0 | 4.714905  | -0.993030 | 0.732096  |    |   |   |           |           |           |
| 74 | 8  | 0 | 0.946865  | -1.529297 | -2.185000 |    |   |   |           |           |           |
| 75 | 6  | 0 | 1.968488  | -0.608619 | 2.491638  |    |   |   |           |           |           |
| 76 | 8  | 0 | 0.921083  | -0.541600 | 3.101090  |    |   |   |           |           |           |
| 77 | 8  | 0 | 3.150319  | -0.393636 | 3.051334  |    |   |   |           |           |           |
| 78 | 6  | 0 | 3.123323  | 0.018801  | 4.428155  |    |   |   |           |           |           |
| 79 | 1  | 0 | 4.163111  | 0.186334  | 4.701560  |    |   |   |           |           |           |
| 80 | 1  | 0 | 2.545220  | 0.939744  | 4.529200  |    |   |   |           |           |           |
| 81 | 1  | 0 | 4.946621  | -0.442382 | 1.634207  |    |   |   |           |           |           |
| 82 | 1  | 0 | 6.766987  | -1.204248 | 0.154897  |    |   |   |           |           |           |
| 83 | 1  | 0 | 6.294696  | -2.453000 | -1.920256 |    |   |   |           |           |           |
| 84 | 1  | 0 | 3.930962  | -2.984650 | -2.553526 |    |   |   |           |           |           |
| 85 | 8  | 0 | 1.017672  | -3.608908 | -0.839613 |    |   |   |           |           |           |
| 86 | 1  | 0 | 2.681941  | -0.764959 | 5.045459  |    |   |   |           |           |           |
| 87 | 8  | 0 | -1.595965 | -2.503040 | -3.101265 |    |   |   |           |           |           |
| 88 | 1  | 0 | -0.643473 | -2.652441 | -3.191989 |    |   |   |           |           |           |
| 89 | 1  | 0 | -1.648106 | -1.558158 | -2.872346 |    |   |   |           |           |           |
| 90 | 8  | 0 | -1.751485 | -2.922606 | -0.408929 |    |   |   |           |           |           |

### 3-IM2'

Zero-point correction = 0.83185 a.u.

Thermal correction to Gibbs Free Energy = 0.75357 a.u.

Sum of electronic and zero-point Energies = -2466.39030 a.u.

Sum of electronic and thermal Free Energies = -2466.46859 a.u.

Standard orientation:

| Center Number | Atomic Number | Atomic Type | Coordinates (Angstroms) |           |           |
|---------------|---------------|-------------|-------------------------|-----------|-----------|
|               |               |             | X                       | Y         | Z         |
| 1             | 7             | 0           | -3.241259               | -0.167262 | -0.178624 |
| 2             | 6             | 0           | -3.662349               | 0.280373  | 1.162743  |
| 3             | 6             | 0           | -4.628775               | -0.689666 | 1.853385  |
| 4             | 6             | 0           | -5.789021               | -1.015770 | 0.912653  |
| 5             | 6             | 0           | -4.248815               | -0.799004 | -1.052742 |
| 6             | 6             | 0           | -5.193214               | -1.733779 | -0.298970 |
| 7             | 1             | 0           | -4.190430               | 1.237349  | 1.067552  |
| 8             | 1             | 0           | -2.770633               | 0.413217  | 1.777653  |
| 9             | 1             | 0           | -4.994650               | -0.169748 | 2.744133  |
| 10            | 6             | 0           | -3.986649               | -1.984660 | 2.342422  |
| 11            | 1             | 0           | -6.293644               | -0.096306 | 0.597317  |
| 12            | 1             | 0           | -4.834192               | -0.011454 | -1.545007 |
| 13            | 1             | 0           | -3.714587               | -1.349445 | -1.828214 |
| 14            | 6             | 0           | -4.523718               | -3.036120 | 0.137927  |
| 15            | 1             | 0           | -5.981991               | -2.015328 | -1.003150 |
| 16            | 7             | 0           | -3.491531               | -2.790779 | 1.190573  |
| 17            | 1             | 0           | -4.728406               | -2.592513 | 2.867259  |
| 18            | 1             | 0           | -3.131236               | -1.802256 | 2.990366  |
| 19            | 1             | 0           | -5.263822               | -3.713940 | 0.570249  |
| 20            | 1             | 0           | -6.525093               | -1.651638 | 1.415590  |
| 21            | 1             | 0           | -2.649226               | -2.347439 | 0.776810  |
| 22            | 1             | 0           | -4.009548               | -3.532320 | -0.686038 |
| 23            | 1             | 0           | -3.148230               | -3.693474 | 1.532059  |
| 24            | 6             | 0           | -2.158274               | 0.331031  | -0.816308 |
| 25            | 8             | 0           | -1.985593               | 0.170024  | -2.030248 |
| 26            | 6             | 0           | -1.148657               | 1.196626  | -0.050079 |
| 27            | 6             | 0           | -1.694614               | 2.634447  | 0.162663  |
| 28            | 7             | 0           | 0.052780                | 1.289263  | -0.887175 |
| 29            | 1             | 0           | -2.654561               | 2.533189  | 0.680700  |
| 30            | 6             | 0           | -0.777075               | 3.454016  | 1.075403  |
| 31            | 1             | 0           | -0.907003               | 0.718121  | 0.899338  |
| 32            | 6             | 0           | 1.294873                | 1.328339  | -0.547104 |
| 33            | 6             | 0           | 1.785354                | 1.052327  | 0.844605  |
| 34            | 6             | 0           | 2.802472                | 2.119735  | 1.314076  |
| 35            | 6             | 0           | 3.750899                | 2.668884  | 0.240349  |
| 36            | 6             | 0           | 2.304231                | 1.716528  | -1.578336 |
| 37            | 6             | 0           | 3.018137                | 2.980359  | -1.059119 |
| 38            | 1             | 0           | 0.933184                | 1.083937  | 1.527870  |
| 39            | 1             | 0           | 2.211400                | 2.955634  | 1.705105  |
| 40            | 1             | 0           | 3.369359                | 1.719928  | 2.161092  |
| 41            | 1             | 0           | 4.549758                | 1.955760  | 0.022585  |
| 42            | 1             | 0           | 4.227892                | 3.571957  | 0.632682  |
| 43            | 1             | 0           | 3.715996                | 3.324380  | -1.826552 |
| 44            | 1             | 0           | 2.280330                | 3.778865  | -0.909848 |
| 45            | 1             | 0           | 3.038846                | 0.910925  | -1.691260 |
| 46            | 1             | 0           | 1.822370                | 1.889963  | -2.540700 |
| 47            | 1             | 0           | -0.133693               | 1.362949  | -1.903990 |
| 48            | 1             | 0           | -0.631039               | 2.925917  | 2.026328  |
| 49            | 1             | 0           | 0.212138                | 3.558900  | 0.606981  |
| 50            | 6             | 0           | -1.955851               | 3.366746  | -1.160739 |
| 51            | 6             | 0           | -2.535071               | 4.759884  | -0.905273 |
| 52            | 6             | 0           | -1.614764               | 5.579494  | 0.000367  |
| 53            | 6             | 0           | -1.355943               | 4.850537  | 1.319734  |
| 54            | 1             | 0           | -3.519144               | 4.660475  | -0.427726 |
| 55            | 1             | 0           | -2.693194               | 5.274100  | -1.858429 |

|    |    |   |           |           |           |    |   |   |           |           |           |
|----|----|---|-----------|-----------|-----------|----|---|---|-----------|-----------|-----------|
| 56 | 1  | 0 | -0.657509 | 5.742796  | -0.514073 | 21 | 1 | 0 | -0.237580 | -0.724636 | 4.473880  |
| 57 | 1  | 0 | -2.048350 | 6.566538  | 0.190662  | 22 | 1 | 0 | -1.837113 | 0.042229  | 4.676440  |
| 58 | 1  | 0 | -0.674391 | 5.428739  | 1.951781  | 23 | 1 | 0 | -1.653693 | -1.719805 | 4.941942  |
| 59 | 1  | 0 | -2.300771 | 4.755321  | 1.871422  | 24 | 7 | 0 | 1.126597  | 2.830043  | -0.531460 |
| 60 | 1  | 0 | -1.012140 | 3.475928  | -1.714796 | 25 | 6 | 0 | 1.279409  | 3.143754  | 0.899913  |
| 61 | 1  | 0 | -2.631688 | 2.780358  | -1.793891 | 26 | 6 | 0 | 0.291174  | 4.220982  | 1.386068  |
| 62 | 8  | 0 | 0.099744  | 0.997531  | -3.740126 | 27 | 6 | 0 | 0.302040  | 5.428506  | 0.446665  |
| 63 | 1  | 0 | 0.488454  | 0.151213  | -3.460972 | 28 | 6 | 0 | 0.994947  | 3.972290  | -1.442023 |
| 64 | 1  | 0 | -0.841732 | 0.803519  | -3.844522 | 29 | 6 | 0 | -0.090534 | 4.919851  | -0.942125 |
| 65 | 16 | 0 | 1.579836  | -1.949190 | -1.039640 | 30 | 1 | 0 | 2.298950  | 3.514016  | 1.071826  |
| 66 | 6  | 0 | 3.322597  | -1.678018 | -0.886794 | 31 | 1 | 0 | 1.138432  | 2.235620  | 1.489885  |
| 67 | 6  | 0 | 3.538557  | -0.842670 | 0.200427  | 32 | 1 | 0 | 0.614602  | 4.511433  | 2.390129  |
| 68 | 6  | 0 | 2.222706  | -0.484671 | 0.909264  | 33 | 6 | 0 | -1.144247 | 3.716747  | 1.510025  |
| 69 | 7  | 0 | 1.158310  | -1.290619 | 0.332087  | 34 | 1 | 0 | 1.298359  | 5.880941  | 0.406247  |
| 70 | 6  | 0 | 4.328807  | -2.135879 | -1.725265 | 35 | 1 | 0 | 1.951407  | 4.508350  | -1.509663 |
| 71 | 6  | 0 | 5.630235  | -1.742115 | -1.431313 | 36 | 1 | 0 | 0.752883  | 3.577734  | -2.428516 |
| 72 | 6  | 0 | 5.881600  | -0.915897 | -0.332345 | 37 | 6 | 0 | -1.475185 | 4.266081  | -0.915851 |
| 73 | 6  | 0 | 4.850816  | -0.463365 | 0.489280  | 38 | 1 | 0 | -0.156251 | 5.750995  | -1.651032 |
| 74 | 8  | 0 | 1.139464  | -1.225799 | -2.272145 | 39 | 7 | 0 | -1.631056 | 3.249952  | 0.179511  |
| 75 | 6  | 0 | 2.268011  | -0.777686 | 2.426571  | 40 | 1 | 0 | -1.802096 | 4.528157  | 1.832414  |
| 76 | 8  | 0 | 1.287759  | -1.030820 | 3.088693  | 41 | 1 | 0 | -1.232118 | 2.874825  | 2.194581  |
| 77 | 8  | 0 | 3.480024  | -0.647782 | 2.952258  | 42 | 1 | 0 | -2.238291 | 5.025835  | -0.729464 |
| 78 | 6  | 0 | 3.565446  | -0.821146 | 4.376803  | 43 | 1 | 0 | -0.400415 | 6.188313  | 0.805045  |
| 79 | 1  | 0 | 4.604755  | -0.624717 | 4.632934  | 44 | 1 | 0 | -1.708226 | 3.747739  | -1.847735 |
| 80 | 1  | 0 | 2.902959  | -0.115131 | 4.880577  | 45 | 1 | 0 | -2.623336 | 2.994122  | 0.221564  |
| 81 | 1  | 0 | 5.076989  | 0.165002  | 1.342409  | 46 | 6 | 0 | 1.449061  | 1.637368  | -1.095592 |
| 82 | 1  | 0 | 6.902320  | -0.623519 | -0.107606 | 47 | 8 | 0 | 1.611448  | 1.495459  | -2.305424 |
| 83 | 1  | 0 | 6.452675  | -2.080066 | -2.053076 | 48 | 6 | 0 | 1.609515  | 0.418521  | -0.184330 |
| 84 | 1  | 0 | 4.103551  | -2.779381 | -2.570094 | 49 | 6 | 0 | 3.050582  | 0.296201  | 0.357633  |
| 85 | 8  | 0 | 1.220985  | -3.379856 | -1.110893 | 50 | 7 | 0 | 1.243892  | -0.713863 | -1.043010 |
| 86 | 1  | 0 | 3.290781  | -1.842429 | 4.645294  | 51 | 1 | 0 | 3.340799  | 1.301896  | 0.697151  |
| 87 | 8  | 0 | -1.282411 | -2.198819 | -3.342529 | 52 | 6 | 0 | 3.086040  | -0.641549 | 1.569990  |
| 88 | 1  | 0 | -0.331008 | -2.107354 | -3.159233 | 53 | 1 | 0 | 0.896534  | 0.477962  | 0.633656  |
| 89 | 1  | 0 | -1.636407 | -1.347018 | -3.037203 | 54 | 6 | 0 | 0.425982  | -1.683750 | -0.818586 |
| 90 | 8  | 0 | -1.576888 | -2.992312 | -0.708858 | 55 | 6 | 0 | -0.241027 | -1.829647 | 0.519228  |
| 91 | 1  | 0 | -1.570441 | -2.838348 | -1.674844 | 56 | 6 | 0 | -0.569014 | -3.301761 | 0.822136  |
| 92 | 1  | 0 | -0.684321 | -3.329565 | -0.534914 | 57 | 6 | 0 | -1.165117 | -4.072710 | -0.355425 |
| 93 | 8  | 0 | -1.170273 | -1.388024 | 1.761299  | 58 | 6 | 0 | 0.077631  | -2.592394 | -1.953014 |
| 94 | 1  | 0 | -0.440128 | -1.453377 | 1.098562  | 59 | 6 | 0 | -0.208404 | -4.037822 | -1.542342 |
| 95 | 1  | 0 | -0.660198 | -1.351818 | 2.581709  | 60 | 1 | 0 | 0.503320  | -1.514865 | 1.257345  |
|    |    |   |           |           |           | 61 | 1 | 0 | 0.376128  | -3.782277 | 1.097516  |
|    |    |   |           |           |           | 62 | 1 | 0 | -1.208847 | -3.348566 | 1.705384  |
|    |    |   |           |           |           | 63 | 1 | 0 | -2.131501 | -3.650510 | -0.652792 |
|    |    |   |           |           |           | 64 | 1 | 0 | -1.349034 | -5.106994 | -0.048082 |
|    |    |   |           |           |           | 65 | 1 | 0 | -0.637807 | -4.559751 | -2.401774 |
|    |    |   |           |           |           | 66 | 1 | 0 | 0.732940  | -4.527172 | -1.280298 |
|    |    |   |           |           |           | 67 | 1 | 0 | -0.834879 | -2.142765 | -2.375186 |
|    |    |   |           |           |           | 68 | 1 | 0 | 0.852140  | -2.527022 | -2.722965 |
|    |    |   |           |           |           | 69 | 1 | 0 | 1.598295  | -0.604754 | -1.995955 |
|    |    |   |           |           |           | 70 | 1 | 0 | 2.396167  | -0.266629 | 2.338141  |
|    |    |   |           |           |           | 71 | 1 | 0 | 2.737416  | -1.632507 | 1.251561  |
|    |    |   |           |           |           | 72 | 6 | 0 | 4.044927  | -0.144850 | -0.722798 |
|    |    |   |           |           |           | 73 | 6 | 0 | 5.455978  | -0.303024 | -0.152977 |
|    |    |   |           |           |           | 74 | 6 | 0 | 5.459843  | -1.263397 | 1.038534  |
|    |    |   |           |           |           | 75 | 6 | 0 | 4.503595  | -0.776334 | 2.128196  |
|    |    |   |           |           |           | 76 | 1 | 0 | 5.834895  | 0.675608  | 0.170761  |
|    |    |   |           |           |           | 77 | 1 | 0 | 6.132838  | -0.657421 | -0.939469 |
|    |    |   |           |           |           | 78 | 1 | 0 | 5.123847  | -2.254758 | 0.701929  |
|    |    |   |           |           |           | 79 | 1 | 0 | 6.473345  | -1.377395 | 1.436382  |
|    |    |   |           |           |           | 80 | 1 | 0 | 4.506133  | -1.467489 | 2.977409  |
|    |    |   |           |           |           | 81 | 1 | 0 | 4.847718  | 0.196653  | 2.504574  |
|    |    |   |           |           |           | 82 | 1 | 0 | 3.728499  | -1.118807 | -1.117181 |
|    |    |   |           |           |           | 83 | 1 | 0 | 4.037228  | 0.565644  | -1.557344 |
|    |    |   |           |           |           | 84 | 8 | 0 | 4.848332  | -3.299319 | -1.826620 |
|    |    |   |           |           |           | 85 | 1 | 0 | 3.349336  | -3.362693 | -0.781262 |
|    |    |   |           |           |           | 86 | 1 | 0 | 5.639952  | -2.939530 | -1.403543 |
|    |    |   |           |           |           | 87 | 8 | 0 | 2.577702  | -3.411834 | -0.184899 |
|    |    |   |           |           |           | 88 | 1 | 0 | 2.699917  | -4.236289 | 0.302988  |
|    |    |   |           |           |           | 89 | 1 | 0 | -1.182898 | 2.335666  | -0.047301 |

### 3-IM3'

Zero-point correction = 0.77821 a.u.

Thermal correction to Gibbs Free Energy = 0.70286 a.u.

Sum of electronic and zero-point Energies = -2313.60646 a.u.

Sum of electronic and thermal Free Energies = -2313.68180 a.u.

Standard orientation:

| Center Number | Atomic Number | Atomic Type | Coordinates (Angstroms) |           |           |
|---------------|---------------|-------------|-------------------------|-----------|-----------|
|               |               |             | X                       | Y         | Z         |
| 1             | 1             | 0           | 4.770945                | -2.815171 | -2.660044 |
| 2             | 16            | 0           | -2.362836               | 0.340741  | -1.431148 |
| 3             | 6             | 0           | -3.449845               | -0.866547 | -0.717952 |
| 4             | 6             | 0           | -2.858575               | -1.370781 | 0.432605  |
| 5             | 6             | 0           | -1.462284               | -0.755017 | 0.654147  |
| 6             | 7             | 0           | -1.321257               | 0.385319  | -0.229976 |
| 7             | 6             | 0           | -4.691409               | -1.268308 | -1.188349 |
| 8             | 6             | 0           | -5.384061               | -2.216858 | -0.442182 |
| 9             | 6             | 0           | -4.829397               | -2.717049 | 0.738077  |
| 10            | 6             | 0           | -3.575760               | -2.303032 | 1.186806  |
| 11            | 8             | 0           | -1.854484               | -0.179643 | -2.716103 |
| 12            | 1             | 0           | -3.183737               | -2.696855 | 2.115347  |
| 13            | 1             | 0           | -5.386076               | -3.441201 | 1.324483  |
| 14            | 1             | 0           | -6.360590               | -2.557795 | -0.769950 |
| 15            | 1             | 0           | -5.107711               | -0.846879 | -2.098225 |
| 16            | 8             | 0           | -3.040359               | 1.650778  | -1.573798 |
| 17            | 6             | 0           | -1.249005               | -0.269696 | 2.095175  |
| 18            | 8             | 0           | -0.686724               | 0.761593  | 2.390061  |
| 19            | 8             | 0           | -1.632727               | -1.169685 | 2.995037  |
| 20            | 6             | 0           | -1.314891               | -0.863106 | 4.362693  |

### 3-TS2'

Zero-point correction = 0.77895 a.u.  
 Thermal correction to Gibbs Free Energy = 0.71056 a.u.  
 Sum of electronic and zero-point Energies = -2313.57291 a.u.  
 Sum of electronic and thermal Free Energies = -2313.64130 a.u.

Standard orientation:

| Center Number | Atomic Number | Atomic Type | Coordinates (Angstroms) |           |           |
|---------------|---------------|-------------|-------------------------|-----------|-----------|
|               |               |             | X                       | Y         | Z         |
| 1             | 1             | 0           | 1.767509                | -2.868865 | -1.788662 |
| 2             | 16            | 0           | -1.895542               | 1.082631  | -1.523767 |
| 3             | 6             | 0           | -3.429119               | 0.643103  | -0.746089 |
| 4             | 6             | 0           | -3.152064               | -0.018562 | 0.441244  |
| 5             | 6             | 0           | -1.624686               | -0.221712 | 0.631818  |
| 6             | 7             | 0           | -0.942696               | 0.592754  | -0.356321 |
| 7             | 6             | 0           | -4.711138               | 0.942582  | -1.184724 |
| 8             | 6             | 0           | -5.774083               | 0.573254  | -0.366594 |
| 9             | 6             | 0           | -5.524083               | -0.051254 | 0.857592  |
| 10            | 6             | 0           | -4.226784               | -0.344269 | 1.274580  |
| 11            | 8             | 0           | -1.774275               | 0.364638  | -2.809114 |
| 12            | 1             | 0           | -4.073600               | -0.804344 | 2.242277  |
| 13            | 1             | 0           | -6.356247               | -0.308427 | 1.505346  |
| 14            | 1             | 0           | -6.794056               | 0.789381  | -0.667384 |
| 15            | 1             | 0           | -4.871554               | 1.458722  | -2.126546 |
| 16            | 8             | 0           | -1.820985               | 2.554196  | -1.694413 |
| 17            | 6             | 0           | -1.230084               | 0.284896  | 2.029437  |
| 18            | 8             | 0           | -0.360358               | 1.095531  | 2.251667  |
| 19            | 8             | 0           | -1.894839               | -0.342998 | 2.999113  |
| 20            | 6             | 0           | -1.523136               | 0.004611  | 4.341449  |
| 21            | 1             | 0           | -0.466826               | -0.214820 | 4.508909  |
| 22            | 1             | 0           | -1.712202               | 1.064141  | 4.522510  |
| 23            | 1             | 0           | -2.147745               | -0.609232 | 4.987553  |
| 24            | 7             | 0           | 2.218823                | 1.816988  | -0.458459 |
| 25            | 6             | 0           | 2.483663                | 2.068850  | 0.966082  |
| 26            | 6             | 0           | 2.110612                | 3.505200  | 1.399618  |
| 27            | 6             | 0           | 2.701258                | 4.536010  | 0.434527  |
| 28            | 6             | 0           | 2.657755                | 2.863561  | -1.387852 |
| 29            | 6             | 0           | 2.129556                | 4.223189  | -0.950282 |
| 30            | 1             | 0           | 3.556101                | 1.932417  | 1.162117  |
| 31            | 1             | 0           | 1.924931                | 1.350780  | 1.569227  |
| 32            | 1             | 0           | 2.518117                | 3.641497  | 2.405721  |
| 33            | 6             | 0           | 0.607124                | 3.758601  | 1.487248  |
| 34            | 1             | 0           | 3.793818                | 4.465862  | 0.404879  |
| 35            | 1             | 0           | 3.756304                | 2.888659  | -1.412748 |
| 36            | 1             | 0           | 2.293664                | 2.598311  | -2.378156 |
| 37            | 6             | 0           | 0.597615                | 4.272211  | -0.952472 |
| 38            | 1             | 0           | 2.462910                | 4.965881  | -1.682023 |
| 39            | 7             | 0           | -0.023016               | 3.475955  | 0.164608  |
| 40            | 1             | 0           | 0.418870                | 4.812099  | 1.711348  |
| 41            | 1             | 0           | 0.115140                | 3.134543  | 2.226499  |
| 42            | 1             | 0           | 0.256004                | 5.300024  | -0.805709 |
| 43            | 1             | 0           | 2.436232                | 5.547701  | 0.759440  |
| 44            | 1             | 0           | 0.173488                | 3.881007  | -1.878089 |
| 45            | 1             | 0           | -1.022824               | 3.700743  | 0.179898  |
| 46            | 6             | 0           | 1.812704                | 0.640661  | -1.016288 |
| 47            | 8             | 0           | 1.684807                | 0.527456  | -2.233792 |
| 48            | 6             | 0           | 1.609274                | -0.607222 | -0.140635 |
| 49            | 6             | 0           | 2.997125                | -1.107190 | 0.322735  |
| 50            | 7             | 0           | 0.855190                | -1.553934 | -0.992950 |
| 51            | 1             | 0           | 3.387521                | -0.307900 | 0.968323  |
| 52            | 6             | 0           | 2.922274                | -2.361709 | 1.197078  |
| 53            | 1             | 0           | 1.031734                | -0.340029 | 0.746195  |
| 54            | 6             | 0           | -0.315211               | -2.267342 | -0.521797 |
| 55            | 6             | 0           | -1.119763               | -1.752400 | 0.697347  |
| 56            | 6             | 0           | -2.237565               | -2.771382 | 1.021436  |
| 57            | 6             | 0           | -3.118315               | -3.149507 | -0.175034 |
| 58            | 6             | 0           | -1.201968               | -2.622064 | -1.714854 |
| 59            | 6             | 0           | -2.287364               | -3.639320 | -1.358964 |
| 60            | 1             | 0           | -0.409087               | -1.802783 | 1.530750  |
| 61            | 1             | 0           | -1.779338               | -3.681745 | 1.432017  |
| 62            | 1             | 0           | -2.841878               | -2.385174 | 1.842731  |
| 63            | 1             | 0           | -3.705924               | -2.285455 | -0.499823 |

|    |   |   |           |           |           |
|----|---|---|-----------|-----------|-----------|
| 64 | 1 | 0 | -3.830995 | -3.919628 | 0.136654  |
| 65 | 1 | 0 | -2.925391 | -3.792358 | -2.233519 |
| 66 | 1 | 0 | -1.844577 | -4.621813 | -1.140829 |
| 67 | 1 | 0 | -1.658038 | -1.691633 | -2.068832 |
| 68 | 1 | 0 | -0.566266 | -2.995299 | -2.526102 |
| 69 | 1 | 0 | 0.582734  | -1.019281 | -1.822773 |
| 70 | 1 | 0 | 2.179058  | -2.222064 | 1.992366  |
| 71 | 1 | 0 | 2.582244  | -3.210872 | 0.594135  |
| 72 | 6 | 0 | 4.024495  | -1.290128 | -0.801949 |
| 73 | 6 | 0 | 5.397798  | -1.649789 | -0.226876 |
| 74 | 6 | 0 | 5.327051  | -2.886149 | 0.671531  |
| 75 | 6 | 0 | 4.293846  | -2.701202 | 1.784342  |
| 76 | 1 | 0 | 5.767885  | -0.799482 | 0.362024  |
| 77 | 1 | 0 | 6.114077  | -1.808101 | -1.039698 |
| 78 | 1 | 0 | 5.044924  | -3.758143 | 0.063707  |
| 79 | 1 | 0 | 6.312463  | -3.103205 | 1.096671  |
| 80 | 1 | 0 | 4.227112  | -3.605758 | 2.397862  |
| 81 | 1 | 0 | 4.616548  | -1.887006 | 2.447084  |
| 82 | 1 | 0 | 3.706460  | -2.090468 | -1.483846 |
| 83 | 1 | 0 | 4.097818  | -0.380573 | -1.408215 |
| 84 | 8 | 0 | 1.760342  | -3.881425 | -1.828717 |
| 85 | 1 | 0 | 1.037278  | -3.940779 | -0.867497 |
| 86 | 1 | 0 | 2.660248  | -4.230701 | -1.709594 |
| 87 | 8 | 0 | 0.280599  | -3.564634 | -0.014151 |
| 88 | 1 | 0 | -0.405616 | -4.217914 | 0.207278  |
| 89 | 1 | 0 | -0.021536 | 2.452365  | -0.028034 |

### 3-IM4'

Zero-point correction = 0.78284 a.u.  
 Thermal correction to Gibbs Free Energy = 0.71228 a.u.  
 Sum of electronic and zero-point Energies = -2313.60477 a.u.  
 Sum of electronic and thermal Free Energies = -2313.67532 a.u.

Standard orientation:

| Center Number | Atomic Number | Atomic Type | Coordinates (Angstroms) |           |           |
|---------------|---------------|-------------|-------------------------|-----------|-----------|
|               |               |             | X                       | Y         | Z         |
| 1             | 1             | 0           | 1.406178                | -2.224326 | -1.255394 |
| 2             | 16            | 0           | -1.642340               | 0.865209  | -1.669190 |
| 3             | 6             | 0           | -3.272922               | 0.455474  | -1.108268 |
| 4             | 6             | 0           | -3.184805               | -0.048271 | 0.182314  |
| 5             | 6             | 0           | -1.713219               | -0.145446 | 0.650668  |
| 6             | 7             | 0           | -0.895972               | 0.610976  | -0.289244 |
| 7             | 6             | 0           | -4.464850               | 0.639381  | -1.795145 |
| 8             | 6             | 0           | -5.643076               | 0.315037  | -1.131760 |
| 9             | 6             | 0           | -5.592175               | -0.162797 | 0.180037  |
| 10            | 6             | 0           | -4.380850               | -0.346650 | 0.844184  |
| 11            | 8             | 0           | -1.256114               | -0.057574 | -2.760120 |
| 12            | 1             | 0           | -4.388941               | -0.706138 | 1.864863  |
| 13            | 1             | 0           | -6.516267               | -0.393147 | 0.700844  |
| 14            | 1             | 0           | -6.600345               | 0.447053  | -1.625263 |
| 15            | 1             | 0           | -4.471136               | 1.035236  | -2.806176 |
| 16            | 8             | 0           | -1.567415               | 2.290244  | -2.058753 |
| 17            | 6             | 0           | -1.497134               | 0.483484  | 2.038180  |
| 18            | 8             | 0           | -0.464770               | 1.027296  | 2.365957  |
| 19            | 8             | 0           | -2.494662               | 0.259898  | 2.885562  |
| 20            | 6             | 0           | -2.274941               | 0.688396  | 4.239488  |
| 21            | 1             | 0           | -1.406086               | 0.176112  | 4.656985  |
| 22            | 1             | 0           | -2.116860               | 1.767704  | 4.271950  |
| 23            | 1             | 0           | -3.178081               | 0.418257  | 4.783115  |
| 24            | 7             | 0           | 2.188354                | 1.848104  | -0.360808 |
| 25            | 6             | 0           | 2.387563                | 2.142186  | 1.064009  |
| 26            | 6             | 0           | 1.939398                | 3.571095  | 1.434089  |
| 27            | 6             | 0           | 2.553079                | 4.594878  | 0.475787  |
| 28            | 6             | 0           | 2.630017                | 2.877837  | -1.309343 |
| 29            | 6             | 0           | 2.063812                | 4.241113  | -0.930555 |
| 30            | 1             | 0           | 3.455092                | 2.050714  | 1.305392  |
| 31            | 1             | 0           | 1.828416                | 1.419595  | 1.660752  |
| 32            | 1             | 0           | 2.279389                | 3.751441  | 2.458319  |
| 33            | 6             | 0           | 0.424632                | 3.764912  | 1.432925  |
| 34            | 1             | 0           | 3.646811                | 4.550294  | 0.507573  |



|    |   |   |           |           |           |    |   |   |           |           |           |
|----|---|---|-----------|-----------|-----------|----|---|---|-----------|-----------|-----------|
| 35 | 1 | 0 | 3.727564  | 2.924128  | -1.299041 | 6  | 7 | 0 | -0.993237 | 0.453986  | -0.323867 |
| 36 | 1 | 0 | 2.302666  | 2.573045  | -2.301614 | 7  | 6 | 0 | -4.231924 | -0.801208 | -2.070840 |
| 37 | 6 | 0 | 0.535855  | 4.279771  | -1.013504 | 8  | 6 | 0 | -5.324456 | -1.365756 | -1.422679 |
| 38 | 1 | 0 | 2.430260  | 4.969466  | -1.660593 | 9  | 6 | 0 | -5.262043 | -1.647485 | -0.053755 |
| 39 | 7 | 0 | -0.131565 | 3.482315  | 0.074133  | 10 | 6 | 0 | -4.108082 | -1.400520 | 0.684278  |
| 40 | 1 | 0 | 0.182623  | 4.805571  | 1.665466  | 11 | 8 | 0 | -0.830206 | -0.736948 | -2.621679 |
| 41 | 1 | 0 | -0.080601 | 3.104549  | 2.133404  | 12 | 1 | 0 | -4.097164 | -1.603283 | 1.751369  |
| 42 | 1 | 0 | 0.181970  | 5.306068  | -0.887729 | 13 | 1 | 0 | -6.133820 | -2.055790 | 0.447170  |
| 43 | 1 | 0 | 2.247878  | 5.607186  | 0.761068  | 14 | 1 | 0 | -6.236958 | -1.565843 | -1.974105 |
| 44 | 1 | 0 | 0.163106  | 3.880635  | -1.957542 | 15 | 1 | 0 | -4.266720 | -0.537553 | -3.123233 |
| 45 | 1 | 0 | -1.129783 | 3.712254  | 0.053455  | 16 | 8 | 0 | -1.855974 | 1.527877  | -2.462504 |
| 46 | 6 | 0 | 1.805878  | 0.657280  | -0.885484 | 17 | 6 | 0 | -2.003960 | 0.388671  | 1.908976  |
| 47 | 8 | 0 | 1.674123  | 0.487150  | -2.095460 | 18 | 8 | 0 | -1.539169 | 0.222382  | 3.011347  |
| 48 | 6 | 0 | 1.649979  | -0.568827 | 0.028398  | 19 | 8 | 0 | -2.913278 | 1.322372  | 1.630316  |
| 49 | 6 | 0 | 3.065798  | -1.079586 | 0.376947  | 20 | 6 | 0 | -3.410649 | 2.063325  | 2.758553  |
| 50 | 7 | 0 | 0.800978  | -1.520095 | -0.785431 | 21 | 1 | 0 | -3.909976 | 1.383445  | 3.451807  |
| 51 | 1 | 0 | 3.481266  | -0.270301 | 0.996239  | 22 | 1 | 0 | -2.596454 | 2.575347  | 3.274389  |
| 52 | 6 | 0 | 3.098795  | -2.347035 | 1.237332  | 23 | 1 | 0 | -4.120611 | 2.779794  | 2.349979  |
| 53 | 1 | 0 | 1.098110  | -0.327469 | 0.936300  | 24 | 7 | 0 | 1.686685  | 2.289208  | -0.440584 |
| 54 | 6 | 0 | -0.310838 | -2.334471 | -0.161297 | 25 | 6 | 0 | 1.945508  | 2.677085  | 0.946706  |
| 55 | 6 | 0 | -1.158158 | -1.625239 | 0.926840  | 26 | 6 | 0 | 1.002477  | 3.794185  | 1.405308  |
| 56 | 6 | 0 | -2.234832 | -2.631800 | 1.401900  | 27 | 6 | 0 | 1.098722  | 4.981124  | 0.446903  |
| 57 | 6 | 0 | -3.046935 | -3.294964 | 0.281471  | 28 | 6 | 0 | 1.598564  | 3.388114  | -1.408748 |
| 58 | 6 | 0 | -1.152936 | -2.897556 | -1.308105 | 29 | 6 | 0 | 0.647163  | 4.482116  | -0.925720 |
| 59 | 6 | 0 | -2.148407 | -3.929012 | -0.778386 | 30 | 1 | 0 | 2.981673  | 3.033319  | 1.029735  |
| 60 | 1 | 0 | -0.454782 | -1.518018 | 1.761636  | 31 | 1 | 0 | 1.835298  | 1.815075  | 1.606178  |
| 61 | 1 | 0 | -1.739123 | -3.414302 | 1.990966  | 32 | 1 | 0 | 1.321365  | 4.086404  | 2.411089  |
| 62 | 1 | 0 | -2.892500 | -2.128239 | 2.113776  | 33 | 6 | 0 | -0.452934 | 3.338443  | 1.517394  |
| 63 | 1 | 0 | -3.685790 | -2.557760 | -0.212602 | 34 | 1 | 0 | 2.128713  | 5.351527  | 0.400001  |
| 64 | 1 | 0 | -3.709809 | -4.045713 | 0.722985  | 35 | 1 | 0 | 2.600124  | 3.815459  | -1.553040 |
| 65 | 1 | 0 | -2.750181 | -4.303841 | -1.610432 | 36 | 1 | 0 | 1.262735  | 2.964534  | -2.354604 |
| 66 | 1 | 0 | -1.617459 | -4.799504 | -0.370772 | 37 | 6 | 0 | -0.809749 | 4.027331  | -0.853591 |
| 67 | 1 | 0 | -1.688544 | -2.075300 | -1.791868 | 38 | 1 | 0 | 0.689396  | 5.293121  | -1.660243 |
| 68 | 1 | 0 | -0.479738 | -3.342318 | -2.048927 | 39 | 7 | 0 | -1.058911 | 3.002646  | 0.200706  |
| 69 | 1 | 0 | 0.392190  | -0.952728 | -1.551493 | 40 | 1 | 0 | -1.036190 | 4.138659  | 1.988741  |
| 70 | 1 | 0 | 2.413428  | -2.247546 | 2.086421  | 41 | 1 | 0 | -0.514569 | 2.450155  | 2.155756  |
| 71 | 1 | 0 | 2.745510  | -3.195279 | 0.642514  | 42 | 1 | 0 | -1.431606 | 4.902762  | -0.630706 |
| 72 | 6 | 0 | 3.999033  | -1.235474 | -0.835091 | 43 | 1 | 0 | 0.460306  | 5.802250  | 0.791020  |
| 73 | 6 | 0 | 5.424850  | -1.557390 | -0.378756 | 44 | 1 | 0 | -1.140452 | 3.595960  | -1.800033 |
| 74 | 6 | 0 | 5.470752  | -2.792405 | 0.520562  | 45 | 1 | 0 | -2.071281 | 2.982882  | 0.337598  |
| 75 | 6 | 0 | 4.524464  | -2.635769 | 1.712199  | 46 | 6 | 0 | 1.681378  | 1.028818  | -0.922612 |
| 76 | 1 | 0 | 5.821276  | -0.694869 | 0.174605  | 47 | 8 | 0 | 1.565367  | 0.768851  | -2.118177 |
| 77 | 1 | 0 | 6.069155  | -1.695999 | -1.253086 | 48 | 6 | 0 | 1.899059  | -0.139959 | 0.046806  |
| 78 | 1 | 0 | 5.168914  | -3.674302 | -0.062044 | 49 | 6 | 0 | 3.418657  | -0.288377 | 0.288704  |
| 79 | 1 | 0 | 6.494373  | -2.974035 | 0.864783  | 50 | 7 | 0 | 1.245503  | -1.332632 | -0.605115 |
| 80 | 1 | 0 | 4.533742  | -3.539912 | 2.329635  | 51 | 1 | 0 | 3.718886  | 0.686660  | 0.700721  |
| 81 | 1 | 0 | 4.872015  | -1.809808 | 2.347777  | 52 | 6 | 0 | 3.778078  | -1.339489 | 1.344437  |
| 82 | 1 | 0 | 3.629848  | -2.044469 | -1.480132 | 53 | 1 | 0 | 1.389556  | 0.024836  | 0.995898  |
| 83 | 1 | 0 | 4.006501  | -0.325798 | -1.442940 | 54 | 6 | 0 | 0.340910  | -2.260623 | 0.216381  |
| 84 | 8 | 0 | 1.916847  | -3.926454 | -1.817411 | 55 | 6 | 0 | -0.685303 | -1.585522 | 1.160844  |
| 85 | 1 | 0 | 1.629018  | -4.361664 | -1.001377 | 56 | 6 | 0 | -1.421417 | -2.739029 | 1.896084  |
| 86 | 1 | 0 | 2.796859  | -4.274081 | -2.014576 | 57 | 6 | 0 | -1.984199 | -3.846123 | 0.994011  |
| 87 | 8 | 0 | 0.414941  | -3.370275 | 0.475954  | 58 | 6 | 0 | -0.297286 | -3.246784 | -0.764148 |
| 88 | 1 | 0 | -0.202905 | -4.000433 | 0.872677  | 59 | 6 | 0 | -0.947996 | -4.391417 | 0.013172  |
| 89 | 1 | 0 | -0.120921 | 2.454364  | -0.109082 | 60 | 1 | 0 | -0.086771 | -1.080056 | 1.926772  |
|    |   |   |           |           |           | 61 | 1 | 0 | -0.706909 | -3.189979 | 2.590690  |
|    |   |   |           |           |           | 62 | 1 | 0 | -2.209520 | -2.313245 | 2.522531  |
|    |   |   |           |           |           | 63 | 1 | 0 | -2.837704 | -3.478655 | 0.419021  |
|    |   |   |           |           |           | 64 | 1 | 0 | -2.360759 | -4.651324 | 1.633336  |
|    |   |   |           |           |           | 65 | 1 | 0 | -1.424487 | -5.077101 | -0.693101 |
|    |   |   |           |           |           | 66 | 1 | 0 | -0.173663 | -4.953341 | 0.543703  |
|    |   |   |           |           |           | 67 | 1 | 0 | -1.041181 | -2.717725 | -1.366159 |
|    |   |   |           |           |           | 68 | 1 | 0 | 0.473596  | -3.622640 | -1.444177 |
|    |   |   |           |           |           | 69 | 1 | 0 | 0.732990  | -0.994769 | -1.444369 |
|    |   |   |           |           |           | 70 | 1 | 0 | 3.193967  | -1.165068 | 2.258707  |
|    |   |   |           |           |           | 71 | 1 | 0 | 3.521666  | -2.334697 | 0.964888  |
|    |   |   |           |           |           | 72 | 6 | 0 | 4.236886  | -0.499467 | -0.995188 |
|    |   |   |           |           |           | 73 | 6 | 0 | 5.736997  | -0.507214 | -0.686022 |
|    |   |   |           |           |           | 74 | 6 | 0 | 6.089132  | -1.544727 | 0.380119  |
|    |   |   |           |           |           | 75 | 6 | 0 | 5.276286  | -1.311961 | 1.653530  |
|    |   |   |           |           |           | 76 | 1 | 0 | 6.033300  | 0.488550  | -0.329359 |
|    |   |   |           |           |           | 77 | 1 | 0 | 6.299237  | -0.696207 | -1.606018 |

### 3-TS3'

Zero-point correction = 0.77891 a.u.

Thermal correction to Gibbs Free Energy = 0.71067 a.u.

Sum of electronic and zero-point Energies = -2313.61244 a.u.

Sum of electronic and thermal Free Energies = -2313.68068 a.u.

Standard orientation:

| Center Number | Atomic Number | Atomic Type | Coordinates (Angstroms) |           |           |
|---------------|---------------|-------------|-------------------------|-----------|-----------|
|               |               |             | X                       | Y         | Z         |
| 1             | 1             | 0           | 1.973638                | -1.979631 | -0.965819 |
| 2             | 16            | 0           | -1.606848               | 0.231424  | -1.829981 |
| 3             | 6             | 0           | -3.098131               | -0.558648 | -1.305994 |
| 4             | 6             | 0           | -2.990329               | -0.874128 | 0.035586  |
| 5             | 6             | 0           | -1.641515               | -0.449350 | 0.651496  |

|    |   |   |           |           |           |    |   |   |           |           |           |
|----|---|---|-----------|-----------|-----------|----|---|---|-----------|-----------|-----------|
| 78 | 1 | 0 | 5.868645  | -2.550012 | -0.006479 | 49 | 6 | 0 | 3.390768  | -0.427196 | 0.294770  |
| 79 | 1 | 0 | 7.161205  | -1.515963 | 0.599897  | 50 | 7 | 0 | 1.183816  | -1.398302 | -0.579582 |
| 80 | 1 | 0 | 5.512816  | -2.070096 | 2.406959  | 51 | 1 | 0 | 3.728693  | 0.530786  | 0.715311  |
| 81 | 1 | 0 | 5.542486  | -0.336755 | 2.082566  | 52 | 6 | 0 | 3.722280  | -1.504442 | 1.332467  |
| 82 | 1 | 0 | 3.964585  | -1.458833 | -1.454359 | 53 | 1 | 0 | 1.381927  | -0.047932 | 1.024993  |
| 83 | 1 | 0 | 4.009765  | 0.279765  | -1.728108 | 54 | 6 | 0 | 0.238738  | -2.295848 | 0.233157  |
| 84 | 8 | 0 | 2.838250  | -3.669226 | -1.175527 | 55 | 6 | 0 | -0.768108 | -1.593306 | 1.181093  |
| 85 | 1 | 0 | 2.650564  | -4.023134 | -0.293702 | 56 | 6 | 0 | -1.549400 | -2.724171 | 1.901659  |
| 86 | 1 | 0 | 3.763746  | -3.879598 | -1.359309 | 57 | 6 | 0 | -2.153213 | -3.796098 | 0.983301  |
| 87 | 8 | 0 | 1.216741  | -3.011712 | 1.016824  | 58 | 6 | 0 | -0.434932 | -3.244173 | -0.759576 |
| 88 | 1 | 0 | 1.445960  | -2.519820 | 1.821720  | 59 | 6 | 0 | -1.133735 | -4.370963 | 0.001698  |
| 89 | 1 | 0 | -0.923052 | 1.708041  | -0.098353 | 60 | 1 | 0 | -0.155521 | -1.113004 | 1.952239  |

### 3-IM5'

Zero-point correction = 0.78141 a.u.

Thermal correction to Gibbs Free Energy = 0.71079 a.u.

Sum of electronic and zero-point Energies = -2313.61303 a.u.

Sum of electronic and thermal Free Energies = -2313.68366 a.u.

Standard orientation:

| Center Number | Atomic Number | Atomic Type | Coordinates (Angstroms) |           |           |
|---------------|---------------|-------------|-------------------------|-----------|-----------|
|               |               |             | X                       | Y         | Z         |
| 1             | 1             | 0           | 1.889228                | -2.074640 | -0.933608 |
| 2             | 16            | 0           | -1.675996               | 0.265362  | -1.861152 |
| 3             | 6             | 0           | -3.175224               | -0.456874 | -1.274666 |
| 4             | 6             | 0           | -3.050486               | -0.777143 | 0.065757  |
| 5             | 6             | 0           | -1.676197               | -0.424032 | 0.667112  |
| 6             | 7             | 0           | -0.983206               | 0.398005  | -0.345657 |
| 7             | 6             | 0           | -4.338222               | -0.643986 | -2.011532 |
| 8             | 6             | 0           | -5.440732               | -1.154185 | -1.337005 |
| 9             | 6             | 0           | -5.360274               | -1.435226 | 0.030726  |
| 10            | 6             | 0           | -4.178626               | -1.244962 | 0.740725  |
| 11            | 8             | 0           | -0.961489               | -0.721119 | -2.672889 |
| 12            | 1             | 0           | -4.153310               | -1.443221 | 1.808265  |
| 13            | 1             | 0           | -6.239264               | -1.796649 | 0.554417  |
| 14            | 1             | 0           | -6.374239               | -1.309557 | -1.866897 |
| 15            | 1             | 0           | -4.385932               | -0.379995 | -3.063271 |
| 16            | 8             | 0           | -1.867777               | 1.598039  | -2.420184 |
| 17            | 6             | 0           | -1.985836               | 0.471178  | 1.899159  |
| 18            | 8             | 0           | -1.586593               | 0.262933  | 3.018462  |
| 19            | 8             | 0           | -2.783409               | 1.481920  | 1.568270  |
| 20            | 6             | 0           | -3.258869               | 2.292118  | 2.658462  |
| 21            | 1             | 0           | -3.937345               | 1.703010  | 3.279145  |
| 22            | 1             | 0           | -2.426559               | 2.652005  | 3.264768  |
| 23            | 1             | 0           | -3.789722               | 3.122836  | 2.197202  |
| 24            | 7             | 0           | 1.821240                | 2.205068  | -0.432295 |
| 25            | 6             | 0           | 2.078525                | 2.576633  | 0.961737  |
| 26            | 6             | 0           | 1.249577                | 3.789062  | 1.404411  |
| 27            | 6             | 0           | 1.472625                | 4.947879  | 0.431773  |
| 28            | 6             | 0           | 1.800165                | 3.300380  | -1.410746 |
| 29            | 6             | 0           | 0.961727                | 4.485419  | -0.933300 |
| 30            | 1             | 0           | 3.143910                | 2.821575  | 1.072692  |
| 31            | 1             | 0           | 1.861086                | 1.731023  | 1.616454  |
| 32            | 1             | 0           | 1.601667                | 4.057815  | 2.406064  |
| 33            | 6             | 0           | -0.249871               | 3.497533  | 1.506107  |
| 34            | 1             | 0           | 2.536478                | 5.206646  | 0.378649  |
| 35            | 1             | 0           | 2.833240                | 3.634176  | -1.579531 |
| 36            | 1             | 0           | 1.413095                | 2.894212  | -2.344660 |
| 37            | 6             | 0           | -0.533359               | 4.173018  | -0.841011 |
| 38            | 1             | 0           | 1.085659                | 5.279817  | -1.676920 |
| 39            | 7             | 0           | -0.834390               | 3.166671  | 0.195637  |
| 40            | 1             | 0           | -0.736953               | 4.381204  | 1.948510  |
| 41            | 1             | 0           | -0.418894               | 2.652458  | 2.185521  |
| 42            | 1             | 0           | -1.059841               | 5.115461  | -0.622959 |
| 43            | 1             | 0           | 0.925889                | 5.835697  | 0.768332  |
| 44            | 1             | 0           | -0.907621               | 3.785384  | -1.792500 |
| 45            | 1             | 0           | -1.847518               | 3.145355  | 0.301448  |
| 46            | 6             | 0           | 1.690697                | 0.950902  | -0.899783 |
| 47            | 8             | 0           | 1.496360                | 0.688119  | -2.087642 |
| 48            | 6             | 0           | 1.875385                | -0.227259 | 0.069725  |

|    |   |   |           |           |           |
|----|---|---|-----------|-----------|-----------|
| 61 | 1 | 0 | -0.853049 | -3.210976 | 2.589929  |
| 62 | 1 | 0 | -2.319540 | -2.271641 | 2.531089  |
| 63 | 1 | 0 | -2.987445 | -3.386190 | 0.408557  |
| 64 | 1 | 0 | -2.566411 | -4.592437 | 1.610646  |
| 65 | 1 | 0 | -1.632918 | -5.029410 | -0.714738 |
| 66 | 1 | 0 | -0.384901 | -4.968497 | 0.530173  |
| 67 | 1 | 0 | -1.158292 | -2.680375 | -1.356328 |
| 68 | 1 | 0 | 0.321537  | -3.641892 | -1.443183 |
| 69 | 1 | 0 | 0.704099  | -1.031911 | -1.424079 |
| 70 | 1 | 0 | 3.161300  | -1.314351 | 2.258013  |
| 71 | 1 | 0 | 3.417330  | -2.483958 | 0.947693  |
| 72 | 6 | 0 | 4.182680  | -0.647069 | -1.004582 |
| 73 | 6 | 0 | 5.684975  | -0.727103 | -0.717315 |
| 74 | 6 | 0 | 6.004496  | -1.797586 | 0.326419  |
| 75 | 6 | 0 | 5.224929  | -1.545453 | 1.616938  |
| 76 | 1 | 0 | 6.029982  | 0.247846  | -0.347469 |
| 77 | 1 | 0 | 6.225922  | -0.924027 | -1.648303 |
| 78 | 1 | 0 | 5.726570  | -2.784451 | -0.070435 |
| 79 | 1 | 0 | 7.080223  | -1.824296 | 0.527310  |
| 80 | 1 | 0 | 5.440031  | -2.322871 | 2.356936  |
| 81 | 1 | 0 | 5.541217  | -0.588471 | 2.052702  |
| 82 | 1 | 0 | 3.862020  | -1.582149 | -1.481780 |
| 83 | 1 | 0 | 3.981108  | 0.157808  | -1.717638 |
| 84 | 8 | 0 | 2.694346  | -3.768314 | -1.183757 |
| 85 | 1 | 0 | 2.510940  | -4.154842 | -0.314888 |
| 86 | 1 | 0 | 3.612264  | -3.991590 | -1.389461 |
| 87 | 8 | 0 | 1.082146  | -3.086855 | 1.028216  |
| 88 | 1 | 0 | 1.336608  | -2.607354 | 1.833221  |
| 89 | 1 | 0 | -0.844592 | 1.435620  | -0.129805 |

### 4-IM1'

Zero-point correction = 0.82873 a.u.

Thermal correction to Gibbs Free Energy = 0.74811 a.u.

Sum of electronic and zero-point Energies = -2466.37636 a.u.

Sum of electronic and thermal Free Energies = -2466.45697 a.u.

Standard orientation:

| Center Number | Atomic Number | Atomic Type | Coordinates (Angstroms) |           |           |
|---------------|---------------|-------------|-------------------------|-----------|-----------|
|               |               |             | X                       | Y         | Z         |
| 1             | 6             | 0           | 1.169362                | 3.122468  | 2.896684  |
| 2             | 6             | 0           | 2.654538                | 2.797417  | 2.774075  |
| 3             | 1             | 0           | 0.880716                | 3.219284  | 3.948172  |
| 4             | 1             | 0           | 3.256699                | 3.554605  | 3.286032  |
| 5             | 1             | 0           | 2.856029                | 1.843164  | 3.272929  |
| 6             | 1             | 0           | 0.965210                | 4.088675  | 2.416598  |
| 7             | 6             | 0           | 0.309732                | 2.050014  | 2.227635  |
| 8             | 1             | 0           | -0.728965               | 2.388218  | 2.206688  |
| 9             | 1             | 0           | 0.311626                | 1.115467  | 2.806294  |
| 10            | 7             | 0           | -3.204985               | -0.541576 | -0.364196 |
| 11            | 6             | 0           | -3.857836               | -0.269997 | 0.927227  |
| 12            | 6             | 0           | -4.514443               | -1.521141 | 1.528209  |
| 13            | 6             | 0           | -5.451709               | -2.165339 | 0.506007  |
| 14            | 6             | 0           | -3.941580               | -1.380581 | -1.328864 |
| 15            | 6             | 0           | -4.589058               | -2.603958 | -0.678110 |
| 16            | 1             | 0           | -4.631870               | 0.495334  | 0.787714  |
| 17            | 1             | 0           | -3.111258               | 0.100350  | 1.627694  |
| 18            | 1             | 0           | -5.076934               | -1.185640 | 2.404714  |
| 19            | 6             | 0           | -3.506287               | -2.556290 | 2.028332  |

|    |    |   |           |           |           |    |   |   |           |           |           |
|----|----|---|-----------|-----------|-----------|----|---|---|-----------|-----------|-----------|
| 20 | 1  | 0 | -6.207127 | -1.444320 | 0.176108  | 92 | 1 | 0 | -0.402026 | 0.988909  | -2.890416 |
| 21 | 1  | 0 | -4.727433 | -0.767051 | -1.790189 | 93 | 8 | 0 | -0.880060 | -1.178340 | 1.517000  |
| 22 | 1  | 0 | -3.240620 | -1.680653 | -2.106481 | 94 | 1 | 0 | -0.338933 | -0.573325 | 0.971553  |
| 23 | 6  | 0 | -3.570738 | -3.647128 | -0.221015 | 95 | 1 | 0 | -0.275695 | -1.918118 | 1.699505  |
| 24 | 1  | 0 | -5.204396 | -3.082996 | -1.445682 |    |   |   |           |           |           |
| 25 | 7  | 0 | -2.719487 | -3.114189 | 0.885429  |    |   |   |           |           |           |
| 26 | 1  | 0 | -4.024775 | -3.392306 | 2.504141  |    |   |   |           |           |           |
| 27 | 1  | 0 | -2.785093 | -2.123349 | 2.721973  |    |   |   |           |           |           |
| 28 | 1  | 0 | -4.081881 | -4.529601 | 0.172067  |    |   |   |           |           |           |
| 29 | 1  | 0 | -5.970307 | -3.022939 | 0.947391  |    |   |   |           |           |           |
| 30 | 1  | 0 | -2.895797 | -3.940479 | -1.024699 |    |   |   |           |           |           |
| 31 | 1  | 0 | -2.074720 | -3.844006 | 1.217398  |    |   |   |           |           |           |
| 32 | 6  | 0 | -2.149915 | 0.160979  | -0.836597 |    |   |   |           |           |           |
| 33 | 8  | 0 | -1.671173 | -0.081368 | -1.957678 |    |   |   |           |           |           |
| 34 | 6  | 0 | -1.527446 | 1.321533  | -0.052428 |    |   |   |           |           |           |
| 35 | 6  | 0 | -1.935139 | 2.629461  | -0.775895 |    |   |   |           |           |           |
| 36 | 7  | 0 | -0.082188 | 1.055539  | -0.027960 |    |   |   |           |           |           |
| 37 | 1  | 0 | -1.494423 | 2.584009  | -1.781274 |    |   |   |           |           |           |
| 38 | 6  | 0 | -3.461258 | 2.738882  | -0.918321 |    |   |   |           |           |           |
| 39 | 1  | 0 | -1.891595 | 1.354119  | 0.972867  |    |   |   |           |           |           |
| 40 | 6  | 0 | 0.793947  | 1.741866  | 0.831514  |    |   |   |           |           |           |
| 41 | 6  | 0 | 2.057382  | 2.012316  | 0.443266  |    |   |   |           |           |           |
| 42 | 6  | 0 | 3.080664  | 2.700471  | 1.307531  |    |   |   |           |           |           |
| 43 | 1  | 0 | 4.042341  | 2.175121  | 1.237404  |    |   |   |           |           |           |
| 44 | 1  | 0 | 3.262557  | 3.707493  | 0.905670  |    |   |   |           |           |           |
| 45 | 1  | 0 | 2.334834  | 1.796009  | -0.589645 |    |   |   |           |           |           |
| 46 | 1  | 0 | -3.865001 | 1.868211  | -1.450648 |    |   |   |           |           |           |
| 47 | 1  | 0 | -3.912497 | 2.740619  | 0.085729  |    |   |   |           |           |           |
| 48 | 6  | 0 | -1.387953 | 3.879634  | -0.077446 |    |   |   |           |           |           |
| 49 | 6  | 0 | -1.777080 | 5.150702  | -0.836740 |    |   |   |           |           |           |
| 50 | 6  | 0 | -3.294266 | 5.261899  | -0.986262 |    |   |   |           |           |           |
| 51 | 6  | 0 | -3.864648 | 4.014914  | -1.661786 |    |   |   |           |           |           |
| 52 | 1  | 0 | -1.314146 | 5.127079  | -1.832650 |    |   |   |           |           |           |
| 53 | 1  | 0 | -1.376935 | 6.029361  | -0.319751 |    |   |   |           |           |           |
| 54 | 1  | 0 | -3.746497 | 5.372562  | 0.009035  |    |   |   |           |           |           |
| 55 | 1  | 0 | -3.558460 | 6.157680  | -1.558131 |    |   |   |           |           |           |
| 56 | 1  | 0 | -4.956024 | 4.078496  | -1.727380 |    |   |   |           |           |           |
| 57 | 1  | 0 | -3.485285 | 3.957422  | -2.690809 |    |   |   |           |           |           |
| 58 | 1  | 0 | -1.799776 | 3.932004  | 0.941522  |    |   |   |           |           |           |
| 59 | 1  | 0 | -0.298344 | 3.819630  | 0.012758  |    |   |   |           |           |           |
| 60 | 1  | 0 | 0.280759  | 1.014210  | -0.980929 |    |   |   |           |           |           |
| 61 | 1  | 0 | -2.082470 | -2.366363 | 0.555713  |    |   |   |           |           |           |
| 62 | 16 | 0 | 2.132564  | -1.755592 | -1.689472 |    |   |   |           |           |           |
| 63 | 6  | 0 | 3.746137  | -1.013666 | -1.681160 |    |   |   |           |           |           |
| 64 | 6  | 0 | 4.009942  | -0.592052 | -0.380627 |    |   |   |           |           |           |
| 65 | 6  | 0 | 2.849607  | -0.913070 | 0.491728  |    |   |   |           |           |           |
| 66 | 7  | 0 | 1.832173  | -1.502168 | -0.028292 |    |   |   |           |           |           |
| 67 | 6  | 0 | 4.623253  | -0.844020 | -2.733227 |    |   |   |           |           |           |
| 68 | 6  | 0 | 5.836069  | -0.213117 | -2.439183 |    |   |   |           |           |           |
| 69 | 6  | 0 | 6.126731  | 0.210250  | -1.142794 |    |   |   |           |           |           |
| 70 | 6  | 0 | 5.222615  | 0.027006  | -0.093440 |    |   |   |           |           |           |
| 71 | 8  | 0 | 1.196498  | -0.950247 | -2.468252 |    |   |   |           |           |           |
| 72 | 6  | 0 | 2.881849  | -0.662617 | 1.978726  |    |   |   |           |           |           |
| 73 | 8  | 0 | 3.869686  | -0.266729 | 2.550061  |    |   |   |           |           |           |
| 74 | 8  | 0 | 1.736419  | -0.987372 | 2.552140  |    |   |   |           |           |           |
| 75 | 6  | 0 | 1.695692  | -0.894153 | 3.984859  |    |   |   |           |           |           |
| 76 | 1  | 0 | 0.676696  | -1.161450 | 4.259040  |    |   |   |           |           |           |
| 77 | 1  | 0 | 2.410595  | -1.594666 | 4.421056  |    |   |   |           |           |           |
| 78 | 1  | 0 | 5.459232  | 0.347799  | 0.913074  |    |   |   |           |           |           |
| 79 | 1  | 0 | 7.077058  | 0.693278  | -0.941844 |    |   |   |           |           |           |
| 80 | 1  | 0 | 6.560556  | -0.056769 | -3.231045 |    |   |   |           |           |           |
| 81 | 1  | 0 | 4.388322  | -1.181170 | -3.737302 |    |   |   |           |           |           |
| 82 | 1  | 0 | 1.926573  | 0.121269  | 4.311631  |    |   |   |           |           |           |
| 83 | 8  | 0 | 2.180686  | -3.190516 | -1.924911 |    |   |   |           |           |           |
| 84 | 8  | 0 | -0.798469 | -2.683125 | -1.249662 |    |   |   |           |           |           |
| 85 | 1  | 0 | -0.780421 | -1.774597 | -1.603496 |    |   |   |           |           |           |
| 86 | 1  | 0 | -0.555645 | -3.242698 | -2.001163 |    |   |   |           |           |           |
| 87 | 8  | 0 | 0.038761  | -3.765242 | 1.158723  |    |   |   |           |           |           |
| 88 | 1  | 0 | 0.092920  | -3.362310 | 0.271671  |    |   |   |           |           |           |
| 89 | 1  | 0 | 0.919469  | -4.114080 | 1.344699  |    |   |   |           |           |           |
| 90 | 8  | 0 | 0.309916  | 1.625964  | -3.073165 |    |   |   |           |           |           |
| 91 | 1  | 0 | 1.066451  | 1.054433  | -3.254060 |    |   |   |           |           |           |

  

| <b>4-TS1'</b>                                                  |        |        |                         |           |           |  |  |  |  |  |  |
|----------------------------------------------------------------|--------|--------|-------------------------|-----------|-----------|--|--|--|--|--|--|
| Zero-point correction = 0.82794 a.u.                           |        |        |                         |           |           |  |  |  |  |  |  |
| Thermal correction to Gibbs Free Energy = 0.74939 a.u.         |        |        |                         |           |           |  |  |  |  |  |  |
| Sum of electronic and zero-point Energies = -2466.37086 a.u.   |        |        |                         |           |           |  |  |  |  |  |  |
| Sum of electronic and thermal Free Energies = -2466.44940 a.u. |        |        |                         |           |           |  |  |  |  |  |  |
| Standard orientation:                                          |        |        |                         |           |           |  |  |  |  |  |  |
| -----                                                          |        |        |                         |           |           |  |  |  |  |  |  |
| Center                                                         | Atomic | Atomic | Coordinates (Angstroms) |           |           |  |  |  |  |  |  |
| Number                                                         | Number | Type   | X                       | Y         | Z         |  |  |  |  |  |  |
| -----                                                          |        |        |                         |           |           |  |  |  |  |  |  |
| 1                                                              | 6      | 0      | 1.208321                | 3.094784  | 2.774104  |  |  |  |  |  |  |
| 2                                                              | 6      | 0      | 2.690195                | 2.752416  | 2.689853  |  |  |  |  |  |  |
| 3                                                              | 1      | 0      | 0.903236                | 3.240961  | 3.814629  |  |  |  |  |  |  |
| 4                                                              | 1      | 0      | 3.293293                | 3.542385  | 3.147706  |  |  |  |  |  |  |
| 5                                                              | 1      | 0      | 2.882226                | 1.838531  | 3.261593  |  |  |  |  |  |  |
| 6                                                              | 1      | 0      | 1.012132                | 4.036511  | 2.245389  |  |  |  |  |  |  |
| 7                                                              | 6      | 0      | 0.353293                | 1.989182  | 2.152427  |  |  |  |  |  |  |
| 8                                                              | 1      | 0      | -0.692438               | 2.295471  | 2.156686  |  |  |  |  |  |  |
| 9                                                              | 1      | 0      | 0.408246                | 1.066833  | 2.745870  |  |  |  |  |  |  |
| 10                                                             | 7      | 0      | -3.153906               | -0.606249 | -0.355345 |  |  |  |  |  |  |
| 11                                                             | 6      | 0      | -3.782561               | -0.361020 | 0.954541  |  |  |  |  |  |  |
| 12                                                             | 6      | 0      | -4.402815               | -1.629860 | 1.556597  |  |  |  |  |  |  |
| 13                                                             | 6      | 0      | -5.352888               | -2.279859 | 0.550020  |  |  |  |  |  |  |
| 14                                                             | 6      | 0      | -3.901674               | -1.447163 | -1.311539 |  |  |  |  |  |  |
| 15                                                             | 6      | 0      | -4.510103               | -2.689991 | -0.658283 |  |  |  |  |  |  |
| 16                                                             | 1      | 0      | -4.576292               | 0.387888  | 0.839524  |  |  |  |  |  |  |
| 17                                                             | 1      | 0      | -3.028435               | 0.017854  | 1.642169  |  |  |  |  |  |  |
| 18                                                             | 1      | 0      | -4.949562               | -1.313765 | 2.450089  |  |  |  |  |  |  |
| 19                                                             | 6      | 0      | -3.364349               | -2.652524 | 2.018848  |  |  |  |  |  |  |
| 20                                                             | 1      | 0      | -6.129510               | -1.569759 | 0.246632  |  |  |  |  |  |  |
| 21                                                             | 1      | 0      | -4.710304               | -0.842202 | -1.743949 |  |  |  |  |  |  |
| 22                                                             | 1      | 0      | -3.217550               | -1.727099 | -2.111006 |  |  |  |  |  |  |
| 23                                                             | 6      | 0      | -3.461775               | -3.718868 | -0.235931 |  |  |  |  |  |  |
| 24                                                             | 1      | 0      | -5.134155               | -3.171963 | -1.416980 |  |  |  |  |  |  |
| 25                                                             | 7      | 0      | -2.592317               | -3.176350 | 0.852319  |  |  |  |  |  |  |
| 26                                                             | 1      | 0      | -3.856213               | -3.506639 | 2.490985  |  |  |  |  |  |  |
| 27                                                             | 1      | 0      | -2.644626               | -2.217057 | 2.712344  |  |  |  |  |  |  |
| 28                                                             | 1      | 0      | -3.946610               | -4.613000 | 0.164079  |  |  |  |  |  |  |
| 29                                                             | 1      | 0      | -5.844784               | -3.151732 | 0.994020  |  |  |  |  |  |  |
| 30                                                             | 1      | 0      | -2.802024               | -3.991055 | -1.058865 |  |  |  |  |  |  |
| 31                                                             | 1      | 0      | -1.915453               | -3.888768 | 1.157153  |  |  |  |  |  |  |
| 32                                                             | 6      | 0      | -2.136598               | 0.133311  | -0.854818 |  |  |  |  |  |  |
| 33                                                             | 8      | 0      | -1.705463               | -0.055447 | -2.002606 |  |  |  |  |  |  |
| 34                                                             | 6      | 0      | -1.525192               | 1.294998  | -0.063940 |  |  |  |  |  |  |
| 35                                                             | 6      | 0      | -2.028388               | 2.605575  | -0.726077 |  |  |  |  |  |  |
| 36                                                             | 7      | 0      | -0.068241               | 1.184527  | -0.154205 |  |  |  |  |  |  |
| 37                                                             | 1      | 0      | -1.690988               | 2.573926  | -1.771177 |  |  |  |  |  |  |
| 38                                                             | 6      | 0      | -3.560999               | 2.689496  | -0.714840 |  |  |  |  |  |  |
| 39                                                             | 1      | 0      | -1.814515               | 1.268866  | 0.982228  |  |  |  |  |  |  |
| 40                                                             | 6      | 0      | 0.812339                | 1.656986  | 0.753509  |  |  |  |  |  |  |
| 41                                                             | 6      | 0      | 2.157927                | 1.752288  | 0.409150  |  |  |  |  |  |  |
| 42                                                             | 6      | 0      | 3.131647                | 2.556134  | 1.238143  |  |  |  |  |  |  |
| 43                                                             | 1      | 0      | 4.123919                | 2.091924  | 1.212769  |  |  |  |  |  |  |
| 44                                                             | 1      | 0      | 3.250366                | 3.538091  | 0.759085  |  |  |  |  |  |  |
| 45                                                             | 1      | 0      | 2.380412                | 1.680177  | -0.655024 |  |  |  |  |  |  |
| 46                                                             | 1      | 0      | -4.001775               | 1.810182  | -1.201279 |  |  |  |  |  |  |
| 47                                                             | 1      | 0      | -3.907742               | 2.689660  | 0.329029  |  |  |  |  |  |  |
| 48                                                             | 6      | 0      | -1.429974               | 3.858902  | -0.079228 |  |  |  |  |  |  |
| 49                                                             | 6      | 0      | -1.905172               | 5.122511  | -0.800416 |  |  |  |  |  |  |
| 50                                                             | 6      | 0      | -3.431140               | 5.214842  | -0.802620 |  |  |  |  |  |  |
| 51                                                             | 6      | 0      | -4.050372               | 3.959075  | -1.417047 |  |  |  |  |  |  |
| 52                                                             | 1      | 0      | -1.541300               | 5.098199  | -1.836220 |  |  |  |  |  |  |
| 53                                                             | 1      | 0      | -1.466772               | 6.007452  | -0.327558 |  |  |  |  |  |  |
| 54                                                             | 1      | 0      | -3.787226               | 5.325260  | 0.230803  |  |  |  |  |  |  |
| 55                                                             | 1      | 0      | -3.758646               | 6.104969  | -1.349927 |  |  |  |  |  |  |
| 56                                                             | 1      | 0      | -5.143405               | 4.009058  | -1.373574 |  |  |  |  |  |  |

|    |    |   |           |           |           |    |    |   |           |           |           |
|----|----|---|-----------|-----------|-----------|----|----|---|-----------|-----------|-----------|
| 57 | 1  | 0 | -3.774563 | 3.903917  | -2.478555 | 22 | 1  | 0 | -3.009929 | -2.067750 | -2.067664 |
| 58 | 1  | 0 | -1.742432 | 3.908029  | 0.974174  | 23 | 6  | 0 | -2.843345 | -4.089819 | -0.232432 |
| 59 | 1  | 0 | -0.335025 | 3.813080  | -0.096449 | 24 | 1  | 0 | -4.654225 | -3.798822 | -1.293732 |
| 60 | 1  | 0 | 0.267187  | 1.144013  | -1.120065 | 25 | 7  | 0 | -1.990018 | -3.407821 | -0.785962 |
| 61 | 1  | 0 | -1.983941 | -2.418705 | 0.497395  | 26 | 1  | 0 | -3.057642 | -3.951980 | 2.503182  |
| 62 | 16 | 0 | 2.002908  | -1.590805 | -1.651485 | 27 | 1  | 0 | -2.060111 | -2.485532 | 2.665445  |
| 63 | 6  | 0 | 3.654447  | -0.955022 | -1.686127 | 28 | 1  | 0 | -3.159629 | -5.041812 | 0.202267  |
| 64 | 6  | 0 | 3.932452  | -0.426733 | -0.429407 | 29 | 1  | 0 | -5.198976 | -3.906727 | 1.155868  |
| 65 | 6  | 0 | 2.726847  | -0.549573 | 0.449004  | 30 | 1  | 0 | -2.216233 | -4.267180 | -1.104632 |
| 66 | 7  | 0 | 1.695868  | -1.202153 | -0.062301 | 31 | 1  | 0 | -1.172039 | -3.984050 | 1.031754  |
| 67 | 6  | 0 | 4.559081  | -0.979877 | -2.731193 | 32 | 6  | 0 | -2.243610 | -0.022327 | -0.871203 |
| 68 | 6  | 0 | 5.822972  | -0.444345 | -2.479187 | 33 | 8  | 0 | -1.824536 | -0.121009 | -2.030818 |
| 69 | 6  | 0 | 6.137153  | 0.067557  | -1.219549 | 34 | 6  | 0 | -1.869146 | 1.253909  | -0.100589 |
| 70 | 6  | 0 | 5.206687  | 0.079861  | -0.178648 | 35 | 6  | 0 | -2.614339 | 2.451588  | -0.731945 |
| 71 | 8  | 0 | 1.136145  | -0.846165 | -2.571085 | 36 | 7  | 0 | -0.426493 | 1.444939  | -0.261686 |
| 72 | 6  | 0 | 2.899560  | -0.507782 | 1.936935  | 37 | 1  | 0 | -2.280912 | 2.529051  | -1.777189 |
| 73 | 8  | 0 | 3.939585  | -0.205726 | 2.477835  | 38 | 6  | 0 | -4.131187 | 2.219963  | -0.722263 |
| 74 | 8  | 0 | 1.798255  | -0.884690 | 2.578373  | 39 | 1  | 0 | -2.107535 | 1.197191  | 0.955376  |
| 75 | 6  | 0 | 1.891495  | -0.927125 | 4.008939  | 40 | 6  | 0 | 0.449741  | 1.705482  | 0.643621  |
| 76 | 1  | 0 | 0.911975  | -1.253886 | 4.355117  | 41 | 6  | 0 | 1.893557  | 1.822407  | 0.200817  |
| 77 | 1  | 0 | 2.662295  | -1.637353 | 4.314200  | 42 | 6  | 0 | 2.555479  | 3.054573  | 0.858318  |
| 78 | 1  | 0 | 5.476386  | 0.451306  | 0.801272  | 43 | 1  | 0 | 3.635796  | 3.008460  | 0.712891  |
| 79 | 1  | 0 | 7.132432  | 0.460633  | -1.039759 | 44 | 1  | 0 | 2.208022  | 3.920197  | 0.281276  |
| 80 | 1  | 0 | 6.570974  | -0.440990 | -3.265087 | 45 | 1  | 0 | 1.887148  | 1.980295  | -0.882377 |
| 81 | 1  | 0 | 4.303407  | -1.405784 | -3.696263 | 46 | 1  | 0 | -4.384524 | 1.307038  | -1.275032 |
| 82 | 1  | 0 | 2.124712  | 0.061834  | 4.409460  | 47 | 1  | 0 | -4.458230 | 2.073873  | 0.317735  |
| 83 | 8  | 0 | 1.984185  | -3.048960 | -1.793374 | 48 | 6  | 0 | -2.266974 | 3.753630  | -0.002146 |
| 84 | 8  | 0 | -0.832509 | -2.620421 | -1.273200 | 49 | 6  | 0 | -3.015517 | 4.945147  | -0.602872 |
| 85 | 1  | 0 | -0.842631 | -1.788763 | -1.779965 | 50 | 6  | 0 | -4.526393 | 4.711176  | -0.597740 |
| 86 | 1  | 0 | -0.254531 | -3.212471 | -1.775955 | 51 | 6  | 0 | -4.876168 | 3.413001  | -1.325201 |
| 87 | 8  | 0 | 0.162429  | -3.682834 | 1.233814  | 52 | 1  | 0 | -2.675636 | 5.095141  | -1.636242 |
| 88 | 1  | 0 | 0.338226  | -3.160978 | 0.432690  | 53 | 1  | 0 | -2.764968 | 5.855516  | -0.049009 |
| 89 | 1  | 0 | 0.987313  | -4.147269 | 1.424655  | 54 | 1  | 0 | -4.878858 | 4.649036  | 0.441002  |
| 90 | 8  | 0 | 0.227438  | 1.714555  | -3.089797 | 55 | 1  | 0 | -5.043687 | 5.557404  | -1.061334 |
| 91 | 1  | 0 | 0.989182  | 1.169798  | -3.327871 | 56 | 1  | 0 | -5.954837 | 3.229828  | -1.289235 |
| 92 | 1  | 0 | -0.474524 | 1.051853  | -2.969570 | 57 | 1  | 0 | -4.602676 | 3.505988  | -2.384658 |
| 93 | 8  | 0 | -0.812750 | -1.112123 | 1.515205  | 58 | 1  | 0 | -2.540552 | 3.645992  | 1.058575  |
| 94 | 1  | 0 | -0.134334 | -0.859792 | 0.862737  | 59 | 1  | 0 | -1.186998 | 3.936168  | -0.040916 |
| 95 | 1  | 0 | -0.352980 | -1.829743 | 1.980459  | 60 | 1  | 0 | -0.074108 | 1.337607  | -1.248729 |
|    |    |   |           |           |           | 61 | 1  | 0 | -1.542004 | -2.565097 | 0.381138  |
|    |    |   |           |           |           | 62 | 16 | 0 | 2.264927  | -1.382180 | -1.457235 |
|    |    |   |           |           |           | 63 | 6  | 0 | 3.862424  | -0.622875 | -1.463843 |
|    |    |   |           |           |           | 64 | 6  | 0 | 3.904300  | 0.321493  | -0.448258 |
|    |    |   |           |           |           | 65 | 6  | 0 | 2.572087  | 0.390750  | 0.321699  |
|    |    |   |           |           |           | 66 | 7  | 0 | 1.645533  | -0.542990 | -0.281143 |
|    |    |   |           |           |           | 67 | 6  | 0 | 4.931686  | -0.904530 | -2.301751 |
|    |    |   |           |           |           | 68 | 6  | 0 | 6.108635  | -0.193246 | -2.091314 |
|    |    |   |           |           |           | 69 | 6  | 0 | 6.188304  | 0.742270  | -1.056165 |
|    |    |   |           |           |           | 70 | 6  | 0 | 5.101295  | 1.001855  | -0.222608 |
|    |    |   |           |           |           | 71 | 8  | 0 | 1.598540  | -1.159077 | -2.771832 |
|    |    |   |           |           |           | 72 | 6  | 0 | 2.918174  | 0.036742  | 1.780469  |
|    |    |   |           |           |           | 73 | 8  | 0 | 3.771517  | 0.616168  | 2.414390  |
|    |    |   |           |           |           | 74 | 8  | 0 | 2.208287  | -0.979973 | 2.258392  |
|    |    |   |           |           |           | 75 | 6  | 0 | 2.510681  | -1.366379 | 3.604654  |
|    |    |   |           |           |           | 76 | 1  | 0 | 1.860983  | -2.213859 | 3.818206  |
|    |    |   |           |           |           | 77 | 1  | 0 | 3.559410  | -1.657735 | 3.688430  |
|    |    |   |           |           |           | 78 | 1  | 0 | 5.205731  | 1.691894  | 0.605343  |
|    |    |   |           |           |           | 79 | 1  | 0 | 7.120490  | 1.271948  | -0.887590 |
|    |    |   |           |           |           | 80 | 1  | 0 | 6.972366  | -0.378510 | -2.721243 |
|    |    |   |           |           |           | 81 | 1  | 0 | 4.849201  | -1.654468 | -3.082359 |
|    |    |   |           |           |           | 82 | 1  | 0 | 2.304687  | -0.543015 | 4.292399  |
|    |    |   |           |           |           | 83 | 8  | 0 | 2.347478  | -2.838086 | -1.162851 |
|    |    |   |           |           |           | 84 | 8  | 0 | -0.579761 | -2.606845 | -1.434874 |
|    |    |   |           |           |           | 85 | 1  | 0 | -0.613565 | -1.782309 | -1.944006 |
|    |    |   |           |           |           | 86 | 1  | 0 | 0.265412  | -3.013602 | -1.673875 |
|    |    |   |           |           |           | 87 | 8  | 0 | 0.788435  | -3.515237 | 1.285130  |
|    |    |   |           |           |           | 88 | 1  | 0 | 1.225684  | -3.121988 | 0.507278  |
|    |    |   |           |           |           | 89 | 1  | 0 | 1.480158  | -4.042644 | 1.705227  |
|    |    |   |           |           |           | 90 | 8  | 0 | 0.420302  | 1.321170  | -2.877567 |
|    |    |   |           |           |           | 91 | 1  | 0 | 0.927434  | 0.482068  | -2.915356 |
|    |    |   |           |           |           | 92 | 1  | 0 | -0.470419 | 1.043840  | -3.141697 |
|    |    |   |           |           |           | 93 | 8  | 0 | -0.527347 | -1.035473 | 1.310429  |

#### 4-IM2'

Zero-point correction = 0.83078 a.u.

Thermal correction to Gibbs Free Energy = 0.75394 a.u.

Sum of electronic and zero-point Energies = -2466.40034 a.u.

Sum of electronic and thermal Free Energies = -2466.47719 a.u.

Standard orientation:

| Center Number | Atomic Number | Atomic Type | Coordinates (Angstroms) |           |           |
|---------------|---------------|-------------|-------------------------|-----------|-----------|
|               |               |             | X                       | Y         | Z         |
| 1             | 6             | 0           | 0.708562                | 3.247932  | 2.565851  |
| 2             | 6             | 0           | 2.213782                | 3.302237  | 2.330094  |
| 3             | 1             | 0           | 0.474698                | 3.368076  | 3.626950  |
| 4             | 1             | 0           | 2.600029                | 4.285792  | 2.614572  |
| 5             | 1             | 0           | 2.705883                | 2.565687  | 2.969072  |
| 6             | 1             | 0           | 0.205990                | 4.060833  | 2.028036  |
| 7             | 6             | 0           | 0.136811                | 1.901475  | 2.090639  |
| 8             | 1             | 0           | -0.929658               | 1.828863  | 2.297014  |
| 9             | 1             | 0           | 0.625009                | 1.077396  | 2.628808  |
| 10            | 7             | 0           | -3.072405               | -0.936123 | -0.320362 |
| 11            | 6             | 0           | -3.619183               | -0.822202 | 1.042178  |
| 12            | 6             | 0           | -3.972786               | -2.184431 | 1.652034  |
| 13            | 6             | 0           | -4.876330               | -2.965857 | 0.698238  |
| 14            | 6             | 0           | -3.700878               | -1.905316 | -1.241759 |
| 15            | 6             | 0           | -4.062269               | -3.231873 | -0.568842 |
| 16            | 1             | 0           | -4.527985               | -0.207906 | 1.021404  |
| 17            | 1             | 0           | -2.872239               | -0.347202 | 1.676634  |
| 18            | 1             | 0           | -4.495847               | -1.974986 | 2.590249  |
| 19            | 6             | 0           | -2.747370               | -3.025298 | 2.012852  |
| 20            | 1             | 0           | -5.770219               | -2.379796 | 0.459098  |
| 21            | 1             | 0           | -4.618665               | -1.452905 | -1.641194 |

|    |   |   |           |           |          |    |   |   |          |           |           |
|----|---|---|-----------|-----------|----------|----|---|---|----------|-----------|-----------|
| 94 | 1 | 0 | 0.158488  | -0.907862 | 0.605213 | 59 | 1 | 0 | 2.645492 | -3.036982 | 0.269859  |
| 95 | 1 | 0 | -0.048330 | -1.650568 | 1.887600 | 60 | 1 | 0 | 0.554697 | -0.851084 | -1.097263 |

**4-IM3'**

Zero-point correction = 0.77972 a.u.  
 Thermal correction to Gibbs Free Energy = 0.70591 a.u.  
 Sum of electronic and zero-point Energies = -2313.61731 a.u.  
 Sum of electronic and thermal Free Energies = -2313.69112 a.u.  
 Standard orientation:

| Center Number | Atomic Number | Atomic Type | Coordinates (Angstroms) |           |           |
|---------------|---------------|-------------|-------------------------|-----------|-----------|
|               |               |             | X                       | Y         | Z         |
| 1             | 6             | 0           | 0.011942                | -3.199237 | 2.525535  |
| 2             | 6             | 0           | -1.502225               | -3.265110 | 2.363344  |
| 3             | 1             | 0           | 0.308180                | -3.389182 | 3.560181  |
| 4             | 1             | 0           | -1.873623               | -4.246199 | 2.673660  |
| 5             | 1             | 0           | -1.966237               | -2.526120 | 3.026021  |
| 6             | 1             | 0           | 0.492541                | -3.956440 | 1.895131  |
| 7             | 6             | 0           | 0.524554                | -1.809159 | 2.118411  |
| 8             | 1             | 0           | 1.604708                | -1.733886 | 2.239756  |
| 9             | 1             | 0           | 0.056757                | -1.049164 | 2.760338  |
| 10            | 7             | 0           | 1.947971                | 2.187416  | -0.137045 |
| 11            | 6             | 0           | 2.499033                | 2.498067  | 1.189023  |
| 12            | 6             | 0           | 1.708711                | 3.611925  | 1.877578  |
| 13            | 6             | 0           | 1.687616                | 4.851827  | 0.983103  |
| 14            | 6             | 0           | 1.702930                | 3.339503  | -1.022788 |
| 15            | 6             | 0           | 0.954347                | 4.462967  | -0.301508 |
| 16            | 1             | 0           | 3.540688                | 2.825788  | 1.072212  |
| 17            | 1             | 0           | 2.494404                | 1.607239  | 1.815418  |
| 18            | 1             | 0           | 2.221078                | 3.826890  | 2.820444  |
| 19            | 6             | 0           | 0.283267                | 3.205062  | 2.246619  |
| 20            | 1             | 0           | 2.711050                | 5.169080  | 0.757490  |
| 21            | 1             | 0           | 2.664404                | 3.719588  | -1.392022 |
| 22            | 1             | 0           | 1.126021                | 2.977097  | -1.874842 |
| 23            | 6             | 0           | -0.498153               | 4.112899  | 0.020133  |
| 24            | 1             | 0           | 0.917815                | 5.310811  | -0.992498 |
| 25            | 7             | 0           | -0.600445               | 3.028131  | 1.049926  |
| 26            | 1             | 0           | -0.172049               | 3.990492  | 2.855006  |
| 27            | 1             | 0           | 0.250233                | 2.264459  | 2.798291  |
| 28            | 1             | 0           | -1.004928               | 4.988943  | 0.432753  |
| 29            | 1             | 0           | 1.177723                | 5.681869  | 1.483236  |
| 30            | 1             | 0           | -1.038025               | 3.752173  | -0.859001 |
| 31            | 1             | 0           | -1.568677               | 2.989678  | 1.382909  |
| 32            | 6             | 0           | 2.040974                | 0.979381  | -0.736458 |
| 33            | 8             | 0           | 1.908929                | 0.830915  | -1.951955 |
| 34            | 6             | 0           | 2.198989                | -0.304904 | 0.099823  |
| 35            | 6             | 0           | 3.406655                | -1.117635 | -0.384584 |
| 36            | 7             | 0           | 0.914838                | -0.975029 | -0.142520 |
| 37            | 1             | 0           | 3.247537                | -1.351704 | -1.445124 |
| 38            | 6             | 0           | 4.679718                | -0.271284 | -0.260249 |
| 39            | 1             | 0           | 2.283923                | -0.120346 | 1.167732  |
| 40            | 6             | 0           | 0.119669                | -1.518735 | 0.711572  |
| 41            | 6             | 0           | -1.281014               | -1.785880 | 0.244318  |
| 42            | 6             | 0           | -1.903669               | -3.026217 | 0.906754  |
| 43            | 1             | 0           | -2.990197               | -2.988017 | 0.804754  |
| 44            | 1             | 0           | -1.557594               | -3.880561 | 0.315705  |
| 45            | 1             | 0           | -1.226265               | -1.968548 | -0.833709 |
| 46            | 1             | 0           | 4.579718                | 0.658443  | -0.834187 |
| 47            | 1             | 0           | 4.817429                | 0.009689  | 0.794625  |
| 48            | 6             | 0           | 3.555161                | -2.435198 | 0.381974  |
| 49            | 6             | 0           | 4.772801                | -3.215613 | -0.118815 |
| 50            | 6             | 0           | 6.049136                | -2.380319 | -0.004352 |
| 51            | 6             | 0           | 5.903152                | -1.051017 | -0.746449 |
| 52            | 1             | 0           | 4.610575                | -3.491493 | -1.169590 |
| 53            | 1             | 0           | 4.872690                | -4.149374 | 0.444099  |
| 54            | 1             | 0           | 6.253370                | -2.180125 | 1.056395  |
| 55            | 1             | 0           | 6.906625                | -2.938488 | -0.394412 |
| 56            | 1             | 0           | 6.804678                | -0.442060 | -0.624246 |
| 57            | 1             | 0           | 5.792366                | -1.247476 | -1.820996 |
| 58            | 1             | 0           | 3.688214                | -2.213030 | 1.451186  |

|    |    |   |           |           |           |
|----|----|---|-----------|-----------|-----------|
| 59 | 1  | 0 | 2.645492  | -3.036982 | 0.269859  |
| 60 | 1  | 0 | 0.554697  | -0.851084 | -1.097263 |
| 61 | 16 | 0 | -1.650865 | 0.746605  | -1.844982 |
| 62 | 6  | 0 | -3.287069 | 0.064186  | -1.729495 |
| 63 | 6  | 0 | -3.399673 | -0.553128 | -0.488226 |
| 64 | 6  | 0 | -2.093116 | -0.388318 | 0.319921  |
| 65 | 7  | 0 | -1.328167 | 0.686942  | -0.289732 |
| 66 | 6  | 0 | -4.286500 | 0.055759  | -2.687892 |
| 67 | 6  | 0 | -5.473992 | -0.600145 | -2.369151 |
| 68 | 6  | 0 | -5.615730 | -1.227141 | -1.130891 |
| 69 | 6  | 0 | -4.588454 | -1.216457 | -0.185505 |
| 70 | 8  | 0 | -0.865686 | -0.214369 | -2.662855 |
| 71 | 6  | 0 | -2.318386 | -0.005378 | 1.781507  |
| 72 | 8  | 0 | -1.610762 | 0.772197  | 2.386983  |
| 73 | 8  | 0 | -3.338582 | -0.644726 | 2.337802  |
| 74 | 6  | 0 | -3.568902 | -0.367844 | 3.729185  |
| 75 | 1  | 0 | -4.424767 | -0.977300 | 4.011704  |
| 76 | 1  | 0 | -2.691491 | -0.639781 | 4.319904  |
| 77 | 1  | 0 | -4.736957 | -1.695496 | 0.774003  |
| 78 | 1  | 0 | -6.545840 | -1.732406 | -0.890933 |
| 79 | 1  | 0 | -6.289995 | -0.621481 | -3.084095 |
| 80 | 1  | 0 | -4.150237 | 0.551272  | -3.644125 |
| 81 | 1  | 0 | -3.789138 | 0.692082  | 3.867184  |
| 82 | 8  | 0 | -1.624311 | 2.123876  | -2.357907 |
| 83 | 1  | 0 | -0.506192 | 2.085980  | 0.593794  |
| 84 | 1  | 0 | 0.445724  | -1.552972 | -3.310813 |
| 85 | 8  | 0 | 1.356956  | -1.762859 | -3.056095 |
| 86 | 1  | 0 | 1.716498  | -0.877982 | -2.866989 |
| 87 | 1  | 0 | 1.060991  | -3.093276 | -1.742813 |
| 88 | 8  | 0 | 0.698288  | -3.690756 | -1.061590 |
| 89 | 1  | 0 | 0.671272  | -4.559860 | -1.480490 |

**4-TS2'**

Zero-point correction = 0.77719 a.u.  
 Thermal correction to Gibbs Free Energy = 0.70743 a.u.  
 Sum of electronic and zero-point Energies = -2313.57623 a.u.  
 Sum of electronic and thermal Free Energies = -2313.64600 a.u.  
 Standard orientation:

| Center Number | Atomic Number | Atomic Type | Coordinates (Angstroms) |           |           |
|---------------|---------------|-------------|-------------------------|-----------|-----------|
|               |               |             | X                       | Y         | Z         |
| 1             | 6             | 0           | -0.082193               | -3.310708 | 2.466065  |
| 2             | 6             | 0           | -1.597158               | -3.160440 | 2.359516  |
| 3             | 1             | 0           | 0.225132                | -3.281322 | 3.515033  |
| 4             | 1             | 0           | -2.097826               | -4.012556 | 2.829081  |
| 5             | 1             | 0           | -1.899825               | -2.277932 | 2.930148  |
| 6             | 1             | 0           | 0.233521                | -4.286767 | 2.079060  |
| 7             | 6             | 0           | 0.639940                | -2.197352 | 1.704583  |
| 8             | 1             | 0           | 1.720273                | -2.355436 | 1.745094  |
| 9             | 1             | 0           | 0.423035                | -1.227491 | 2.163207  |
| 10            | 7             | 0           | 1.748906                | 2.131073  | -0.155202 |
| 11            | 6             | 0           | 2.285337                | 2.349345  | 1.191305  |
| 12            | 6             | 0           | 1.551099                | 3.481627  | 1.916307  |
| 13            | 6             | 0           | 1.587737                | 4.752075  | 1.066868  |
| 14            | 6             | 0           | 1.581481                | 3.327869  | -0.991049 |
| 15            | 6             | 0           | 0.851989                | 4.439322  | -0.236961 |
| 16            | 1             | 0           | 3.349746                | 2.615934  | 1.123882  |
| 17            | 1             | 0           | 2.206549                | 1.429311  | 1.771578  |
| 18            | 1             | 0           | 2.066319                | 3.641054  | 2.868765  |
| 19            | 6             | 0           | 0.105739                | 3.136043  | 2.260208  |
| 20            | 1             | 0           | 2.623907                | 5.037810  | 0.856287  |
| 21            | 1             | 0           | 2.567085                | 3.692363  | -1.314771 |
| 22            | 1             | 0           | 1.017064                | 3.026486  | -1.873887 |
| 23            | 6             | 0           | -0.609053               | 4.093769  | 0.051798  |
| 24            | 1             | 0           | 0.836165                | 5.318580  | -0.888525 |
| 25            | 7             | 0           | -0.737953               | 2.965415  | 1.033777  |
| 26            | 1             | 0           | -0.341773               | 3.953186  | 2.832797  |
| 27            | 1             | 0           | 0.028250                | 2.211801  | 2.829958  |
| 28            | 1             | 0           | -1.113484               | 4.954176  | 0.499435  |
| 29            | 1             | 0           | 1.107886                | 5.582284  | 1.596244  |

|    |    |   |           |           |           |    |    |   |           |           |           |
|----|----|---|-----------|-----------|-----------|----|----|---|-----------|-----------|-----------|
| 30 | 1  | 0 | -1.136161 | 3.777927  | -0.850771 | 1  | 6  | 0 | 0.098304  | -3.904145 | 1.868815  |
| 31 | 1  | 0 | -1.717263 | 2.920799  | 1.329683  | 2  | 6  | 0 | -1.407932 | -3.670448 | 1.908895  |
| 32 | 6  | 0 | 1.810348  | 0.945434  | -0.828624 | 3  | 1  | 0 | 0.487063  | -4.089790 | 2.873663  |
| 33 | 8  | 0 | 1.685329  | 0.887279  | -2.046893 | 4  | 1  | 0 | -1.923681 | -4.567279 | 2.265433  |
| 34 | 6  | 0 | 2.031400  | -0.384084 | -0.093473 | 5  | 1  | 0 | -1.628606 | -2.879518 | 2.633018  |
| 35 | 6  | 0 | 3.445421  | -0.876560 | -0.467464 | 6  | 1  | 0 | 0.326827  | -4.800528 | 1.278806  |
| 36 | 7  | 0 | 0.990839  | -1.296961 | -0.617164 | 7  | 6  | 0 | 0.824746  | -2.692166 | 1.277173  |
| 37 | 1  | 0 | 3.438630  | -0.979342 | -1.564539 | 8  | 1  | 0 | 1.892382  | -2.900889 | 1.214727  |
| 38 | 6  | 0 | 4.522841  | 0.154787  | -0.107876 | 9  | 1  | 0 | 0.679813  | -1.834392 | 1.936945  |
| 39 | 1  | 0 | 1.944910  | -0.280623 | 0.987771  | 10 | 7  | 0 | 1.441251  | 2.205373  | -0.084200 |
| 40 | 6  | 0 | 0.202152  | -2.143149 | 0.245564  | 11 | 6  | 0 | 1.671421  | 2.320171  | 1.360398  |
| 41 | 6  | 0 | -1.341165 | -1.980306 | 0.059652  | 12 | 6  | 0 | 0.834102  | 3.439111  | 1.995624  |
| 42 | 6  | 0 | -2.075523 | -3.048350 | 0.905662  | 13 | 6  | 0 | 1.059392  | 4.749438  | 1.241373  |
| 43 | 1  | 0 | -3.148056 | -2.850529 | 0.883353  | 14 | 6  | 0 | 1.404068  | 3.450104  | -0.866890 |
| 44 | 1  | 0 | -1.978056 | -4.030325 | 0.422752  | 15 | 6  | 0 | 0.563823  | 4.529994  | -0.188263 |
| 45 | 1  | 0 | -1.518356 | -2.192322 | -1.002992 | 16 | 1  | 0 | 2.728929  | 2.546692  | 1.549637  |
| 46 | 1  | 0 | 4.294205  | 1.123704  | -0.568963 | 17 | 1  | 0 | 1.424568  | 1.372203  | 1.840130  |
| 47 | 1  | 0 | 4.520978  | 0.307705  | 0.981498  | 18 | 1  | 0 | 1.168119  | 3.530457  | 3.033900  |
| 48 | 6  | 0 | 3.803058  | -2.234538 | 0.144503  | 19 | 6  | 0 | -0.660896 | 3.132342  | 2.048060  |
| 49 | 6  | 0 | 5.178879  | -2.707013 | -0.332122 | 20 | 1  | 0 | 2.124031  | 5.006692  | 1.235670  |
| 50 | 6  | 0 | 6.259138  | -1.680713 | 0.012775  | 21 | 1  | 0 | 2.429673  | 3.823000  | -0.999676 |
| 51 | 6  | 0 | 5.910243  | -0.306155 | -0.559290 | 22 | 1  | 0 | 0.996416  | 3.202006  | -1.847045 |
| 52 | 1  | 0 | 5.152350  | -2.852861 | -1.421043 | 23 | 6  | 0 | -0.928143 | 4.201502  | -0.189426 |
| 53 | 1  | 0 | 5.416692  | -3.678119 | 0.114339  | 24 | 1  | 0 | 0.676541  | 5.445031  | -0.778275 |
| 54 | 1  | 0 | 6.344308  | -1.605952 | 1.105556  | 25 | 7  | 0 | -1.236142 | 3.010396  | 0.671383  |
| 55 | 1  | 0 | 7.233498  | -2.012304 | -0.361165 | 26 | 1  | 0 | -1.191028 | 3.951179  | 2.541776  |
| 56 | 1  | 0 | 6.662823  | 0.432865  | -0.265147 | 27 | 1  | 0 | -0.863709 | 2.198790  | 2.571308  |
| 57 | 1  | 0 | 5.925337  | -0.357400 | -1.656269 | 28 | 1  | 0 | -1.494549 | 5.036866  | 0.231674  |
| 58 | 1  | 0 | 3.821119  | -2.138537 | 1.239969  | 29 | 1  | 0 | 0.514650  | 5.568080  | 1.723419  |
| 59 | 1  | 0 | 3.037047  | -2.981998 | -0.095243 | 30 | 1  | 0 | -1.295329 | 3.967284  | -1.187629 |
| 60 | 1  | 0 | 0.375463  | -0.765491 | -1.231331 | 31 | 1  | 0 | -2.254953 | 2.934240  | 0.751042  |
| 61 | 16 | 0 | -1.582694 | 0.699707  | -1.904143 | 32 | 6  | 0 | 1.568682  | 1.059559  | -0.802014 |
| 62 | 6  | 0 | -3.264354 | 0.169156  | -1.688848 | 33 | 8  | 0 | 1.506447  | 1.033749  | -2.027676 |
| 63 | 6  | 0 | -3.347389 | -0.503256 | -0.475458 | 34 | 6  | 0 | 1.910491  | -0.274289 | -0.119235 |
| 64 | 6  | 0 | -1.960759 | -0.518158 | 0.238823  | 35 | 6  | 0 | 3.420849  | -0.522631 | -0.362163 |
| 65 | 7  | 0 | -1.155264 | 0.539048  | -0.375792 | 36 | 7  | 0 | 1.114740  | -1.326744 | -0.857247 |
| 66 | 6  | 0 | -4.322112 | 0.315549  | -2.572072 | 37 | 1  | 0 | 3.544235  | -0.523113 | -1.455742 |
| 67 | 6  | 0 | -5.548114 | -0.230964 | -2.202631 | 38 | 6  | 0 | 4.280251  | 0.618468  | 0.200793  |
| 68 | 6  | 0 | -5.668650 | -0.903859 | -0.986371 | 39 | 1  | 0 | 1.645411  | -0.317994 | 0.934631  |
| 69 | 6  | 0 | -4.583646 | -1.048679 | -0.120510 | 40 | 6  | 0 | 0.295420  | -2.387339 | -0.125350 |
| 70 | 8  | 0 | -0.962735 | -0.287605 | -2.817370 | 41 | 6  | 0 | -1.240547 | -2.120874 | -0.173356 |
| 71 | 6  | 0 | -2.071208 | -0.130269 | 1.718377  | 42 | 6  | 0 | -1.951598 | -3.304688 | 0.524955  |
| 72 | 8  | 0 | -1.181401 | 0.416344  | 2.334231  | 43 | 1  | 0 | -3.021756 | -3.098932 | 0.576705  |
| 73 | 8  | 0 | -3.236986 | -0.443624 | 2.273702  | 44 | 1  | 0 | -1.872747 | -4.187951 | -0.122008 |
| 74 | 6  | 0 | -3.381321 | -0.102765 | 3.660828  | 45 | 1  | 0 | -1.483331 | -2.173061 | -1.241375 |
| 75 | 1  | 0 | -4.376000 | -0.441155 | 3.944675  | 46 | 1  | 0 | 3.956934  | 1.581810  | -0.208473 |
| 76 | 1  | 0 | -2.619189 | -0.606845 | 4.259743  | 47 | 1  | 0 | 4.143265  | 0.661589  | 1.290418  |
| 77 | 1  | 0 | -4.731775 | -1.551370 | 0.826471  | 48 | 6  | 0 | 3.927039  | -1.864814 | 0.179616  |
| 78 | 1  | 0 | -6.629580 | -1.317178 | -0.696257 | 49 | 6  | 0 | 5.404666  | -2.074295 | -0.161114 |
| 79 | 1  | 0 | -6.408707 | -0.130211 | -2.855956 | 50 | 6  | 0 | 6.264792  | -0.938551 | 0.390166  |
| 80 | 1  | 0 | -4.195324 | 0.847806  | -3.509897 | 51 | 6  | 0 | 5.762417  | 0.410496  | -0.120509 |
| 81 | 1  | 0 | -3.291601 | 0.977203  | 3.792255  | 52 | 1  | 0 | 5.516870  | -2.115156 | -1.253888 |
| 82 | 8  | 0 | -1.482475 | 2.101588  | -2.345016 | 53 | 1  | 0 | 5.740564  | -3.039373 | 0.231538  |
| 83 | 1  | 0 | -0.597449 | 2.034184  | 0.552603  | 54 | 1  | 0 | 6.217144  | -0.951798 | 1.487588  |
| 84 | 1  | 0 | 1.564369  | -2.204214 | -2.070816 | 55 | 1  | 0 | 7.313851  | -1.084591 | 0.113366  |
| 85 | 8  | 0 | 1.474147  | -3.143706 | -2.422741 | 56 | 1  | 0 | 6.348714  | 1.228167  | 0.311003  |
| 86 | 1  | 0 | 2.358976  | -3.520094 | -2.579273 | 57 | 1  | 0 | 5.898397  | 0.459169  | -1.209069 |
| 87 | 1  | 0 | 0.984295  | -3.512376 | -1.449449 | 58 | 1  | 0 | 3.801803  | -1.879341 | 1.271127  |
| 88 | 8  | 0 | 0.507481  | -3.531398 | -0.287946 | 59 | 1  | 0 | 3.342338  | -2.696058 | -0.230116 |
| 89 | 1  | 0 | -0.193919 | -4.176741 | -0.102230 | 60 | 1  | 0 | 0.495392  | -0.833750 | -1.523187 |
|    |    |   |           |           |           | 61 | 16 | 0 | -1.679178 | 0.608874  | -1.880729 |
|    |    |   |           |           |           | 62 | 6  | 0 | -3.326170 | 0.089027  | -1.451812 |
|    |    |   |           |           |           | 63 | 6  | 0 | -3.258715 | -0.597246 | -0.243671 |
|    |    |   |           |           |           | 64 | 6  | 0 | -1.785829 | -0.691304 | 0.242191  |
|    |    |   |           |           |           | 65 | 7  | 0 | -1.049267 | 0.379290  | -0.431447 |
|    |    |   |           |           |           | 66 | 6  | 0 | -4.498596 | 0.296117  | -2.161097 |
|    |    |   |           |           |           | 67 | 6  | 0 | -5.676799 | -0.206883 | -1.614463 |
|    |    |   |           |           |           | 68 | 6  | 0 | -5.643512 | -0.895146 | -0.401247 |
|    |    |   |           |           |           | 69 | 6  | 0 | -4.447214 | -1.102074 | 0.287842  |
|    |    |   |           |           |           | 70 | 8  | 0 | -1.163102 | -0.317033 | -2.913116 |
|    |    |   |           |           |           | 71 | 6  | 0 | -1.605077 | -0.430177 | 1.736936  |
|    |    |   |           |           |           | 72 | 8  | 0 | -0.578603 | 0.007199  | 2.214567  |

**4-IM4'**  
Zero-point correction = 0.78290 a.u.  
Thermal correction to Gibbs Free Energy = 0.71279 a.u.  
Sum of electronic and zero-point Energies = -2313.60285 a.u.  
Sum of electronic and thermal Free Energies = -2313.67296 a.u.

Standard orientation:

| Center Number | Atomic Number | Atomic Type | Coordinates (Angstroms) |           |           |
|---------------|---------------|-------------|-------------------------|-----------|-----------|
|               |               |             | X                       | Y         | Z         |
| 70            | 8             | O           | -1.163102               | -0.317033 | -2.913116 |
| 71            | 6             | C           | -1.605077               | -0.430177 | 1.736936  |
| 72            | 8             | O           | -0.578603               | 0.007199  | 2.214567  |

|    |   |   |           |           |           |    |   |   |           |           |           |
|----|---|---|-----------|-----------|-----------|----|---|---|-----------|-----------|-----------|
| 73 | 8 | 0 | -2.666650 | -0.739279 | 2.472027  | 44 | 1 | 0 | -1.697547 | -4.190754 | -0.051396 |
| 74 | 6 | 0 | -2.514099 | -0.581941 | 3.891631  | 45 | 1 | 0 | -1.375812 | -2.206509 | -1.207636 |
| 75 | 1 | 0 | -3.436684 | -0.957687 | 4.329339  | 46 | 1 | 0 | 3.907767  | 1.767493  | -0.240591 |
| 76 | 1 | 0 | -1.655939 | -1.156985 | 4.245903  | 47 | 1 | 0 | 4.118368  | 0.883178  | 1.275392  |
| 77 | 1 | 0 | -4.461335 | -1.627665 | 1.234533  | 48 | 6 | 0 | 4.032579  | -1.671631 | 0.198347  |
| 78 | 1 | 0 | -6.567268 | -1.276516 | 0.022289  | 49 | 6 | 0 | 5.520331  | -1.815332 | -0.130210 |
| 79 | 1 | 0 | -6.621001 | -0.058110 | -2.128046 | 50 | 6 | 0 | 6.322468  | -0.635522 | 0.415761  |
| 80 | 1 | 0 | -4.495194 | 0.841823  | -3.099690 | 51 | 6 | 0 | 5.764022  | 0.683479  | -0.115175 |
| 81 | 1 | 0 | -2.375370 | 0.472006  | 4.140346  | 52 | 1 | 0 | 5.641275  | -1.861585 | -1.221903 |
| 82 | 8 | 0 | -1.641194 | 2.035024  | -2.244957 | 53 | 1 | 0 | 5.897838  | -2.759852 | 0.274360  |
| 83 | 1 | 0 | -0.952613 | 2.089217  | 0.226774  | 54 | 1 | 0 | 6.264342  | -0.639285 | 1.512703  |
| 84 | 1 | 0 | 1.773562  | -1.857994 | -1.469229 | 55 | 1 | 0 | 7.379828  | -0.736190 | 0.150500  |
| 85 | 8 | 0 | 2.668089  | -2.782120 | -2.706439 | 56 | 1 | 0 | 6.307390  | 1.532021  | 0.312792  |
| 86 | 1 | 0 | 3.615781  | -2.963748 | -2.645509 | 57 | 1 | 0 | 5.909162  | 0.726090  | -1.202793 |
| 87 | 1 | 0 | 2.227036  | -3.622502 | -2.515734 | 58 | 1 | 0 | 3.898250  | -1.680425 | 1.288894  |
| 88 | 8 | 0 | 0.560277  | -3.491753 | -0.979100 | 59 | 1 | 0 | 3.493335  | -2.534889 | -0.206613 |
| 89 | 1 | 0 | -0.016553 | -4.231971 | -0.745380 | 60 | 1 | 0 | 0.585069  | -0.841664 | -1.557671 |

#### 4-TS3'

Zero-point correction = 0.77845 a.u.

Thermal correction to Gibbs Free Energy = 0.70909 a.u.

Sum of electronic and zero-point Energies = -2313.60258 a.u.

Sum of electronic and thermal Free Energies = -2313.67194 a.u.

Standard orientation:

| Center Number | Atomic Number | Atomic Type | Coordinates (Angstroms) |           |           |
|---------------|---------------|-------------|-------------------------|-----------|-----------|
|               |               |             | X                       | Y         | Z         |
| 1             | 6             | 0           | 0.256429                | -3.836929 | 1.924770  |
| 2             | 6             | 0           | -1.252421               | -3.620358 | 1.970693  |
| 3             | 1             | 0           | 0.656128                | -3.988229 | 2.930881  |
| 4             | 1             | 0           | -1.751680               | -4.515108 | 2.354616  |
| 5             | 1             | 0           | -1.479300               | -2.816536 | 2.678736  |
| 6             | 1             | 0           | 0.486915                | -4.755203 | 1.368482  |
| 7             | 6             | 0           | 0.970156                | -2.636407 | 1.293366  |
| 8             | 1             | 0           | 2.035749                | -2.847324 | 1.204968  |
| 9             | 1             | 0           | 0.844608                | -1.770893 | 1.944846  |
| 10            | 7             | 0           | 1.316996                | 2.266479  | -0.143809 |
| 11            | 6             | 0           | 1.619003                | 2.452366  | 1.278723  |
| 12            | 6             | 0           | 0.683614                | 3.461173  | 1.954732  |
| 13            | 6             | 0           | 0.664332                | 4.764844  | 1.157739  |
| 14            | 6             | 0           | 1.019084                | 3.464667  | -0.942823 |
| 15            | 6             | 0           | 0.082281                | 4.428183  | -0.214730 |
| 16            | 1             | 0           | 2.646708                | 2.824706  | 1.385074  |
| 17            | 1             | 0           | 1.549073                | 1.492315  | 1.791983  |
| 18            | 1             | 0           | 1.085090                | 3.631686  | 2.958958  |
| 19            | 6             | 0           | -0.745659               | 2.953846  | 2.129640  |
| 20            | 1             | 0           | 1.677615                | 5.168708  | 1.053841  |
| 21            | 1             | 0           | 1.958280                | 3.985837  | -1.176046 |
| 22            | 1             | 0           | 0.573110                | 3.123714  | -1.877423 |
| 23            | 6             | 0           | -1.342995               | 3.893809  | -0.059041 |
| 24            | 1             | 0           | 0.013370                | 5.329382  | -0.832721 |
| 25            | 7             | 0           | -1.401600               | 2.686346  | 0.819126  |
| 26            | 1             | 0           | -1.328730               | 3.723730  | 2.649856  |
| 27            | 1             | 0           | -0.767717               | 2.039924  | 2.720513  |
| 28            | 1             | 0           | -1.962549               | 4.673564  | 0.400613  |
| 29            | 1             | 0           | 0.050737                | 5.514937  | 1.668550  |
| 30            | 1             | 0           | -1.768221               | 3.619908  | -1.023921 |
| 31            | 1             | 0           | -2.393300               | 2.521101  | 1.013342  |
| 32            | 6             | 0           | 1.538138                | 1.128611  | -0.840395 |
| 33            | 8             | 0           | 1.462325                | 1.071844  | -2.066493 |
| 34            | 6             | 0           | 1.950965                | -0.174012 | -0.133218 |
| 35            | 6             | 0           | 3.469740                | -0.360812 | -0.364746 |
| 36            | 7             | 0           | 1.203036                | -1.278227 | -0.850716 |
| 37            | 1             | 0           | 3.600959                | -0.370651 | -1.457717 |
| 38            | 6             | 0           | 4.270735                | 0.826948  | 0.188203  |
| 39            | 1             | 0           | 1.678115                | -0.212042 | 0.919239  |
| 40            | 6             | 0           | 0.411520                | -2.345643 | -0.101343 |
| 41            | 6             | 0           | -1.133474               | -2.114538 | -0.144325 |
| 42            | 6             | 0           | -1.810084               | -3.301757 | 0.581115  |
| 43            | 1             | 0           | -2.886312               | -3.129555 | 0.630797  |

|    |    |   |           |           |           |
|----|----|---|-----------|-----------|-----------|
| 61 | 16 | 0 | -1.647720 | 0.513227  | -1.935559 |
| 62 | 6  | 0 | -3.274124 | -0.046664 | -1.497619 |
| 63 | 6  | 0 | -3.205186 | -0.672790 | -0.256053 |
| 64 | 6  | 0 | -1.741957 | -0.707428 | 0.256016  |
| 65 | 7  | 0 | -1.043743 | 0.404919  | -0.423138 |
| 66 | 6  | 0 | -4.437602 | 0.097096  | -2.235386 |
| 67 | 6  | 0 | -5.609856 | -0.412948 | -1.682751 |
| 68 | 6  | 0 | -5.576785 | -1.044422 | -0.439484 |
| 69 | 6  | 0 | -4.387530 | -1.186689 | 0.278096  |
| 70 | 8  | 0 | -1.027996 | -0.481114 | -2.829434 |
| 71 | 6  | 0 | -1.562270 | -0.451547 | 1.749097  |
| 72 | 8  | 0 | -0.510523 | -0.071860 | 2.218746  |
| 73 | 8  | 0 | -2.640046 | -0.703384 | 2.476454  |
| 74 | 6  | 0 | -2.489693 | -0.547597 | 3.898890  |
| 75 | 1  | 0 | -3.419727 | -0.909381 | 4.332038  |
| 76 | 1  | 0 | -1.640926 | -1.134143 | 4.256003  |
| 77 | 1  | 0 | -4.403321 | -1.669018 | 1.247287  |
| 78 | 1  | 0 | -6.496681 | -1.430862 | -0.012573 |
| 79 | 1  | 0 | -6.549426 | -0.312307 | -2.215683 |
| 80 | 1  | 0 | -4.432372 | 0.602012  | -3.196409 |
| 81 | 1  | 0 | -2.338131 | 0.505228  | 4.144312  |
| 82 | 8  | 0 | -1.657538 | 1.899609  | -2.403532 |
| 83 | 1  | 0 | -1.112353 | 1.577963  | 0.207122  |
| 84 | 1  | 0 | 1.892534  | -1.808042 | -1.430344 |
| 85 | 8  | 0 | 2.819801  | -2.717904 | -2.651756 |
| 86 | 1  | 0 | 3.771473  | -2.874208 | -2.581415 |
| 87 | 1  | 0 | 2.399033  | -3.571382 | -2.473869 |
| 88 | 8  | 0 | 0.677073  | -3.450072 | -0.955137 |
| 89 | 1  | 0 | 0.303338  | -4.254631 | -0.569383 |

#### 4-IM5'

Zero-point correction = 0.78154 a.u.

Thermal correction to Gibbs Free Energy = 0.71140 a.u.

Sum of electronic and zero-point Energies = -2313.60566 a.u.

Sum of electronic and thermal Free Energies = -2313.67580 a.u.

Standard orientation:

| Center Number | Atomic Number | Atomic Type | Coordinates (Angstroms) |           |           |
|---------------|---------------|-------------|-------------------------|-----------|-----------|
|               |               |             | X                       | Y         | Z         |
| 1             | 6             | 0           | 0.237386                | -3.793569 | 2.029118  |
| 2             | 6             | 0           | -1.273823               | -3.583957 | 2.035683  |
| 3             | 1             | 0           | 0.617827                | -3.901375 | 3.048061  |
| 4             | 1             | 0           | -1.774646               | -4.465062 | 2.447578  |
| 5             | 1             | 0           | -1.522338               | -2.751403 | 2.702795  |
| 6             | 1             | 0           | 0.480770                | -4.734300 | 1.517391  |
| 7             | 6             | 0           | 0.961209                | -2.617514 | 1.362772  |
| 8             | 1             | 0           | 2.029130                | -2.829517 | 1.294394  |
| 9             | 1             | 0           | 0.829419                | -1.729025 | 1.980729  |
| 10            | 7             | 0           | 1.299164                | 2.232074  | -0.169422 |
| 11            | 6             | 0           | 1.601283                | 2.431824  | 1.254614  |
| 12            | 6             | 0           | 0.737292                | 3.513408  | 1.916043  |
| 13            | 6             | 0           | 0.782582                | 4.790926  | 1.078338  |
| 14            | 6             | 0           | 0.989673                | 3.413440  | -0.993571 |

|    |   |   |           |           |           |    |    |   |           |           |           |
|----|---|---|-----------|-----------|-----------|----|----|---|-----------|-----------|-----------|
| 15 | 6 | 0 | 0.137348  | 4.452382  | -0.265350 | 54 | 1  | 0 | 6.295673  | -0.574825 | 1.473914  |
| 16 | 1 | 0 | 2.650907  | 2.737166  | 1.357022  | 55 | 1  | 0 | 7.397280  | -0.732062 | 0.105798  |
| 17 | 1 | 0 | 1.464238  | 1.488887  | 1.785712  | 56 | 1  | 0 | 6.326835  | 1.540607  | 0.174128  |
| 18 | 1 | 0 | 1.177854  | 3.688807  | 2.903390  | 57 | 1  | 0 | 5.906731  | 0.665642  | -1.296419 |
| 19 | 6 | 0 | -0.720494 | 3.102014  | 2.128697  | 58 | 1  | 0 | 3.925169  | -1.631780 | 1.318457  |
| 20 | 1 | 0 | 1.816604  | 5.127492  | 0.936713  | 59 | 1  | 0 | 3.508804  | -2.545568 | -0.137074 |
| 21 | 1 | 0 | 1.933627  | 3.881066  | -1.307840 | 60 | 1  | 0 | 0.625096  | -0.895492 | -1.541486 |
| 22 | 1 | 0 | 0.477331  | 3.053481  | -1.886558 | 61 | 16 | 0 | -1.724118 | 0.468005  | -2.008878 |
| 23 | 6 | 0 | -1.312232 | 4.007720  | -0.043113 | 62 | 6  | 0 | -3.321887 | -0.080306 | -1.482700 |
| 24 | 1 | 0 | 0.111892  | 5.337387  | -0.909971 | 63 | 6  | 0 | -3.212413 | -0.707604 | -0.244497 |
| 25 | 7 | 0 | -1.384331 | 2.829826  | 0.842774  | 64 | 6  | 0 | -1.747643 | -0.751081 | 0.248414  |
| 26 | 1 | 0 | -1.228451 | 3.921655  | 2.662869  | 65 | 7  | 0 | -1.032888 | 0.306379  | -0.498955 |
| 27 | 1 | 0 | -0.774160 | 2.205403  | 2.749204  | 66 | 6  | 0 | -4.509169 | 0.068376  | -2.182270 |
| 28 | 1 | 0 | -1.862515 | 4.855082  | 0.397681  | 67 | 6  | 0 | -5.661536 | -0.443124 | -1.593119 |
| 29 | 1 | 0 | 0.232501  | 5.594143  | 1.580730  | 68 | 6  | 0 | -5.587854 | -1.079177 | -0.353548 |
| 30 | 1 | 0 | -1.780281 | 3.748987  | -0.995350 | 69 | 6  | 0 | -4.377411 | -1.221792 | 0.325708  |
| 31 | 1 | 0 | -2.370323 | 2.649675  | 1.032944  | 70 | 8  | 0 | -1.131797 | -0.530462 | -2.899560 |
| 32 | 6 | 0 | 1.522524  | 1.089663  | -0.849469 | 71 | 6  | 0 | -1.545284 | -0.400775 | 1.722490  |
| 33 | 8 | 0 | 1.410824  | 1.004005  | -2.074399 | 72 | 8  | 0 | -0.487031 | 0.013522  | 2.141668  |
| 34 | 6 | 0 | 1.966832  | -0.196310 | -0.128532 | 73 | 8  | 0 | -2.610070 | -0.611288 | 2.476227  |
| 35 | 6 | 0 | 3.481949  | -0.378584 | -0.380565 | 74 | 6  | 0 | -2.435733 | -0.372703 | 3.885912  |
| 36 | 7 | 0 | 1.222758  | -1.324678 | -0.815780 | 75 | 1  | 0 | -3.367877 | -0.685944 | 4.351092  |
| 37 | 1 | 0 | 3.596308  | -0.429015 | -1.474256 | 76 | 1  | 0 | -1.596155 | -0.959830 | 4.263983  |
| 38 | 6 | 0 | 4.288611  | 0.831170  | 0.112969  | 77 | 1  | 0 | -4.360784 | -1.704639 | 1.294658  |
| 39 | 1 | 0 | 1.717068  | -0.219289 | 0.929703  | 78 | 1  | 0 | -6.493137 | -1.467928 | 0.101177  |
| 40 | 6 | 0 | 0.420212  | -2.372970 | -0.047738 | 79 | 1  | 0 | -6.617437 | -0.340417 | -2.095284 |
| 41 | 6 | 0 | -1.128226 | -2.153490 | -0.118684 | 80 | 1  | 0 | -4.535379 | 0.575600  | -3.141487 |
| 42 | 6 | 0 | -1.803019 | -3.329755 | 0.622133  | 81 | 1  | 0 | -2.254508 | 0.688987  | 4.062149  |
| 43 | 1 | 0 | -2.883740 | -3.181176 | 0.634376  | 82 | 8  | 0 | -1.719669 | 1.865682  | -2.416597 |
| 44 | 1 | 0 | -1.649623 | -4.233979 | 0.021860  | 83 | 1  | 0 | 1.915894  | -1.874324 | -1.374122 |
| 45 | 1 | 0 | -1.356306 | -2.265404 | -1.184452 | 84 | 8  | 0 | 2.827807  | -2.797610 | -2.583607 |
| 46 | 1 | 0 | 3.917478  | 1.753613  | -0.347664 | 85 | 1  | 0 | 3.782797  | -2.939168 | -2.526803 |
| 47 | 1 | 0 | 4.154216  | 0.930230  | 1.199092  | 86 | 1  | 0 | 2.422591  | -3.656700 | -2.397808 |
| 48 | 6 | 0 | 4.051684  | -1.666350 | 0.227258  | 87 | 8  | 0 | 0.692785  | -3.500416 | -0.865995 |
| 49 | 6 | 0 | 5.536448  | -1.823687 | -0.107713 | 88 | 1  | 0 | 0.397320  | -4.305815 | -0.418509 |
| 50 | 6 | 0 | 6.342681  | -0.620065 | 0.377373  | 89 | 1  | 0 | -1.049477 | 1.246371  | -0.003917 |
| 51 | 6 | 0 | 5.777197  | 0.673583  | -0.205976 |    |    |   |           |           |           |
| 52 | 1 | 0 | 5.648192  | -1.917851 | -1.197285 |    |    |   |           |           |           |
| 53 | 1 | 0 | 5.918655  | -2.749300 | 0.334448  |    |    |   |           |           |           |





|                                                   |             |
|---------------------------------------------------|-------------|
| $\rho_{\text{calcd}}$ (g cm <sup>-3</sup> )       | 1.556       |
| $\mu$ (mm <sup>-1</sup> )                         | 2.853       |
| Transmission factors                              | 0.691–0.896 |
| $2\theta_{\text{max}}$ (deg)                      | 68.274      |
| No. of unique data, including $F_o^2 < 0$         | 4282        |
| No. of unique data, with $F_o^2 > 2\sigma(F_o^2)$ | 4214        |
| No. of variables                                  | 328         |
| $R(F)$ for $F_o^2 > 2\sigma(F_o^2)$ <sup>a</sup>  | 0.0464      |
| $R_w(F_o^2)$ <sup>b</sup>                         | 0.1203      |
| Goodness of fit                                   | 1.037       |

Crystals suitable for the X-ray crystal structure analysis were obtained from a solution of compound **3aa** in DCM and petroleum ether at rt. The colourless and block-shape crystals were selected and mounted for the single-crystal X-ray diffraction. The data set was collected by a Bruker D8 Venture Photon II at 170(2)K equipped with micro-focus Cu radiation source ( $K\alpha = 1.54178\text{\AA}$ ). Applied with face-indexed numerical absorption correction, the structure solution was solved and refinement was processed by SHELXTL (version 6.14) program package.<sup>9,10,11</sup> The structure was analyzed by ADDSYM routine implemented in PLATON suite and no higher symmetry was suggested.<sup>12</sup>

The crystal data and further details are listed below. CCDC 2002650 which contains the crystallographic data for the structure have been deposited with the Cambridge Crystallographic Data Centre (CCDC), 12 Union Road, Cambridge CB2 1EZ, UK, which can be obtained free of charge via Fax: +44 (0)1223 336033; E-Mail: deposit@ccdc.cam.ac.uk, <https://www.ccdc.cam.ac.uk/structures/>.

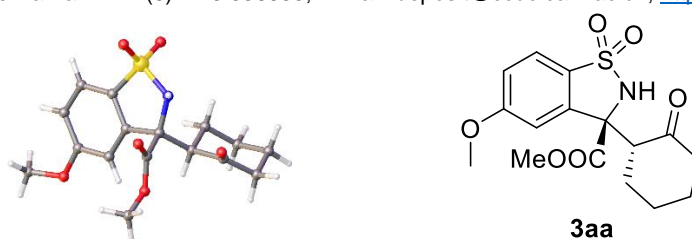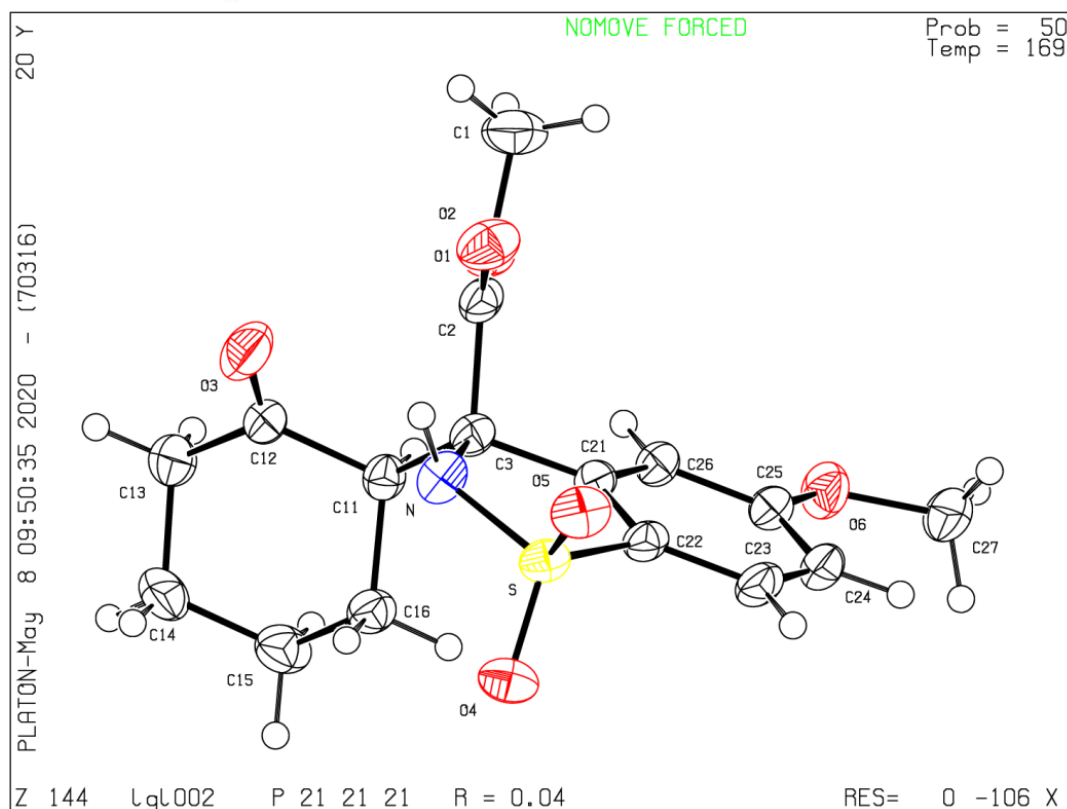

**Figure S8.** the thermal ellipsoid figure of **3aa** with 50% probabilities.

Crystallographic Data for  $C_{16}H_{19}NO_6S$ .

|                    |                     |
|--------------------|---------------------|
| Formula            | $C_{16}H_{19}NO_6S$ |
| Formula mass (amu) | 353.38              |
| Space group        | P 21 21 21          |
| $a$ (Å)            | 8.0346 (3)          |
| $b$ (Å)            | 12.6210 (5)         |
| $c$ (Å)            | 16.5455 (6)         |
| $\alpha$ (deg)     | 90                  |
| $\beta$ (deg)      | 90                  |
| $\gamma$ (deg)     | 90                  |

|                                                   |              |
|---------------------------------------------------|--------------|
| $V$ (Å <sup>3</sup> )                             | 1677.79 (11) |
| $Z$                                               | 4            |
| $\lambda$ (Å)                                     | 1.54178      |
| $T$ (K)                                           | 169 K        |
| $\rho_{\text{calcd}}$ (g cm <sup>-3</sup> )       | 1.399        |
| $\mu$ (mm <sup>-1</sup> )                         | 2.007        |
| Transmission factors                              | 0.721–0.915  |
| $2\theta_{\text{max}}$ (deg)                      | 80.536       |
| No. of unique data, including $F_o^2 < 0$         | 3542         |
| No. of unique data, with $F_o^2 > 2\sigma(F_o^2)$ | 3353         |
| No. of variables                                  | 223          |
| $R(F)$ for $F_o^2 > 2\sigma(F_o^2)$ <sup>a</sup>  | 0.0426       |
| $R_w(F_o^2)$ <sup>b</sup>                         | 0.1184       |
| Goodness of fit                                   | 1.140        |

Crystals suitable for the X-ray crystal structure analysis were obtained from a solution of compound **4aa** in DCM and petroleum ether at rt. The colourless and block-shape crystals were selected and mounted for the single-crystal X-ray diffraction. The data set was collected by a Bruker D8 Venture Photon II at 173(2)K equipped with micro-focus Cu radiation source ( $K\alpha = 1.54178\text{\AA}$ ). Applied with face-indexed numerical absorption correction, the structure solution was solved and refinement was processed by SHELXTL (version 6.14) program package.<sup>9,10,11</sup> The structure was analyzed by ADDSYM routine implemented in PLATON suite and no higher symmetry was suggested.<sup>12</sup>

The crystal data and further details are listed below. CCDC 2084361 which contains the crystallographic data for the structure have been deposited with the Cambridge Crystallographic Data Centre (CCDC), 12 Union Road, Cambridge CB2 1EZ, UK, which can be obtained free of charge via Fax: +44 (0)1223 336033; E-Mail: deposit@ccdc.cam.ac.uk, <https://www.ccdc.cam.ac.uk/structures/>.

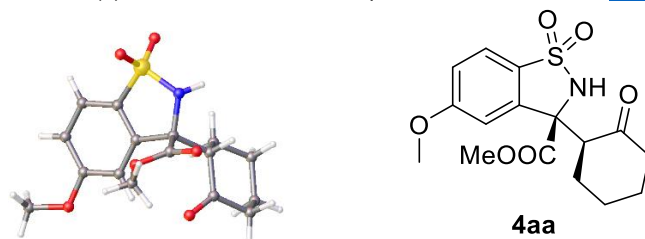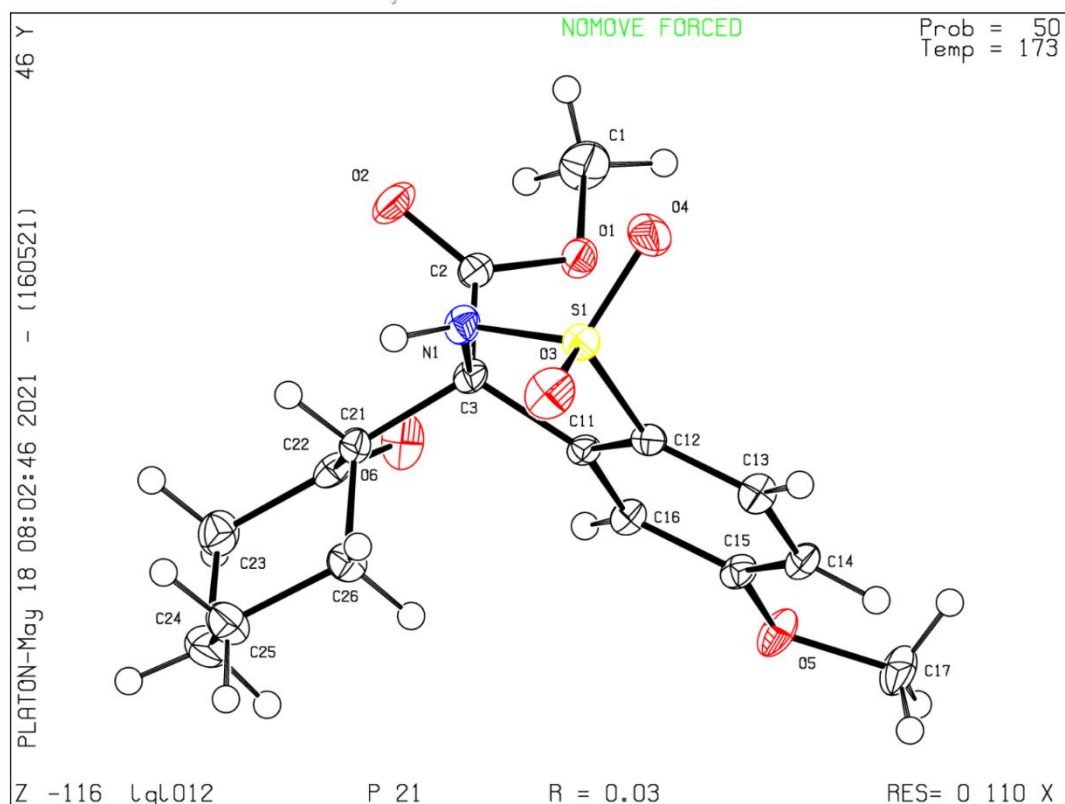

**Figure S9.** the thermal ellipsoid figure of **4aa** with 50% probabilities.

Crystallographic Data for  $C_{16}H_{19}NO_6S$ .

|                    |                     |
|--------------------|---------------------|
| Formula            | $C_{16}H_{19}NO_6S$ |
| Formula mass (amu) | 353.38              |
| Space group        | P 21                |
| $a$ (Å)            | 10.1269 (6)         |
| $b$ (Å)            | 8.0430 (5)          |

|                                                   |             |
|---------------------------------------------------|-------------|
| $c$ (Å)                                           | 10.8756 (7) |
| $\alpha$ (deg)                                    | 90          |
| $\beta$ (deg)                                     | 114.408 (2) |
| $\gamma$ (deg)                                    | 90          |
| $V$ (Å <sup>3</sup> )                             | 806.65 (9)  |
| $Z$                                               | 2           |
| $\lambda$ (Å)                                     | 1.54178     |
| $T$ (K)                                           | 173 K       |
| $\rho_{\text{calcd}}$ (g cm <sup>-3</sup> )       | 1.455       |
| $\mu$ (mm <sup>-1</sup> )                         | 2.087       |
| Transmission factors                              | 0.564–0.928 |
| $2\theta_{\text{max}}$ (deg)                      | 72.362      |
| No. of unique data, including $F_o^2 < 0$         | 3036        |
| No. of unique data, with $F_o^2 > 2\sigma(F_o^2)$ | 2976        |
| No. of variables                                  | 223         |
| $R(F)$ for $F_o^2 > 2\sigma(F_o^2)$ <sup>a</sup>  | 0.0296      |
| $R_w(F_o^2)$ <sup>b</sup>                         | 0.0764      |
| Goodness of fit                                   | 1.090       |

Crystals suitable for the X-ray crystal structure analysis were obtained from a solution of compound **3ah** in DCM and petroleum ether at rt. The colourless and block-shape crystals were selected and mounted for the single-crystal X-ray diffraction. The data set was collected by a Bruker D8 Venture Photon II at 173(2)K equipped with micro-focus Cu radiation source ( $K\alpha = 1.54178\text{\AA}$ ). Applied with face-indexed numerical absorption correction, the structure solution was solved and refinement was processed by SHELXTL (version 6.14) and OLEX 2.3 program package.<sup>9,10,11</sup> The structure was analyzed by ADDSYM routine implemented in PLATON suite and no higher symmetry was suggested.<sup>12</sup>

The crystal data and further details are listed below. CCDC 2097127 which contains the crystallographic data for the structure have been deposited with the Cambridge Crystallographic Data Centre (CCDC), 12 Union Road, Cambridge CB2 1EZ, UK, which can be obtained free of charge via Fax: +44 (0)1223 336033; E-Mail: deposit@ccdc.cam.ac.uk, <https://www.ccdc.cam.ac.uk/structures/>.

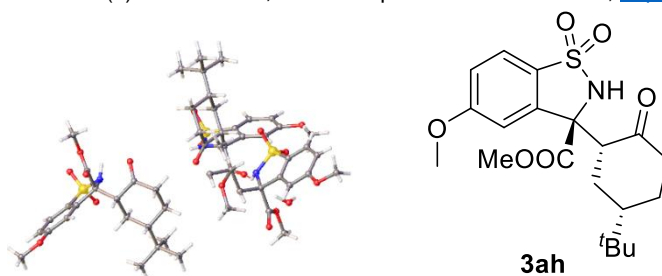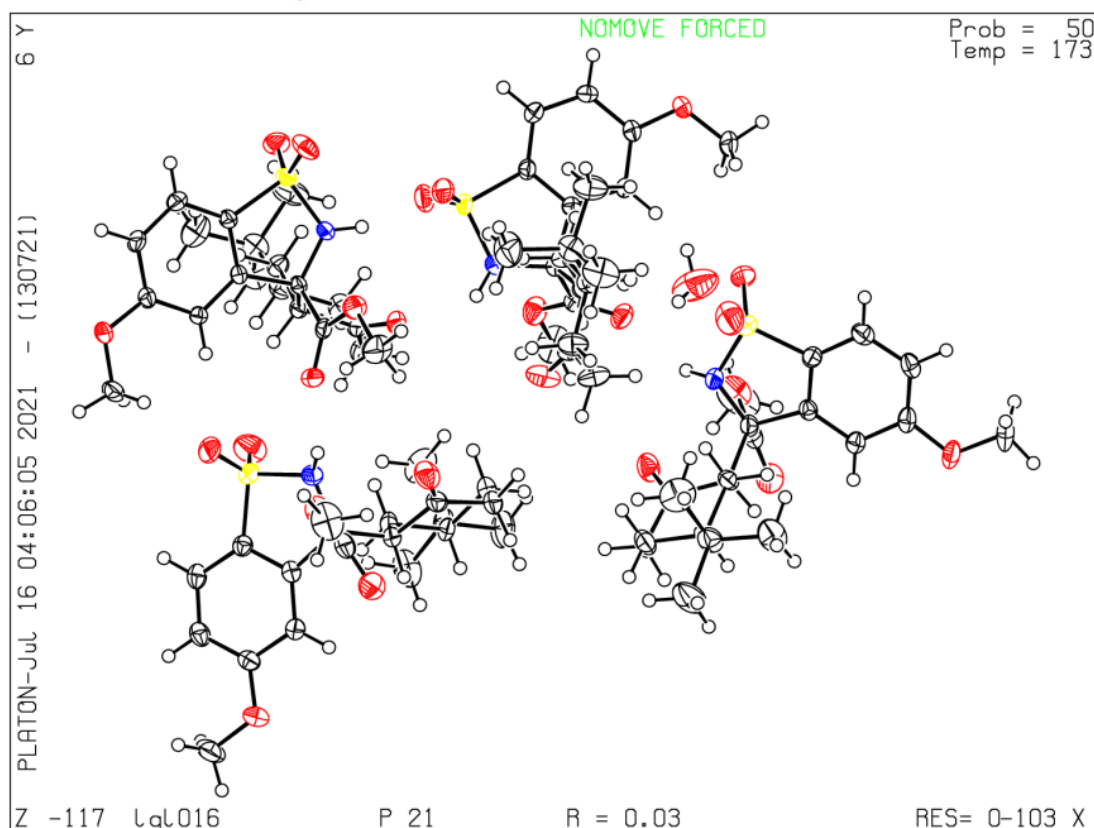

**Figure S10.** the thermal ellipsoid figure of **3ah** with 50% probabilities.

Crystallographic Data for C<sub>160</sub>H<sub>218</sub>N<sub>8</sub>O<sub>49</sub>S<sub>8</sub>.

|                                                   |                                                                                 |
|---------------------------------------------------|---------------------------------------------------------------------------------|
| Formula                                           | C <sub>160</sub> H <sub>218</sub> N <sub>8</sub> O <sub>49</sub> S <sub>8</sub> |
| Formula mass (amu)                                | 3293.89                                                                         |
| Space group                                       | P 21                                                                            |
| <i>a</i> (Å)                                      | 13.5261 (7)                                                                     |
| <i>b</i> (Å)                                      | 12.6740 (6)                                                                     |
| <i>c</i> (Å)                                      | 25.4683(12)                                                                     |
| $\alpha$ (deg)                                    | 90                                                                              |
| $\beta$ (deg)                                     | 99.780 (2)                                                                      |
| $\gamma$ (deg)                                    | 90                                                                              |
| <i>V</i> (Å <sup>3</sup> )                        | 4302.6 (4)                                                                      |
| <i>Z</i>                                          | 1                                                                               |
| $\lambda$ (Å)                                     | 1.54178                                                                         |
| <i>T</i> (K)                                      | 173 K                                                                           |
| $\rho_{\text{calcd}}$ (g cm <sup>-3</sup> )       | 1.271                                                                           |
| $\mu$ (mm <sup>-1</sup> )                         | 1.640                                                                           |
| Transmission factors                              | 0.623–0.831                                                                     |
| $2\theta_{\text{max}}$ (deg)                      | 68.518                                                                          |
| No. of unique data, including $F_o^2 < 0$         | 15375                                                                           |
| No. of unique data, with $F_o^2 > 2\sigma(F_o^2)$ | 14653                                                                           |
| No. of variables                                  | 1060                                                                            |
| $R(F)$ for $F_o^2 > 2\sigma(F_o^2)$ <sup>a</sup>  | 0.0300                                                                          |
| $R_w(F_o^2)$ <sup>b</sup>                         | 0.0710                                                                          |
| Goodness of fit                                   | 1.050                                                                           |

Crystals suitable for the X-ray crystal structure analysis were obtained from a solution of compound **7** in DCM and petroleum ether at rt. The colourless and block-shape crystals were selected and mounted for the single-crystal X-ray diffraction. The data set was collected by a Bruker D8 Venture Photon II at 173(2)K equipped with micro-focus Cu radiation source ( $K\alpha = 1.54178\text{\AA}$ ). Applied with face-indexed numerical absorption correction, the structure solution was solved and refinement was processed by SHELXTL (version 6.14) and OLEX 2.3 program package.<sup>9,10,11</sup> The structure was analyzed by ADDSYM routine implemented in PLATON suite and no higher symmetry was suggested.<sup>12</sup>

The crystal data and further details are listed below. CCDC 2090581 which contains the crystallographic data for the structure have been deposited with the Cambridge Crystallographic Data Centre (CCDC), 12 Union Road, Cambridge CB2 1EZ, UK, which can be obtained free of charge via Fax: +44 (0)1223 336033; E-Mail: deposit@ccdc.cam.ac.uk, <https://www.ccdc.cam.ac.uk/structures/>.

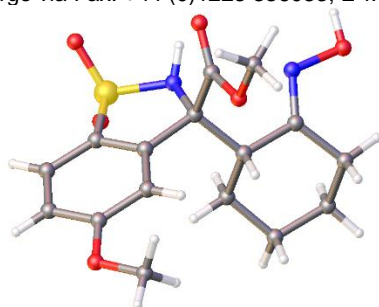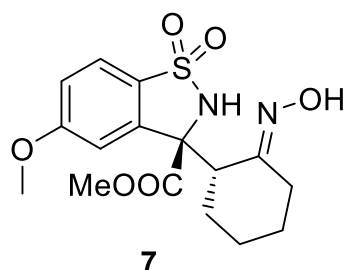

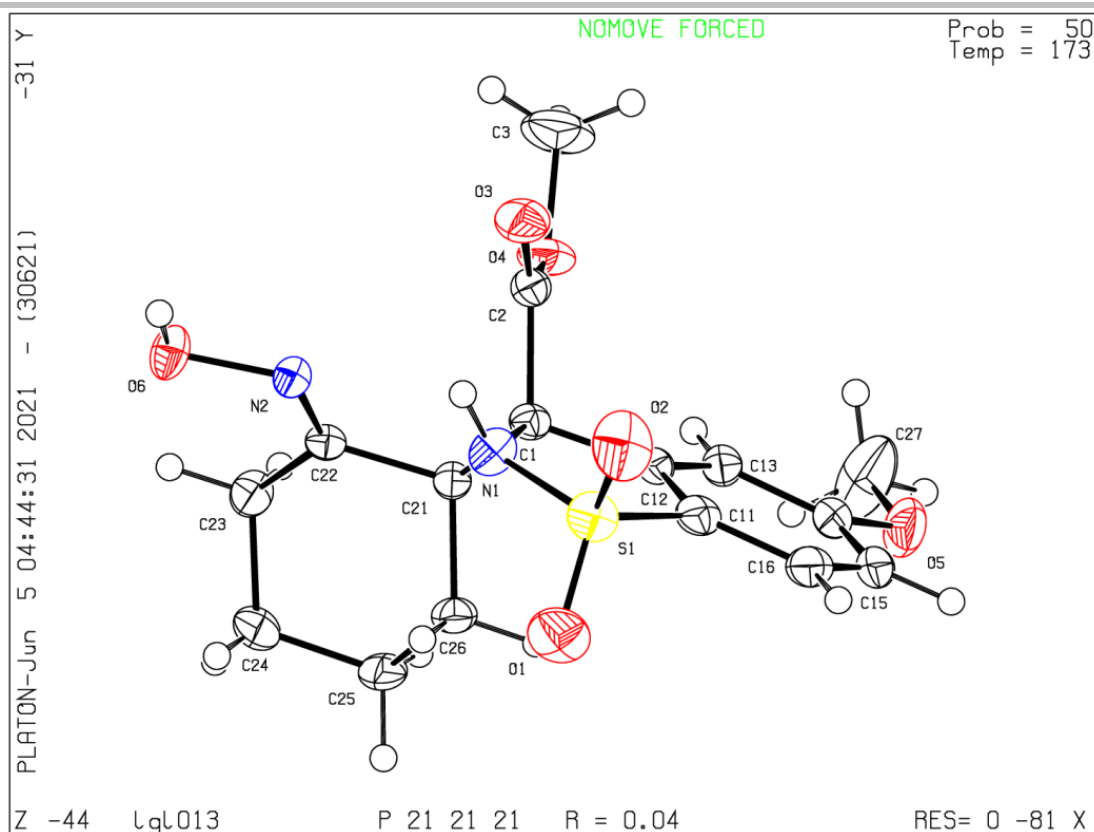

**Figure S11.** the thermal ellipsoid figure of **7** with 50% probabilities.

Crystallographic Data for  $C_{16}H_{20}N_2O_6S$ .

|                                                   |                       |
|---------------------------------------------------|-----------------------|
| Formula                                           | $C_{16}H_{20}N_2O_6S$ |
| Formula mass (amu)                                | 368.40                |
| Space group                                       | P 21 21 21            |
| $a$ (Å)                                           | 8.1051 (4)            |
| $b$ (Å)                                           | 14.1921 (6)           |
| $c$ (Å)                                           | 15.2659 (7)           |
| $\alpha$ (deg)                                    | 90                    |
| $\beta$ (deg)                                     | 90                    |
| $\gamma$ (deg)                                    | 90                    |
| $V$ (Å <sup>3</sup> )                             | 1756.01 (14)          |
| Z                                                 | 4                     |
| $\lambda$ (Å)                                     | 1.54178               |
| $T$ (K)                                           | 173 K                 |
| $\rho_{\text{calcd}}$ (g cm <sup>-3</sup> )       | 1.393                 |
| $\mu$ (mm <sup>-1</sup> )                         | 1.957                 |
| Transmission factors                              | 0.555–0.990           |
| $2\theta_{\text{max}}$ (deg)                      | 68.361                |
| No. of unique data, including $F_o^2 < 0$         | 3201                  |
| No. of unique data, with $F_o^2 > 2\sigma(F_o^2)$ | 3065                  |
| No. of variables                                  | 237                   |
| $R(F)$ for $F_o^2 > 2\sigma(F_o^2)$ <sup>a</sup>  | 0.0406                |
| $R_w(F_o^2)$ <sup>b</sup>                         | 0.1054                |
| Goodness of fit                                   | 1.109                 |

### 13. Spectral characterization data for the products.

Methyl (*R*)-5-methoxy-3-((*R*)-2-oxocyclohexyl)-2,3-dihydrobenzo[*d*]isothiazole-3-carboxylate 1,1-dioxide **3aa**

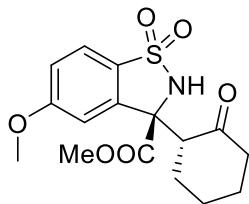

**Result:** white solid, m.p. 176 - 180 °C, 98% yield, 92% ee, >19:1 dr;  $[\alpha]_{26.1}^{20} = +155.6$  (c = 1.17, CH<sub>2</sub>Cl<sub>2</sub>); SFC (Daicel chiralcel IC-3, CO<sub>2</sub>/MeOH = 80/20, flow rate = 1.5 mL/min,  $\lambda = 230$  nm),  $t_1 = 5.52$  min,  $t_2 = 6.36$  min.

**<sup>1</sup>H NMR** (400 MHz, Chloroform-*d*)  $\delta$  7.68 (d, J = 8.8 Hz, 1H), 7.09 (dd, J = 8.8, 2.4 Hz, 1H), 6.95 (d, J = 2.4 Hz, 1H), 5.72 (s, 1H), 3.88 (s, 3H), 3.78 (s, 3H), 3.53 (dd, J = 12.8, 5.6 Hz, 1H), 2.51 – 2.42 (m, 1H), 2.42 – 2.29 (m, 1H), 2.11 – 2.01 (m, 1H), 1.89 – 1.81 (m, 1H), 1.77 – 1.56 (m, 3H), 1.49 – 1.41 (m, 1H).

**<sup>13</sup>C NMR** (100 MHz, Chloroform-*d*)  $\delta$  210.1, 170.9, 164.0, 137.3, 127.3, 123.3, 117.3, 107.9, 68.2, 58.5, 56.0, 54.0, 41.8, 26.7, 26.6, 24.3.

**HRMS** (FTMS+c ESI) m/z: [M + Na]<sup>+</sup> calcd for [C<sub>16</sub>H<sub>19</sub>NO<sub>6</sub>S+Na<sup>+</sup>]: 376.0825, found 376.0807.

**IR** (film):  $\nu$  (cm<sup>-1</sup>) 3293, 2947, 2868, 1743, 1706, 1599, 1485, 1289, 1248, 1133, 1020, 894, 735, 576.

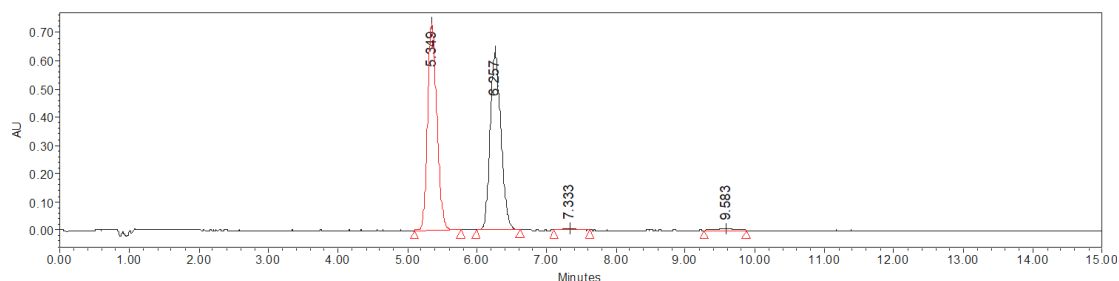

| Name | Retention Time | Area    | % Area |
|------|----------------|---------|--------|
| 1    | 5.349          | 6839316 | 49.30  |
| 2    | 6.257          | 6848656 | 49.37  |
| 3    | 7.333          | 92225   | 0.66   |
| 4    | 9.583          | 92476   | 0.67   |

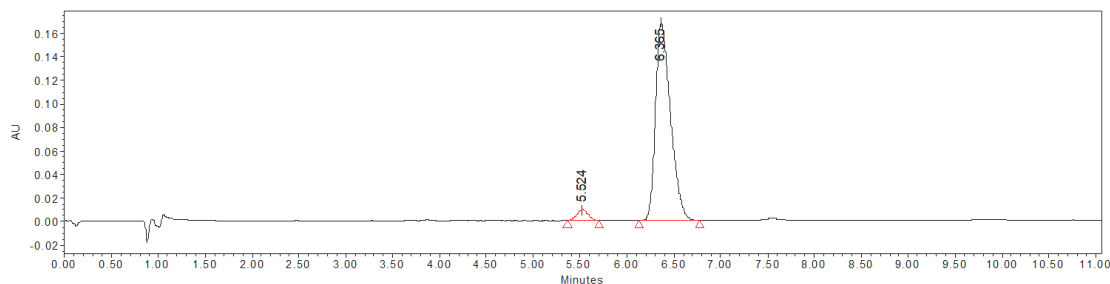

| Name | Retention Time | Area    | % Area |
|------|----------------|---------|--------|
| 1    | 5.524          | 78094   | 3.98   |
| 2    | 6.365          | 1884806 | 96.02  |

Methyl (*R*)-3-((*R*)-2-oxocyclohexyl)-2,3-dihydrobenzo[*d*]isothiazole-3-carboxylate 1,1-dioxide **3ba**

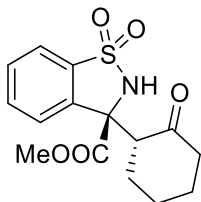

**Result:** white solid, m.p. 169 - 171 °C, 98% yield, 94% ee, >19:1 d.;  $[\alpha]_{26.9}^{20} = +173.1$  (c = 1.12, CH<sub>2</sub>Cl<sub>2</sub>); SFC (Daicel chiralcel IC-3, CO<sub>2</sub>/MeOH = 80/20, flow rate = 1.5 mL/min,  $\lambda = 210$  nm),  $t_1 = 4.14$  min,  $t_2 = 4.48$  min,  $t_3 = 5.66$  min,  $t_4 = 6.69$  min.

**<sup>1</sup>H NMR** (400 MHz, Chloroform-*d*)  $\delta$  7.78 (d, J = 7.6 Hz, 1H), 7.70 – 7.64 (m, 1H), 7.63 – 7.54 (m, 2H), 5.81 (s, 1H), 3.76 (s, 3H), 3.59 (dd, J = 12.8, 5.6 Hz, 1H), 2.51 – 2.43 (m, 1H), 2.43 – 2.32 (m, 1H), 2.11 – 2.03 (m, 1H), 1.87 – 1.79 (m, 1H), 1.75 – 1.53 (m, 3H), 1.45 – 1.35 (m, 1H).

**<sup>13</sup>C NMR** (100 MHz, Chloroform-*d*) δ 210.1, 170.9, 135.2, 134.7, 133.8, 130.8, 123.8, 121.9, 68.6, 58.3, 53.9, 41.8, 26.7, 26.6, 24.2.  
**HRMS** (FTMS+c ESI) *m/z*: [M + Na]<sup>+</sup> calcd for [C<sub>15</sub>H<sub>17</sub>NO<sub>5</sub>S+Na<sup>+</sup>]: 346.0720, found 346.0716.  
**IR** (film): ν (cm<sup>-1</sup>) 3288, 2948, 2869, 1738, 1706, 1587, 1451, 1302, 1249, 1210, 1172, 1133, 879, 760, 567.

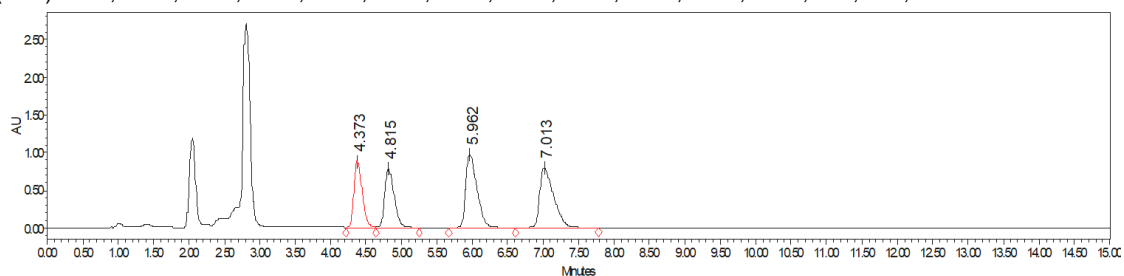

| Name | Retention Time | Area     | % Area |
|------|----------------|----------|--------|
| 1    | 4.373          | 7366220  | 19.88  |
| 2    | 4.815          | 7547147  | 20.37  |
| 3    | 5.962          | 11008677 | 29.72  |
| 4    | 7.013          | 11122363 | 30.02  |

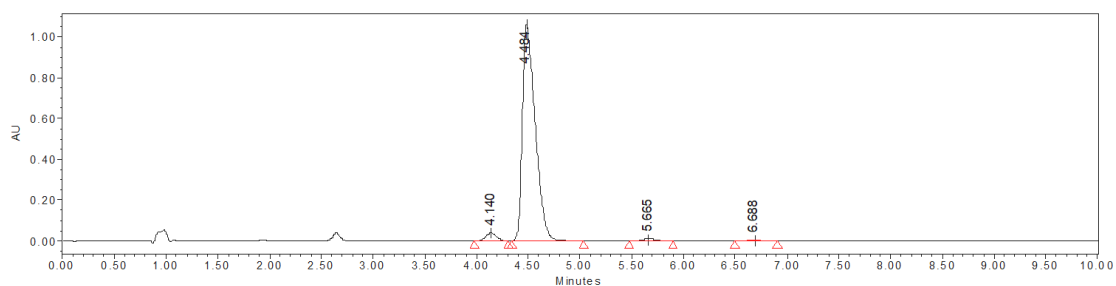

| Name | Retention Time | Area    | % Area |
|------|----------------|---------|--------|
| 1    | 4.140          | 270974  | 2.84   |
| 2    | 4.484          | 9147872 | 95.80  |
| 3    | 5.665          | 87222   | 0.91   |
| 4    | 6.688          | 42685   | 0.45   |

Ethyl (*R*)-3-((*R*)-2-oxocyclohexyl)-2,3-dihydrobenzo[*d*]isothiazole-3-carboxylate 1,1-dioxide **3ca**

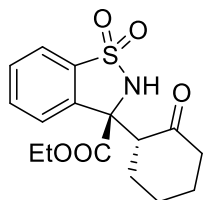

**Result:** white solid, m.p. 148 - 151 °C, 98% yield, 94% ee, >19:1 dr; [ $\alpha$ ]<sub>D</sub><sup>27</sup> = +164.6 (c = 1.14, CH<sub>2</sub>Cl<sub>2</sub>); SFC (Daicel chiralcel OX-3, CO<sub>2</sub>/EtOH = 90/10, flow rate = 1.5 mL/min, λ = 210 nm), t<sub>1</sub> = 7.99 min, t<sub>2</sub> = 9.00 min, t<sub>3</sub> = 11.94 min, t<sub>4</sub> = 17.48 min.

**<sup>1</sup>H NMR** (400 MHz, Chloroform-*d*) δ 7.79 – 7.75 (m, 1H), 7.69 – 7.64 (m, 1H), 7.62 – 7.55 (m, 2H), 5.78 (s, 1H), 4.31 – 4.21 (m, 1H), 4.21 – 4.10 (m, 1H), 3.57 (dd, *J* = 12.8, 5.6 Hz, 1H), 2.52 – 2.42 (m, 1H), 2.41 – 2.30 (m, 1H), 2.10 – 2.02 (m, 1H), 1.87 – 1.79 (m, 1H), 1.76 – 1.56 (m, 3H), 1.43 – 1.35 (m, 1H), 1.25 (t, *J* = 7.2 Hz, 3H).

**<sup>13</sup>C NMR** (100 MHz, Chloroform-*d*) δ 209.9, 170.2, 135.2, 134.9, 133.7, 130.7, 123.7, 121.8, 68.7, 63.2, 58.2, 41.8, 26.7, 26.6, 24.3, 13.8.

**HRMS** (FTMS+c ESI) *m/z*: [M + Na]<sup>+</sup> calcd for [C<sub>16</sub>H<sub>19</sub>NO<sub>5</sub>S+Na<sup>+</sup>]: 360.0876, found 360.0866.

**IR** (film): ν (cm<sup>-1</sup>) 3289, 2941, 2868, 1736, 1707, 1451, 1366, 1301, 1240, 1209, 1133, 886, 760, 567.

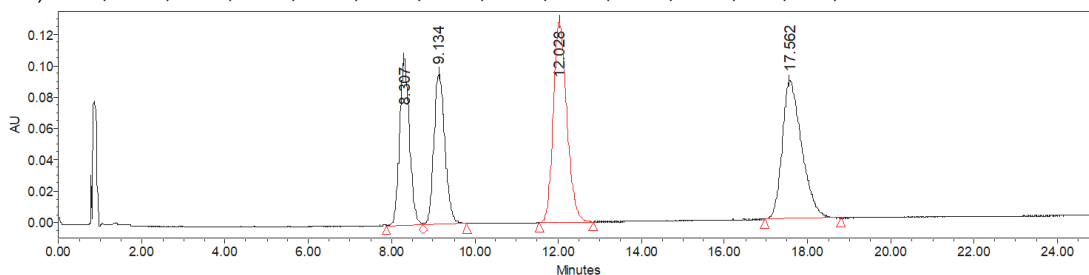

| Name | Retention Time | Area    | % Area |
|------|----------------|---------|--------|
| 1    | 8.307          | 1753188 | 18.86  |



|   |        |         |       |
|---|--------|---------|-------|
| 2 | 9.134  | 1765302 | 18.99 |
| 3 | 12.028 | 2895441 | 31.15 |
| 4 | 17.562 | 2881460 | 31.00 |

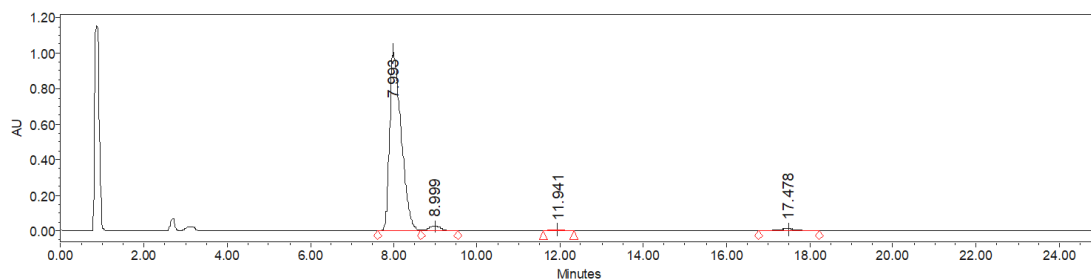

| Name | Retention Time | Area     | % Area |
|------|----------------|----------|--------|
| 1    | 7.993          | 19835348 | 94.25  |
| 2    | 8.999          | 634354   | 3.01   |
| 3    | 11.941         | 134092   | 0.64   |
| 4    | 17.478         | 441464   | 2.10   |

Isopropyl (R)-3-((R)-2-oxocyclohexyl)-2,3-dihydrobenzo[d]isothiazole-3-carboxylate 1,1-dioxide **3da**

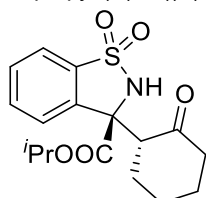

**Result:** white solid, m.p. 153 - 156 °C, 99% yield, 92% ee, >19:1 dr; [ $\alpha$ ]<sub>D</sub><sup>27.5</sup> = +154.6 (c = 1.20, CH<sub>2</sub>Cl<sub>2</sub>); SFC (Daicel chiralcel IC-3, CO<sub>2</sub>/MeOH = 90/10, flow rate = 1.5 mL/min,  $\lambda$  = 254 nm),  $t_1$  = 7.96 min,  $t_2$  = 9.24 min,  $t_3$  = 11.44 min,  $t_4$  = 12.21 min.

**<sup>1</sup>H NMR** (600 MHz, Chloroform-*d*)  $\delta$  7.78 (d,  $J$  = 7.8 Hz, 1H), 7.66 (t,  $J$  = 7.8 Hz, 1H), 7.59 (t,  $J$  = 7.8 Hz, 1H), 7.56 (d,  $J$  = 7.8 Hz, 1H), 5.75 (s, 1H), 5.03 – 4.97 (m, 1H), 3.54 (dd,  $J$  = 12.6, 5.4 Hz, 1H), 2.48 – 2.42 (m, 1H), 2.37 – 2.29 (m, 1H), 2.07 – 2.02 (m, 1H), 1.84 – 1.79 (m, 1H), 1.77 – 1.54 (m, 3H), 1.42 – 1.35 (m, 1H), 1.28 (d,  $J$  = 6.0 Hz, 3H), 1.17 (d,  $J$  = 6.0 Hz, 3H).

**<sup>13</sup>C NMR** (150 MHz, Chloroform-*d*)  $\delta$  209.7, 169.6, 135.4, 135.2, 133.7, 130.7, 123.7, 121.9, 71.3, 58.2, 41.8, 26.7, 26.7, 24.3, 21.4, 21.3.

**HRMS** (FTMS+c ESI)  $m/z$ : [M + Na]<sup>+</sup> calcd for [C<sub>17</sub>H<sub>21</sub>NO<sub>5</sub>S+Na<sup>+</sup>]: 374.1033, found 374.1014.

**IR** (film):  $\nu$  (cm<sup>-1</sup>) 3291, 2942, 2870, 1733, 1708, 1468, 1376, 1211, 1172, 1103, 882, 760, 567.

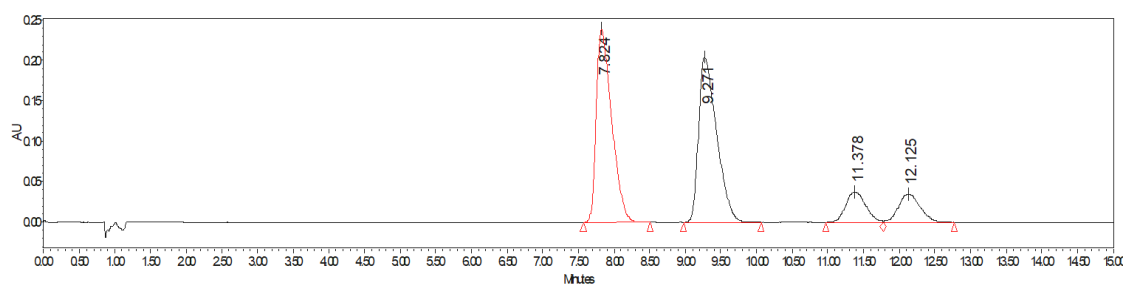

| Name | Retention Time | Area    | % Area |
|------|----------------|---------|--------|
| 1    | 7.824          | 3584503 | 41.34  |
| 2    | 9.271          | 3603920 | 41.56  |
| 3    | 11.378         | 739379  | 8.53   |
| 4    | 12.125         | 742831  | 8.57   |

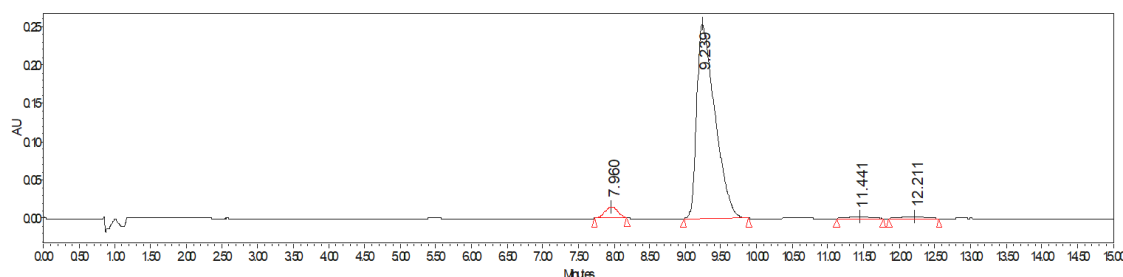

| Name | Retention Time | Area    | % Area |
|------|----------------|---------|--------|
| 1    | 7.960          | 189081  | 3.95   |
| 2    | 9.239          | 4488337 | 93.73  |
| 3    | 11.441         | 51434   | 1.07   |
| 4    | 12.211         | 59948   | 1.25   |

Benzyl (*R*)-3-((*R*)-2-oxocyclohexyl)-2,3-dihydrobenzo[*d*]isothiazole-3-carboxylate 1,1-dioxide **3ea**

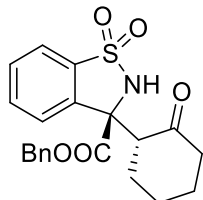

**Result:** Colorless oil, 96% yield, 99% ee, >19:1 dr;  $[\alpha]_{D}^{26.7} = +174.5$  ( $c = 1.11$ ,  $\text{CH}_2\text{Cl}_2$ ); SFC (Daicel chiralcel IC-3,  $\text{CO}_2/\text{MeOH} = 80/20$ , flow rate = 1.5 mL/min,  $\lambda = 254$  nm),  $t_1 = 6.82$  min,  $t_2 = 7.51$  min,  $t_3 = 9.08$  min,  $t_4 = 9.91$  min.

**$^1\text{H}$  NMR** (400 MHz, Chloroform-*d*)  $\delta$  7.77 – 7.71 (m, 1H), 7.60 – 7.51 (m, 2H), 7.46 – 7.41 (m, 1H), 7.30 – 7.17 (m, 5H), 5.76 (s, 1H), 5.16 (d,  $J = 12.4$  Hz, 1H), 5.08 (d,  $J = 12.4$  Hz, 1H), 3.51 (dd,  $J = 12.4, 5.2$  Hz, 1H), 2.47 – 2.38 (m, 1H), 2.35 – 2.21 (m, 1H), 2.05 – 1.96 (m, 1H), 1.82 – 1.73 (m, 1H), 1.72 – 1.48 (m, 3H), 1.40 – 1.31 (m, 1H).

**$^{13}\text{C}$  NMR** (100 MHz, Chloroform-*d*)  $\delta$  210.0, 170.2, 135.4, 134.7, 134.6, 133.7, 130.8, 128.6, 128.6, 128.1, 123.8, 122.0, 68.8, 68.8, 58.2, 41.8, 26.8, 26.8, 24.3.

**HRMS** (FTMS+c ESI)  $m/z$ :  $[\text{M} + \text{Na}]^+$  calcd for  $[\text{C}_{21}\text{H}_{21}\text{NO}_5\text{S} + \text{Na}^+]$ : 422.1033, found 422.1027.

**IR** (film):  $\nu$  ( $\text{cm}^{-1}$ ) 3291, 2943, 2869, 1739, 1706, 1452, 1363, 1303, 1209, 1047, 884, 758, 736, 700, 566.

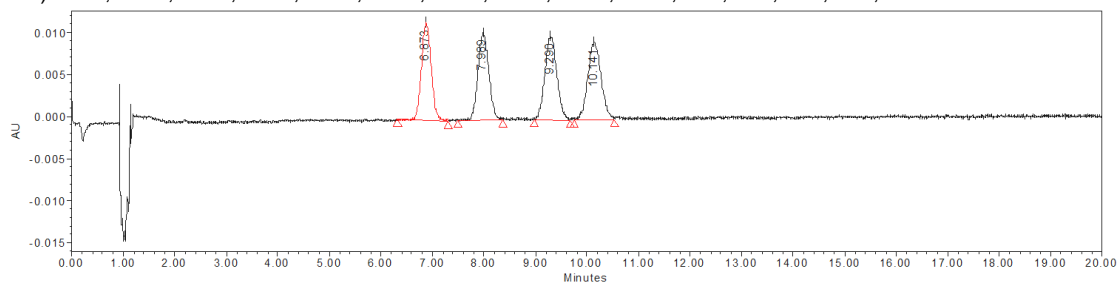

| Name | Retention Time | Area   | % Area |
|------|----------------|--------|--------|
| 1    | 6.873          | 155695 | 24.48  |
| 2    | 7.989          | 154614 | 24.31  |
| 3    | 9.290          | 162463 | 25.54  |
| 4    | 10.141         | 163218 | 25.66  |

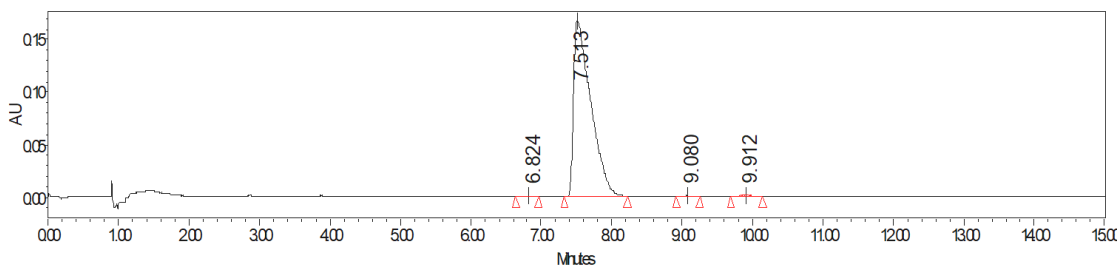

| Name | Retention Time | Area    | % Area |
|------|----------------|---------|--------|
| 1    | 6.824          | 7815    | 0.27   |
| 2    | 7.513          | 2834768 | 98.65  |
| 3    | 9.080          | 12372   | 0.43   |
| 4    | 9.912          | 18488   | 0.64   |

Methyl (*R*)-5-methyl-3-((*R*)-2-oxocyclohexyl)-2,3-dihydrobenzo[*d*]isothiazole-3-carboxylate 1,1-dioxide **3fa**

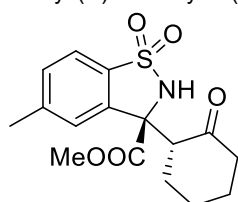

**Result:** white solid, m.p. 167 - 171 °C, 98% yield, 94% ee, >19:1 dr;  $[\alpha]_{27.1}^{25} = +156.6$  (c = 1.34, CH<sub>2</sub>Cl<sub>2</sub>); SFC (Daicel chiralcel IC-3, CO<sub>2</sub>/MeOH = 80/20, flow rate = 1.5 mL/min,  $\lambda$  = 254 nm),  $t_1$  = 5.28 min,  $t_2$  = 5.91 min.

**<sup>1</sup>H NMR** (400 MHz, Chloroform-*d*)  $\delta$  7.65 (d,  $J$  = 8.0 Hz, 1H), 7.39 (d,  $J$  = 8.0 Hz, 1H), 7.32 (s, 1H), 5.73 (s, 1H), 3.77 (s, 3H), 3.56 (dd,  $J$  = 12.4, 4.4 Hz, 1H), 2.47 (s, 4H), 2.51 – 2.43 (m, 1H), 2.41 – 2.32 (m, 1H), 2.10 – 2.02 (m, 1H), 1.88 – 1.80 (m, 1H), 1.77 – 1.56 (m, 3H), 1.45 – 1.38 (m, 1H).

**<sup>13</sup>C NMR** (100 MHz, Chloroform-*d*)  $\delta$  210.2, 171.0, 145.0, 135.0, 132.6, 131.8, 123.8, 121.6, 68.4, 58.4, 53.9, 41.8, 26.7, 26.6, 24.3, 21.8.

**HRMS** (FTMS+c ESI)  $m/z$ : [M + H]<sup>+</sup> calcd for [C<sub>16</sub>H<sub>19</sub>NO<sub>5</sub>S+H<sup>+</sup>]: 338.1056, found 338.1059.

**IR** (film):  $\nu$  (cm<sup>-1</sup>) 3280, 2947, 2868, 1739, 1706, 1599, 1451, 1364, 1301, 1247, 1188, 1144, 1046, 894, 734, 661, 570.

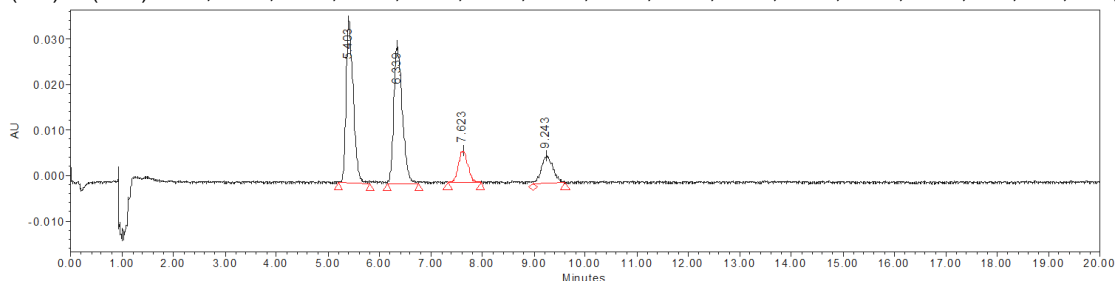

| Name | Retention Time | Area   | % Area |
|------|----------------|--------|--------|
| 1    | 5.403          | 344024 | 39.54  |
| 2    | 6.339          | 345230 | 39.68  |
| 3    | 7.623          | 89889  | 10.33  |
| 4    | 9.243          | 90899  | 10.45  |

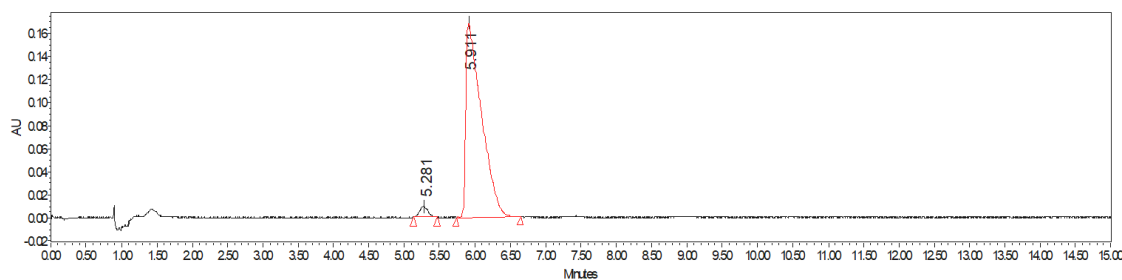

| Name | Retention Time | Area    | % Area |
|------|----------------|---------|--------|
| 1    | 5.281          | 74280   | 2.80   |
| 2    | 5.911          | 2581941 | 97.20  |

Methyl (*R*)-5-(*tert*-butyl)-3-((*R*)-2-oxocyclohexyl)-2,3-dihydrobenzo[*d*]isothiazole-3-carboxylate 1,1-dioxide **3ga**

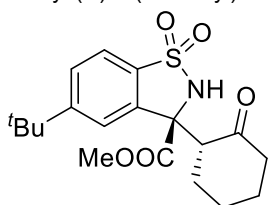

**Result:** white solid, m.p. 156 - 158 °C, 98% yield, 93% ee, >19:1 dr;  $[\alpha]_{26.5}^{25} = +141.4$  (c = 0.90, CH<sub>2</sub>Cl<sub>2</sub>); SFC (Daicel chiralcel OX-3, CO<sub>2</sub>/EtOH = 90/10, flow rate = 1.5 mL/min,  $\lambda$  = 230 nm),  $t_1$  = 11.24 min,  $t_2$  = 13.51 min,  $t_3$  = 19.20 min,  $t_4$  = 21.65 min.

**<sup>1</sup>H NMR** (400 MHz, Chloroform-*d*)  $\delta$  7.72 – 7.67 (m, 1H), 7.66 – 7.60 (m, 1H), 7.52 – 7.47 (m, 1H), 5.74 (s, 1H), 3.77 (s, 3H), 3.59 (dd,  $J$  = 12.0, 5.2 Hz, 1H), 2.52 – 2.44 (m, 1H), 2.42 – 2.33 (m, 1H), 2.10 – 2.02 (m, 1H), 1.88 – 1.81 (m, 1H), 1.78 – 1.56 (dd,  $J$  = 42.3, 11.4 Hz, 4H), 1.44 – 1.37 (m, 1H), 1.34 (s, 9H).

**<sup>13</sup>C NMR** (101 MHz, Chloroform-*d*)  $\delta$  210.2, 171.0, 158.4, 134.8, 132.5, 128.5, 121.4, 119.9, 68.6, 58.41, 53.8, 41.8, 31.1, 26.7, 26.6, 24.3.

**HRMS** (FTMS+c ESI)  $m/z$ : [M + Na]<sup>+</sup> calcd for [C<sub>19</sub>H<sub>25</sub>NO<sub>5</sub>S+Na<sup>+</sup>]: 402.1346, found 402.1335.

**IR** (film):  $\nu$  (cm<sup>-1</sup>) 3288, 2956, 2870, 1740, 1707, 1597, 1366, 1302, 1248, 1199, 1149, 1100, 836, 735, 628.

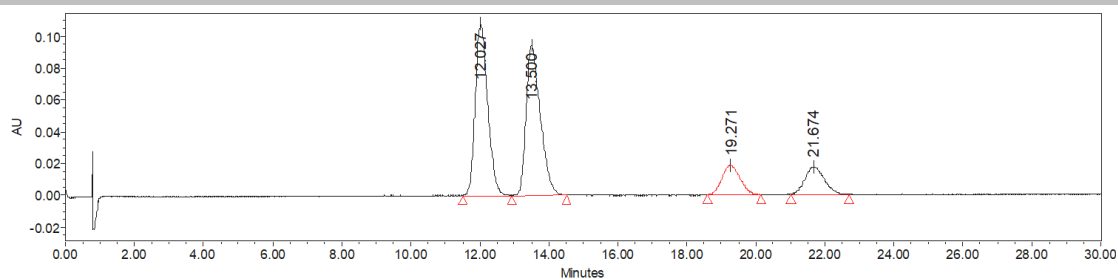

| Name | Retention Time | Area    | % Area |
|------|----------------|---------|--------|
| 1    | 12.027         | 2702111 | 39.97  |
| 2    | 13.500         | 2702176 | 39.97  |
| 3    | 19.271         | 679441  | 10.05  |
| 4    | 21.674         | 676660  | 10.01  |

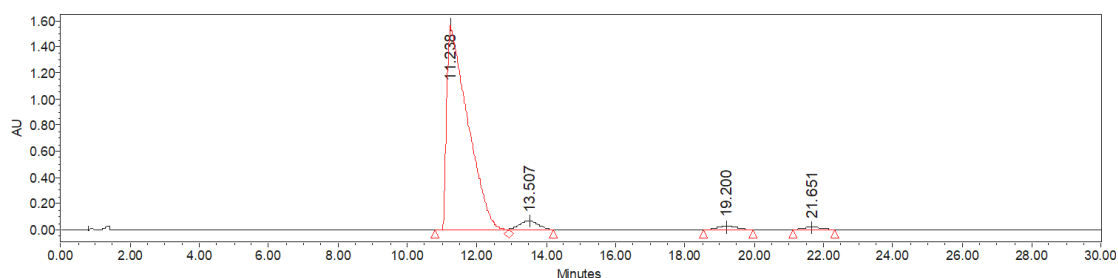

| Name | Retention Time | Area     | % Area |
|------|----------------|----------|--------|
| 1    | 11.238         | 65374313 | 94.23  |
| 2    | 13.507         | 2446955  | 3.53   |
| 3    | 19.200         | 984653   | 1.42   |
| 4    | 21.651         | 573283   | 0.83   |

Methyl (*R*)-5-fluoro-3-((*R*)-2-oxocyclohexyl)-2,3-dihydrobenzo[*d*]isothiazole-3-carboxylate 1,1-dioxide **3ha**

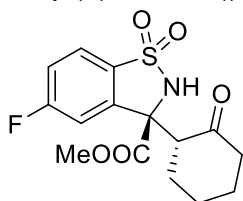

**Result:** white solid, m.p. 159 - 163 °C, 98% yield, 95% ee, >19:1 dr;  $[\alpha]_{D}^{27.3} = +151.5$  (c = 1.25, CH<sub>2</sub>Cl<sub>2</sub>); SFC (Daicel chiralcel IC-3, CO<sub>2</sub>/MeOH = 90/10, flow rate = 1.5 mL/min,  $\lambda$  = 230 nm),  $t_1$  = 5.76 min,  $t_2$  = 6.96 min,  $t_3$  = 8.67 min,  $t_4$  = 10.85 min.

**<sup>1</sup>H NMR** (400 MHz, Chloroform-*d*)  $\delta$  7.78 (dd,  $J$  = 8.8, 4.8 Hz, 1H), 7.29 (td,  $J$  = 8.4, 2.0 Hz, 1H), 7.24 (dd,  $J$  = 8.0, 2.0 Hz, 1H), 5.92 (s, 1H), 3.78 (s, 3H), 3.53 (dd,  $J$  = 12.8, 5.6 Hz, 1H), 2.51 – 2.43 (m, 1H), 2.42 – 2.32 (m, 1H), 2.13 – 2.03 (m, 1H), 1.89 – 1.81 (m, 1H), 1.79 – 1.57 (m, 3H), 1.47 – 1.39 (m, 1H).

**<sup>13</sup>C NMR** (100 MHz, Chloroform-*d*)  $\delta$  209.8, 170.4, 165.7 (d,  $J$  = 254.7 Hz), 137.9 (d,  $J$  = 9.3 Hz), 131.3 (d,  $J$  = 2.7 Hz), 124.2 (d,  $J$  = 9.8 Hz), 118.9 (d,  $J$  = 24.0 Hz), 111.0 (d,  $J$  = 24.6 Hz), 68.1 (d,  $J$  = 2.1 Hz), 58.4, 54.1 (d,  $J$  = 2.6 Hz), 41.7, 26.6, 26.5, 24.2.

**<sup>19</sup>F NMR** (376 MHz, Chloroform-*d*)  $\delta$  -102.6.

**HRMS** (FTMS+c ESI)  $m/z$ : [M + Na]<sup>+</sup> calcd for [C<sub>15</sub>H<sub>16</sub>FNO<sub>5</sub>S+Na<sup>+</sup>]: 364.0625, found 364.0608.

**IR** (film):  $\nu$  (cm<sup>-1</sup>) 3280, 2949, 2869, 1737, 1706, 1593, 1477, 1362, 1305, 1237, 1178, 1128, 873, 735, 570.

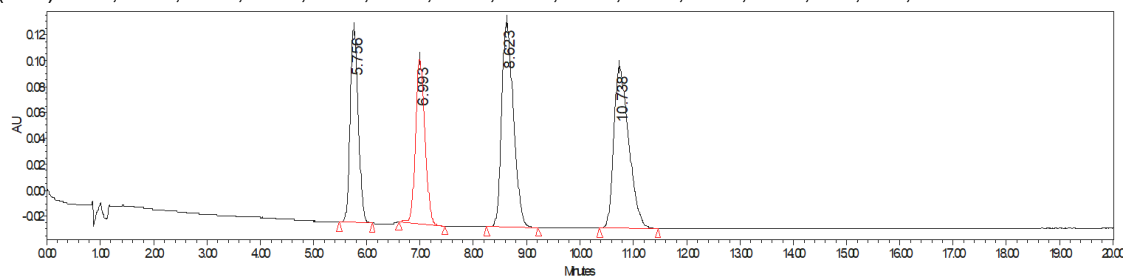

| Name | Retention Time | Area    | % Area |
|------|----------------|---------|--------|
| 1    | 5.756          | 1561533 | 19.61  |
| 2    | 6.993          | 1552411 | 19.49  |
| 3    | 8.623          | 2423769 | 30.43  |

|   |        |         |       |
|---|--------|---------|-------|
| 4 | 10.738 | 2426155 | 30.46 |
|---|--------|---------|-------|

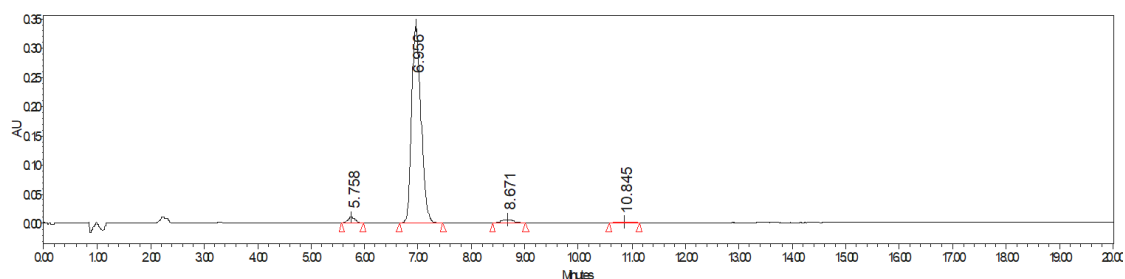

| Name | Retention Time | Area    | % Area |
|------|----------------|---------|--------|
| 1    | 5.758          | 98465   | 2.26   |
| 2    | 6.956          | 4127015 | 94.93  |
| 3    | 8.671          | 92896   | 2.14   |
| 4    | 10.845         | 29072   | 0.67   |

Methyl (*R*)-5-chloro-3-((*R*)-2-oxocyclohexyl)-2,3-dihydrobenzo[*d*]isothiazole-3-carboxylate 1,1-dioxide **3ia**

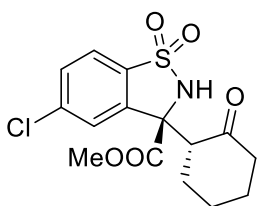

**Result:** white solid, m.p. 175 - 179 °C, 98% yield, 94% ee, >19:1 dr;  $[\alpha]_{D}^{27.3} = +136.6$  (c = 1.26, CH<sub>2</sub>Cl<sub>2</sub>); SFC (Daicel chiralcel IC-3, CO<sub>2</sub>/MeOH = 90/10, flow rate = 1.5 mL/min,  $\lambda = 230$  nm),  $t_1 = 8.17$  min,  $t_2 = 10.41$  min,  $t_3 = 12.63$  min,  $t_4 = 14.61$  min.

**<sup>1</sup>H NMR** (400 MHz, Chloroform-*d*)  $\delta$  7.75 – 7.69 (m, 1H), 7.60 – 7.52 (m, 2H), 5.87 (s, 1H), 3.79 (s, 3H), 3.55 (dd, *J* = 12.4, 4.8 Hz, 1H), 2.54 – 2.44 (m, 1H), 2.42 – 2.31 (m, 1H), 2.13 – 2.04 (m, 1H), 1.92 – 1.80 (m, 1H), 1.80 – 1.56 (m, 3H), 1.48 – 1.38 (m, 1H).

**<sup>13</sup>C NMR** (101 MHz, Chloroform-*d*)  $\delta$  209.8, 170.4, 140.3, 136.8, 133.8, 131.4, 124.0, 123.1, 68.2, 58.4, 54.2, 41.8, 26.7, 26.6, 24.2.

**HRMS** (FTMS+c ESI) *m/z*: [M + H]<sup>+</sup> calcd for [C<sub>15</sub>H<sub>16</sub>Cl<sup>34.9689</sup>NO<sub>5</sub>S+H<sup>+</sup>]: 358.0510, found 358.0509.

**HRMS** (FTMS+c ESI) *m/z*: [M + H]<sup>+</sup> calcd for [C<sub>15</sub>H<sub>16</sub>Cl<sup>36.9659</sup>NO<sub>5</sub>S+H<sup>+</sup>]: 360.0481, found 360.0474.

**IR** (film):  $\nu$  (cm<sup>-1</sup>) 3271, 2948, 2869, 1737, 1706, 1587, 1306, 1204, 1174, 1137, 1088, 883, 826, 735, 610, 570.

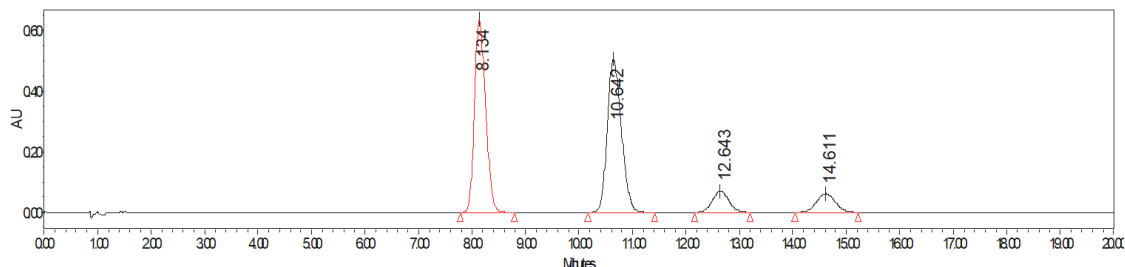

| Name | Retention Time | Area    | % Area |
|------|----------------|---------|--------|
| 1    | 8.134          | 9198199 | 42.96  |
| 2    | 10.642         | 9228550 | 43.10  |
| 3    | 12.643         | 1493652 | 6.98   |
| 4    | 14.611         | 1492171 | 6.97   |

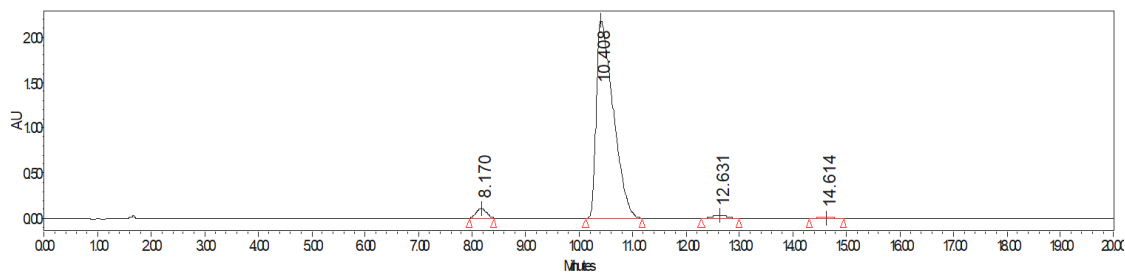

| Name | Retention Time | Area     | % Area |
|------|----------------|----------|--------|
| 1    | 8.170          | 1388502  | 2.77   |
| 2    | 10.408         | 47917207 | 95.48  |

|   |        |        |      |
|---|--------|--------|------|
| 3 | 12.631 | 630869 | 1.26 |
| 4 | 14.614 | 247943 | 0.49 |

Methyl (*R*)-3-((*R*)-2-oxocyclohexyl)-5-(trifluoromethyl)-2,3-dihydrobenzo[*d*]isothiazole-3-carboxylate 1,1-dioxide **3ja**

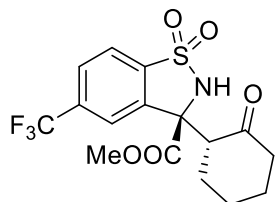

**Result:** white solid, m.p. 158 - 162 °C, 98% yield, 86% ee, >19:1 dr;  $[\alpha]_{27.1}^{25} = +125.8$  ( $c = 1.11$ ,  $\text{CH}_2\text{Cl}_2$ ); SFC (Lux 5u Cellulose-1,  $\text{CO}_2/\text{EtOH} = 95/5$ , flow rate = 0.8 mL/min,  $\lambda = 230$  nm),  $t_1 = 10.38$  min,  $t_2 = 11.34$  min,  $t_3 = 19.21$  min,  $t_4 = 27.46$  min.

**$^1\text{H}$  NMR** (400 MHz, Chloroform-*d*)  $\delta$  7.94 (d,  $J = 8.0$  Hz, 1H), 7.87 (d,  $J = 8.0$  Hz, 1H), 7.83 (s, 1H), 5.97 (s, 1H), 3.80 (s, 3H), 3.63 (dd,  $J = 12.4, 4.8$  Hz, 1H), 2.55 – 2.46 (m, 1H), 2.46 – 2.35 (m, 1H), 2.15 – 2.05 (m, 1H), 1.92 – 1.82 (m, 1H), 1.81 – 1.59 (m, 4H), 1.43 – 1.34 (m, 1H).

**$^{13}\text{C}$  NMR** (100 MHz, Chloroform-*d*)  $\delta$  209.8, 170.2, 138.5, 135.9, 135.9 (q,  $J = 33.2$  Hz), 128.2 (q,  $J = 3.4$  Hz), 122.9, 122.8 (q,  $J = 271.9$  Hz), 121.2 (q,  $J = 3.8$  Hz), 68.6, 58.4, 54.3, 41.8, 26.6, 24.2.

**$^{19}\text{F}$  NMR** (376 MHz, Chloroform-*d*)  $\delta$  -62.7.

**HRMS** (FTMS+c ESI)  $m/z$ :  $[\text{M} + \text{H}]^+$  calcd for  $[\text{C}_{16}\text{H}_{16}\text{F}_3\text{NO}_5\text{S} + \text{H}^+]$ : 392.0774, found 392.0771.

**IR** (film):  $\nu$  ( $\text{cm}^{-1}$ ) 3270, 2951, 2871, 1737, 1707, 1423, 1329, 1253, 1173, 1134, 1086, 1077, 823, 710.

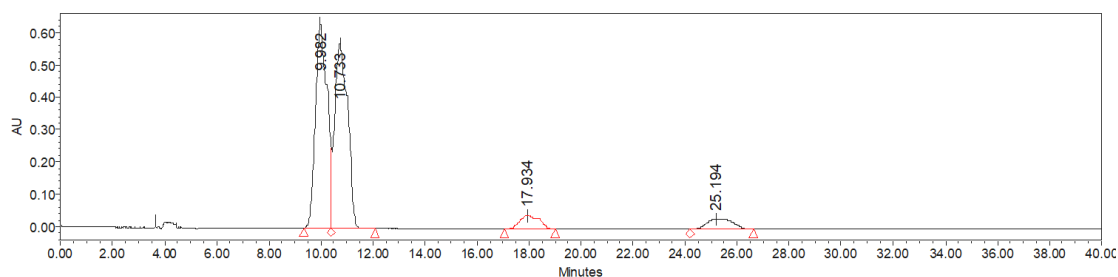

| Name | Retention Time | Area     | % Area |
|------|----------------|----------|--------|
| 1    | 9.982          | 19662423 | 44.83  |
| 2    | 10.733         | 19785727 | 45.11  |
| 3    | 17.934         | 2196231  | 5.01   |
| 4    | 25.194         | 2213040  | 5.05   |

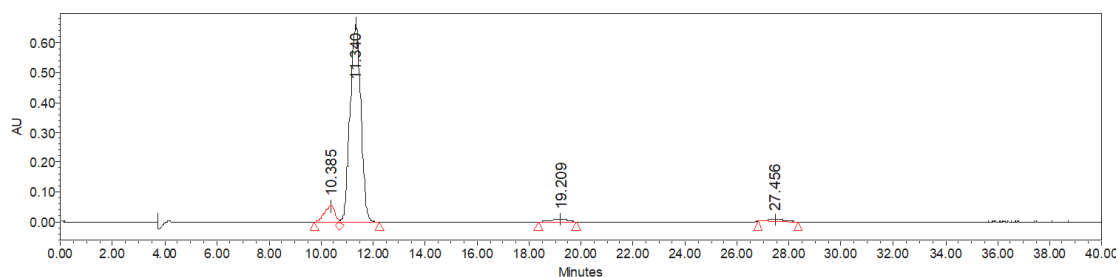

| Name | Retention Time | Area     | % Area |
|------|----------------|----------|--------|
| 1    | 10.385         | 1475428  | 6.88   |
| 2    | 11.340         | 19347315 | 90.20  |
| 3    | 19.209         | 326301   | 1.52   |
| 4    | 27.456         | 299294   | 1.40   |

Methyl (*R*)-6-methyl-3-((*R*)-2-oxocyclohexyl)-2,3-dihydrobenzo[*d*]isothiazole-3-carboxylate 1,1-dioxide **3ka**

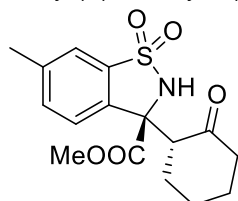

**Result:** white solid, m.p. 194 - 197 °C, 99% yield, 95% ee, >19:1 dr;  $[\alpha]_{24.5}^{25} = +168.2$  ( $c = 0.98$ ,  $\text{CH}_2\text{Cl}_2$ ); SFC (Lux 5u Cellulose-1,  $\text{CO}_2/\text{PrOH} = 90/10$ , flow rate = 0.8 mL/min,  $\lambda = 230$  nm),  $t_1 = 19.78$  min,  $t_2 = 20.76$  min.

<sup>1</sup>H NMR (400 MHz, Chloroform-*d*) δ 7.57 (s, 1H), 7.44 (q, *J* = 8.0 Hz, 2H), 5.75 (s, 1H), 3.75 (s, 3H), 3.56 (dd, *J* = 12.0, 4.8 Hz, 1H), 2.44 (s, 3H), 2.50 – 2.42 (m, 1H), 2.40 – 2.31 (m, 1H), 2.10 – 2.02 (m, 1H), 1.87 – 1.79 (m, 1H), 1.78 – 1.54 (m, 3H), 1.46 – 1.38 (m, 1H).

<sup>13</sup>C NMR (100 MHz, Chloroform-*d*) δ 210.2, 171.0, 141.6, 135.2, 134.9, 131.9, 123.4, 121.8, 68.3, 58.2, 53.8, 41.8, 26.7, 26.6, 24.3, 21.2.

HRMS (FTMS+c ESI) *m/z*: [M + Na]<sup>+</sup> calcd for [C<sub>16</sub>H<sub>19</sub>NO<sub>5</sub>S+Na<sup>+</sup>]: 360.0876, found 360.0870.

IR (film): ν (cm<sup>-1</sup>) 3285, 2948, 2868, 1744, 1705, 1490, 1451, 1363, 1301, 1165, 1022, 891, 787, 735, 571.

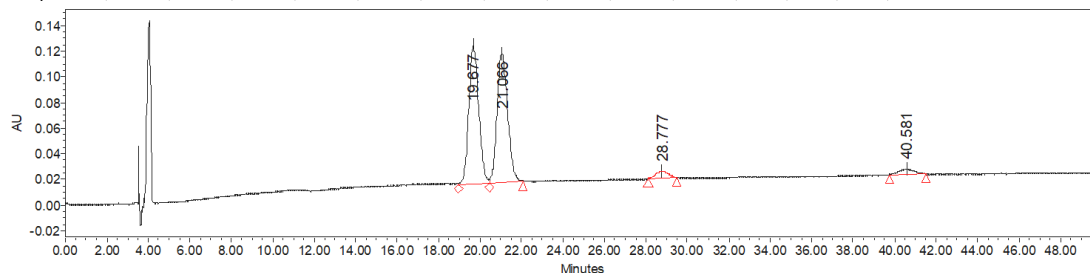

| Name | Retention Time | Area    | % Area |
|------|----------------|---------|--------|
| 1    | 19.677         | 3586177 | 47.17  |
| 2    | 21.066         | 3583042 | 47.13  |
| 3    | 28.777         | 218093  | 2.87   |
| 4    | 40.581         | 214711  | 2.82   |

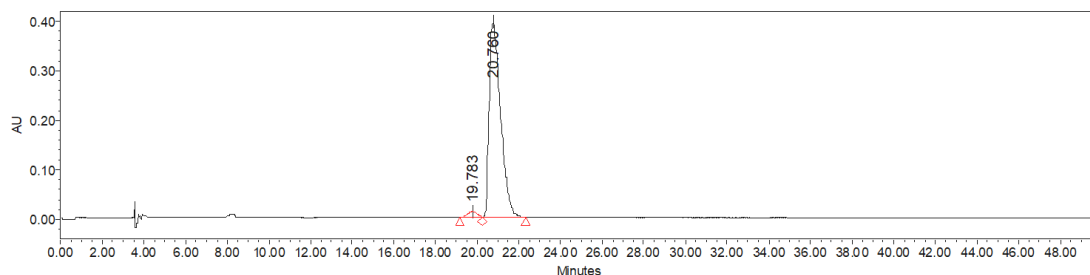

| Name | Retention Time | Area     | % Area |
|------|----------------|----------|--------|
| 1    | 19.783         | 374308   | 2.47   |
| 2    | 20.760         | 14783435 | 97.53  |

Methyl (*R*)-7-fluoro-3-((*R*)-2-oxocyclohexyl)-2,3-dihydrobenzo[*d*]isothiazole-3-carboxylate 1,1-dioxide **31a**

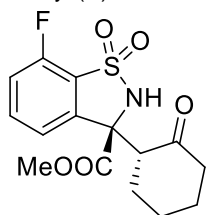

**Result:** white solid, m.p. 137 - 141 °C, 98% yield, 93% ee, >19:1 dr; [α]<sub>D</sub><sup>24.4</sup> = +135.9 (c = 1.01, CH<sub>2</sub>Cl<sub>2</sub>); SFC (Daicel chiralcel IC-3, CO<sub>2</sub>/MeOH = 80/20, flow rate = 1.5 mL/min, λ = 230 nm), *t*<sub>1</sub> = 4.25 min, *t*<sub>2</sub> = 4.72 min.

<sup>1</sup>H NMR (600 MHz, Chloroform-*d*) δ 7.68 (td, *J* = 7.8, 4.8 Hz, 1H), 7.37 (d, *J* = 7.8 Hz, 1H), 7.27 (d, *J* = 7.8 Hz, 1H), 5.88 (s, 1H), 3.80 (s, 3H), 3.59 (dd, *J* = 13.2, 5.4 Hz, 1H), 2.52 – 2.47 (m, 1H), 2.42 – 2.35 (m, 1H), 2.11 – 2.07 (m, 1H), 1.91 – 1.85 (m, 1H), 1.81 – 1.74 (m, 1H), 1.69 – 1.58 (m, 2H), 1.49 – 1.43 (m, 1H).

<sup>13</sup>C NMR (150 MHz, Chloroform-*d*) δ 209.8, 170.4, 156.5 (d, *J* = 258.6 Hz), 138.0, 136.2 (d, *J* = 7.3 Hz), 123.4 (d, *J* = 19.6 Hz), 119.5 (d, *J* = 4.0 Hz), 117.6 (d, *J* = 18.0 Hz), 68.7, 58.4, 54.1, 41.8, 26.7, 24.2.

<sup>19</sup>F NMR (564 MHz, Chloroform-*d*) δ -113.9.

HRMS (FTMS+c ESI) *m/z*: [M + H]<sup>+</sup> calcd for [C<sub>15</sub>H<sub>16</sub>FNO<sub>5</sub>S+H<sup>+</sup>]: 342.0806, found 342.0802.

IR (film): ν (cm<sup>-1</sup>) 3270, 2949, 2869, 1745, 1706, 1594, 1473, 1311, 1232, 1179, 771, 735, 592.

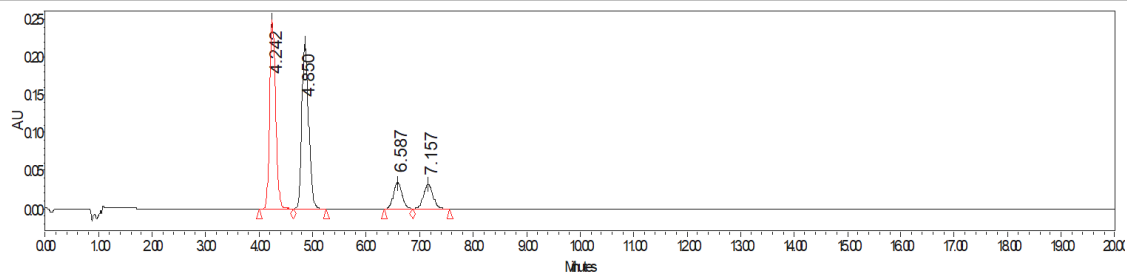

| Name | Retention Time | Area    | % Area |
|------|----------------|---------|--------|
| 1    | 4.242          | 1930230 | 41.44  |
| 2    | 4.850          | 1927503 | 41.38  |
| 3    | 6.587          | 396326  | 8.51   |
| 4    | 7.157          | 404068  | 8.67   |

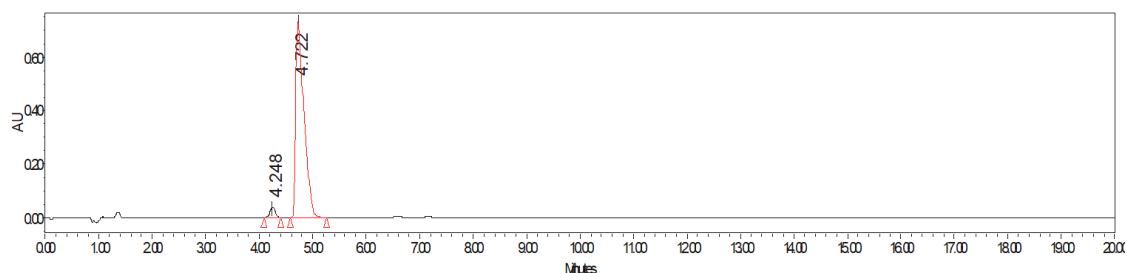

| Name | Retention Time | Area    | % Area |
|------|----------------|---------|--------|
| 1    | 4.248          | 286765  | 3.54   |
| 2    | 4.722          | 7803373 | 96.46  |

Methyl (*R*)-7-chloro-3-((*R*)-2-oxocyclohexyl)-2,3-dihydrobenzo[*d*]isothiazole-3-carboxylate 1,1-dioxide **3ma**

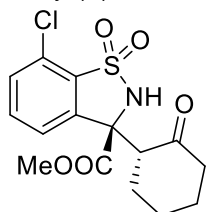

**Result:** white solid, m.p. 189 - 192 °C, 97% yield, 95% ee, >19:1 dr;  $[\alpha]_{D}^{24.3} = +170.7$  ( $c = 1.12$ ,  $\text{CH}_2\text{Cl}_2$ ); SFC (Daicel chiralcel OX-3,  $\text{CO}_2/\text{EtOH} = 80/20$ , flow rate = 1.5 mL/min,  $\lambda = 230$  nm),  $t_1 = 4.97$  min,  $t_2 = 6.32$  min.

**$^1\text{H NMR}$**  (400 MHz, Chloroform-*d*)  $\delta$  7.60 (t,  $J = 7.6$  Hz, 1H), 7.53 (d,  $J = 7.6$  Hz, 1H), 7.47 (d,  $J = 7.6$  Hz, 1H), 5.88 (s, 1H), 3.78 (s, 3H), 3.57 (dd,  $J = 12.8, 5.2$  Hz, 1H), 2.52 – 2.43 (m, 1H), 2.42 – 2.31 (m, 1H), 2.13 – 2.03 (m, 1H), 1.89 – 1.81 (m, 1H), 1.81 – 1.56 (m, 3H), 1.47 – 1.39 (m, 1H).

**$^{13}\text{C NMR}$**  (100 MHz, Chloroform-*d*)  $\delta$  209.8, 170.4, 137.4, 134.8, 133.1, 131.5, 129.6, 122.1, 67.7, 58.3, 54.1, 41.8, 26.6, 24.2.

**HRMS** (FTMS+c ESI)  $m/z$ :  $[\text{M} + \text{H}]^+$  calcd for  $[\text{C}_{15}\text{H}_{16}\text{Cl}^{34.9689}\text{NO}_5\text{S} + \text{H}^+]$ : 358.0510, found 358.0512.

**HRMS** (FTMS+c ESI)  $m/z$ :  $[\text{M} + \text{H}]^+$  calcd for  $[\text{C}_{15}\text{H}_{16}\text{Cl}^{36.9659}\text{NO}_5\text{S} + \text{H}^+]$ : 360.0481, found 360.0478.

**IR** (film):  $\nu$  ( $\text{cm}^{-1}$ ) 3270, 2948, 2869, 1744, 1706, 1588, 1454, 1263, 1229, 1172, 1137, 881, 735, 580.

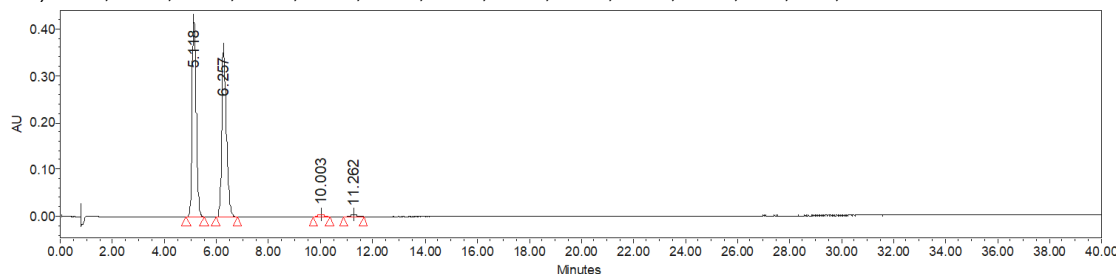

| Name | Retention Time | Area    | % Area |
|------|----------------|---------|--------|
| 1    | 5.118          | 4576090 | 49.07  |
| 2    | 6.257          | 4575973 | 49.06  |
| 3    | 10.003         | 89653   | 0.96   |
| 4    | 11.262         | 84828   | 0.91   |



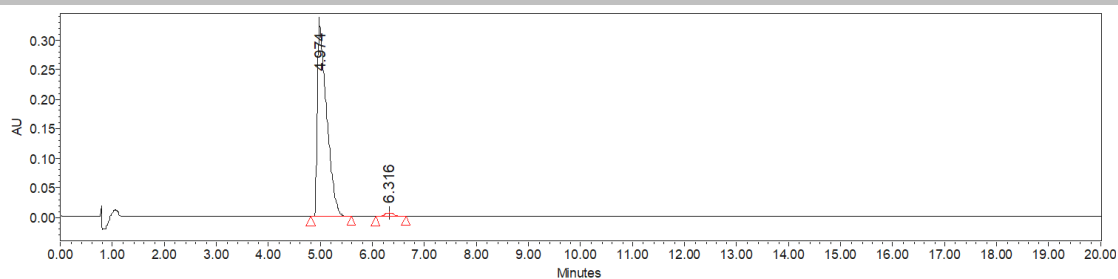

| Name | Retention Time | Area    | % Area |
|------|----------------|---------|--------|
| 1    | 4.974          | 4065404 | 97.64  |
| 2    | 6.316          | 98398   | 2.36   |

Methyl (*R*)-3-((*R*)-2-oxocyclohexyl)-7-(trifluoromethyl)-2,3-dihydrobenzo[*d*]isothiazole-3-carboxylate 1,1-dioxide **3na**

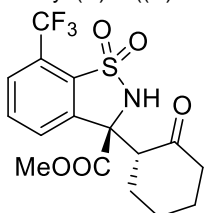

**Result:** white solid, m.p. 174 - 177 °C, 97% yield, 95% ee, >19:1 dr;  $[\alpha]_{D}^{25.1} = +151.2$  (c = 1.34, CH<sub>2</sub>Cl<sub>2</sub>); SFC (Daicel chiralcel OX-3, CO<sub>2</sub>/MeOH = 90/10, flow rate = 1.5 mL/min,  $\lambda = 230$  nm),  $t_1 = 6.13$  min,  $t_2 = 7.13$  min.

**<sup>1</sup>H NMR** (400 MHz, Chloroform-*d*)  $\delta$  7.89 – 7.79 (m, 3H), 5.95 (s, 1H), 3.79 (s, 3H), 3.60 (dd,  $J = 12.4, 4.4$  Hz, 1H), 2.54 – 2.45 (m, 1H), 2.44 – 2.32 (m, 1H), 2.13 – 2.04 (m, 1H), 1.91 – 1.82 (m, 1H), 1.81 – 1.54 (m, 3H), 1.45 – 1.36 (m, 1H).

**<sup>13</sup>C NMR** (100 MHz, Chloroform-*d*)  $\delta$  209.6, 170.4, 137.3, 134.1, 133.1, 128.7 (q,  $J = 4.6$  Hz), 127.8, 126.3 (d,  $J = 35.9$  Hz), 122.1 (d,  $J = 272.9$  Hz), 68.1, 58.4, 54.2, 41.7, 26.7, 26.6, 24.2.

**<sup>19</sup>F NMR** (376 MHz, Chloroform-*d*)  $\delta$  -59.5.

**HRMS** (FTMS+c ESI)  $m/z$ : [M + Na]<sup>+</sup> calcd for [C<sub>16</sub>H<sub>16</sub>F<sub>3</sub>NO<sub>5</sub>S+Na<sup>+</sup>]: 414.0593, found 414.0586.

**IR** (film):  $\nu$  (cm<sup>-1</sup>) 3286, 2950, 2870, 1739, 1704, 1589, 1438, 1327, 1267, 1234, 1019, 882, 773, 737, 583.

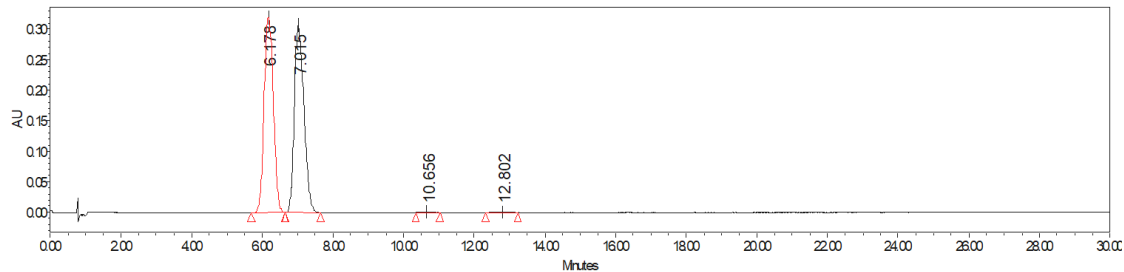

| Name | Retention Time | Area    | % Area |
|------|----------------|---------|--------|
| 1    | 6.178          | 5838818 | 49.76  |
| 2    | 7.015          | 5830271 | 49.69  |
| 3    | 10.656         | 31961   | 0.27   |
| 4    | 12.802         | 32441   | 0.28   |

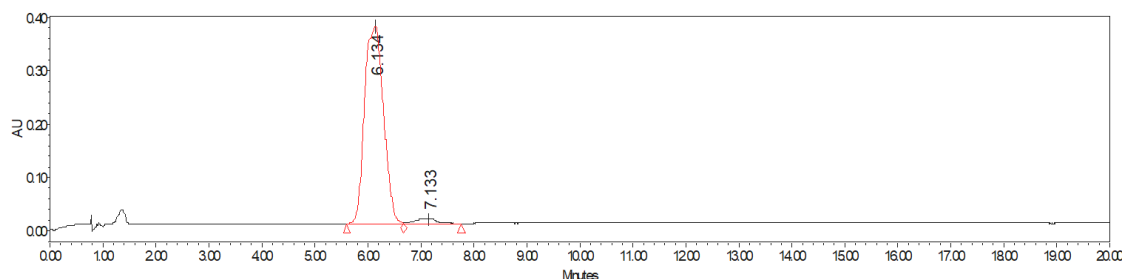

| Name | Retention Time | Area    | % Area |
|------|----------------|---------|--------|
| 1    | 6.134          | 9140954 | 97.33  |
| 2    | 7.133          | 250801  | 2.67   |

Methyl (*R*)-3-((*R*)-2-oxocyclohexyl)-2,3-dihydronaphtho[2,3-*d*]isothiazole-3-carboxylate 1,1-dioxide **3oa**

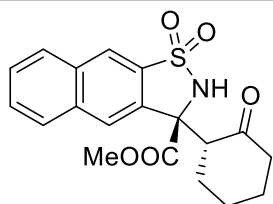

**Result:** white solid, m.p. 204 - 207 °C, 99% yield, 96% ee, >19:1 dr;  $[\alpha]^{25.4}_D = +200.0$  ( $c = 1.42$ ,  $\text{CH}_2\text{Cl}_2$ ); SFC (Daicel chiralcel IC-3,  $\text{CO}_2/\text{MeOH} = 80/20$ , flow rate = 1.5 mL/min,  $\lambda = 254$  nm),  $t_1 = 8.65$  min,  $t_2 = 9.19$  min,  $t_3 = 14.68$  min,  $t_4 = 17.16$  min.

**$^1\text{H NMR}$**  (400 MHz, Chloroform- $d$ )  $\delta$  8.39 (d,  $J = 8.0$  Hz, 1H), 8.11 (d,  $J = 8.4$  Hz, 1H), 7.97 (d,  $J = 8.0$  Hz, 1H), 7.70 (dt,  $J = 25.6, 7.2$  Hz, 2H), 7.56 (d,  $J = 8.4$  Hz, 1H), 5.94 (s, 1H), 3.78 (s, 3H), 3.70 (dd,  $J = 12.4, 4.8$  Hz, 1H), 2.54 – 2.46 (m, 1H), 2.45 – 2.34 (m, 1H), 2.11 – 2.02 (m, 1H), 1.87 – 1.56 (m, 4H), 1.45 – 1.37 (m, 1H).

**$^{13}\text{C NMR}$**  (100 MHz, Chloroform- $d$ )  $\delta$  210.0, 170.7, 135.0, 133.9, 133.7, 130.7, 129.4, 128.6, 128.4, 125.3, 123.1, 119.1, 68.6, 57.9, 54.0, 41.8, 26.6, 24.2.

**HRMS** (FTMS+c ESI)  $m/z$ :  $[\text{M} + \text{Na}]^+$  calcd for  $[\text{C}_{19}\text{H}_{19}\text{NO}_5\text{S} + \text{Na}^+]$ : 396.0876, found 396.0872.

**IR** (film):  $\nu$  ( $\text{cm}^{-1}$ ) 3280, 2947, 2868, 1741, 1706, 1434, 1356, 1253, 1220, 1158, 1132, 867, 828, 763, 735, 577.

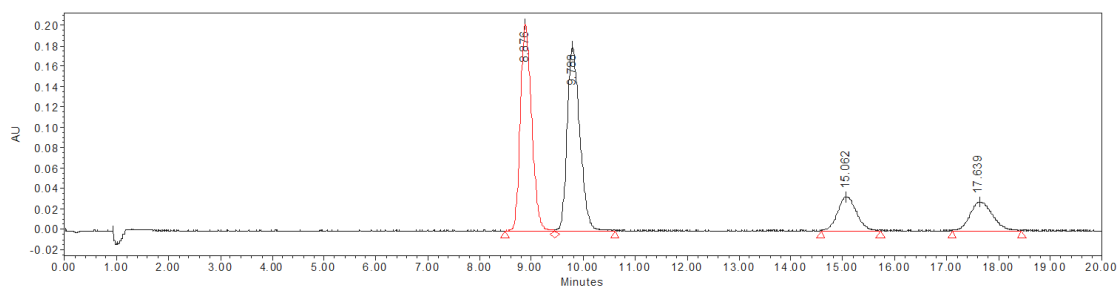

| Name | Retention Time | Area    | % Area |
|------|----------------|---------|--------|
| 1    | 8.876          | 3046795 | 39.23  |
| 2    | 9.788          | 3047838 | 39.25  |
| 3    | 15.062         | 828433  | 10.67  |
| 4    | 17.639         | 843019  | 10.86  |

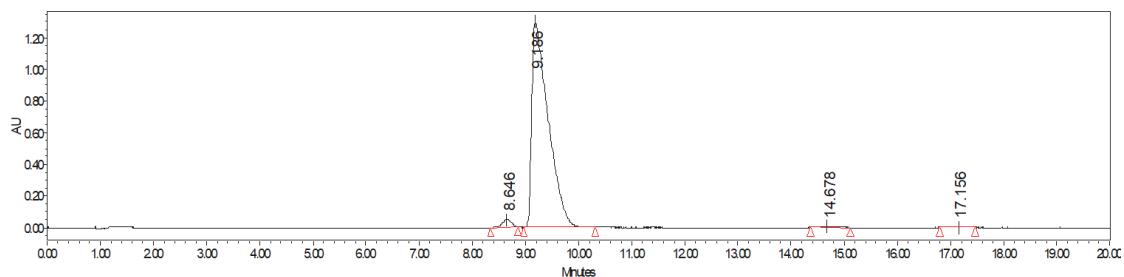

| Name | Retention Time | Area     | % Area |
|------|----------------|----------|--------|
| 1    | 8.646          | 587263   | 2.05   |
| 2    | 9.186          | 27921331 | 97.42  |
| 3    | 14.678         | 102545   | 0.36   |
| 4    | 17.156         | 50226    | 0.18   |

Methyl (*R*)-5-methoxy-3-((*S*)-4-oxotetrahydro-2H-pyran-3-yl)-2,3-dihydrobenzo[*d*]isothiazole-3-carboxylate 1,1-dioxide **3ab**

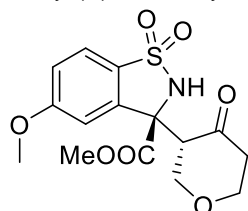

**Result:** colorless oil, 98% yield, 88% ee, >19:1 dr;  $[\alpha]^{24.3}_D = +117.6$  ( $c = 1.43$ ,  $\text{CH}_2\text{Cl}_2$ ); SFC (Daicel chiralcel IC-3,  $\text{CO}_2/\text{MeOH} = 80/20$ , flow rate = 1.5 mL/min,  $\lambda = 230$  nm),  $t_1 = 3.82$  min,  $t_2 = 7.10$  min.

**$^1\text{H NMR}$**  (400 MHz, Chloroform- $d$ )  $\delta$  7.68 (d,  $J = 8.8$  Hz, 1H), 7.11 (dd,  $J = 8.8, 2.4$  Hz, 1H), 7.01 (d,  $J = 2.4$  Hz, 1H), 5.78 (s, 1H), 4.26 (dd,  $J = 11.6, 7.6$  Hz, 1H), 3.89 (s, 3H), 3.82 (s, 3H), 3.83 – 3.78 (m, 1H), 3.72 – 3.62 (m, 3H), 2.77 – 2.67 (m, 1H), 2.48 – 2.42 (m, 1H).

**$^{13}\text{C NMR}$**  (100 MHz, Chloroform- $d$ )  $\delta$  205.4, 170.0, 164.2, 136.1, 127.0, 123.4, 117.9, 107.9, 67.7, 66.0, 57.9, 56.1, 54.2, 42.3.

**HRMS** (FTMS+c ESI)  $m/z$ :  $[M + H]^+$  calcd for  $[C_{15}H_{17}NO_7S+H^+]$ : 356.0798, found 356.0792.

**IR** (film):  $\nu$  ( $cm^{-1}$ ) 3274, 2957, 2872, 1746, 1713, 1599, 1486, 1290, 1241, 1187, 1136, 900, 735, 577.

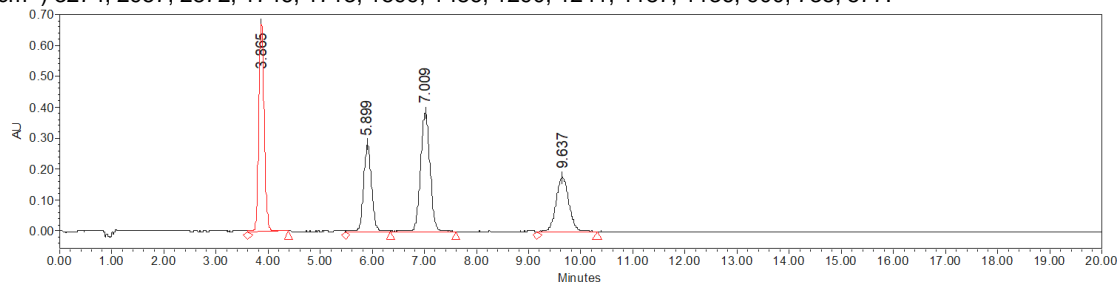

| Name  | Retention Time | Area  | % Area |
|-------|----------------|-------|--------|
| 3.865 | 4786874        | 30.97 | 3.865  |
| 5.899 | 2929258        | 18.95 | 5.899  |
| 7.009 | 4796812        | 31.04 | 7.009  |
| 9.637 | 2941725        | 19.03 | 9.637  |

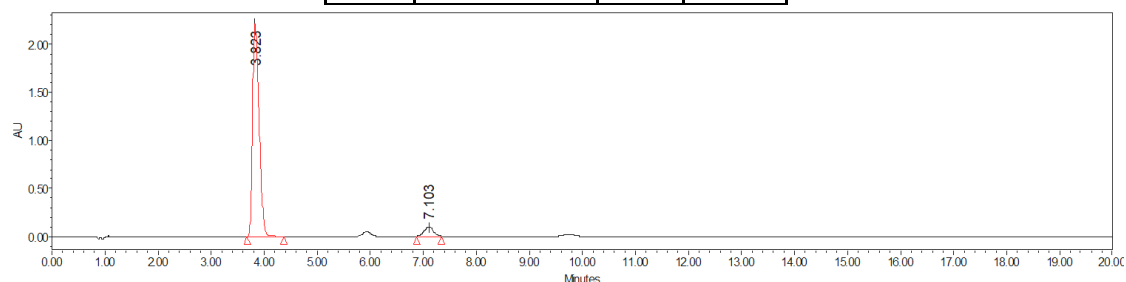

| Name  | Retention Time | Area  | % Area |
|-------|----------------|-------|--------|
| 3.823 | 18875201       | 93.98 | 3.823  |
| 7.103 | 1208679        | 6.02  | 7.103  |

Methyl (*R*)-3-((*R*)-1-(tert-butoxycarbonyl)-4-oxopiperidin-3-yl)-5-methoxy-2,3-dihydrobenzo[*d*]isothiazole-3-carboxylate 1,1-dioxide  
**3ac**

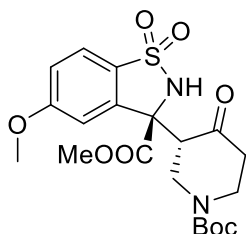

**Result**: colorless oil, 97% yield, 84% ee, >19:1 dr;  $[\alpha]_D^{24.7} = +100.3$  ( $c = 1.21$ ,  $CH_2Cl_2$ ); SFC (Lux 5u Cellulose-1,  $CO_2/EtOH = 95/5$ , flow rate = 1.0 mL/min,  $\lambda = 230$  nm),  $t_1 = 27.55$  min,  $t_2 = 29.00$  min.

**$^1H$  NMR** (400 MHz, Chloroform-*d*)  $\delta$  7.78 – 7.61 (m, 1H), 7.11 (d,  $J = 8.4$  Hz, 1H), 7.03 (d,  $J = 2.4$  Hz, 1H), 5.78 (s, 1H), 4.50 – 4.20 (m, 1H), 3.88 (s, 3H), 3.81 (s, 3H), 3.86 – 3.46 (m, 2H), 3.16 – 2.88 (m, 2H), 2.62 – 2.47 (m, 1H), 2.46 – 2.39 (m, 1H), 1.37 (s, 9H).

**$^{13}C$  NMR** (100 MHz, Chloroform-*d*)  $\delta$  206.4, 170.1, 164.2, 154.1, 136.3, 127.0, 123.4, 117.0, 108.2, 80.7, 66.5, 57.8, 56.0, 54.2, 43.9, 43.1, 41.2, 28.1.

**HRMS** (FTMS+c ESI)  $m/z$ :  $[M + Na]^+$  calcd for  $[C_{20}H_{26}N_2O_8S+Na^+]$ : 477.1302, found 477.1294.

**IR** (film):  $\nu$  ( $cm^{-1}$ ) 3273, 2976, 1740, 1699, 1599, 1484, 1423, 1367, 1305, 1249, 1137, 1020, 855, 735, 578.

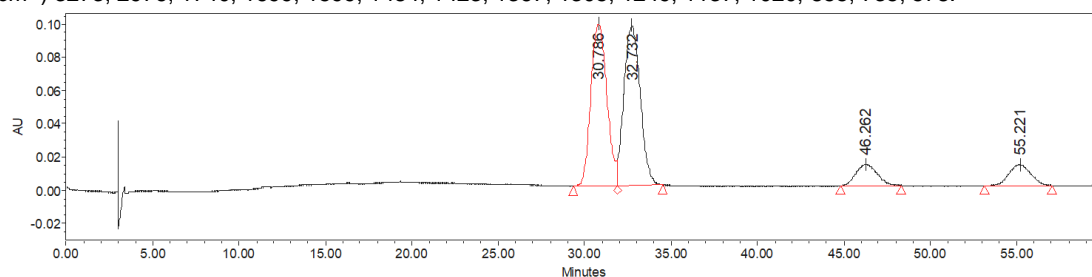

| Name | Retention Time | Area    | % Area |
|------|----------------|---------|--------|
| 1    | 30.786         | 6311936 | 42.49  |
| 2    | 32.732         | 6356623 | 42.79  |
| 3    | 46.262         | 1093055 | 7.36   |
| 4    | 55.221         | 1093472 | 7.36   |

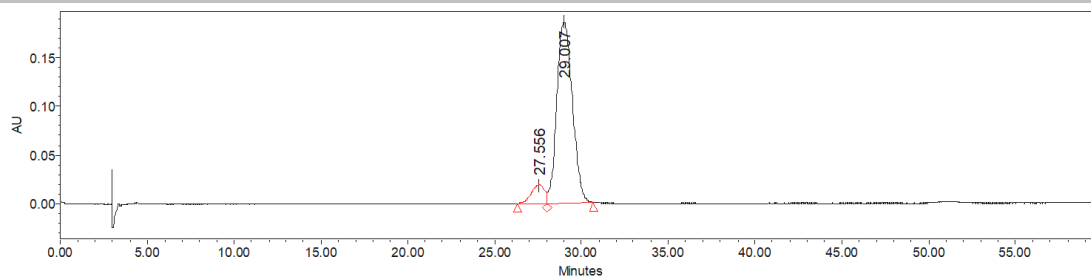

| Name | Retention Time | Area     | % Area |
|------|----------------|----------|--------|
| 1    | 27.556         | 1017479  | 8.06   |
| 2    | 29.007         | 11602076 | 91.94  |

Methyl (*R*)-5-methoxy-3-((*R*)-4-oxotetrahydro-2H-thiopyran-3-yl)-2,3-dihydrobenzo[*d*]isothiazole-3-carboxylate 1,1-dioxide **3ad**

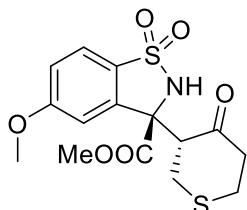

**Result:** colorless oil, 95% yield, 96% ee, >19:1 dr;  $[\alpha]^{24.1}_D = +142.7$  ( $c = 1.46$ ,  $\text{CH}_2\text{Cl}_2$ ); SFC (Daicel chiralcel IC-3,  $\text{CO}_2/\text{MeOH} = 80/20$ , flow rate = 1.5 mL/min,  $\lambda = 230$  nm),  $t_1 = 5.61$  min,  $t_2 = 6.56$  min.

**$^1\text{H NMR}$**  (400 MHz, Chloroform-*d*)  $\delta$  7.69 (d,  $J = 8.8$  Hz, 1H), 7.11 (dd,  $J = 8.8, 1.6$  Hz, 1H), 7.00 – 6.97 (m, 1H), 5.80 (s, 1H), 3.89 (s, 3H), 3.90 – 3.84 (m, 1H), 3.78 (s, 3H), 3.04 – 2.92 (m, 2H), 2.91 – 2.72 (m, 3H), 2.24 (dt,  $J = 13.6, 3.6$  Hz, 1H).

**$^{13}\text{C NMR}$**  (100 MHz, Chloroform-*d*)  $\delta$  207.4, 170.2, 164.2, 136.4, 127.3, 123.5, 117.6, 107.9, 67.9, 60.6, 56.0, 54.1, 44.5, 29.8, 29.5.

**HRMS** (FTMS+c ESI)  $m/z$ :  $[\text{M} + \text{Na}]^+$  calcd for  $[\text{C}_{15}\text{H}_{17}\text{NO}_6\text{S}_2 + \text{Na}]^+$ : 394.0389, found 394.0369.

**IR** (film):  $\nu$  ( $\text{cm}^{-1}$ ) 3280, 2954, 2843, 1748, 1707, 1599, 1486, 1434, 1302, 1257, 1185, 1133, 1017, 897, 832, 735, 710, 757.

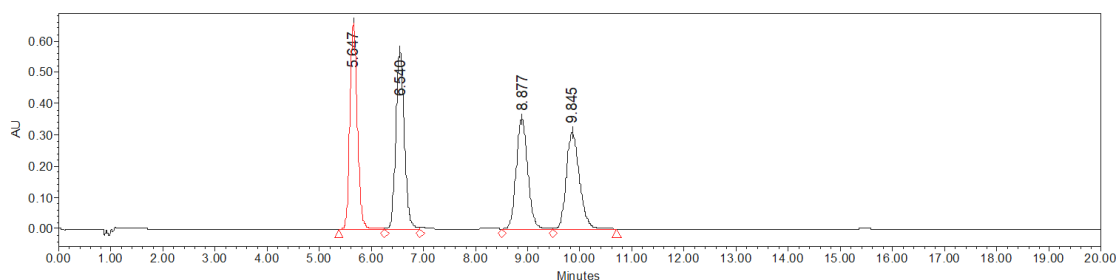

| Name | Retention Time | Area    | % Area |
|------|----------------|---------|--------|
| 1    | 5.647          | 6475799 | 27.29  |
| 2    | 6.540          | 6457352 | 27.21  |
| 3    | 8.877          | 5403142 | 22.77  |
| 4    | 9.845          | 5396951 | 22.74  |

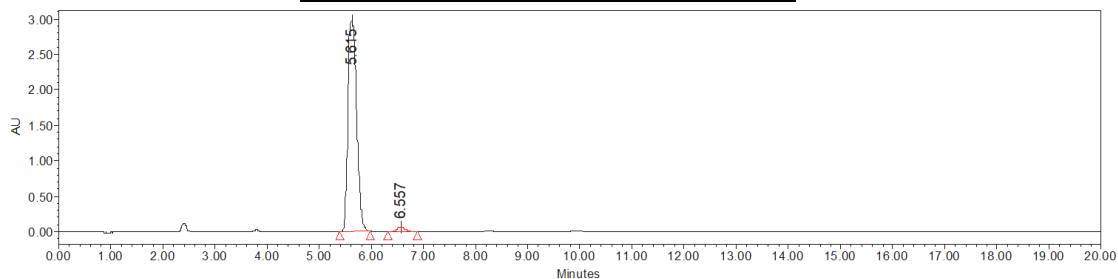

| Name | Retention Time | Area     | % Area |
|------|----------------|----------|--------|
| 1    | 5.615          | 34854222 | 97.96  |
| 2    | 6.557          | 725922   | 2.04   |

Methyl (*R*)-3-((*R*)-5,5-dimethyl-2-oxocyclohexyl)-5-methoxy-2,3-dihydrobenzo[*d*]isothiazole-3-carboxylate 1,1-dioxide **3ae**

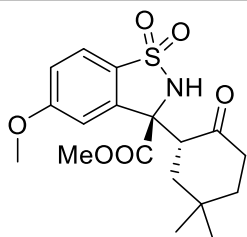

**Result:** colorless oil, 99% yield, 97% ee, >19:1 dr;  $[\alpha]^{24.9}_D = +168.2$  ( $c = 1.28$ ,  $\text{CH}_2\text{Cl}_2$ ); SFC ((Lux 5u Cellulose-1,  $\text{CO}_2/\text{PrOH} = 90/10$ , flow rate = 1.0 mL/min,  $\lambda = 230$  nm),  $t_1 = 12.59$  min,  $t_2 = 13.72$  min,  $t_3 = 20.71$  min,  $t_4 = 28.77$  min).

**$^1\text{H NMR}$**  (400 MHz, Chloroform- $d$ )  $\delta$  7.67 (d,  $J = 8.8$  Hz, 1H), 7.09 (dd,  $J = 8.8, 2.0$  Hz, 1H), 6.92 (d,  $J = 2.0$  Hz, 1H), 5.72 (s, 1H), 3.87 (s, 3H), 3.77 (s, 3H), 3.67 (dd,  $J = 13.6, 5.2$  Hz, 1H), 2.58 – 2.46 (m, 1H), 2.36 – 2.28 (m, 1H), 1.74 – 1.58 (m, 3H), 1.14 (s, 3H), 1.07 – 1.00 (m, 1H), 0.92 (s, 3H).

**$^{13}\text{C NMR}$**  (100 MHz, Chloroform- $d$ )  $\delta$  210.5, 171.0, 164.1, 137.1, 127.2, 123.3, 117.3, 107.6, 68.2, 56.0, 54.4, 54.0, 38.7, 38.6, 37.8, 31.2, 30.4, 24.4.

**HRMS** (FTMS+c ESI)  $m/z$ :  $[\text{M} + \text{Na}]^+$  calcd for  $[\text{C}_{18}\text{H}_{23}\text{NO}_6\text{S} + \text{Na}^+]$ : 378.1597, found 378.1588.

**IR** (film):  $\nu$  ( $\text{cm}^{-1}$ ) 3285, 2956, 1737, 1598, 1485, 1301, 1249, 1182, 1133, 1020, 903, 735, 577.

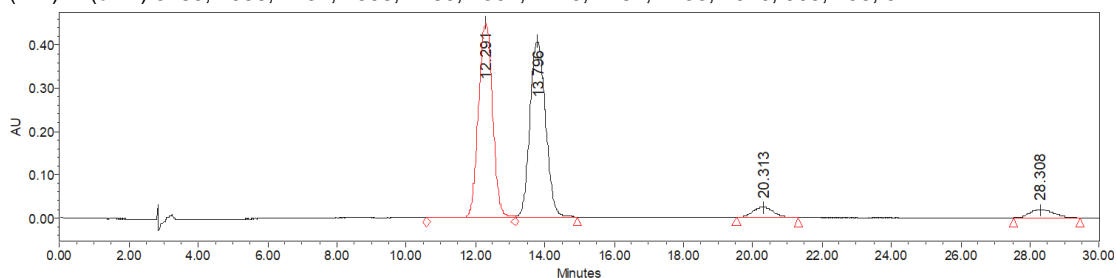

| Name | Retention Time | Area     | % Area |
|------|----------------|----------|--------|
| 1    | 12.291         | 12753543 | 46.67  |
| 2    | 13.796         | 12696128 | 46.46  |
| 3    | 20.313         | 954946   | 3.49   |
| 4    | 28.308         | 920296   | 3.37   |

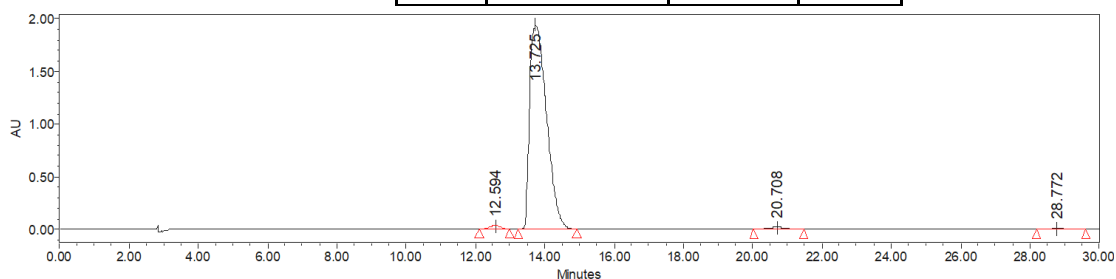

| Name | Retention Time | Area     | % Area |
|------|----------------|----------|--------|
| 1    | 12.594         | 883924   | 1.29   |
| 2    | 13.725         | 66217231 | 96.63  |
| 3    | 20.708         | 932107   | 1.36   |
| 4    | 28.772         | 496704   | 0.72   |

Methyl (R)-5-methoxy-3-((R)-8-oxo-1,4-dioxaspiro[4.5]decan-7-yl)-2,3-dihydrobenzo[d]isothiazole-3-carboxylate 1,1-dioxide **3af**

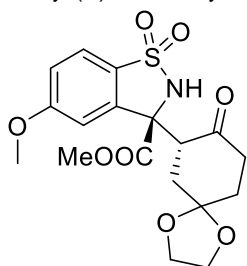

**Result:** colorless oil, 99% yield, 95% ee, >19:1 dr;  $[\alpha]^{24.8}_D = +142.5$  ( $c = 1.21$ ,  $\text{CH}_2\text{Cl}_2$ ); SFC ((Lux 5u Cellulose-1,  $\text{CO}_2/\text{MeOH} = 90/10$ , flow rate = 1.0 mL/min,  $\lambda = 254$  nm),  $t_1 = 14.03$  min,  $t_2 = 16.05$  min).

**$^1\text{H NMR}$**  (400 MHz, Chloroform- $d$ )  $\delta$  7.67 (d,  $J = 8.8$  Hz, 1H), 7.09 (dd,  $J = 8.8, 1.6$  Hz, 1H), 6.96 (s, 1H), 5.74 (s, 1H), 4.00 – 3.95 (m, 1H), 3.95 – 3.82 (m, 4H), 3.88 (s, 3H), 3.78 (s, 3H), 2.77 – 2.65 (m, 1H), 2.47 – 2.38 (m, 1H), 2.12 – 1.92 (m, 3H), 1.42 – 1.35 (m, 1H).

**<sup>13</sup>C NMR** (100 MHz, Chloroform-*d*) δ 208.7, 170.5, 164.1, 136.8, 127.3, 123.4, 117.5, 107.8, 107.1, 67.9, 64.7, 64.5, 56.1, 54.9, 54.0, 37.8, 34.0, 33.6.

**HRMS** (FTMS+c ESI) *m/z*: [M + Na]<sup>+</sup> calcd for [C<sub>18</sub>H<sub>21</sub>NO<sub>6</sub>S+Na<sup>+</sup>]: 434.0880, found 434.0875.

**IR** (film): ν (cm<sup>-1</sup>) 3280, 2959, 2895, 1746, 1714, 1598, 1485, 1438, 1250, 1137, 1054, 1022, 839, 734, 578.

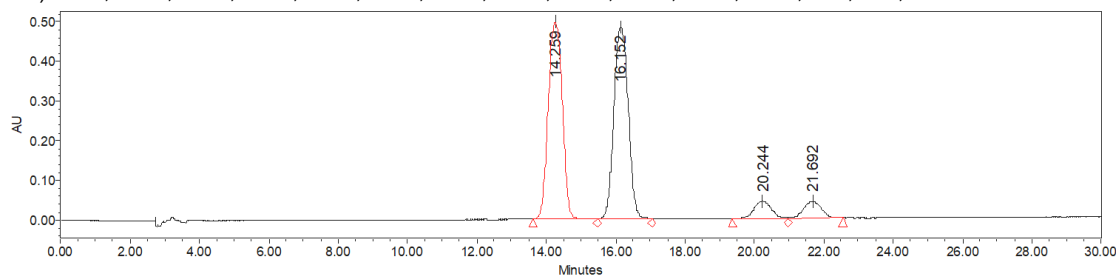

| Name | Retention Time | Area     | % Area |
|------|----------------|----------|--------|
| 1    | 14.259         | 13941025 | 45.20  |
| 2    | 16.152         | 13865305 | 44.96  |
| 3    | 20.244         | 1529633  | 4.96   |
| 4    | 21.692         | 1506586  | 4.88   |

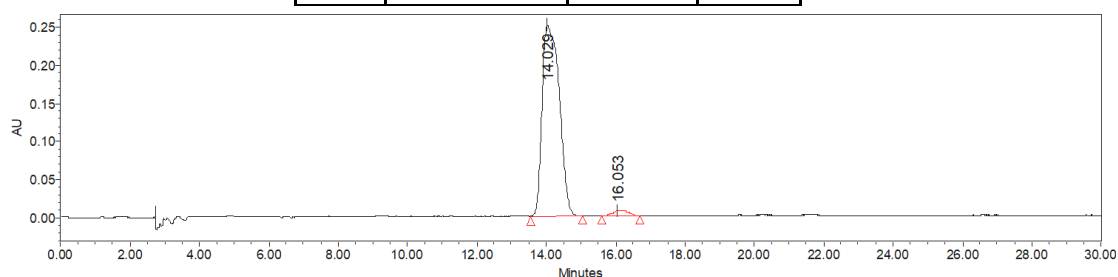

| Name | Retention Time | Area    | % Area |
|------|----------------|---------|--------|
| 1    | 14.029         | 8638518 | 97.41  |
| 2    | 16.053         | 229305  | 2.59   |

Methyl (*R*)-5-methoxy-3-((1*R*,5*S*)-2-oxo-5-phenylcyclohexyl)-2,3-dihydrobenzo[*d*]isothiazole-3-carboxylate 1,1-dioxide **3ag**

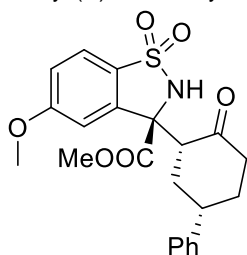

**Result:** colorless oil, 88% yield, 93% ee, >19:1 dr; [α]<sub>D</sub><sup>24.8</sup> = +169.0 (c = 0.98, CH<sub>2</sub>Cl<sub>2</sub>); SFC ((Daicel chiralcel OX-3, CO<sub>2</sub>/MeOH = 80/20, flow rate = 1.5 mL/min, λ = 230 nm), *t*<sub>1</sub> = 6.28 min, *t*<sub>2</sub> = 15.44 min).

**<sup>1</sup>H NMR** (600 MHz, Chloroform-*d*) δ 7.65 (d, *J* = 8.4 Hz, 1H), 7.27 – 7.23 (m, 2H), 7.19 – 7.13 (m, 3H), 7.05 (dd, *J* = 8.4, 2.4 Hz, 1H), 6.97 (d, *J* = 1.8 Hz, 1H), 5.80 (s, 1H), 3.87 (s, 3H), 3.83 – 3.74 (m, 1H), 3.81 (s, 1H), 3.11 – 3.03 (m, 1H), 2.66 – 2.54 (m, 2H), 2.25 – 2.17 (m, 1H), 2.13 (q, *J* = 13.2 Hz, 1H), 1.94 – 1.84 (m, 1H), 1.62 – 1.56 (m, 1H).

**<sup>13</sup>C NMR** (150 MHz, Chloroform-*d*) δ 209.3, 170.8, 164.0, 143.6, 137.0, 128.6, 127.3, 126.8, 126.7, 123.4, 117.1, 108.1, 68.2, 57.9, 56.0, 54.0, 42.5, 41.3, 34.6, 32.7.

**HRMS** (FTMS+c ESI) *m/z*: [M + Na]<sup>+</sup> calcd for [C<sub>22</sub>H<sub>23</sub>NO<sub>6</sub>S+H<sup>+</sup>]: 430.1318, found 430.1315.

**IR** (film): ν (cm<sup>-1</sup>) 3287, 2950, 2870, 1743, 1710, 1599, 1485, 1287, 1249, 1135, 1020, 896, 849, 759, 735, 702, 574.

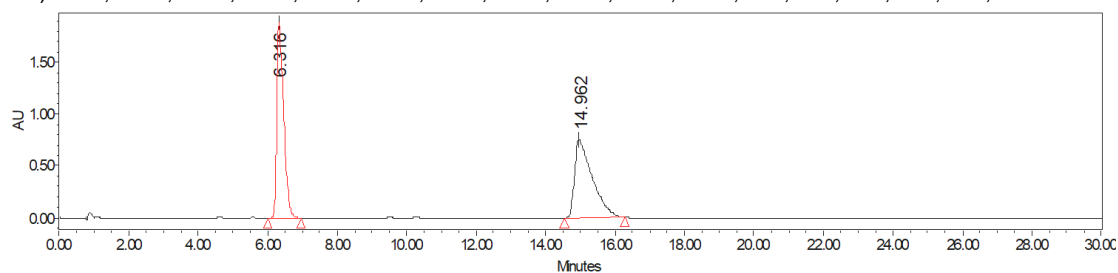

| Name | Retention Time | Area | % Area |
|------|----------------|------|--------|
| 1    | 6.316          |      |        |
| 2    | 14.962         |      |        |

|   |        |          |       |
|---|--------|----------|-------|
| 1 | 6.316  | 25721926 | 49.39 |
| 2 | 14.962 | 26354762 | 50.61 |

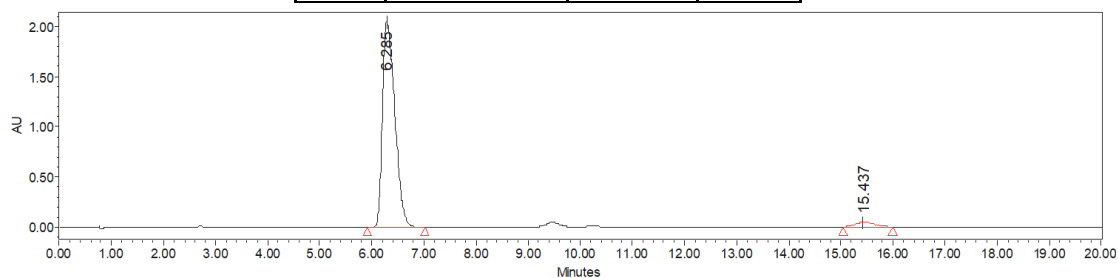

| Name | Retention Time | Area     | % Area |
|------|----------------|----------|--------|
| 1    | 6.285          | 33663845 | 96.55  |
| 2    | 15.437         | 1201909  | 3.45   |

Methyl (*R*)-3-((1*R*,5*S*)-5-(*tert*-butyl)-2-oxocyclohexyl)-5-methoxy-2,3-dihydrobenzo[*d*]isothiazole-3-carboxylate 1,1-dioxide **3ah**

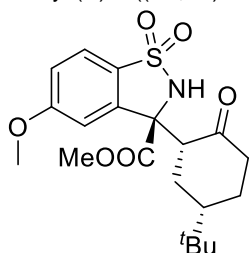

**Result:** white solid, m.p. 159 - 162 °C, 99% yield, 93% ee, >19:1 dr;  $[\alpha]_D^{26} = +139.8$  ( $c = 1.36$ ,  $\text{CH}_2\text{Cl}_2$ ); SFC ((Daicel chiralcel ID-3,  $\text{CO}_2/\text{MeOH} = 90/10$ , flow rate = 1.5 mL/min,  $\lambda = 230$  nm),  $t_1 = 6.90$  min,  $t_2 = 8.87$  min).

**$^1\text{H NMR}$**  (400 MHz, Chloroform-*d*)  $\delta$  7.68 (d,  $J = 8.8$  Hz, 1H), 7.09 (dd,  $J = 8.8, 2.4$  Hz, 1H), 6.95 (d,  $J = 2.4$  Hz, 1H), 5.72 (s, 1H), 3.88 (s, 3H), 3.77 (s, 3H), 3.55 (dd,  $J = 12.0, 5.6$  Hz, 1H), 2.54 – 2.43 (m, 1H), 2.43 – 2.32 (m, 1H), 2.13 – 2.03 (m, 1H), 1.61 – 1.38 (m, 4H), 0.77 (s, 9H).

**$^{13}\text{C NMR}$**  (100 MHz, Chloroform-*d*)  $\delta$  210.4, 170.9, 164.0, 137.4, 127.4, 123.3, 117.2, 107.8, 68.4, 57.8, 56.0, 53.9, 46.2, 41.1, 32.5, 27.6, 27.5, 27.4.

**HRMS** (FTMS+c ESI)  $m/z$ :  $[\text{M} + \text{Na}]^+$  calcd for  $[\text{C}_{20}\text{H}_{27}\text{NO}_6\text{S} + \text{H}^+]$ : 410.1631, found 410.1630.

**IR** (film):  $\nu$  ( $\text{cm}^{-1}$ ) 3287, 2959, 2871, 1741, 1710, 1598, 1484, 1368, 1250, 1185, 1136, 1021, 898, 736, 577.

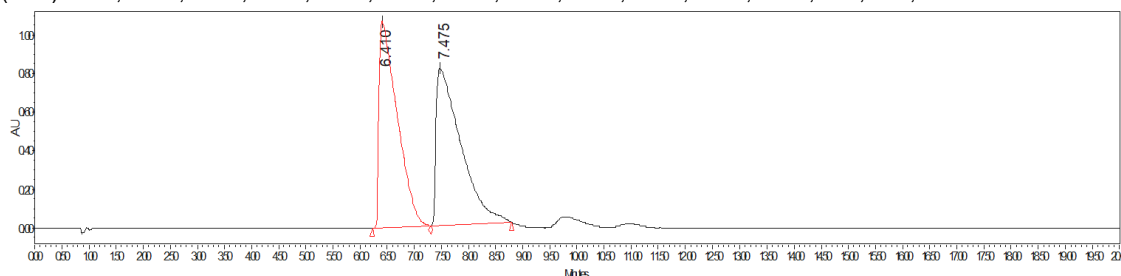

| Name | Retention Time | Area     | % Area |
|------|----------------|----------|--------|
| 1    | 6.410          | 24593296 | 49.27  |
| 2    | 7.475          | 25323265 | 50.73  |

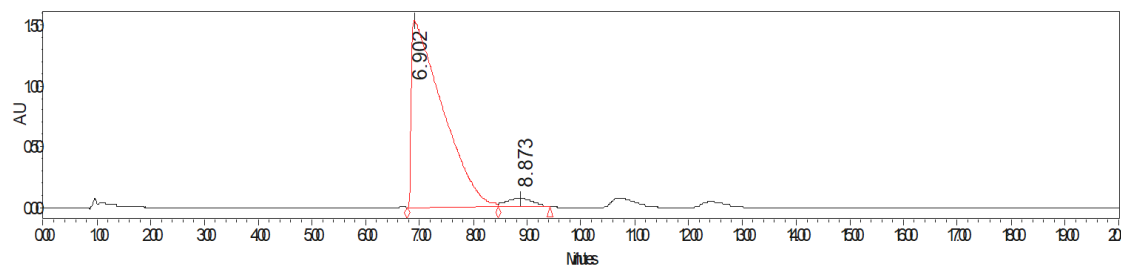

| Name | Retention Time | Area     | % Area |
|------|----------------|----------|--------|
| 1    | 6.902          | 61961511 | 96.46  |
| 2    | 8.873          | 2272565  | 3.54   |

Methyl (*R*)-5-methoxy-3-((*S*)-2-oxocyclohexyl)-2,3-dihydrobenzo[*d*]isothiazole-3-carboxylate 1,1-dioxide **4aa**

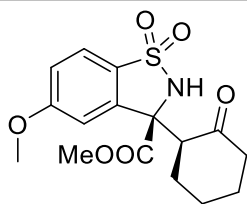

**Result:** white solid, 98% yield, 94% ee, 89:11 dr; SFC (Daicel chiralcel IC-3, CO<sub>2</sub>/MeOH = 80/20, flow rate = 1.5 mL/min, λ = 230 nm), *t*<sub>1</sub> = 5.81 min, *t*<sub>2</sub> = 6.78 min, *t*<sub>3</sub> = 7.96 min, *t*<sub>4</sub> = 10.42 min.

**<sup>1</sup>H NMR** (600 MHz, Chloroform-*d*) δ 7.68 (d, *J* = 8.4 Hz, 1H), 7.06 (dd, *J* = 8.4, 2.4 Hz, 1H), 6.95 (d, *J* = 2.4 Hz, 1H), 5.91 (s, 1H), 3.86 (s, 3H), 3.82 (s, 3H), 3.14 (dd, *J* = 12.0, 6.6 Hz, 1H), 2.48 – 2.41 (m, 1H), 2.40 – 2.32 (m, 1H), 2.15 – 2.04 (m, 3H), 1.97 – 1.89 (m, 1H), 1.77 – 1.54 (m, 2H).

**<sup>13</sup>C NMR** (150 MHz, Chloroform-*d*) δ 209.0, 169.9, 162.9, 138.5, 128.5, 122.9, 116.1, 111.1, 67.2, 59.6, 55.9, 53.7, 42.3, 30.5, 27.2, 25.1.

**HRMS** (FTMS+c ESI) *m/z*: [M + Na]<sup>+</sup> calcd for [C<sub>16</sub>H<sub>19</sub>NO<sub>6</sub>S+Na<sup>+</sup>]: 376.0825, found 376.0823.

**IR** (film): ν (cm<sup>-1</sup>) 3274, 2952, 2866, 1740, 1710, 1596, 1484, 1435, 1288, 1250, 1184, 1135, 1019, 898, 832, 736, 579.

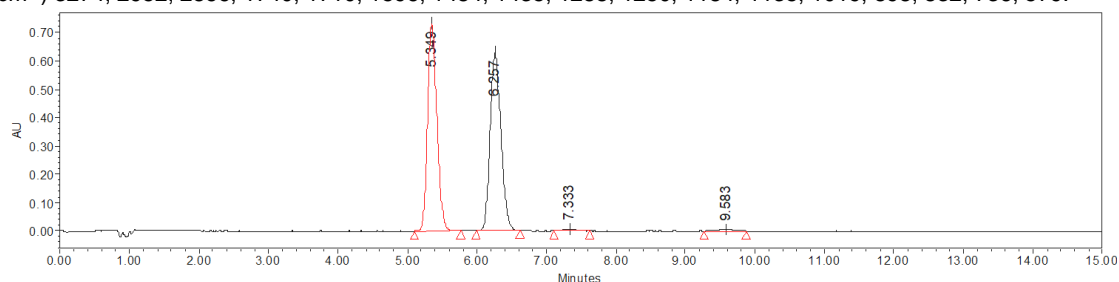

| Name | Retention Time | Area    | % Area |
|------|----------------|---------|--------|
| 1    | 5.349          | 6839316 | 49.30  |
| 2    | 6.257          | 6848656 | 49.37  |
| 3    | 7.333          | 92225   | 0.66   |
| 4    | 9.583          | 92476   | 0.67   |

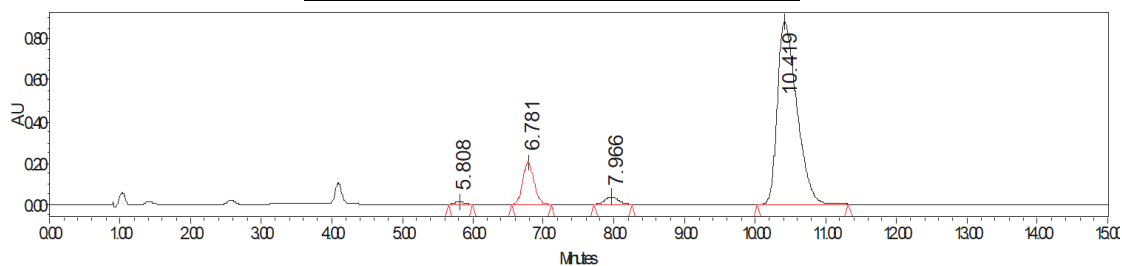

| Name | Retention Time | Area     | % Area |
|------|----------------|----------|--------|
| 1    | 5.808          | 121537   | 0.62   |
| 2    | 6.781          | 2306892  | 11.75  |
| 3    | 7.966          | 491206   | 2.50   |
| 4    | 10.419         | 16713162 | 85.13  |

Methyl (*R*)-3-((*S*)-2-oxocyclohexyl)-2,3-dihydrobenzo[*d*]isothiazole-3-carboxylate 1,1-dioxide **4ba**

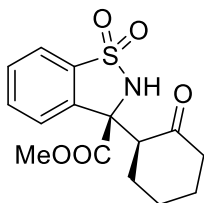

**Result:** white solid, 99% yield, 93% ee, 90:10 dr; SFC (Daicel chiralcel IC-3, CO<sub>2</sub>/MeOH = 80/20, flow rate = 1.5 mL/min, λ = 210 nm), *t*<sub>1</sub> = 4.12 min, *t*<sub>2</sub> = 4.52 min, *t*<sub>3</sub> = 5.62 min, *t*<sub>4</sub> = 6.41 min.

**<sup>1</sup>H NMR** (400 MHz, Chloroform-*d*) δ 7.81 – 7.75 (m, 1H), 7.63 – 7.55 (m, 2H), 7.55 – 7.50 (m, 1H), 5.98 (s, 1H), 3.81 (s, 3H), 3.14 (dd, *J* = 12.4, 6.4 Hz, 1H), 2.48 – 2.41 (m, 1H), 2.40 – 2.30 (m, 1H), 2.16 – 2.02 (m, 3H), 1.96 – 1.88 (m, 1H), 1.74 – 1.51 (m, 2H).

**<sup>13</sup>C NMR** (100 MHz, Chloroform-*d*) δ 209.0, 170.0, 136.4, 135.9, 132.6, 130.3, 126.1, 121.5, 67.6, 59.5, 53.7, 42.2, 30.6, 27.1, 25.0.

**HRMS** (FTMS+c ESI) *m/z*: [M + Na]<sup>+</sup> calcd for [C<sub>15</sub>H<sub>17</sub>NO<sub>5</sub>S+Na<sup>+</sup>]: 346.0720, found 346.0701.

**IR** (film): ν (cm<sup>-1</sup>) 3275, 2953, 2866, 1740, 1710, 1452, 1303, 1250, 1172, 1134, 1050, 883, 761, 735, 567.



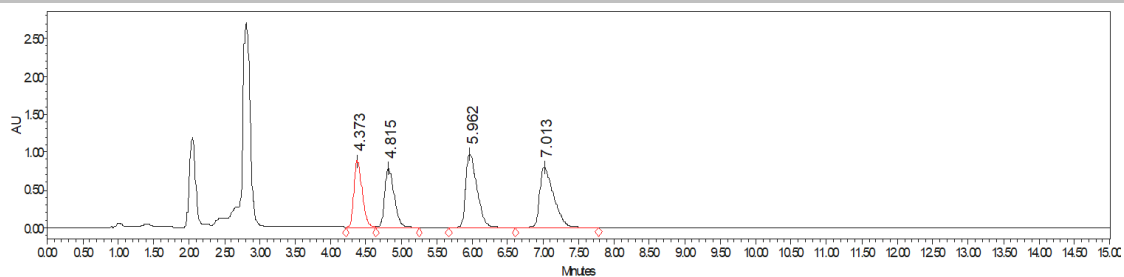

| Name | Retention Time | Area     | % Area |
|------|----------------|----------|--------|
| 1    | 4.373          | 7366220  | 19.88  |
| 2    | 4.815          | 7547147  | 20.37  |
| 3    | 5.962          | 11008677 | 29.72  |
| 4    | 7.013          | 11122363 | 30.02  |

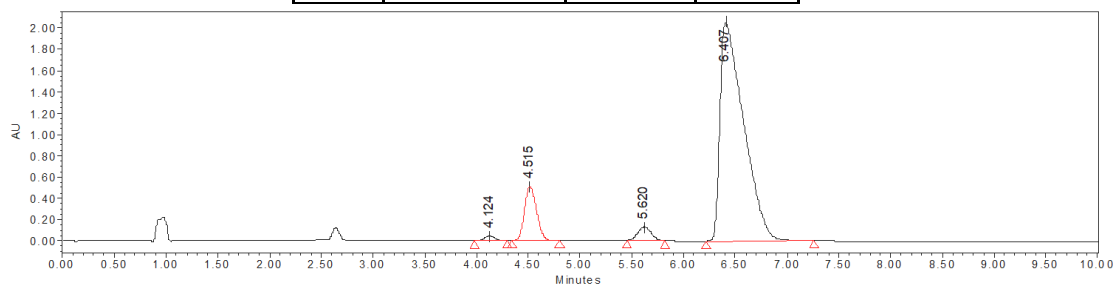

| Name | Retention Time | Area     | % Area |
|------|----------------|----------|--------|
| 1    | 4.124          | 345079   | 0.91   |
| 2    | 4.515          | 4172655  | 10.96  |
| 3    | 5.620          | 1166078  | 3.06   |
| 4    | 6.407          | 32390075 | 85.07  |

Ethyl (*R*)-3-((*S*)-2-oxocyclohexyl)-2,3-dihydrobenzo[d]isothiazole-3-carboxylate 1,1-dioxide **4ca**

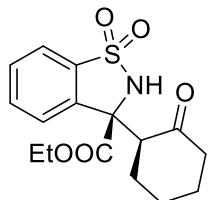

**Result:** white solid, 97% yield, 90% ee, 91:9 dr; SFC (Daicel chiralcel OX-3, CO<sub>2</sub>/EtOH = 90/10, flow rate = 1.5 mL/min, λ = 210 nm), t<sub>1</sub> = 8.18 min, t<sub>2</sub> = 9.06 min, t<sub>3</sub> = 11.58 min, t<sub>4</sub> = 17.54 min.

**<sup>1</sup>H NMR** (600 MHz, Chloroform-*d*) δ 7.80 – 7.75 (m, 1H), 7.63 – 7.56 (m, 2H), 7.55 – 7.50 (m, 1H), 5.97 (s, 1H), 4.33 – 4.23 (m, 2H), 3.13 (dd, *J* = 13.2, 5.4 Hz, 1H), 2.49 – 2.41 (m, 1H), 2.39 – 2.31 (m, 1H), 2.17 – 2.01 (m, 3H), 1.96 – 1.89 (m, 1H), 1.76 – 1.53 (m, 3H), 1.30 (t, *J* = 7.2 Hz, 3H).

**<sup>13</sup>C NMR** (150 MHz, Chloroform-*d*) δ 208.7, 169.4, 136.6, 136.2, 132.5, 130.3, 126.0, 121.5, 67.6, 63.1, 59.4, 42.2, 30.7, 27.2, 25.1, 13.9.

**HRMS** (FTMS+c ESI) *m/z*: [M + Na]<sup>+</sup> calcd for [C<sub>16</sub>H<sub>19</sub>NO<sub>5</sub>S+Na<sup>+</sup>]: 360.0876, found 360.0860.

**IR** (film): ν (cm<sup>-1</sup>) 3275, 2940, 2866, 1735, 1712, 1451, 1363, 1303, 1244, 1172, 1134, 1025, 857, 760, 566.

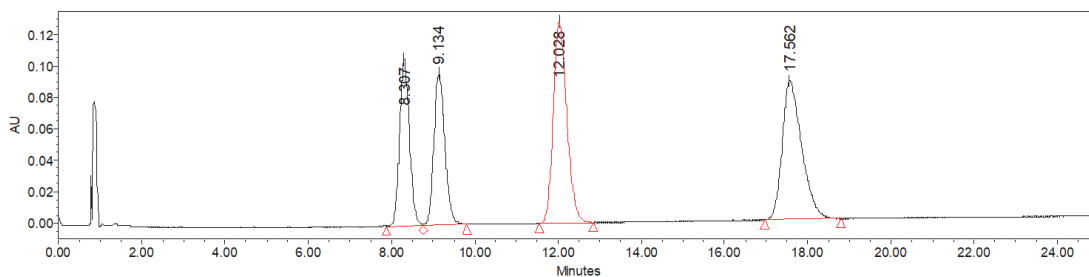

| Name | Retention Time | Area    | % Area |
|------|----------------|---------|--------|
| 1    | 8.307          | 1753188 | 18.86  |
| 2    | 9.134          | 1765302 | 18.99  |
| 3    | 12.028         | 2895441 | 31.15  |
| 4    | 17.562         | 2881460 | 31.00  |

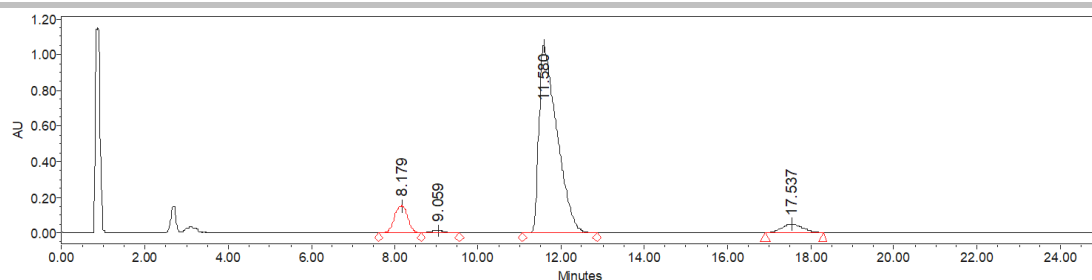

| Name | Retention Time | Area     | % Area |
|------|----------------|----------|--------|
| 1    | 8.179          | 3447856  | 9.33   |
| 2    | 9.059          | 372409   | 1.01   |
| 3    | 11.580         | 31474293 | 85.16  |
| 4    | 17.537         | 1663054  | 4.50   |

Isopropyl (*R*)-3-((*S*)-2-oxocyclohexyl)-2,3-dihydrobenzo[*d*]isothiazole-3-carboxylate 1,1-dioxide **4da**

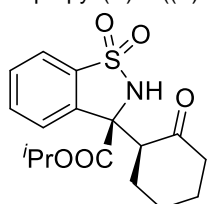

**Result:** white solid, 98% yield, 88% ee, 86:14 dr; SFC (Daicel chiralcel IC-3, CO<sub>2</sub>/MeOH = 90/10, flow rate = 1.5 mL/min, λ = 254 nm), *t*<sub>1</sub> = 7.97 min, *t*<sub>2</sub> = 9.43 min, *t*<sub>3</sub> = 11.35 min, *t*<sub>4</sub> = 12.21 min.

<sup>1</sup>H NMR (400 MHz, Chloroform-*d*) δ 7.80 – 7.74 (m, 1H), 7.76 – 7.56 (m, 2H), 7.56 – 7.50 (m, 1H), 5.98 (s, 1H), 5.12 (m, 1H), 3.12 (dd, *J* = 13.2, 5.6 Hz, 1H), 2.50 – 2.41 (m, 1H), 2.41 – 2.30 (m, 1H), 2.21 – 1.97 (m, 3H), 1.97 – 1.88 (m, 1H), 1.75 – 1.50 (m, 2H), 1.31 (d, *J* = 6.4 Hz, 3H), 1.26 (d, *J* = 6.4 Hz, 3H).

<sup>13</sup>C NMR (100 MHz, Chloroform-*d*) δ 208.4, 168.5, 136.7, 136.5, 132.4, 130.3, 125.8, 121.5, 71.5, 67.6, 59.2, 42.2, 30.8, 27.3, 25.1, 21.5.

**HRMS** (FTMS+c ESI) *m/z*: [M + Na]<sup>+</sup> calcd for [C<sub>17</sub>H<sub>21</sub>NO<sub>5</sub>S+Na<sup>+</sup>]: 374.1033, found 374.1031.

**IR** (film): ν (cm<sup>-1</sup>) 3278, 2939, 2866, 1732, 1583, 1452, 1305, 1249, 1173, 1135, 1102, 1049, 882, 761, 735, 566.

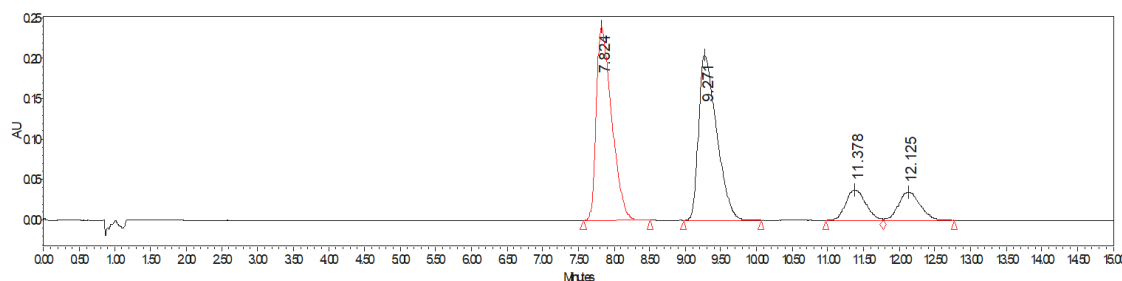

| Name | Retention Time | Area    | % Area |
|------|----------------|---------|--------|
| 1    | 7.824          | 3584503 | 41.34  |
| 2    | 9.271          | 3603920 | 41.56  |
| 3    | 11.378         | 739379  | 8.53   |
| 4    | 12.125         | 742831  | 8.57   |

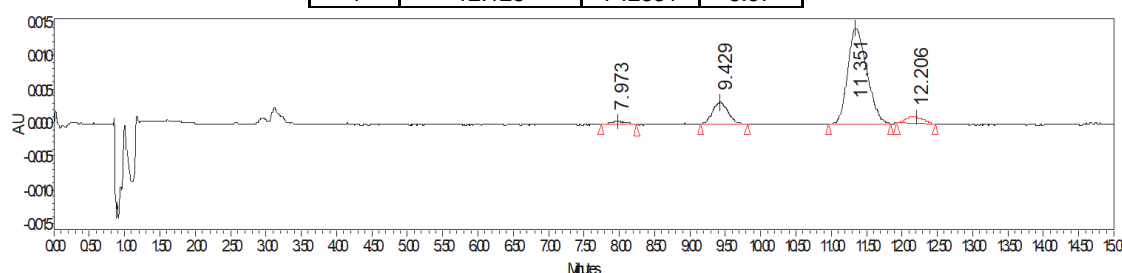

| Name | Retention Time | Area   | % Area |
|------|----------------|--------|--------|
| 1    | 7.973          | 6951   | 2.01   |
| 2    | 9.429          | 51595  | 14.94  |
| 3    | 11.351         | 269348 | 77.99  |
| 4    | 12.206         | 17484  | 5.06   |

Benzyl (*R*)-3-((*S*)-2-oxocyclohexyl)-2,3-dihydrobenzo[*d*]isothiazole-3-carboxylate 1,1-dioxide **4ea**

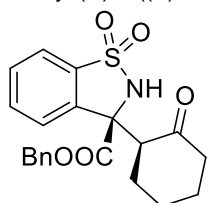

**Result:** Colorless oil, 97% yield, 92% ee, 88:12 dr; SFC (Daicel chiralcel IC-3, CO<sub>2</sub>/MeOH = 80/20, flow rate = 1.5 mL/min, λ = 254 nm), *t*<sub>1</sub> = 6.78 min, *t*<sub>2</sub> = 7.84 min, *t*<sub>3</sub> = 9.16 min, *t*<sub>4</sub> = 9.79 min.

**<sup>1</sup>H NMR** (600 MHz, Chloroform-*d*) δ 7.80 – 7.76 (m, 1H), 7.63 – 7.52 (m, 2H), 7.47 – 7.43 (m, 1H), 7.38 – 7.28 (m, 5H), 5.99 (s, 1H), 5.24 (d, *J* = 3.6 Hz, 2H), 3.14 (dd, *J* = 13.8, 5.4 Hz, 1H), 2.49 – 2.42 (m, 1H), 2.38 – 2.30 (m, 1H), 2.10 – 2.02 (m, 2H), 2.01 – 1.94 (m, 1H), 1.89 – 1.83 (m, 1H), 1.65 – 1.49 (m, 2H).

**<sup>13</sup>C NMR** (150 MHz, Chloroform-*d*) δ 208.7, 169.3, 136.6, 136.0, 134.3, 132.4, 130.3, 128.7, 128.6, 126.0, 121.5, 68.8, 67.6, 59.3, 42.2, 30.6, 27.1, 25.0.

**HRMS** (FTMS+c ESI) *m/z*: [M + Na]<sup>+</sup> calcd for [C<sub>21</sub>H<sub>21</sub>NO<sub>5</sub>S+Na<sup>+</sup>]: 422.1033, found 422.1046.

**IR** (film): ν (cm<sup>-1</sup>) 3277, 2946, 2866, 1739, 1710, 1452, 1360, 1304, 1227, 1172, 1134, 892, 758, 736, 699, 581.

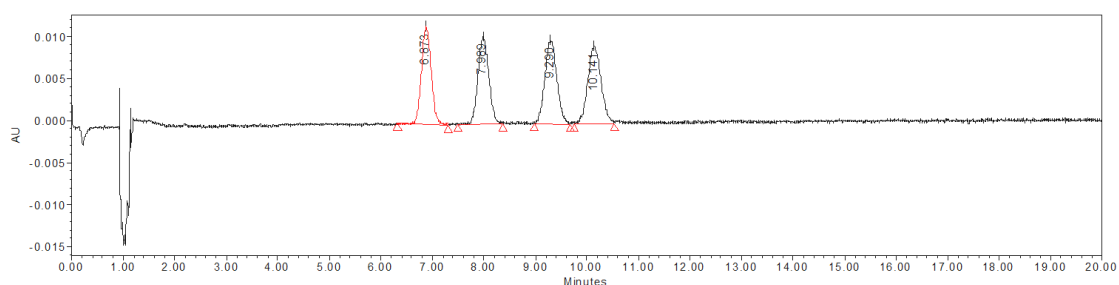

| Name | Retention Time | Area   | % Area |
|------|----------------|--------|--------|
| 1    | 6.873          | 155695 | 24.48  |
| 2    | 7.989          | 154614 | 24.31  |
| 3    | 9.290          | 162463 | 25.54  |
| 4    | 10.141         | 163218 | 25.66  |

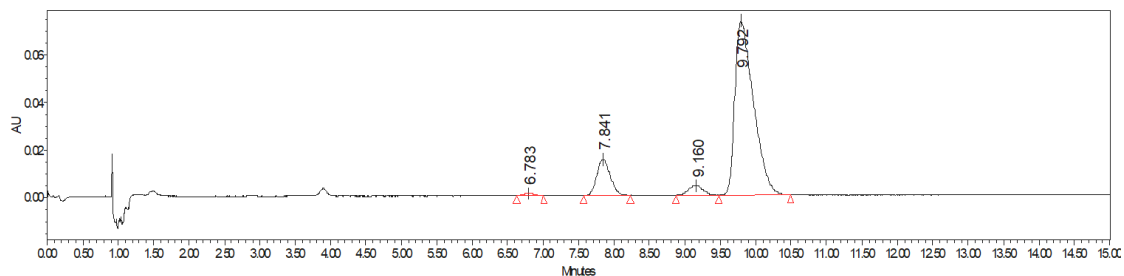

| Name | Retention Time | Area    | % Area |
|------|----------------|---------|--------|
| 1    | 6.783          | 12646   | 0.79   |
| 2    | 7.841          | 199195  | 12.46  |
| 3    | 9.160          | 58639   | 3.67   |
| 4    | 9.792          | 1328515 | 83.08  |

Methyl (*R*)-5-methyl-3-((*S*)-2-oxocyclohexyl)-2,3-dihydrobenzo[*d*]isothiazole-3-carboxylate 1,1-dioxide **4fa**

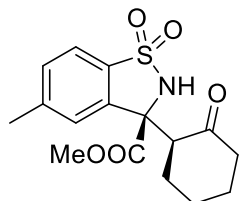

**Result:** white solid, 98% yield, 94% ee, 89:11 dr; SFC (Daicel chiralcel IC-3, CO<sub>2</sub>/MeOH = 80/20, flow rate = 1.5 mL/min, λ = 254 nm), *t*<sub>1</sub> = 5.35 min, *t*<sub>2</sub> = 6.23 min, *t*<sub>3</sub> = 7.47 min, *t*<sub>4</sub> = 8.72 min.

**<sup>1</sup>H NMR** (600 MHz, Chloroform-*d*) δ 7.65 (d, *J* = 7.8 Hz, 1H), 7.38 (d, *J* = 7.8 Hz, 1H), 7.30 (d, *J* = 23.4 Hz, 1H), 5.91 (s, 1H), 3.82 (s, 3H), 3.12 (dd, *J* = 12.6, 5.4 Hz, 1H), 2.45 (s, 3H), 2.48 – 2.43 (m, 1H), 2.40 – 2.32 (m, 1H), 2.17 – 2.04 (m, 3H), 1.97 – 1.91 (m, 1H), 1.73 – 1.54 (m, 2H).

<sup>13</sup>C NMR (150 MHz, Chloroform-*d*) δ 209.1, 170.0, 143.6, 136.3, 133.8, 131.3, 126.2, 121.3, 67.4, 59.7, 53.6, 42.3, 30.6, 27.2, 25.1, 21.9.

HRMS (FTMS+c ESI) *m/z*: [M + H]<sup>+</sup> calcd for [C<sub>16</sub>H<sub>19</sub>NO<sub>5</sub>S+H<sup>+</sup>]: 338.1056, found 338.1058.

IR (film): ν (cm<sup>-1</sup>) 3279, 2953, 2866, 1739, 1710, 1599, 1451, 1301, 1249, 1187, 1144, 1046, 900, 820, 736, 666, 566.

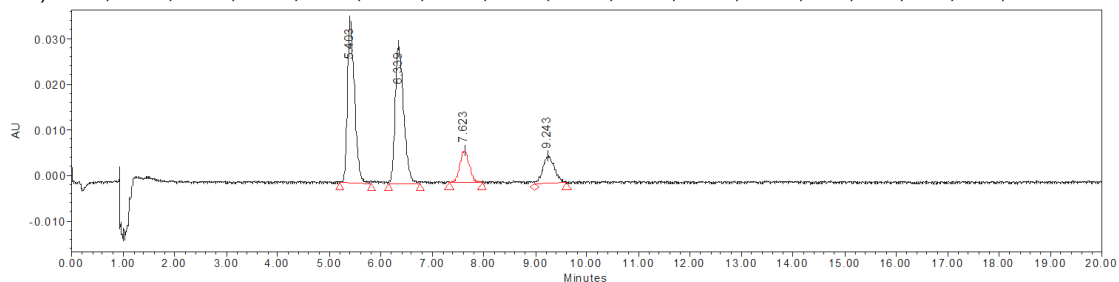

| Name | Retention Time | Area   | % Area |
|------|----------------|--------|--------|
| 1    | 5.403          | 344024 | 39.54  |
| 2    | 6.339          | 345230 | 39.68  |
| 3    | 7.623          | 89889  | 10.33  |
| 4    | 9.243          | 90899  | 10.45  |

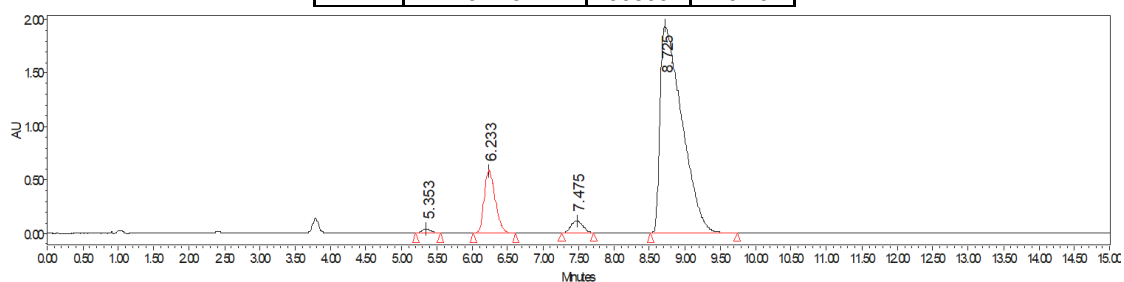

| Name | Retention Time | Area     | % Area |
|------|----------------|----------|--------|
| 1    | 5.353          | 384987   | 0.77   |
| 2    | 6.233          | 6373805  | 12.82  |
| 3    | 7.475          | 1358429  | 2.73   |
| 4    | 8.725          | 41611805 | 83.68  |

Methyl (*R*)-5-(*tert*-butyl)-3-((*S*)-2-oxocyclohexyl)-2,3-dihydrobenzo[*d*]isothiazole-3-carboxylate 1,1-dioxide **4ga**

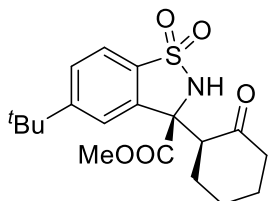

**Result:** white solid, 98% yield, 92% ee, 85:15 dr; SFC (Daicel chiralcel OX-3, CO<sub>2</sub>/EtOH = 90/10, flow rate = 1.5 mL/min, λ = 230 nm), *t*<sub>1</sub> = 12.05 min, *t*<sub>2</sub> = 13.70 min, *t*<sub>3</sub> = 19.28 min, *t*<sub>4</sub> = 20.97 min.

<sup>1</sup>H NMR (600 MHz, Chloroform-*d*) δ 7.70 (d, *J* = 8.4 Hz, 1H), 7.61 (dd, *J* = 8.4, 1.8 Hz, 1H), 7.47 (d, *J* = 1.2 Hz, 1H), 5.97 (s, 1H), 3.82 (s, 3H), 3.09 (dd, *J* = 13.2, 5.4 Hz, 1H), 2.49 – 2.43 (m, 1H), 2.41 – 2.33 (m, 1H), 2.22 – 2.13 (m, 1H), 2.13 – 2.01 (m, 2H), 1.96 – 1.90 (m, 1H), 1.72 – 1.53 (m, 2H), 1.32 (s, 9H).

<sup>13</sup>C NMR (150 MHz, Chloroform-*d*) δ 209.2, 170.1, 156.8, 135.9, 133.7, 127.9, 122.7, 121.1, 67.4, 59.9, 53.6, 42.3, 35.4, 31.1, 30.7, 27.2, 25.2.

HRMS (FTMS+c ESI) *m/z*: [M + Na]<sup>+</sup> calcd for [C<sub>19</sub>H<sub>25</sub>NO<sub>5</sub>S+Na<sup>+</sup>]: 402.1346, found 402.1351.

IR (film): ν (cm<sup>-1</sup>) 3282, 2958, 2869, 1740, 1711, 1596, 1302, 1249, 1194, 1150, 1108, 835, 736, 626, 572.

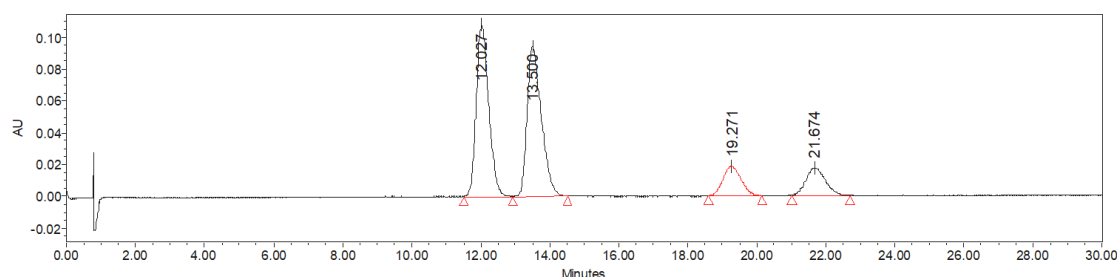

| Name | Retention Time | Area | % Area |
|------|----------------|------|--------|
| 1    | 12.027         |      |        |
| 2    | 13.500         |      |        |
| 3    | 19.271         |      |        |
| 4    | 21.674         |      |        |

|   |        |         |       |
|---|--------|---------|-------|
| 1 | 12.027 | 2702111 | 39.97 |
| 2 | 13.500 | 2702176 | 39.97 |
| 3 | 19.271 | 679441  | 10.05 |
| 4 | 21.674 | 676660  | 10.01 |

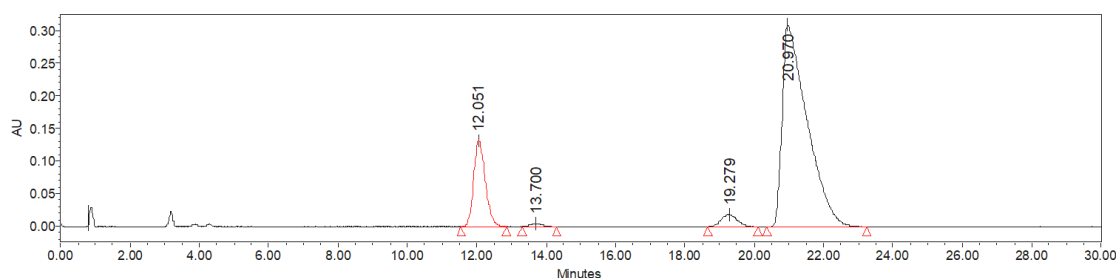

| Name | Retention Time | Area     | % Area |
|------|----------------|----------|--------|
| 1    | 12.051         | 3106436  | 16.00  |
| 2    | 13.700         | 147023   | 0.76   |
| 3    | 19.279         | 644543   | 3.32   |
| 4    | 20.970         | 15516079 | 79.92  |

Methyl (*R*)-5-fluoro-3-((*S*)-2-oxocyclohexyl)-2,3-dihydrobenzo[*d*]isothiazole-3-carboxylate 1,1-dioxide **4ha**

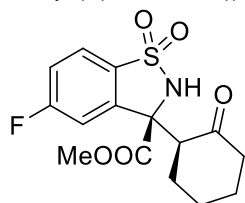

**Result:** white solid, 98% yield, 91% ee, 91:9 dr; SFC (Daicel chiralcel IC-3, CO<sub>2</sub>/MeOH = 90/10, flow rate = 1.5 mL/min, λ = 230 nm), *t*<sub>1</sub> = 5.76 min, *t*<sub>2</sub> = 6.99 min, *t*<sub>3</sub> = 8.66 min, *t*<sub>4</sub> = 10.67 min.

**<sup>1</sup>H NMR** (400 MHz, Chloroform-*d*) δ 7.77 (dd, *J* = 8.4, 4.8 Hz, 1H), 7.33 – 7.18 (m, 2H), 6.02 (s, 1H), 3.83 (s, 3H), 3.18 (dd, *J* = 13.2, 5.6 Hz, 1H), 2.50 – 2.41 (m, 1H), 2.41 – 2.30 (m, 1H), 2.15 – 1.89 (m, 4H), 1.73 – 1.56 (m, 2H).

**<sup>13</sup>C NMR** (101 MHz, Chloroform-*d*) δ 208.7, 169.6, 164.8 (d, *J* = 253.6 Hz), 139.2 (d, *J* = 9.3 Hz), 132.4 (d, *J* = 2.6 Hz), 123.7 (d, *J* = 10.0 Hz), 118.3 (d, *J* = 23.9 Hz), 113.4 (d, *J* = 25.3 Hz), 67.3, 59.2, 53.9, 42.2, 30.2, 27.0, 24.9.

**<sup>19</sup>F NMR** (376 MHz, Chloroform-*d*) δ -103.9.

**HRMS** (FTMS+c ESI) *m/z*: [M + Na]<sup>+</sup> calcd for [C<sub>15</sub>H<sub>16</sub>FNO<sub>5</sub>S+Na<sup>+</sup>]: 364.0625, found 364.0615.

**IR** (film): ν (cm<sup>-1</sup>) 3270, 2954, 2867, 1744, 1710, 1591, 1475, 1306, 1253, 1179, 1127, 1046, 831, 737, 570.

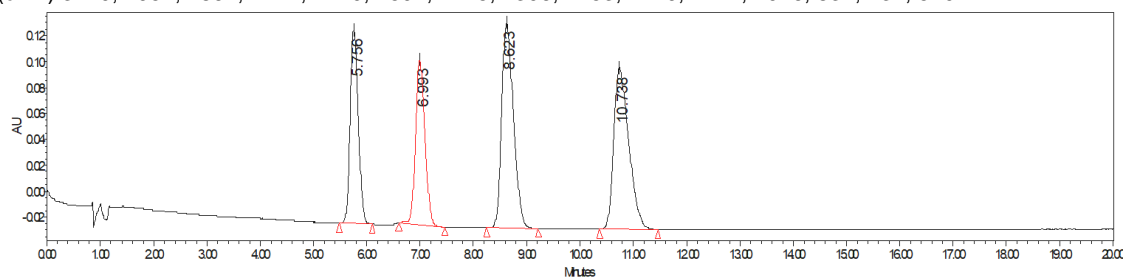

| Name | Retention Time | Area    | % Area |
|------|----------------|---------|--------|
| 1    | 5.756          | 1561533 | 19.61  |
| 2    | 6.993          | 1552411 | 19.49  |
| 3    | 8.623          | 2423769 | 30.43  |
| 4    | 10.738         | 2426155 | 30.46  |

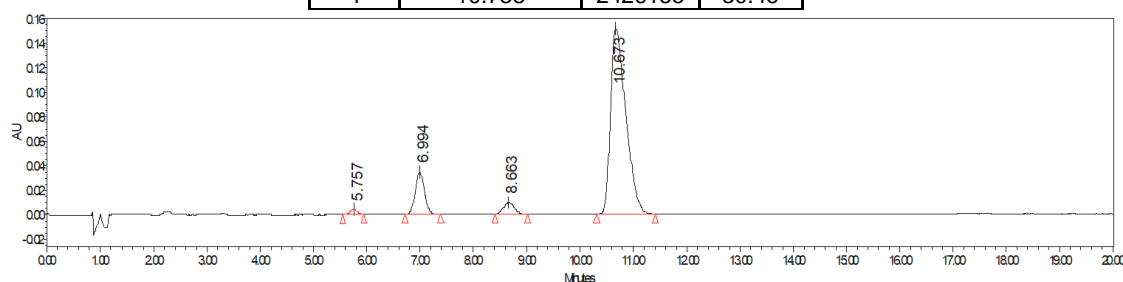

| Name | Retention Time | Area | % Area |
|------|----------------|------|--------|
| 1    | 5.757          |      |        |
| 2    | 6.994          |      |        |
| 3    | 8.663          |      |        |
| 4    | 10.673         |      |        |

|   |        |         |       |
|---|--------|---------|-------|
| 1 | 5.757  | 44898   | 1.24  |
| 2 | 6.994  | 425355  | 11.73 |
| 3 | 8.663  | 141205  | 3.89  |
| 4 | 10.673 | 3013917 | 83.13 |

Methyl (*R*)-5-chloro-3-((*S*)-2-oxocyclohexyl)-2,3-dihydrobenzo[d]isothiazole-3-carboxylate 1,1-dioxide **4ia**

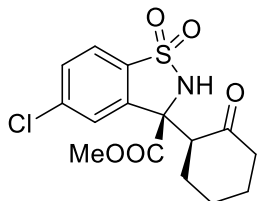

**Result:** white solid, 98% yield, 90% ee, 88:12 dr; SFC (Daicel chiralcel IC-3, CO<sub>2</sub>/MeOH = 90/10, flow rate = 1.5 mL/min, λ = 230 nm), t<sub>1</sub> = 8.18 min, t<sub>2</sub> = 10.66 min, t<sub>3</sub> = 12.62 min, t<sub>4</sub> = 14.28 min.

**<sup>1</sup>H NMR** (600 MHz, Chloroform-*d*) δ 7.71 (d, *J* = 8.4 Hz, 1H), 7.55 (dd, *J* = 8.4, 1.8 Hz, 1H), 7.50 (d, *J* = 1.2 Hz, 1H), 5.99 (s, 1H), 3.84 (s, 3H), 3.16 (dd, *J* = 11.4, 7.2 Hz, 1H), 2.49 – 2.42 (m, 1H), 2.40 – 2.32 (m, 1H), 2.14 – 2.00 (m, 3H), 1.98 – 1.92 (m, 1H), 1.77 – 1.56 (m, 2H).

**<sup>13</sup>C NMR** (150 MHz, Chloroform-*d*) δ 208.6, 169.5, 139.2, 138.1, 134.9, 130.8, 126.1, 122.7, 67.4, 59.2, 53.9, 42.2, 30.4, 27.1, 25.0.

**HRMS** (FTMS+c ESI) *m/z*: [M + H]<sup>+</sup> calcd for [C<sub>15</sub>H<sub>16</sub>Cl<sup>34.9689</sup>NO<sub>5</sub>S+H<sup>+</sup>]: 358.0510, found 358.0514.

**HRMS** (FTMS+c ESI) *m/z*: [M + H]<sup>+</sup> calcd for [C<sub>15</sub>H<sub>16</sub>Cl<sup>36.9659</sup>NO<sub>5</sub>S+H<sup>+</sup>]: 360.0481, found 360.0474.

**IR** (film): ν (cm<sup>-1</sup>) 3271, 2953, 1743, 1710, 1590, 1451, 1307, 1264, 1173, 1139, 1088, 890, 825, 736, 615, 565.

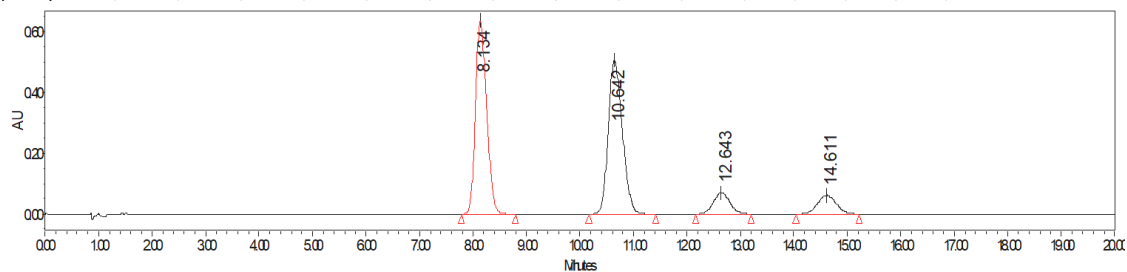

| Name | Retention Time | Area    | % Area |
|------|----------------|---------|--------|
| 1    | 8.134          | 9198199 | 42.96  |
| 2    | 10.642         | 9228550 | 43.10  |
| 3    | 12.643         | 1493652 | 6.98   |
| 4    | 14.611         | 1492171 | 6.97   |

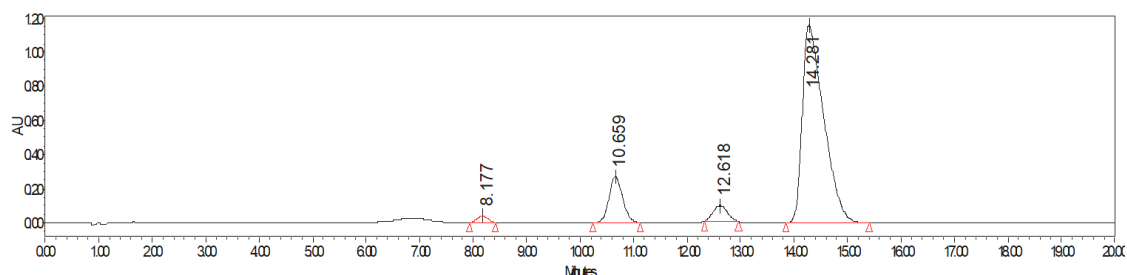

| Name | Retention Time | Area     | % Area |
|------|----------------|----------|--------|
| 1    | 8.177          | 532362   | 1.36   |
| 2    | 10.659         | 4732005  | 12.09  |
| 3    | 12.618         | 1722636  | 4.40   |
| 4    | 14.281         | 32141288 | 82.14  |

Methyl (*R*)-3-((*S*)-2-oxocyclohexyl)-5-(trifluoromethyl)-2,3-dihydrobenzo[d]isothiazole-3-carboxylate 1,1-dioxide **4ja**

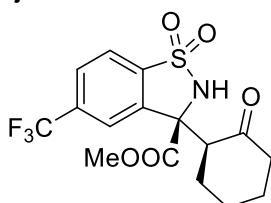

**Result:** white solid, 98% yield, 86% ee, 90:10 dr; SFC (Lux 5u Cellulose-1, CO<sub>2</sub>/EtOH = 95/5, flow rate = 0.8 mL/min, λ = 230 nm), t<sub>1</sub> = 10.35 min, t<sub>2</sub> = 11.39 min, t<sub>3</sub> = 19.11 min, t<sub>4</sub> = 26.13 min.

**<sup>1</sup>H NMR** (600 MHz, Chloroform-*d*) δ 7.92 (d, *J* = 8.4 Hz, 1H), 7.85 (d, *J* = 8.4 Hz, 1H), 7.78 (s, 1H), 6.08 (s, 1H), 3.85 (s, 3H), 3.19 (dd, *J* = 12.6, 5.4 Hz, 1H), 2.52 – 2.43 (m, 1H), 2.42 – 2.33 (m, 1H), 2.15 – 1.92 (m, 4H), 1.78 – 1.56 (m, 2H).

**<sup>13</sup>C NMR** (150 MHz, Chloroform-*d*) δ 208.5, 169.4, 139.7, 137.2, 134.8 (q, *J* = 33.0 Hz), 127.7 (q, *J* = 3.3 Hz), 123.2 (q, *J* = 3.6 Hz), 122.9 (q, *J* = 271.9 Hz), 122.5, 67.7, 59.1, 54.1, 42.2, 30.4, 27.0, 25.0.

**<sup>19</sup>F NMR** (376 MHz, Chloroform-*d*) δ -62.6.

**HRMS** (FTMS+c ESI) *m/z*: [M + H]<sup>+</sup> calcd for [C<sub>16</sub>H<sub>16</sub>F<sub>3</sub>NO<sub>5</sub>S+H<sup>+</sup>]: 392.0774, found 392.0779.

**IR** (film): ν (cm<sup>-1</sup>) 3274, 2955, 2868, 1745, 1712, 1423, 1329, 1253, 1172, 1135, 1080, 895, 835, 737, 717, 561.

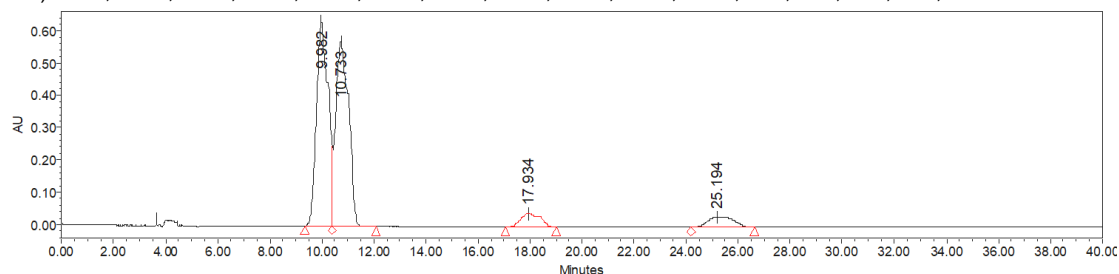

| Name | Retention Time | Area     | % Area |
|------|----------------|----------|--------|
| 1    | 9.982          | 19662423 | 44.83  |
| 2    | 10.733         | 19785727 | 45.11  |
| 3    | 17.934         | 2196231  | 5.01   |
| 4    | 25.194         | 2213040  | 5.05   |

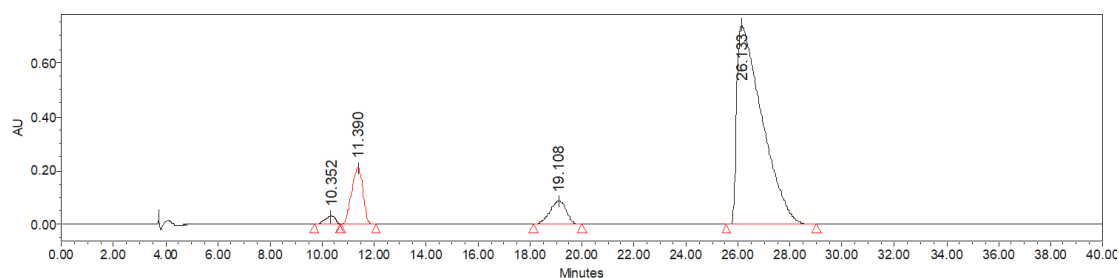

| Name | Retention Time | Area     | % Area |
|------|----------------|----------|--------|
| 1    | 10.352         | 843476   | 1.39   |
| 2    | 11.390         | 6380996  | 10.55  |
| 3    | 19.108         | 3760258  | 6.22   |
| 4    | 26.133         | 49498776 | 81.84  |

Methyl (*R*)-6-methyl-3-((*S*)-2-oxocyclohexyl)-2,3-dihydrobenzo[*d*]isothiazole-3-carboxylate 1,1-dioxide **4ka**

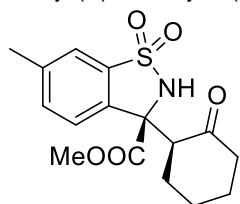

**Result:** white solid, 99% yield, 94% ee, 88:12 dr; SFC (Lux 5u Cellulose-1, CO<sub>2</sub>/PrOH = 90/10, flow rate = 0.8 mL/min, λ = 230 nm), t<sub>1</sub> = 19.79 min, t<sub>2</sub> = 20.97 min, t<sub>3</sub> = 28.53 min, t<sub>4</sub> = 37.87 min.

**<sup>1</sup>H NMR** (600 MHz, Chloroform-*d*) δ 7.57 (s, 1H), 7.39 (s, 2H), 5.93 (s, 1H), 3.80 (s, 3H), 3.11 (dd, *J* = 12.6, 6.0 Hz, 1H), 2.44 (s, 3H), 2.47 – 2.41 (m, 1H), 2.39 – 2.31 (m, 1H), 2.14 – 2.04 (m, 3H), 1.95 – 1.88 (m, 1H), 1.76 – 1.52 (m, 2H).

**<sup>13</sup>C NMR** (150 MHz, Chloroform-*d*) δ 209.1, 170.1, 141.2, 136.5, 133.6, 133.1, 125.8, 121.5, 67.3, 59.7, 53.6, 42.2, 30.6, 27.1, 25.0, 21.1.

**HRMS** (FTMS+c ESI) *m/z*: [M + Na]<sup>+</sup> calcd for [C<sub>16</sub>H<sub>19</sub>NO<sub>5</sub>S+Na<sup>+</sup>]: 360.0876, found 360.0860.

**IR** (film): ν (cm<sup>-1</sup>) 3280, 2953, 2866, 1740, 1710, 1490, 1451, 1301, 1251, 1161, 1049, 897, 837, 736, 570.

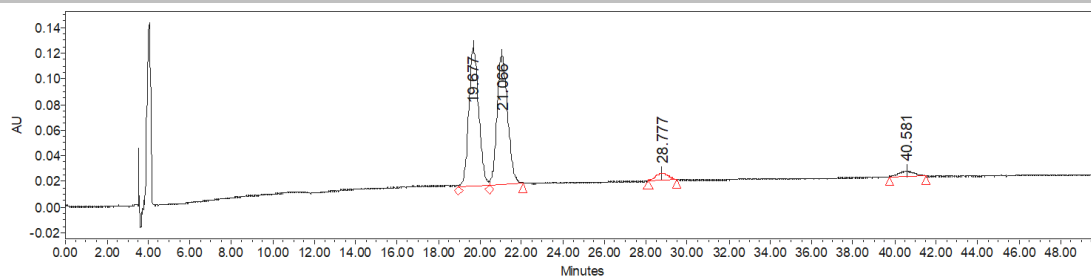

| Name | Retention Time | Area    | % Area |
|------|----------------|---------|--------|
| 1    | 19.677         | 3586177 | 47.17  |
| 2    | 21.066         | 3583042 | 47.13  |
| 3    | 28.777         | 218093  | 2.87   |
| 4    | 40.581         | 214711  | 2.82   |

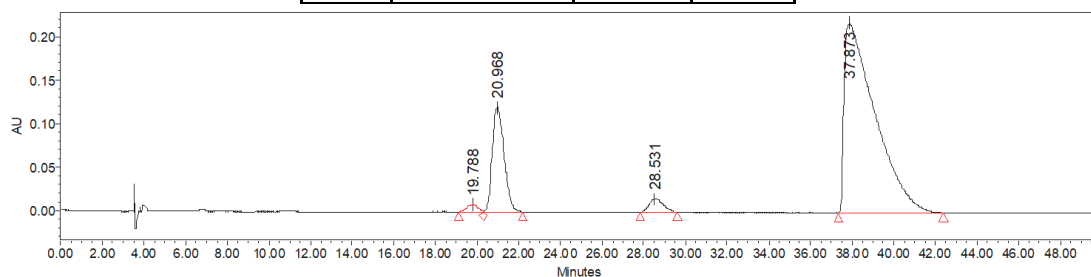

| Name | Retention Time | Area     | % Area |
|------|----------------|----------|--------|
| 1    | 19.788         | 298585   | 1.06   |
| 2    | 20.968         | 4682811  | 16.63  |
| 3    | 28.531         | 711874   | 2.53   |
| 4    | 37.873         | 22469147 | 79.78  |

Methyl (*R*)-7-fluoro-3-((*S*)-2-oxocyclohexyl)-2,3-dihydrobenzo[*d*]isothiazole-3-carboxylate 1,1-dioxide **41a**

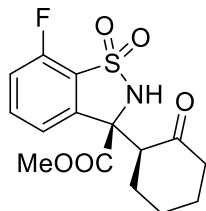

**Result:** white solid, 98% yield, 90% ee, 95:5 dr; SFC (Daicel chiralcel IC-3, CO<sub>2</sub>/MeOH = 80/20, flow rate = 1.5 mL/min, λ = 230 nm), t<sub>1</sub> = 4.26 min, t<sub>2</sub> = 4.86 min, t<sub>3</sub> = 6.55 min, t<sub>4</sub> = 6.87 min.

<sup>1</sup>H NMR (400 MHz, Chloroform-*d*) δ 7.59 (td, *J* = 8.0, 5.2 Hz, 1H), 7.31 (d, *J* = 7.6 Hz, 1H), 7.22 (t, *J* = 8.4 Hz, 1H), 6.09 (s, 1H), 3.83 (s, 3H), 3.16 (dd, *J* = 11.6, 6.8 Hz, 1H), 2.49 – 2.30 (m, 2H), 2.14 – 1.97 (m, 3H), 1.97 – 1.88 (m, 1H), 1.74 – 1.53 (m, 2H).

<sup>13</sup>C NMR (100 MHz, Chloroform-*d*) δ 208.6, 169.5, 156.1 (d, *J* = 257.3 Hz), 139.2 (d, *J* = 0.9 Hz), 135.1 (d, *J* = 7.0 Hz), 124.5 (d, *J* = 19.9 Hz), 121.7 (d, *J* = 4.0 Hz), 117.3 (d, *J* = 18.3 Hz), 67.7, 59.2, 53.9, 42.2, 30.5, 27.1, 25.0.

<sup>19</sup>F NMR (376 MHz, Chloroform-*d*) δ -114.6.

**HRMS** (FTMS+c ESI) *m/z*: [M + H]<sup>+</sup> calcd for [C<sub>15</sub>H<sub>16</sub>FNO<sub>5</sub>S+H<sup>+</sup>]: 342.0806, found 342.0818.

**IR** (film): ν (cm<sup>-1</sup>) 3274, 2954, 1742, 1712, 1592, 1473, 1314, 1260, 1179, 1111, 909, 808, 769, 736, 590.

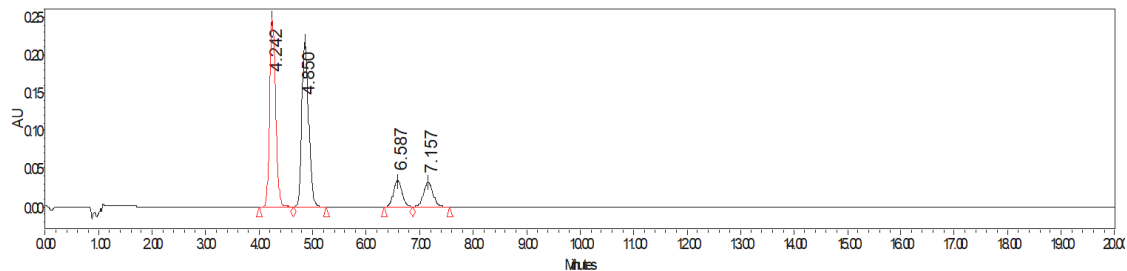

| Name | Retention Time | Area    | % Area |
|------|----------------|---------|--------|
| 1    | 4.242          | 1930230 | 41.44  |
| 2    | 4.850          | 1927503 | 41.38  |
| 3    | 6.587          | 396326  | 8.51   |
| 4    | 7.157          | 404068  | 8.67   |



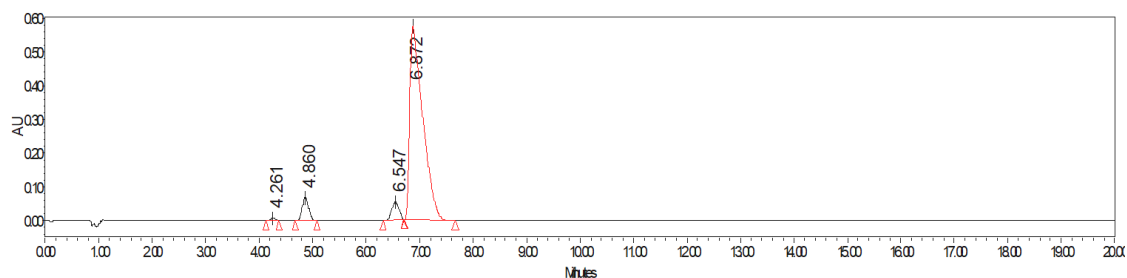

| Name | Retention Time | Area    | % Area |
|------|----------------|---------|--------|
| 1    | 4.261          | 52940   | 0.49   |
| 2    | 4.860          | 581300  | 5.43   |
| 3    | 6.547          | 505175  | 4.72   |
| 4    | 6.872          | 9561852 | 89.35  |

Methyl (*R*)-7-chloro-3-((*S*)-2-oxocyclohexyl)-2,3-dihydrobenzo[*d*]isothiazole-3-carboxylate 1,1-dioxide **4ma**

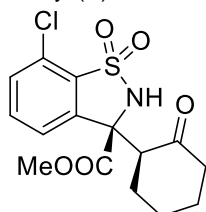

**Result:** white solid, 97% yield, 90% ee, 91:9 dr; SFC (Daicel chiralcel OX-3, CO<sub>2</sub>/EtOH = 80/20, flow rate = 1.5 mL/min, λ = 230 nm), t<sub>1</sub> = 5.14 min, t<sub>2</sub> = 6.32 min, t<sub>3</sub> = 9.89 min, t<sub>4</sub> = 10.65 min.

<sup>1</sup>H NMR (400 MHz, Chloroform-*d*) δ 7.57 – 7.48 (m, 2H), 7.43 (dd, *J* = 7.2, 1.6 Hz, 1H), 6.05 (s, 1H), 3.83 (s, 3H), 3.13 (dd, *J* = 12.8, 6.0 Hz, 1H), 2.49 – 2.41 (m, 1H), 2.40 – 2.31 (m, 1H), 2.15 – 1.97 (m, 3H), 1.96 – 1.88 (m, 1H), 1.73 – 1.52 (m, 2H).

<sup>13</sup>C NMR (100 MHz, Chloroform-*d*) δ 208.7, 169.5, 138.7, 134.4, 133.7, 131.2, 129.1, 124.3, 66.6, 59.4, 42.2, 30.6, 27.1, 25.0.

**HRMS** (FTMS+c ESI) *m/z*: [M + H]<sup>+</sup> calcd for [C<sub>15</sub>H<sub>16</sub>Cl]<sup>34.9689</sup>NO<sub>5</sub>S+H<sup>+</sup>]: 358.0510, found 358.0514.

**HRMS** (FTMS+c ESI) *m/z*: [M + H]<sup>+</sup> calcd for [C<sub>15</sub>H<sub>16</sub>Cl]<sup>36.9659</sup>NO<sub>5</sub>S+H<sup>+</sup>]: 360.0481, found 360.0479.

**IR** (film): ν (cm<sup>-1</sup>) 3273, 2953, 2866, 1741, 1711, 1588, 1454, 1311, 1256, 1172, 879, 736, 579.

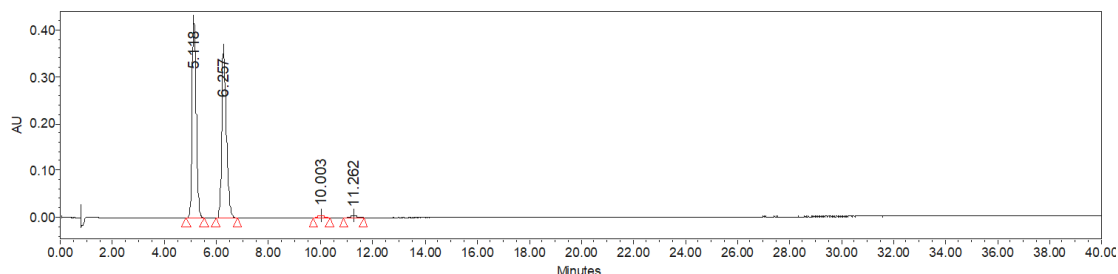

| Name | Retention Time | Area    | % Area |
|------|----------------|---------|--------|
| 1    | 5.118          | 4576090 | 49.07  |
| 2    | 6.257          | 4575973 | 49.06  |
| 3    | 10.003         | 89653   | 0.96   |
| 4    | 11.262         | 84828   | 0.91   |

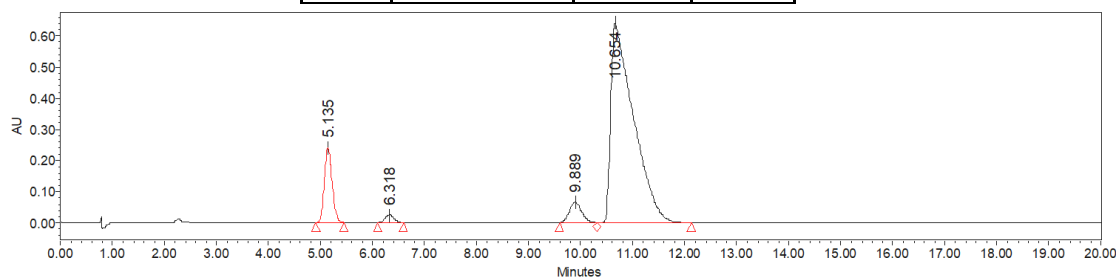

| Name | Retention Time | Area    | % Area |
|------|----------------|---------|--------|
| 1    | 5.135          | 2505623 | 10.84  |
| 2    | 6.318          | 278332  | 1.20   |
| 3    | 9.889          | 1053496 | 4.56   |

|   |        |          |       |
|---|--------|----------|-------|
| 4 | 10.654 | 19271344 | 83.39 |
|---|--------|----------|-------|

Methyl (*R*)-3-((*S*)-2-oxocyclohexyl)-7-(trifluoromethyl)-2,3-dihydrobenzo[*d*]isothiazole-3-carboxylate 1,1-dioxide **4na**

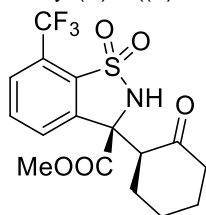

**Result:** white solid, 96% yield, 87% ee, 92:8 dr; SFC (Daicel chiralcel OX-3, CO<sub>2</sub>/MeOH = 90/10, flow rate = 1.5 mL/min, λ = 230 nm), *t*<sub>1</sub> = 6.27 min, *t*<sub>2</sub> = 7.13 min, *t*<sub>3</sub> = 10.55 min, *t*<sub>4</sub> = 12.19 min.

<sup>1</sup>H NMR (400 MHz, Chloroform-*d*) δ 7.87 – 7.79 (m, 1H), 7.78 – 7.70 (m, 2H), 6.15 (s, 1H), 3.85 (s, 3H), 3.19 (dd, *J* = 13.2, 5.2 Hz, 1H), 2.53 – 2.43 (m, 1H), 2.42 – 2.32 (m, 1H), 2.20 – 2.06 (m, 2H), 2.00 – 1.89 (m, 2H), 1.77 – 1.52 (m, 2H).

<sup>13</sup>C NMR (100 MHz, Chloroform-*d*) δ 208.6, 169.4, 138.8, 134.8, 132.8, 129.8, 128.1 (q, *J* = 4.6 Hz), 125.8 (q, *J* = 35.7 Hz), 122.2 (d, *J* = 272.6 Hz), 66.9, 59.1, 54.0, 42.2, 30.8, 27.2, 25.0.

<sup>19</sup>F NMR (376 MHz, Chloroform-*d*) δ -59.5.

**HRMS** (FTMS+c ESI) *m/z*: [M + Na]<sup>+</sup> calcd for [C<sub>16</sub>H<sub>16</sub>F<sub>3</sub>NO<sub>5</sub>S+Na<sup>+</sup>]: 414.0593, found 414.0585.

**IR** (film): ν (cm<sup>-1</sup>) 3273, 2955, 2867, 1743, 1713, 1438, 1377, 1324, 1260, 1177, 1142, 880, 737, 585, 527.

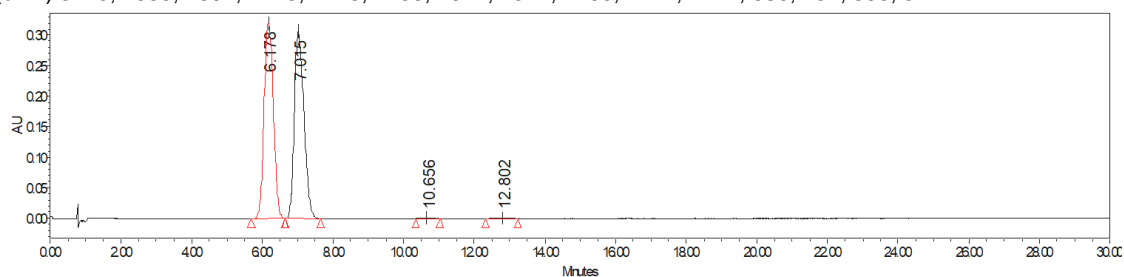

| Name | Retention Time | Area    | % Area |
|------|----------------|---------|--------|
| 1    | 6.178          | 5838818 | 49.76  |
| 2    | 7.015          | 5830271 | 49.69  |
| 3    | 10.656         | 31961   | 0.27   |
| 4    | 12.802         | 32441   | 0.28   |

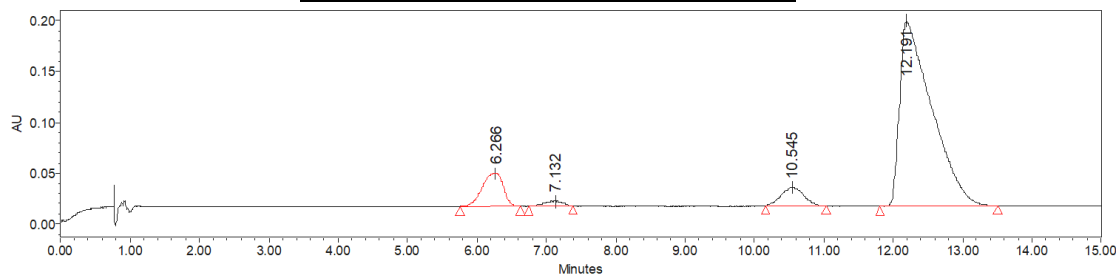

| Name | Retention Time | Area    | % Area |
|------|----------------|---------|--------|
| 1    | 6.266          | 681168  | 9.71   |
| 2    | 7.132          | 88868   | 1.27   |
| 3    | 10.545         | 405194  | 5.78   |
| 4    | 12.191         | 5838611 | 83.24  |

Methyl (*R*)-3-((*S*)-2-oxocyclohexyl)-2,3-dihydronaphtho[2,3-*d*]isothiazole-3-carboxylate 1,1-dioxide **4oa**

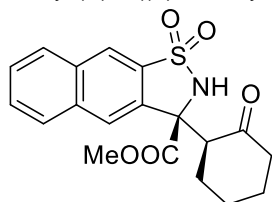

**Result:** white solid, 96% yield, 95% ee, 88:12 dr; SFC (Daicel chiralcel IC-3, CO<sub>2</sub>/MeOH = 80/20, flow rate = 1.5 mL/min, λ = 254 nm), *t*<sub>1</sub> = 8.77 min, *t*<sub>2</sub> = 9.64 min, *t*<sub>3</sub> = 14.78 min, *t*<sub>4</sub> = 16.73 min.

<sup>1</sup>H NMR (400 MHz, Chloroform-*d*) δ 8.40 (d, *J* = 8.4 Hz, 1H), 8.04 (d, *J* = 8.4 Hz, 1H), 7.96 (d, *J* = 8.0 Hz, 1H), 7.75 – 7.62 (m, 2H), 7.56 (d, *J* = 8.8 Hz, 1H), 6.12 (s, 1H), 3.84 (s, 3H), 3.23 (dd, *J* = 11.2, 7.6 Hz, 1H), 2.54 – 2.44 (m, 1H), 2.43 – 2.32 (m, 1H), 2.21 – 2.05 (m, 3H), 1.97 – 1.88 (m, 1H), 1.73 – 1.50 (m, 2H).

<sup>13</sup>C NMR (100 MHz, Chloroform-*d*) δ 209.0, 169.6, 135.2, 133.7, 133.5, 132.0, 129.2, 128.4, 128.3, 125.3, 123.0, 121.7, 67.6, 60.0, 53.7, 42.2, 30.7, 27.1, 25.0.

HRMS (FTMS+c ESI) *m/z*: [M + Na]<sup>+</sup> calcd for [C<sub>19</sub>H<sub>19</sub>NO<sub>5</sub>S+Na<sup>+</sup>]: 396.0876 found 396.0871.

IR (film): ν (cm<sup>-1</sup>) 3274, 3061, 2953, 2866, 1742, 1709, 1630, 1595, 1509, 1450, 1357, 1303, 1133, 1056, 975, 897, 869, 829, 765, 736, 702, 553.

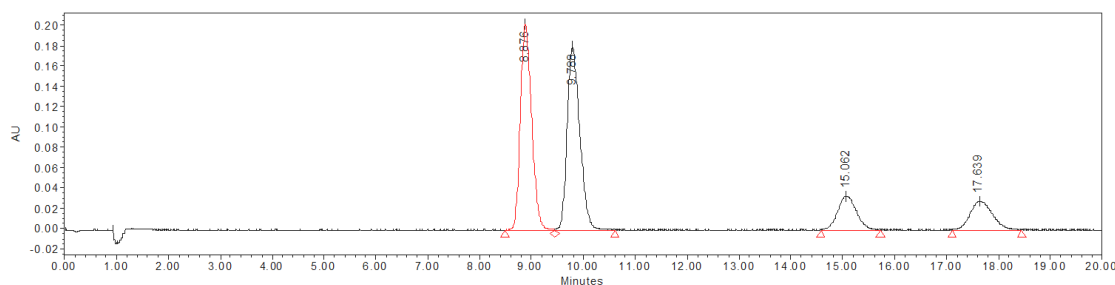

| Name | Retention Time | Area    | % Area |
|------|----------------|---------|--------|
| 1    | 8.876          | 3046795 | 39.23  |
| 2    | 9.788          | 3047838 | 39.25  |
| 3    | 15.062         | 828433  | 10.67  |
| 4    | 17.639         | 843019  | 10.86  |

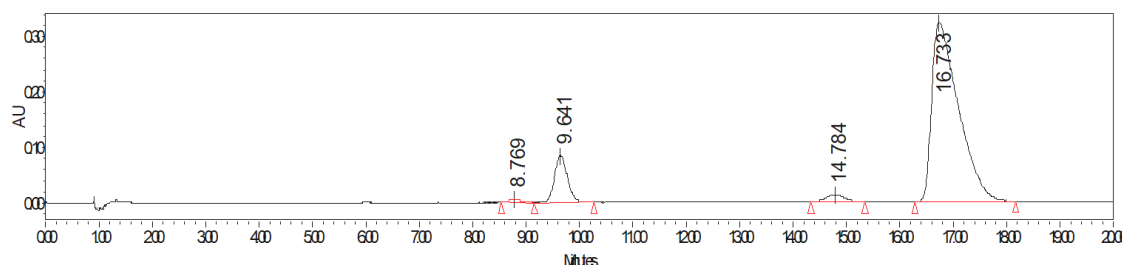

| Name | Retention Time | Area     | % Area |
|------|----------------|----------|--------|
| 1    | 8.769          | 74645    | 0.58   |
| 2    | 9.641          | 1377657  | 10.61  |
| 3    | 14.784         | 318208   | 2.45   |
| 4    | 16.733         | 11209410 | 86.36  |

Methyl (*R*)-5-methoxy-3-((*S*)-4-oxotetrahydro-2H-thiopyran-3-yl)-2,3-dihydrobenzo[*d*]isothiazole-3-carboxylate 1,1-dioxide **4ad**

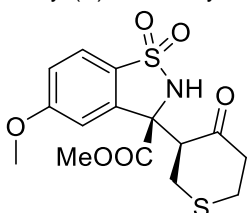

Result: colorless oil, 91% yield, 92% ee, 84:16 dr; SFC (Daicel chiralcel IC-3, CO<sub>2</sub>/MeOH = 80/20, flow rate = 1.5 mL/min, λ = 230 nm), *t*<sub>1</sub> = 5.65 min, *t*<sub>2</sub> = 6.56 min, *t*<sub>3</sub> = 8.87 min, *t*<sub>4</sub> = 9.89 min.

<sup>1</sup>H NMR (400 MHz, Chloroform-*d*) δ 7.72 (d, *J* = 8.8 Hz, 1H), 7.10 (dd, *J* = 8.8, 2.4 Hz, 1H), 6.93 (d, *J* = 2.4 Hz, 1H), 5.92 (s, 1H), 3.88 (s, 3H), 3.85 (s, 3H), 3.52 (dd, *J* = 12.0, 4.0 Hz, 1H), 3.41 (t, *J* = 12.8 Hz, 1H), 3.07 – 2.88 (m, 3H), 2.86 – 2.76 (m, 2H).

<sup>13</sup>C NMR (100 MHz, Chloroform-*d*) δ 206.7, 169.5, 163.1, 137.8, 128.7, 123.3, 116.4, 111.1, 67.0, 61.9, 56.1, 53.9, 45.1, 32.6, 30.4.

HRMS (FTMS+c ESI) *m/z*: [M + Na]<sup>+</sup> calcd for [C<sub>15</sub>H<sub>17</sub>NO<sub>6</sub>S<sub>2</sub>+Na<sup>+</sup>]: 394.0389 found 394.0386.

IR (film): ν (cm<sup>-1</sup>) 3271, 2955, 2842, 1740, 1710, 1595, 1484, 1435, 1287, 1246, 1183, 1135, 1019, 827, 736.

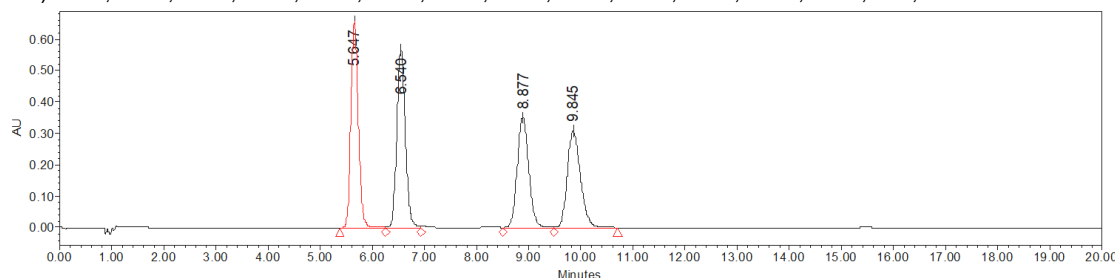

| Name | Retention Time | Area | % Area |
|------|----------------|------|--------|
|------|----------------|------|--------|

|   |       |         |       |
|---|-------|---------|-------|
| 1 | 5.647 | 6475799 | 27.29 |
| 2 | 6.540 | 6457352 | 27.21 |
| 3 | 8.877 | 5403142 | 22.77 |
| 4 | 9.845 | 5396951 | 22.74 |

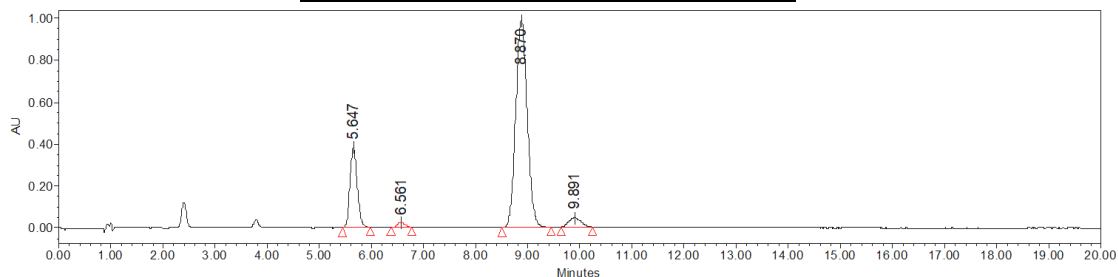

| Name | Retention Time | Area     | % Area |
|------|----------------|----------|--------|
| 1    | 5.647          | 3731884  | 18.74  |
| 2    | 6.562          | 250345   | 1.26   |
| 3    | 8.870          | 15278513 | 76.70  |
| 4    | 9.891          | 658143   | 3.30   |

Methyl (*R*)-3-((*S*)-5,5-dimethyl-2-oxocyclohexyl)-5-methoxy-2,3-dihydrobenzo[*d*]isothiazole-3-carboxylate 1,1-dioxide **4ae**

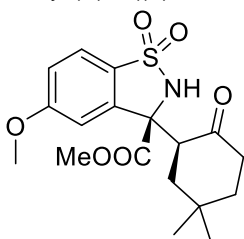

**Result:** colorless oil, 99% yield, 97% ee, 86:14 dr; SFC ((Lux 5u Cellulose-1, CO<sub>2</sub>/PrOH = 90/10, flow rate = 1.0 mL/min, λ = 230 nm), *t*<sub>1</sub> = 12.72 min, *t*<sub>2</sub> = 14.06 min, *t*<sub>3</sub> = 20.71 min, *t*<sub>4</sub> = 27.39 min.

**<sup>1</sup>H NMR** (400 MHz, Chloroform-*d*) δ 7.68 (d, *J* = 8.4 Hz, 1H), 7.06 (dd, *J* = 8.8, 2.4 Hz, 1H), 6.94 (d, *J* = 2.4 Hz, 1H), 5.82 (s, 1H), 3.86 (s, 3H), 3.81 (s, 3H), 3.30 (dd, *J* = 13.6, 5.2 Hz, 1H), 2.58 – 2.43 (m, 1H), 2.36 – 2.26 (m, 1H), 2.01 (t, *J* = 13.2 Hz, 1H), 1.77 – 1.60 (m, 3H), 1.12 (s, 3H), 1.02 (s, 3H).

**<sup>13</sup>C NMR** (100 MHz, Chloroform-*d*) δ 209.2, 170.0, 163.0, 138.4, 128.3, 122.9, 115.9, 111.1, 67.6, 55.9, 55.2, 53.7, 42.3, 39.1, 38.3, 31.4, 30.9, 24.1.

**HRMS** (FTMS+c ESI) *m/z*: [M + Na]<sup>+</sup> calcd for [C<sub>18</sub>H<sub>23</sub>NO<sub>6</sub>S+Na<sup>+</sup>]: 378.1597, found 378.1588.

**IR** (film): ν (cm<sup>-1</sup>) 3280, 2956, 2856, 1743, 1710, 1598, 1486, 1287, 1248, 1184, 1134, 1019, 738.

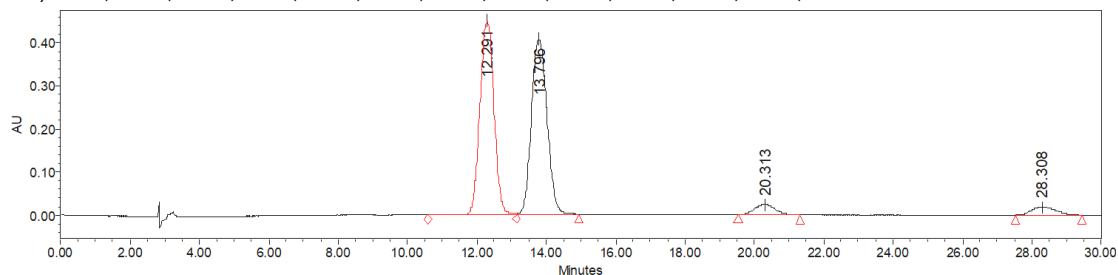

| Name | Retention Time | Area     | % Area |
|------|----------------|----------|--------|
| 1    | 12.291         | 12753543 | 46.67  |
| 2    | 13.796         | 12696128 | 46.46  |
| 3    | 20.313         | 954946   | 3.49   |
| 4    | 28.308         | 920296   | 3.37   |

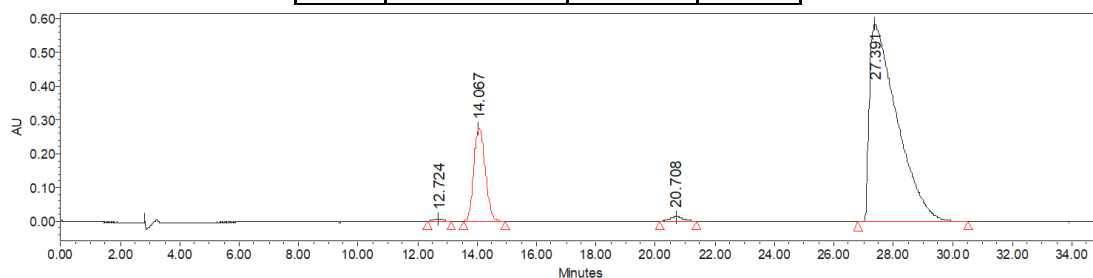

| Name | Retention Time | Area     | % Area |
|------|----------------|----------|--------|
| 1    | 12.724         | 180688   | 0.39   |
| 2    | 14.067         | 7398011  | 16.16  |
| 3    | 20.708         | 459206   | 1.00   |
| 4    | 27.391         | 37748314 | 82.44  |

Methyl (*R*)-5-methoxy-3-((1*S*,5*R*)-2-oxo-5-phenylcyclohexyl)-2,3-dihydrobenzo[*d*]isothiazole-3-carboxylate 1,1-dioxide **4ag**

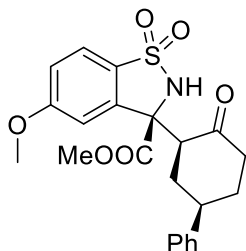

**Result:** colorless oil, 80% yield, 94% ee, 86:14 dr; SFC (Daicel chiralcel OX, CO<sub>2</sub>/MeOH = 80/20, flow rate = 1.5 mL/min, λ = 230 nm), t<sub>1</sub> = 9.24 min, t<sub>2</sub> = 10.15 min, t<sub>3</sub> = 12.58 min, t<sub>4</sub> = 25.94 min.

**<sup>1</sup>H NMR** (600 MHz, Chloroform-*d*) δ 7.72 – 7.68 (m, 1H), 7.37 – 7.30 (m, 2H), 7.26 – 7.20 (m, 3H), 7.04 (dd, *J* = 8.4, 2.4 Hz, 1H), 6.91 (d, *J* = 2.4 Hz, 1H), 5.95 (s, 1H), 3.85 (s, 3H), 3.80 (s, 3H), 3.38 (dd, *J* = 13.2, 4.8 Hz, 1H), 3.08 – 3.01 (m, 1H), 2.66 – 2.53 (m, 2H), 2.47 – 2.40 (m, 1H), 2.25 – 2.18 (m, 2H), 2.02 – 1.94 (m, 1H).

**<sup>13</sup>C NMR** (150 MHz, Chloroform-*d*) δ 208.2, 169.8, 162.9, 143.8, 138.3, 128.6, 126.8, 126.6, 126.5, 123.0, 115.8, 111.2, 67.1, 58.9, 55.9, 53.8, 43.2, 41.6, 37.3, 34.3.

**HRMS** (FTMS+c ESI) *m/z*: [M + Na]<sup>+</sup> calcd for [C<sub>22</sub>H<sub>23</sub>NO<sub>6</sub>S+H<sup>+</sup>]: 430.1318, found 430.1319.

**IR** (film): ν (cm<sup>-1</sup>) 3274, 2953, 1739, 1714, 1598, 1484, 1287, 1247, 1185, 1137, 1020, 736, 702, 579.

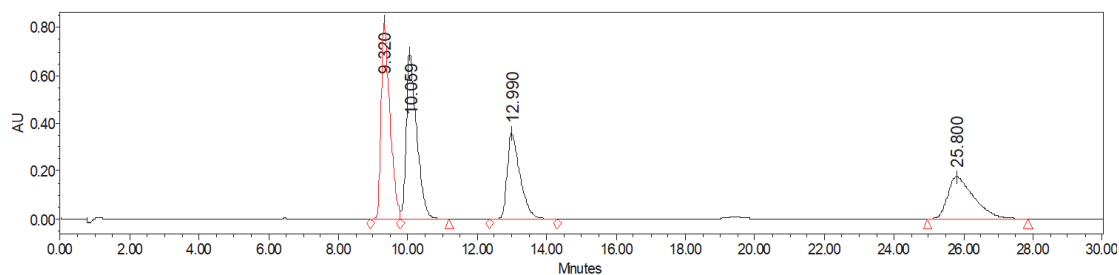

| Name | Retention Time | Area     | % Area |
|------|----------------|----------|--------|
| 1    | 9.320          | 14468582 | 30.60  |
| 2    | 10.059         | 14333832 | 30.31  |
| 3    | 12.990         | 9271607  | 19.61  |
| 4    | 25.800         | 9211086  | 19.48  |

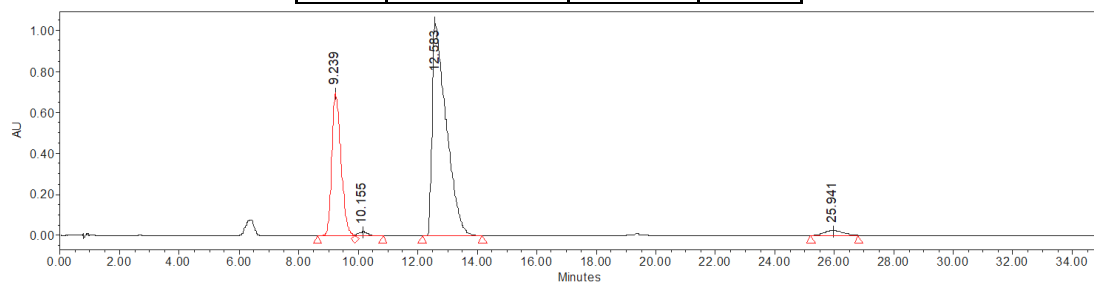

| Name | Retention Time | Area     | % Area |
|------|----------------|----------|--------|
| 1    | 9.239          | 14874311 | 29.53  |
| 2    | 10.155         | 395980   | 0.79   |
| 3    | 12.583         | 34116845 | 67.72  |
| 4    | 25.941         | 989735   | 1.96   |

(*R*)-3-((1*R*,2*S*)-2-hydroxycyclohexyl)-3-(hydroxymethyl)-5-methoxy-2,3-dihydrobenzo[*d*]isothiazole 1,1-dioxide **5**

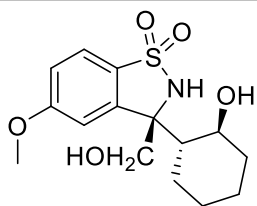

**Result:** colorless oil, 70% yield, 97% ee, >19:1 dr;  $[\alpha]^{24.3}_D = +94.6$  ( $c = 0.20$ ,  $\text{CH}_2\text{Cl}_2$ ); SFC (Lux 5u Cellulose-1,  $\text{CO}_2/\text{MeOH} = 80/20$ , flow rate = 1.0 mL/min,  $\lambda = 230$  nm),  $t_1 = 9.62$  min,  $t_2 = 10.16$  min.

**$^1\text{H NMR}$**  (400 MHz, Chloroform- $d$ )  $\delta$  7.66 (d,  $J = 8.8$  Hz, 1H), 7.03 (dd,  $J = 8.8, 2.4$  Hz, 1H), 6.77 (d,  $J = 2.0$  Hz, 1H), 5.88 (s, 1H), 4.01 (d,  $J = 11.6$  Hz, 1H), 3.88 (s, 3H), 3.67 (td,  $J = 10.0, 4.8$  Hz, 1H), 3.58 (d,  $J = 11.6$  Hz, 1H), 2.08 – 2.00 (m, 1H), 1.92 – 1.83 (m, 1H), 1.72 – 1.63 (m, 1H), 1.60 – 1.52 (m, 1H), 1.42 – 1.18 (m, 3H), 1.14 – 0.98 (m, 2H).

**$^{13}\text{C NMR}$**  (101 MHz, Chloroform- $d$ )  $\delta$  164.0, 144.3, 126.6, 123.3, 116.0, 107.3, 71.1, 69.5, 68.6, 55.9, 50.6, 36.6, 25.9, 25.0, 24.2.

**HRMS** (FTMS+c ESI)  $m/z$ :  $[\text{M} + \text{Na}]^+$  calcd for  $[\text{C}_{15}\text{H}_{21}\text{NO}_5\text{S} + \text{Na}^+]$ : 350.1032, found 350.1027

**IR** (film):  $\nu$  ( $\text{cm}^{-1}$ ) 3272, 2935, 2858, 1596, 1483, 1283, 1245, 1163, 1126, 1051, 1019, 738, 463.

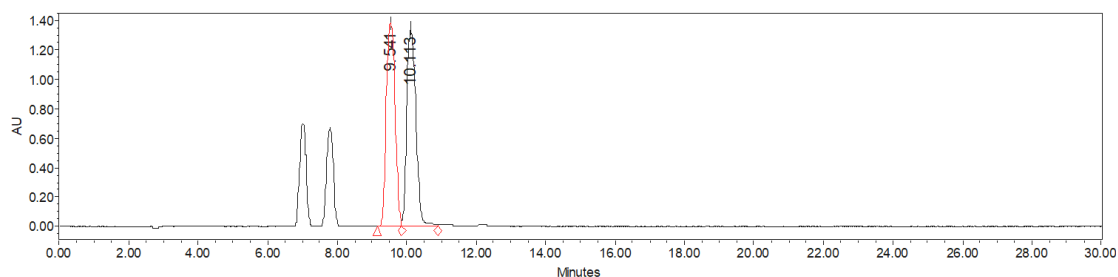

| Name | Retention Time | Area     | % Area |
|------|----------------|----------|--------|
| 1    | 9.541          | 24098120 | 49.72  |
| 2    | 10.113         | 24368930 | 50.28  |

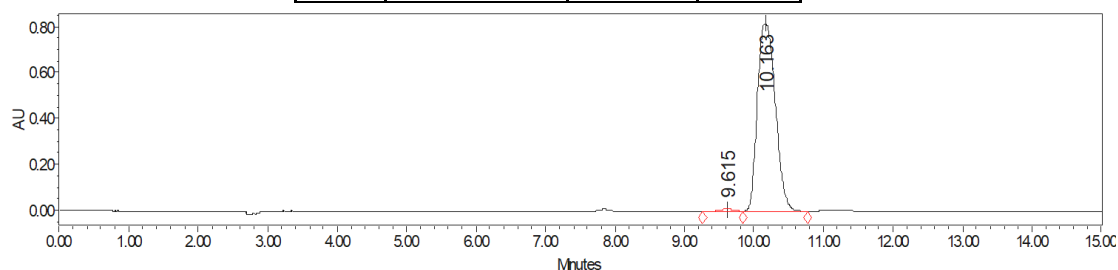

| Name | Retention Time | Area     | % Area |
|------|----------------|----------|--------|
| 1    | 9.615          | 243044   | 1.61   |
| 2    | 10.163         | 14888153 | 98.39  |

(3*R*,3*aR*,7*aS*)-5'-methoxy-3*a*,4,5,6,7,7*a*-hexahydro-2*H*,2'*H*-spiro[benzofuran-3,3'-benzo[*d*]isothiazol]-2-one 1',1'-dioxide **6**

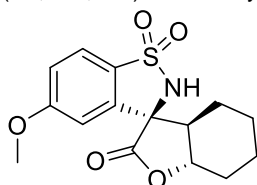

**Result:** colorless oil, 27% yield, 97% ee, >19:1 dr;  $[\alpha]^{24.0}_D = +80.9$  ( $c = 0.08$ ,  $\text{CH}_2\text{Cl}_2$ ); SFC (Daicel chiralcel IC-3,  $\text{CO}_2/\text{MeOH} = 80/20$ , flow rate = 1.5 mL/min,  $\lambda = 230$  nm),  $t_1 = 5.66$  min,  $t_2 = 7.46$  min.

**$^1\text{H NMR}$**  (400 MHz, Chloroform- $d$ )  $\delta$  7.70 (d,  $J = 8.8$  Hz, 1H), 7.10 (d,  $J = 8.8$  Hz, 1H), 6.73 (s, 1H), 5.10 (s, 1H), 4.23 (td,  $J = 11.2, 4.0$  Hz, 1H), 3.89 (s, 3H), 2.42 – 2.34 (m, 1H), 2.17 – 2.07 (m, 1H), 2.00 – 1.91 (m, 1H), 1.88 – 1.79 (m, 1H), 1.71 – 1.56 (m, 3H), 1.51 – 1.37 (m, 1H), 1.34 – 1.18 (m, 1H).

**$^{13}\text{C NMR}$**  (100 MHz, Chloroform- $d$ )  $\delta$  173.0, 164.1, 139.8, 129.0, 122.8, 117.4, 108.1, 82.6, 68.2, 56.0, 55.9, 30.2, 24.7, 23.6, 23.0.

**HRMS** (FTMS+c ESI)  $m/z$ :  $[\text{M} + \text{Na}]^+$  calcd for  $[\text{C}_{15}\text{H}_{17}\text{NO}_5\text{S} + \text{Na}^+]$ : 346.0719, found 346.0717.

**IR** (film):  $\nu$  ( $\text{cm}^{-1}$ ) 3256, 2941, 2867, 1780, 1598, 1484, 1289, 1254, 1187, 1133, 1075, 1018, 981, 860, 828, 742.

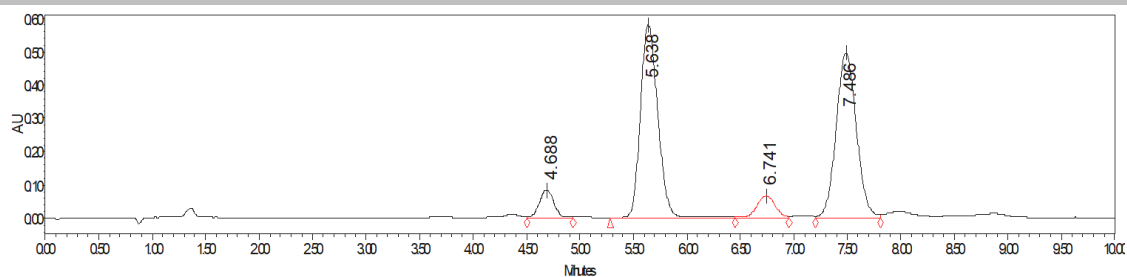

| Name | Retention Time | Area    | % Area |
|------|----------------|---------|--------|
| 1    | 4.688          | 774907  | 5.31   |
| 2    | 5.638          | 6509757 | 44.65  |
| 3    | 6.741          | 781415  | 5.36   |
| 4    | 7.486          | 6514625 | 44.68  |

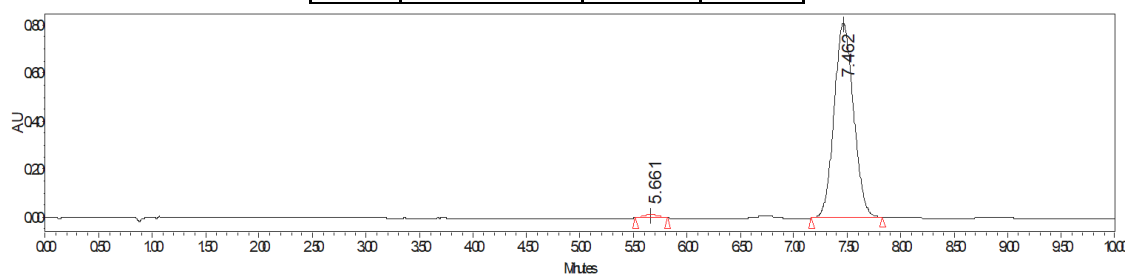

| Name | Retention Time | Area     | % Area |
|------|----------------|----------|--------|
| 1    | 5.661          | 116186   | 1.12   |
| 2    | 7.462          | 10238736 | 98.88  |

Methyl (*R*)-3-((*R*, *E*)-2-(hydroxyimino)cyclohexyl)-5-methoxy-2,3-dihydrobenzo[*d*]isothiazole-3-carboxylate 1,1-dioxide **7**

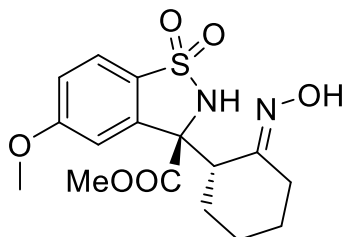

**Result:** white solid, m.p. 219 - 212 °C, 85% yield, 97% ee, >19:1 dr;  $[\alpha]_D^{21.0} = +98.3$  ( $c = 1.21$ ,  $\text{CH}_2\text{Cl}_2$ ); SFC (Daicel chiralcel OX-3,  $\text{CO}_2/\text{MeOH} = 90/10$ , flow rate = 1.5 mL/min,  $\lambda = 230$  nm),  $t_1 = 4.36$  min,  $t_2 = 8.73$  min.

$^1\text{H NMR}$  (400 MHz, Chloroform-*d*)  $\delta$  7.69 (d,  $J = 8.8$  Hz, 1H), 7.52 (s, 1H), 7.09 (dd,  $J = 8.8, 2.4$  Hz, 1H), 7.01 (d,  $J = 2.4$  Hz, 1H), 5.91 (s, 1H), 3.89 (s, 3H), 3.75 (s, 3H), 3.45 – 3.38 (m, 1H), 3.29 (dd,  $J = 12.4, 4.4$  Hz, 1H), 1.88 – 1.81 (m, 1H), 1.80 – 1.73 (m, 1H), 1.71 – 1.62 (m, 1H), 1.59 – 1.48 (m, 1H), 1.44 – 1.32 (m, 2H), 1.29 – 1.22 (m, 1H).

$^{13}\text{C NMR}$  (100 MHz, Chloroform-*d*)  $\delta$  171.3, 164.0, 159.1, 138.0, 127.2, 123.2, 117.0, 108.2, 69.2, 56.0, 53.8, 49.8, 26.2, 25.2, 24.9, 24.5.

**HRMS** (FTMS+c ESI)  $m/z$ :  $[\text{M} + \text{Na}]^+$  calcd for  $[\text{C}_{16}\text{H}_{20}\text{N}_2\text{O}_6\text{S} + \text{Na}^+]$ : 391.0934, found 391.0928.

**IR** (film):  $\nu$  ( $\text{cm}^{-1}$ ) 3431, 2941, 2861, 1731, 1595, 1483, 1438, 1285, 1247, 1187, 1127, 1023, 896.

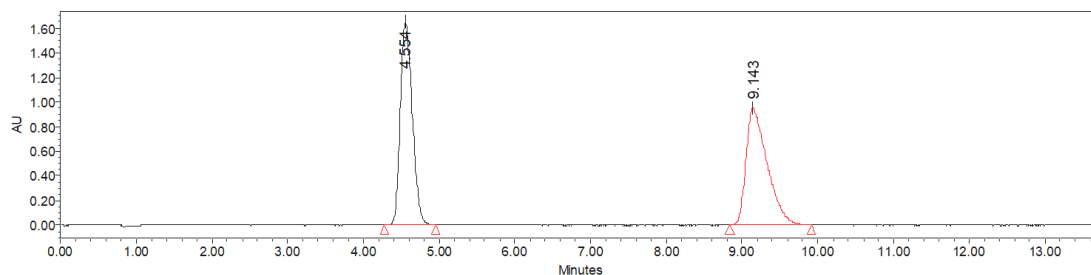

| Name | Retention Time | Area     | % Area |
|------|----------------|----------|--------|
| 1    | 4.554          | 18164863 | 49.67  |
| 2    | 9.143          | 18408566 | 50.33  |

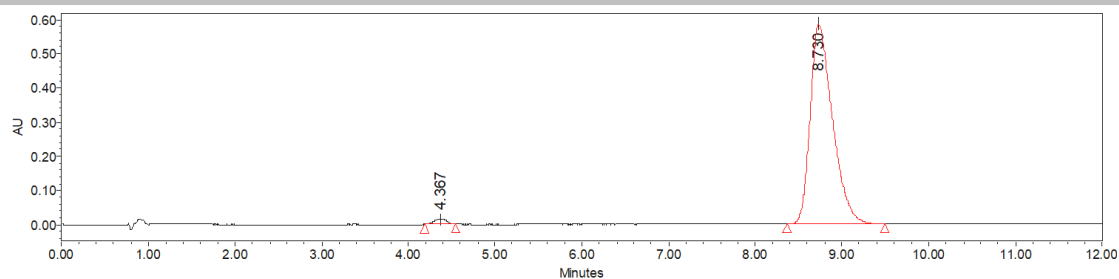

| Name | Retention Time | Area     | % Area |
|------|----------------|----------|--------|
| 1    | 4.367          | 155068   | 1.46   |
| 2    | 8.730          | 10458872 | 98.54  |

Methyl (11*aR*,11*bR*)-2-methoxy-9,10,11,11*a*-tetrahydrobenzo[4,5]isothiazolo[2,3-*b*]indazole-11*b*(8*H*)-carboxylate 5,5-dioxide **8**

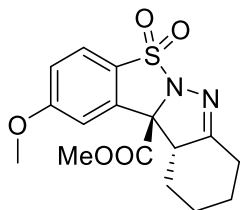

**Result:** colorless oil, 75% yield, 97% ee, >19:1 dr;  $[\alpha]_D^{22.5} = +16.3$  ( $c = 0.39$ ,  $\text{CH}_2\text{Cl}_2$ ); SFC (Daicel chiralcel IA-3,  $\text{CO}_2/\text{MeOH} = 90/10$ , flow rate = 1.5 mL/min,  $\lambda = 230$  nm),  $t_1 = 5.29$  min,  $t_2 = 6.34$  min.

**$^1\text{H NMR}$**  (400 MHz, Chloroform-*d*)  $\delta$  7.72 (d,  $J = 8.8$  Hz, 1H), 7.11 (dd,  $J = 8.8, 2.4$  Hz, 1H), 6.85 (d,  $J = 2.0$  Hz, 1H), 3.88 (s, 3H), 3.78 (s, 3H), 3.73 (dd,  $J = 12.8, 6.0$  Hz, 1H), 2.88 – 2.79 (m, 1H), 2.32 – 2.21 (m, 1H), 2.18 – 2.10 (m, 1H), 2.02 – 1.94 (m, 1H), 1.93 – 1.86 (m, 1H), 1.59 – 1.46 (m, 1H), 1.43 – 1.27 (m, 1H), 1.05 – 0.93 (m, 1H).

**$^{13}\text{C NMR}$**  (100 MHz, Chloroform-*d*)  $\delta$  170.4, 165.2, 163.6, 135.7, 126.7, 124.1, 117.3, 111.2, 56.0, 54.7, 54.0, 30.5, 27.9, 25.6, 24.3.

**HRMS** (FTMS+c ESI)  $m/z$ :  $[\text{M} + \text{Na}]^+$  calcd for  $[\text{C}_{16}\text{H}_{18}\text{N}_2\text{O}_5\text{S} + \text{Na}^+]$ : 351.1009, found 351.1005.

**IR** (film):  $\nu$  ( $\text{cm}^{-1}$ ) 2927, 2857, 1742, 1592, 1481, 1435, 1333, 1247, 1187, 1172, 1016, 962, 738, 701, 644.

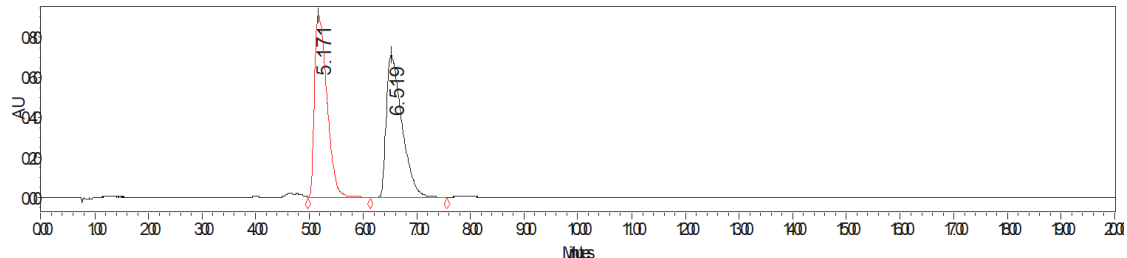

| Name | Retention Time | Area     | % Area |
|------|----------------|----------|--------|
| 1    | 5.171          | 14704491 | 49.99  |
| 2    | 6.519          | 14710346 | 50.01  |

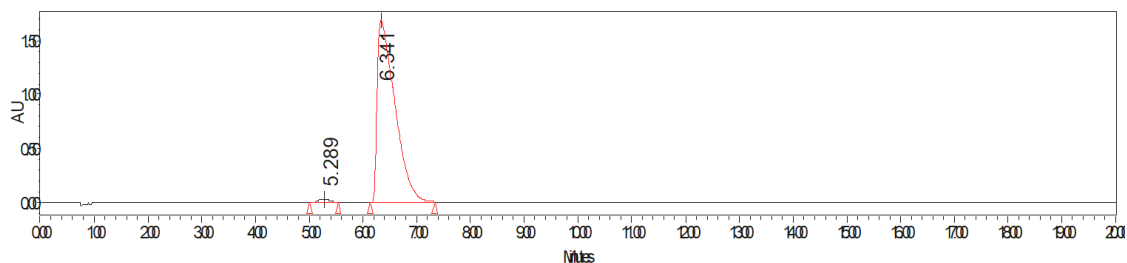

| Name | Retention Time | Area     | % Area |
|------|----------------|----------|--------|
| 1    | 5.289          | 512896   | 1.30   |
| 2    | 6.341          | 38867964 | 98.70  |

Methyl (*R*)-3-((1*S*,2*R*)-2-hydroxycyclohexyl)-5-methoxy-2,3-dihydrobenzo[*d*]isothiazole-3-carboxylate 1,1-dioxide **9**



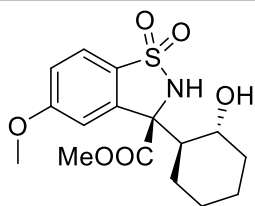

**Result:** colorless oil, 57% yield, 99% ee, >19:1 dr;  $[\alpha]_{D}^{20.7} = -3.1$  ( $c = 0.36$ ,  $\text{CH}_2\text{Cl}_2$ ); SFC (Lux 5u Cellulose-1,  $\text{CO}_2/\text{MeOH} = 80/20$ , flow rate = 1.0 mL/min,  $\lambda = 230$  nm),  $t_1 = 6.31$  min,  $t_2 = 6.91$  min.

**$^1\text{H NMR}$**  (600 MHz, Chloroform- $d$ )  $\delta$  7.59 (d,  $J = 8.4$  Hz, 1H), 7.20 (d,  $J = 2.4$  Hz, 1H), 7.02 (dd,  $J = 8.4, 2.4$  Hz, 1H), 5.90 (s, 1H), 3.88 (s, 3H), 3.87 (s, 3H), 3.86 – 3.81 (m, 1H), 2.34 – 2.28 (m, 1H), 1.89 – 1.83 (m, 1H), 1.83 – 1.66 (m, 3H), 1.49 – 1.42 (m, 1H), 1.33 – 1.18 (m, 4H).

**$^{13}\text{C NMR}$**  (150 MHz, Chloroform- $d$ )  $\delta$  170.8, 163.5, 141.8, 126.0, 122.3, 116.3, 110.3, 71.8, 70.5, 55.8, 54.1, 52.3, 35.6, 27.8, 25.3, 24.6.

**HRMS** (FTMS+c ESI)  $m/z$ :  $[\text{M} + \text{Na}]^+$  calcd for  $[\text{C}_{16}\text{H}_{21}\text{NO}_6\text{S} + \text{Na}^+]$ : 378.0981, found 378.0978

**IR** (film):  $\nu$  ( $\text{cm}^{-1}$ ) 2934, 2858, 1736, 1596, 1483, 1443, 1286, 1250, 1185, 1129, 1071, 1021, 965, 669.

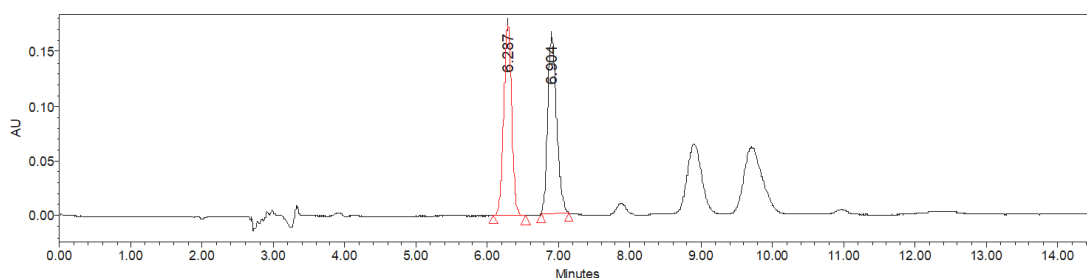

| Name | Retention Time | Area    | % Area |
|------|----------------|---------|--------|
| 1    | 6.287          | 1353481 | 49.13  |
| 2    | 6.904          | 1401478 | 50.87  |

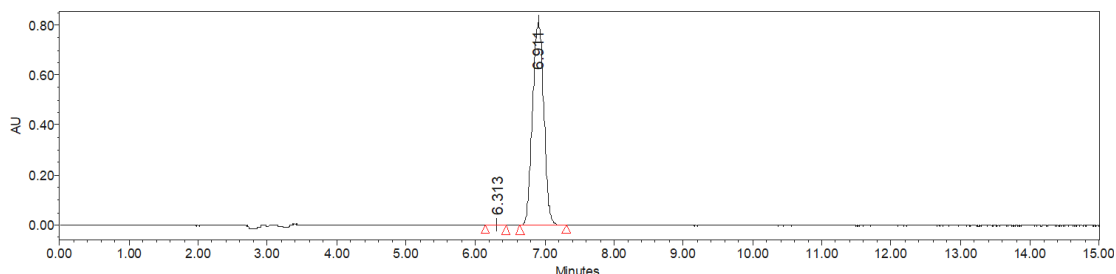

| Name | Retention Time | Area    | % Area |
|------|----------------|---------|--------|
| 1    | 6.313          | 33352   | 0.36   |
| 2    | 6.911          | 9190175 | 99.64  |

(3R,3aS,7aR)-5'-methoxy-3a,4,5,6,7,7a-hexahydro-2H,2'H-spiro[benzofuran-3,3'-benzo[d]isothiazol]-2-one 1',1'-dioxide **10**

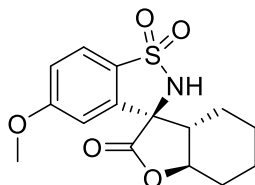

**Result:** colorless oil, 35% yield, 99% ee, >19:1 dr;  $[\alpha]_{D}^{20.4} = -84.2$  ( $c = 0.40$ ,  $\text{CH}_2\text{Cl}_2$ ); SFC (Daicel chiralcel IC-3,  $\text{CO}_2/\text{MeOH} = 80/20$ , flow rate = 1.5 mL/min,  $\lambda = 230$  nm),  $t_1 = 4.38$  min,  $t_2 = 7.06$  min.

**$^1\text{H NMR}$**  (400 MHz, Chloroform- $d$ )  $\delta$  7.68 (d,  $J = 8.4$  Hz, 1H), 7.05 (dd,  $J = 8.4, 2.4$  Hz, 1H), 6.77 (d,  $J = 2.4$  Hz, 1H), 5.09 (s, 2H), 3.88 (s, 3H), 2.89 – 2.75 (m, 1H), 2.42 – 2.33 (m, 1H), 1.79 – 1.61 (m, 3H), 1.48 – 1.13 (m, 4H).

**$^{13}\text{C NMR}$**  (100 MHz, Chloroform- $d$ )  $\delta$  172.7, 139.4, 130.4, 122.6, 116.1, 111.6, 79.1, 71.6, 56.0, 45.6, 26.9, 24.2, 22.9, 19.34.

**HRMS** (FTMS+c ESI)  $m/z$ :  $[\text{M} + \text{Na}]^+$  calcd for  $[\text{C}_{15}\text{H}_{17}\text{NO}_5\text{S} + \text{Na}^+]$ : 346.0719, found 346.0709.

**IR** (film):  $\nu$  ( $\text{cm}^{-1}$ ) 3211, 2940, 2863, 1772, 1592, 1480, 1319, 1289, 1240, 1208, 1180, 1140, 950, 847, 731.

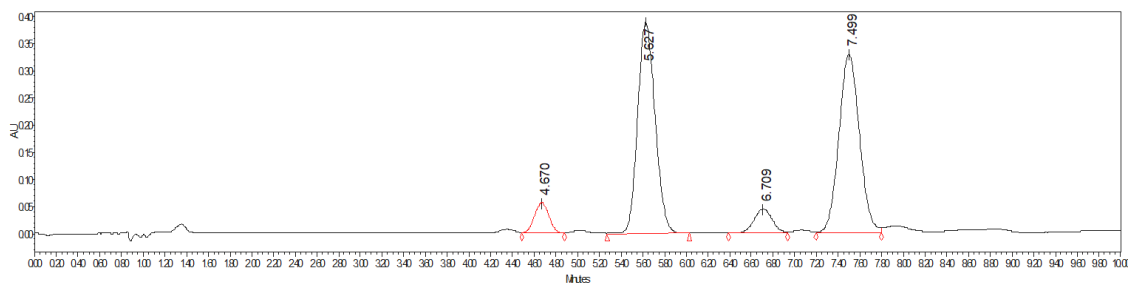

| Name | Retention Time | Area    | % Area |
|------|----------------|---------|--------|
| 1    | 4.670          | 522184  | 5.37   |
| 2    | 5.627          | 4330032 | 44.49  |
| 3    | 6.709          | 525056  | 5.40   |
| 4    | 7.499          | 4354376 | 44.74  |

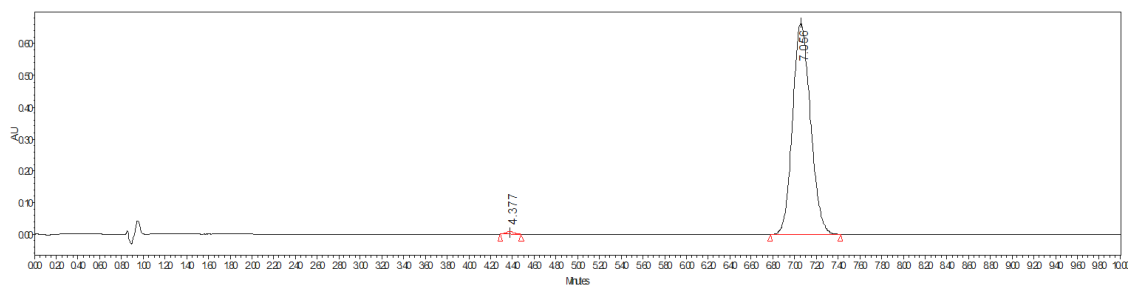

| Name | Retention Time | Area    | % Area |
|------|----------------|---------|--------|
| 1    | 4.377          | 42339   | 0.55   |
| 2    | 7.056          | 7599529 | 99.45  |

## 14. Copies of CD spectra for the products.

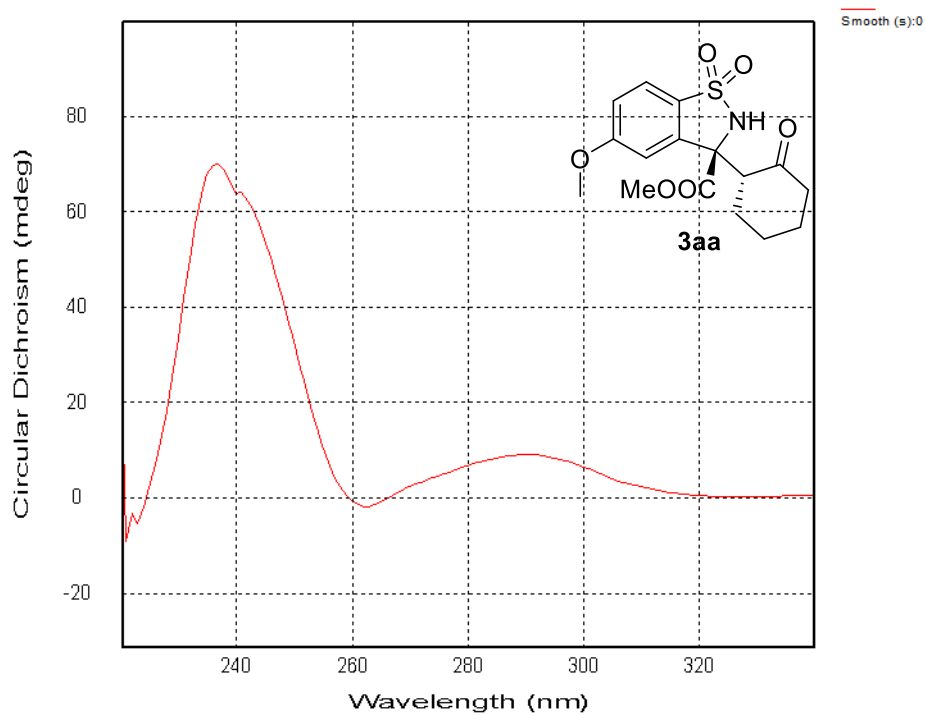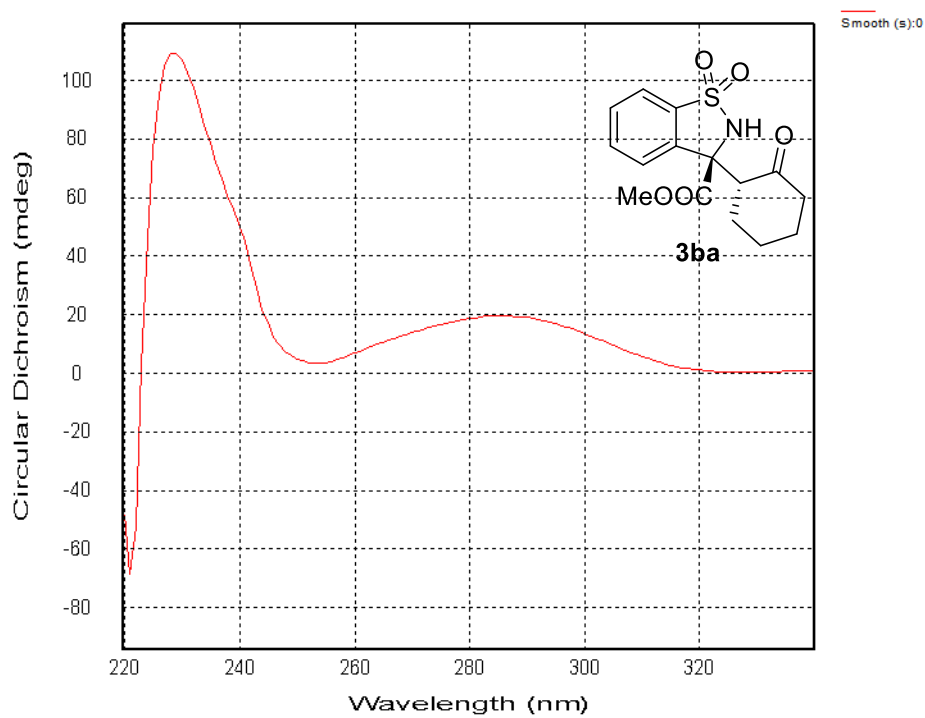

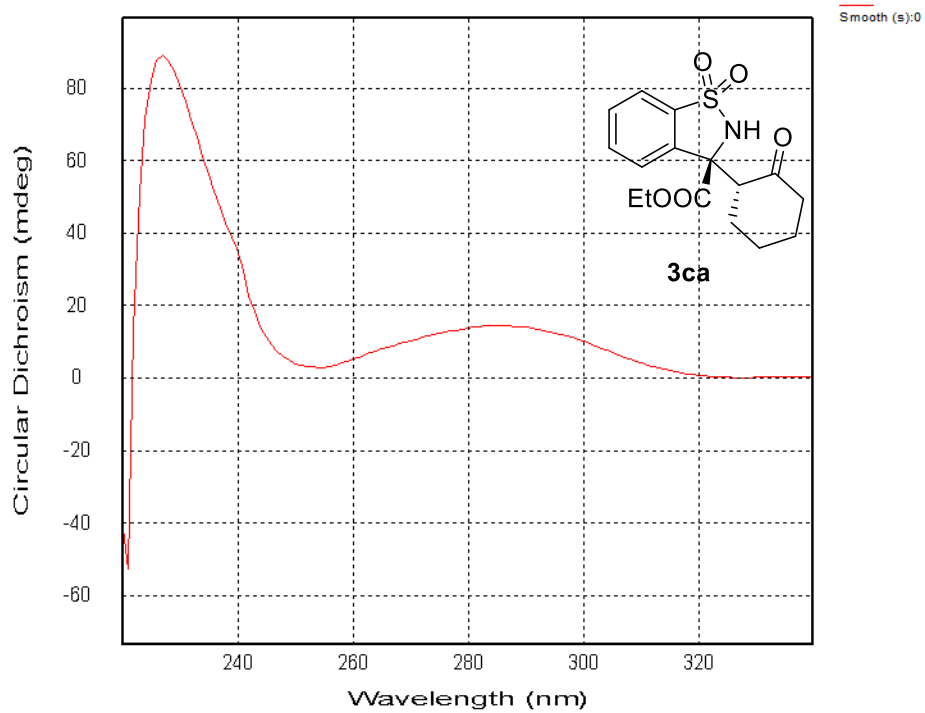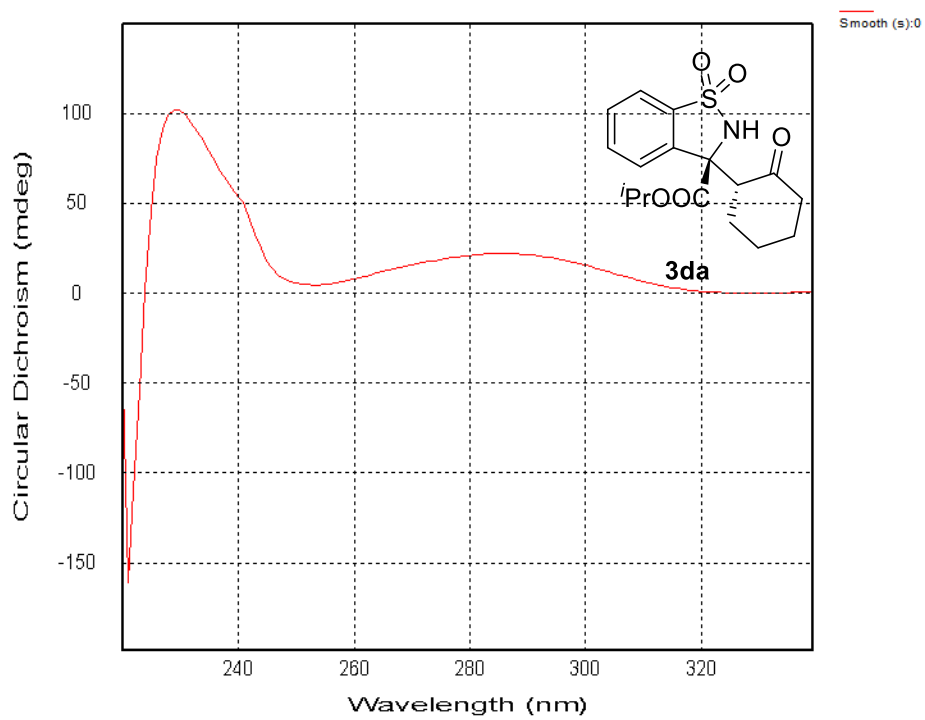

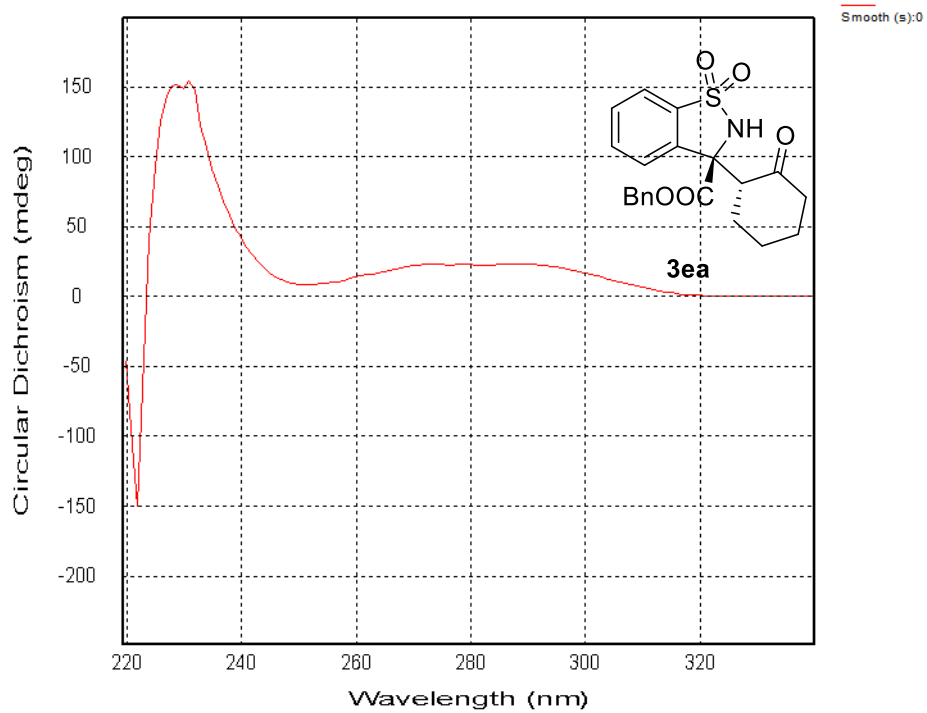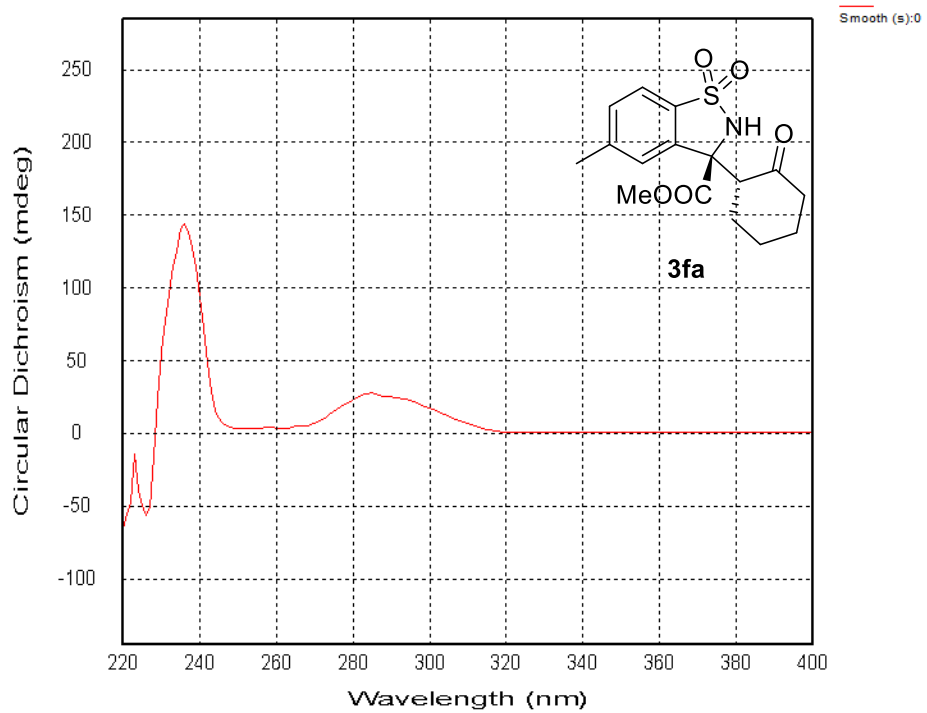

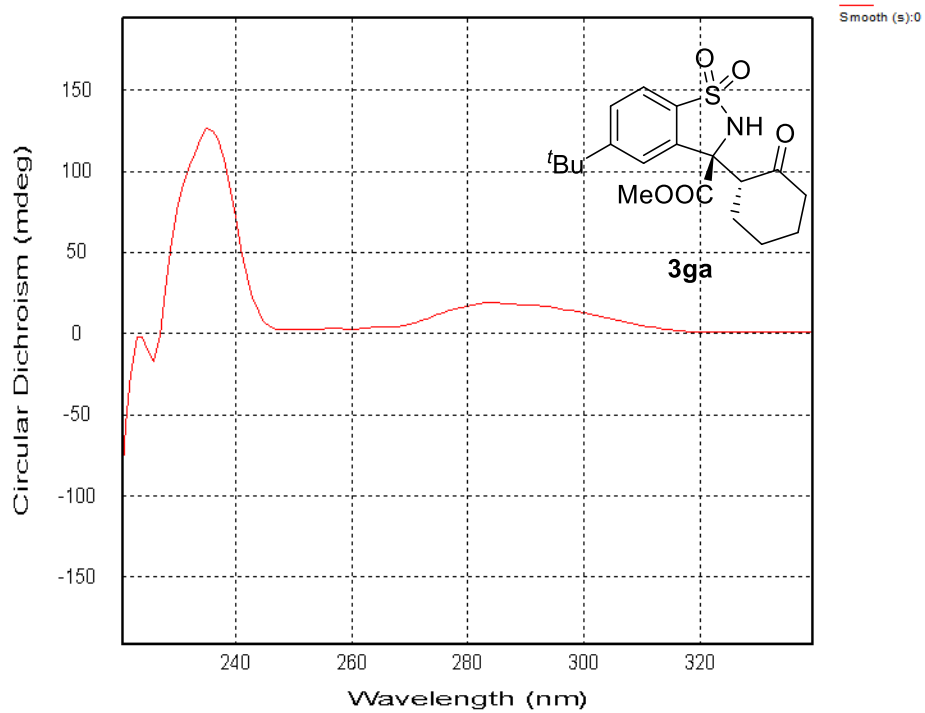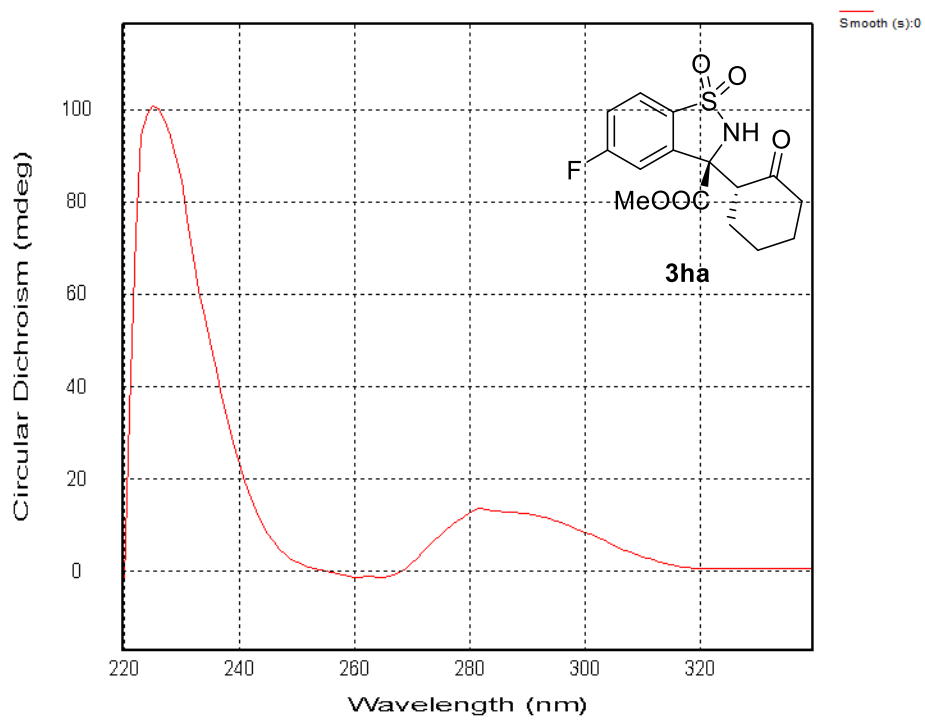

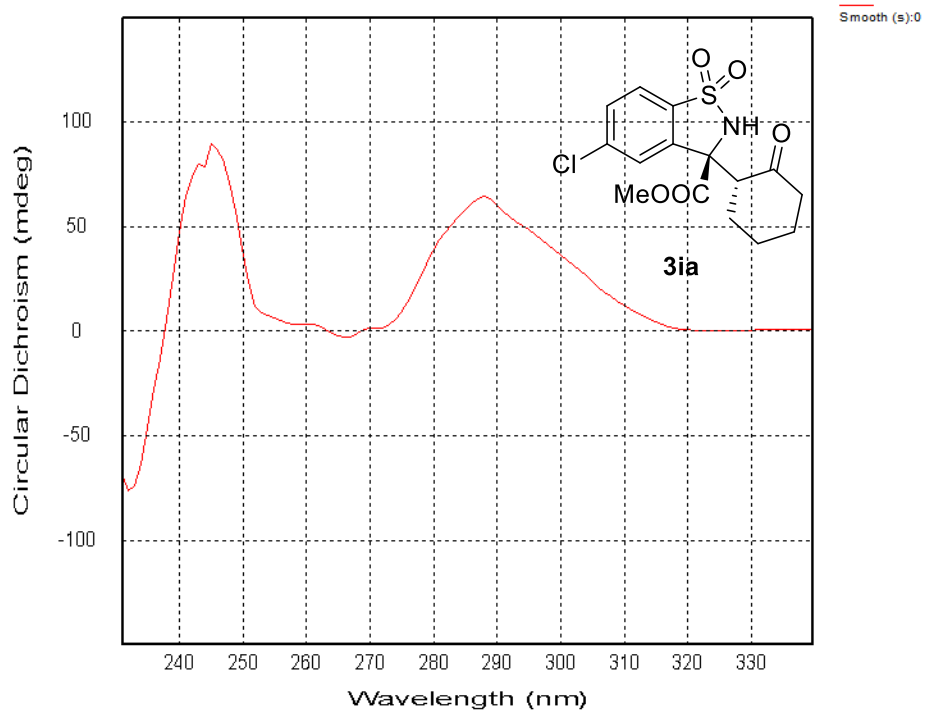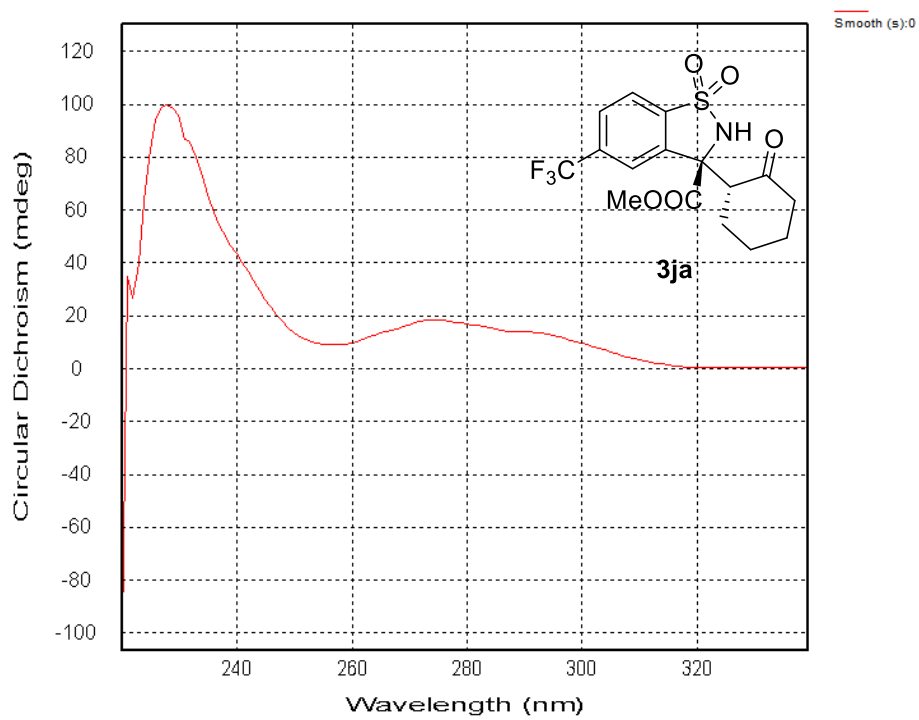

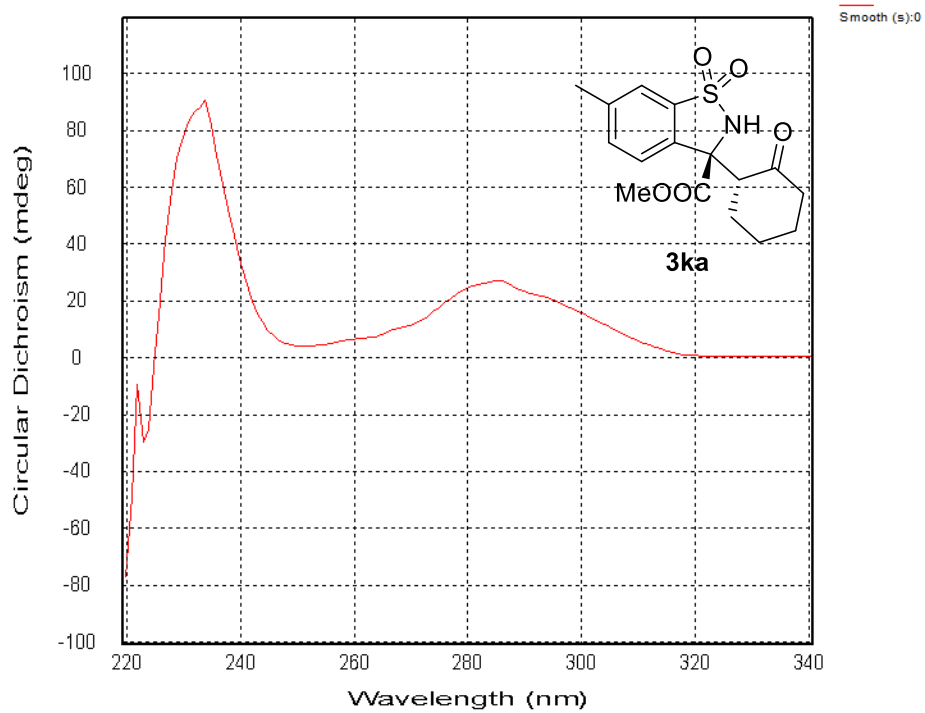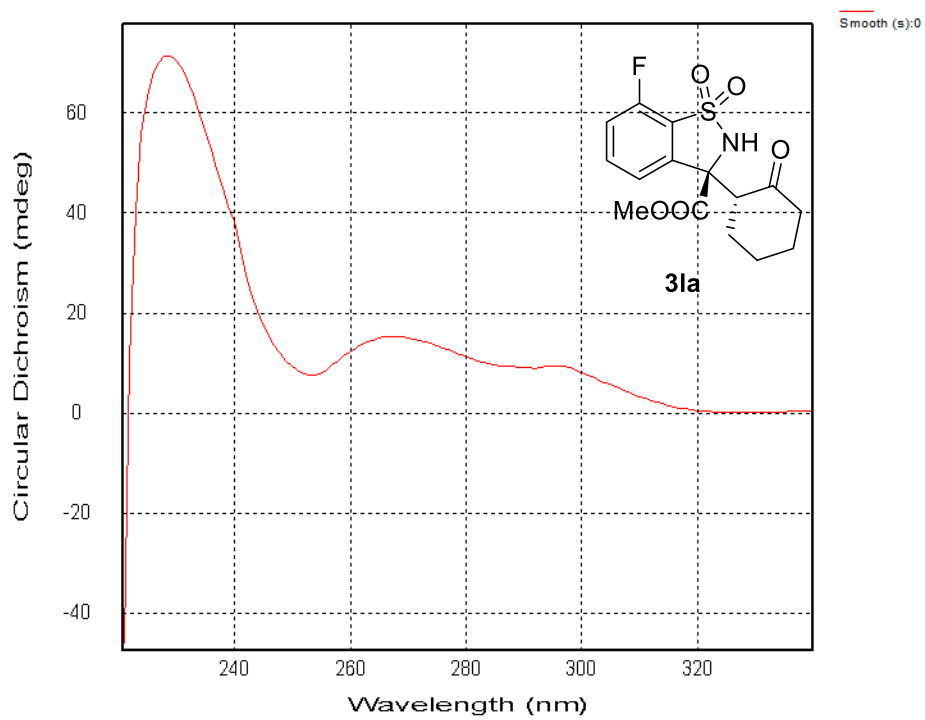



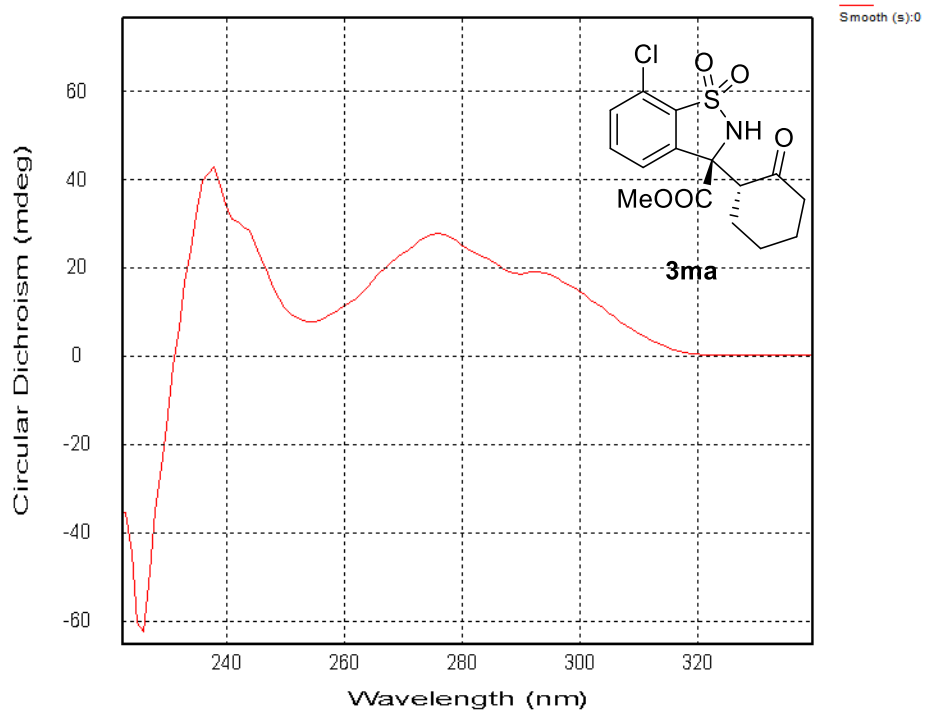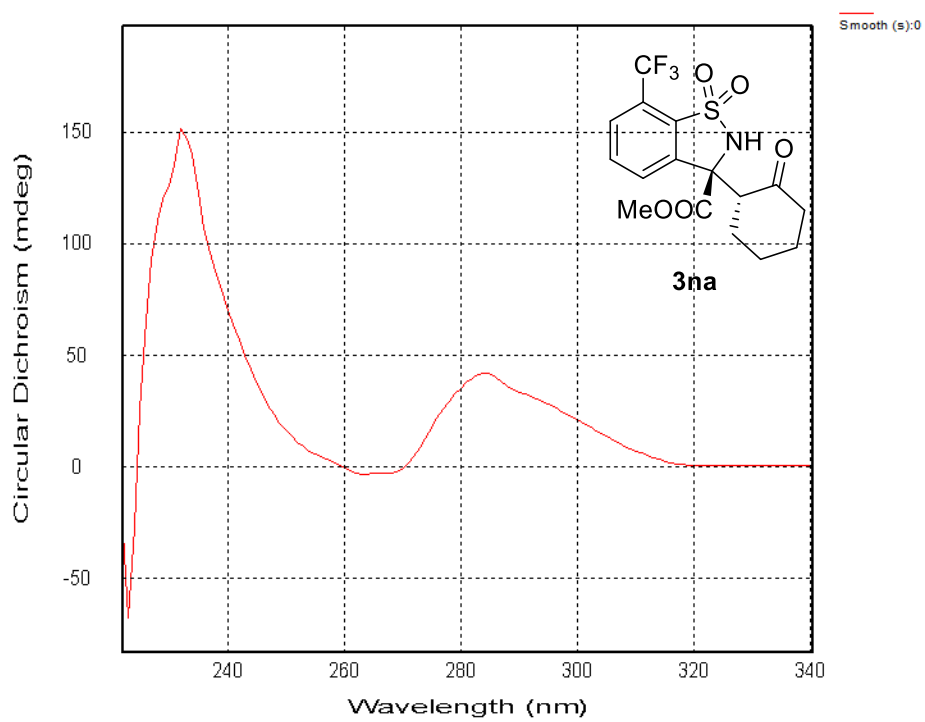

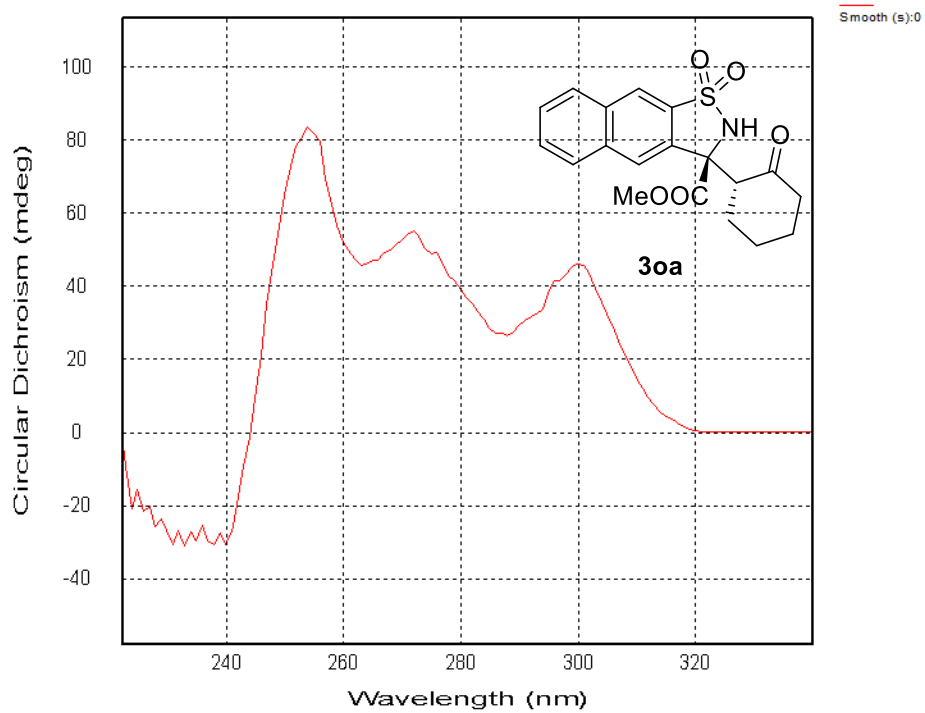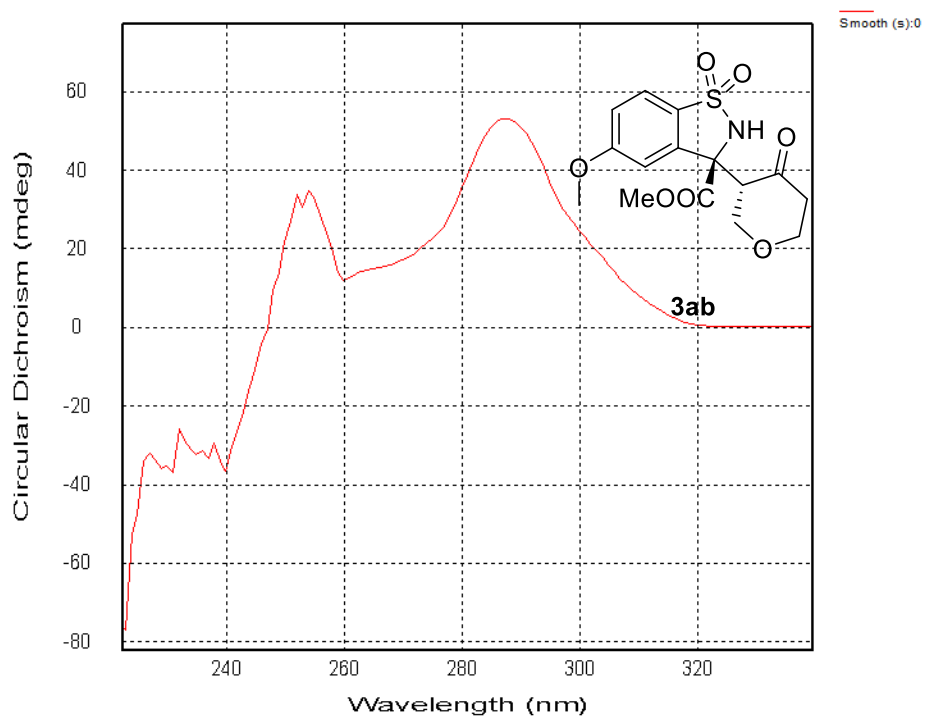

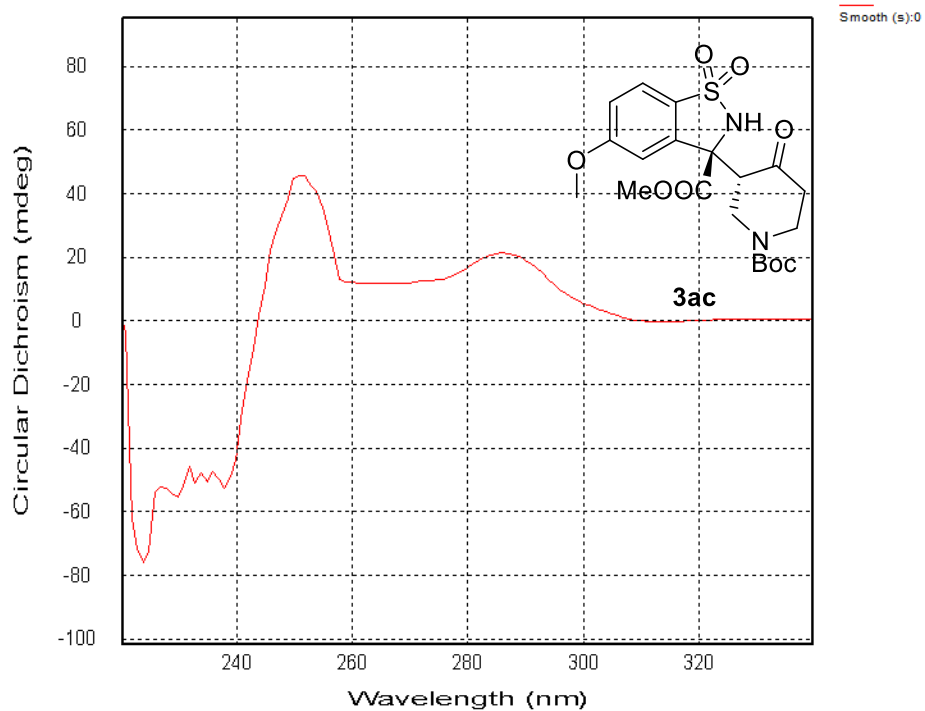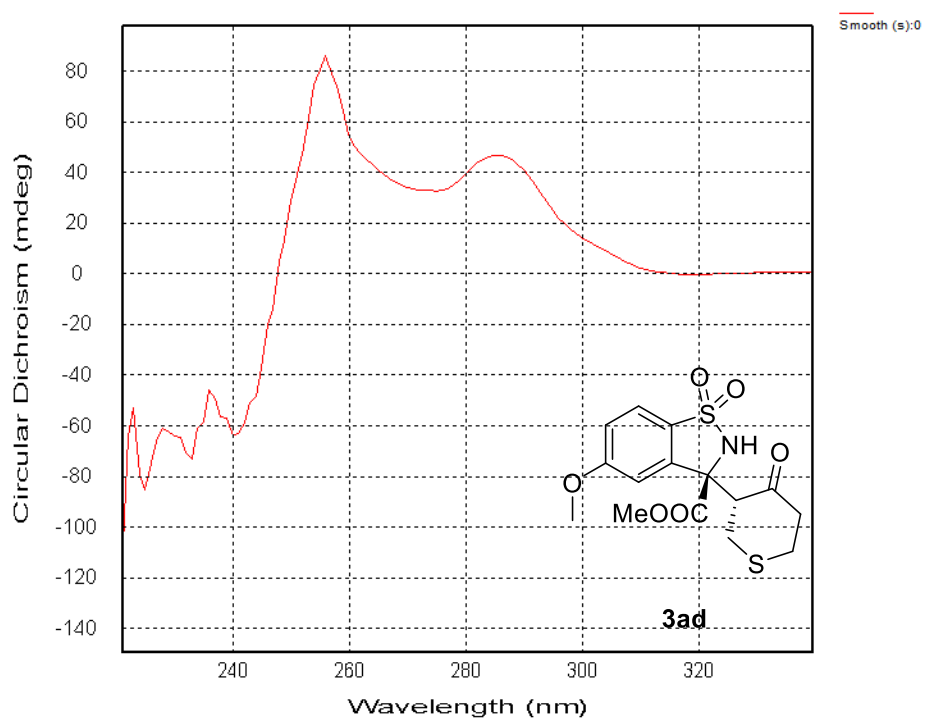

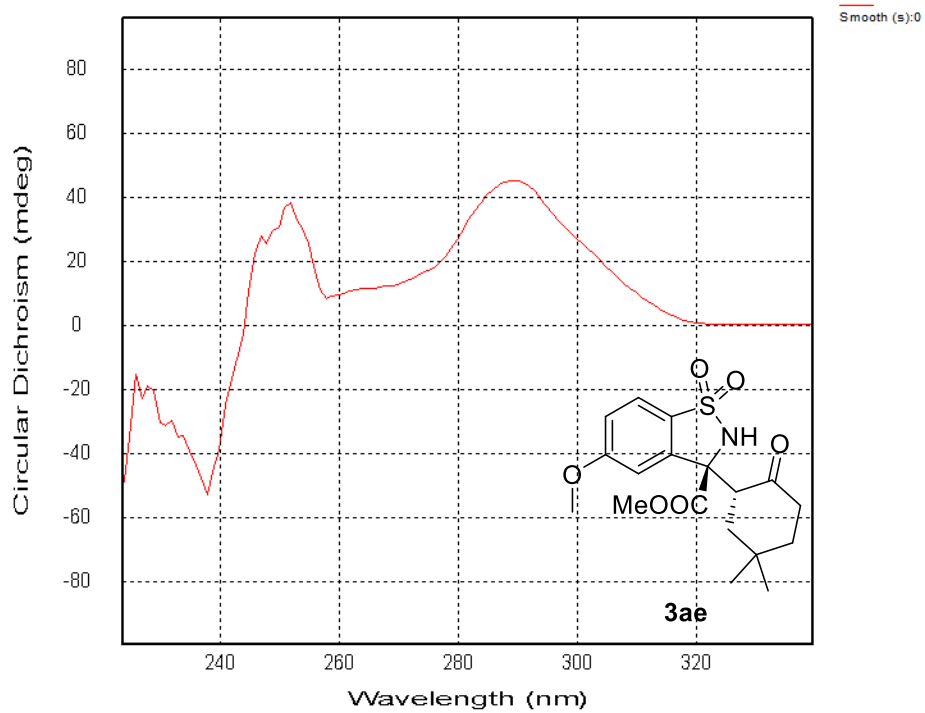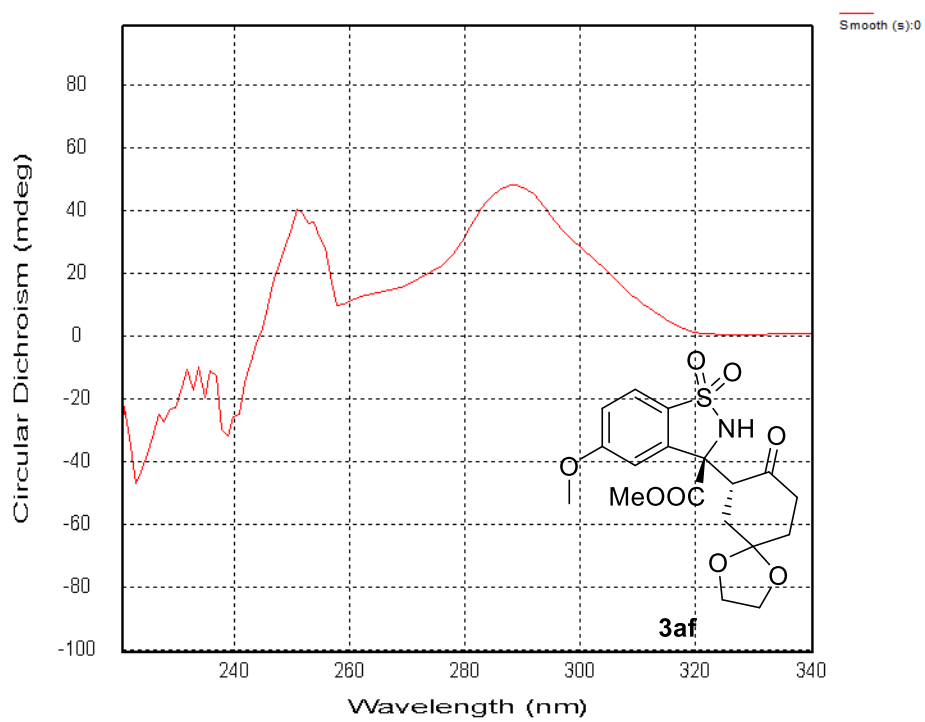

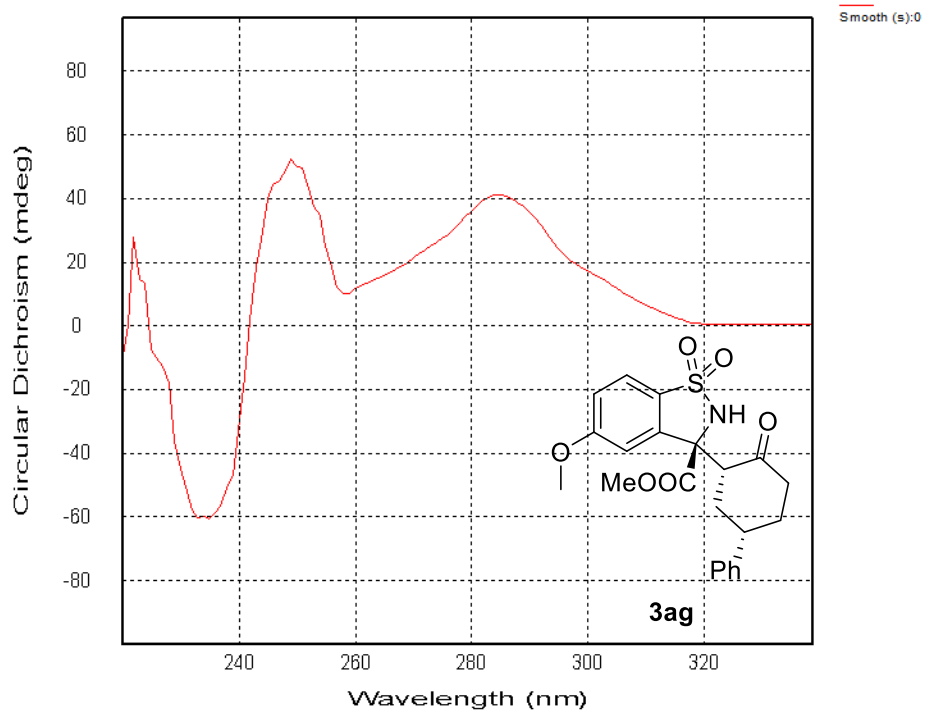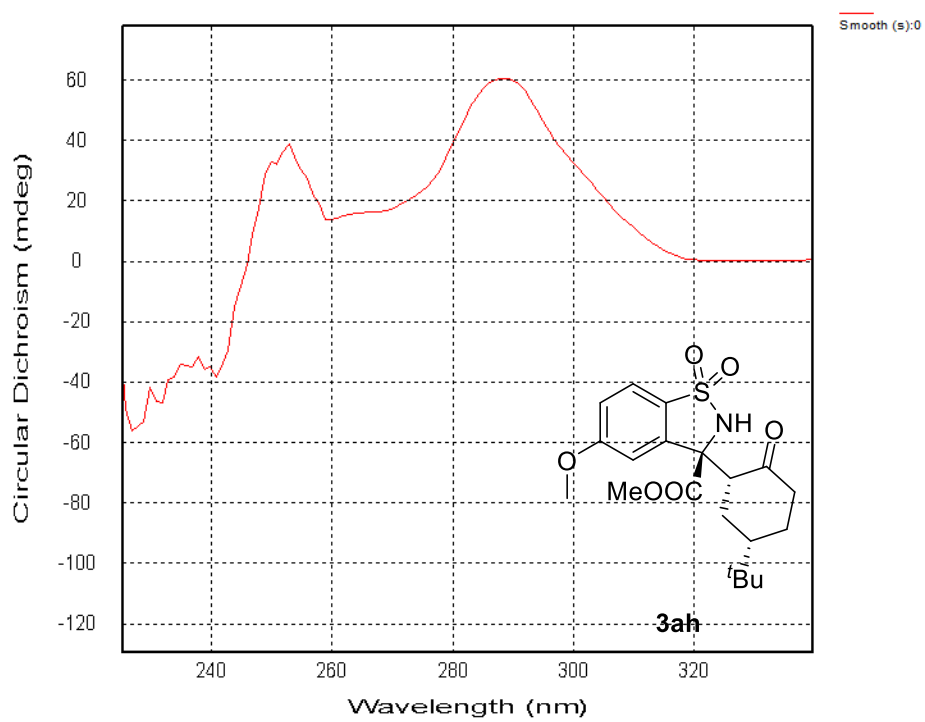

## 15. Copies of NMR spectra for the products

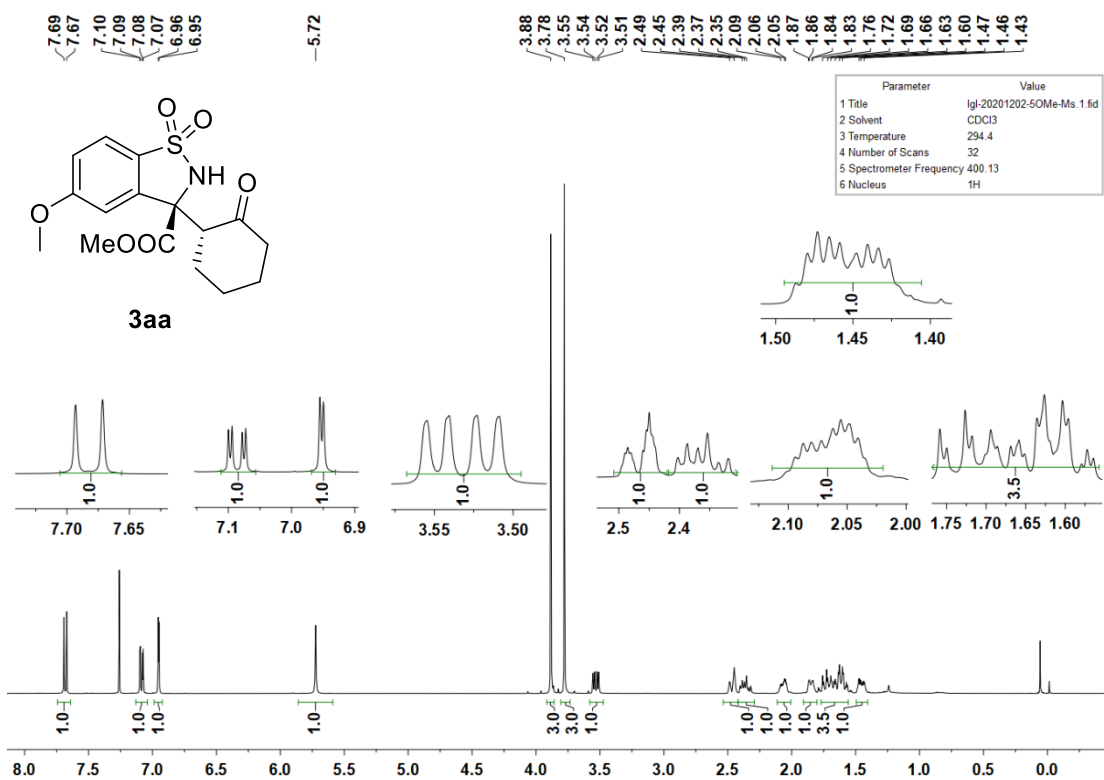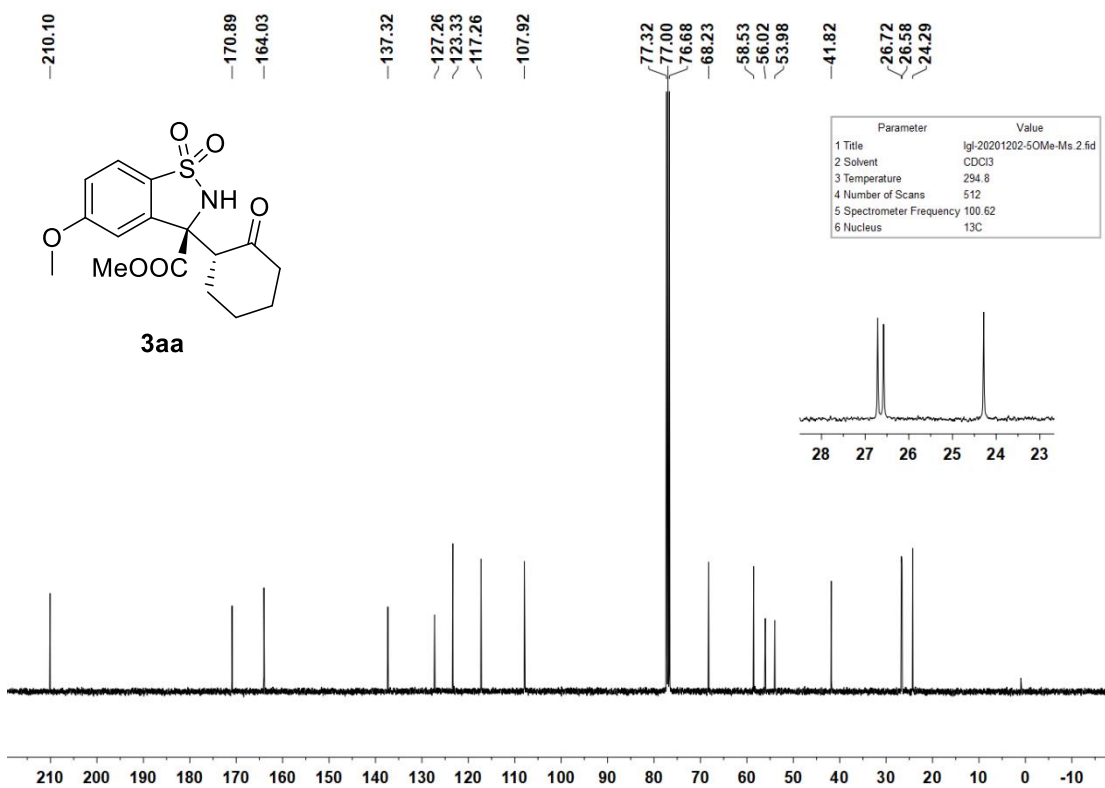

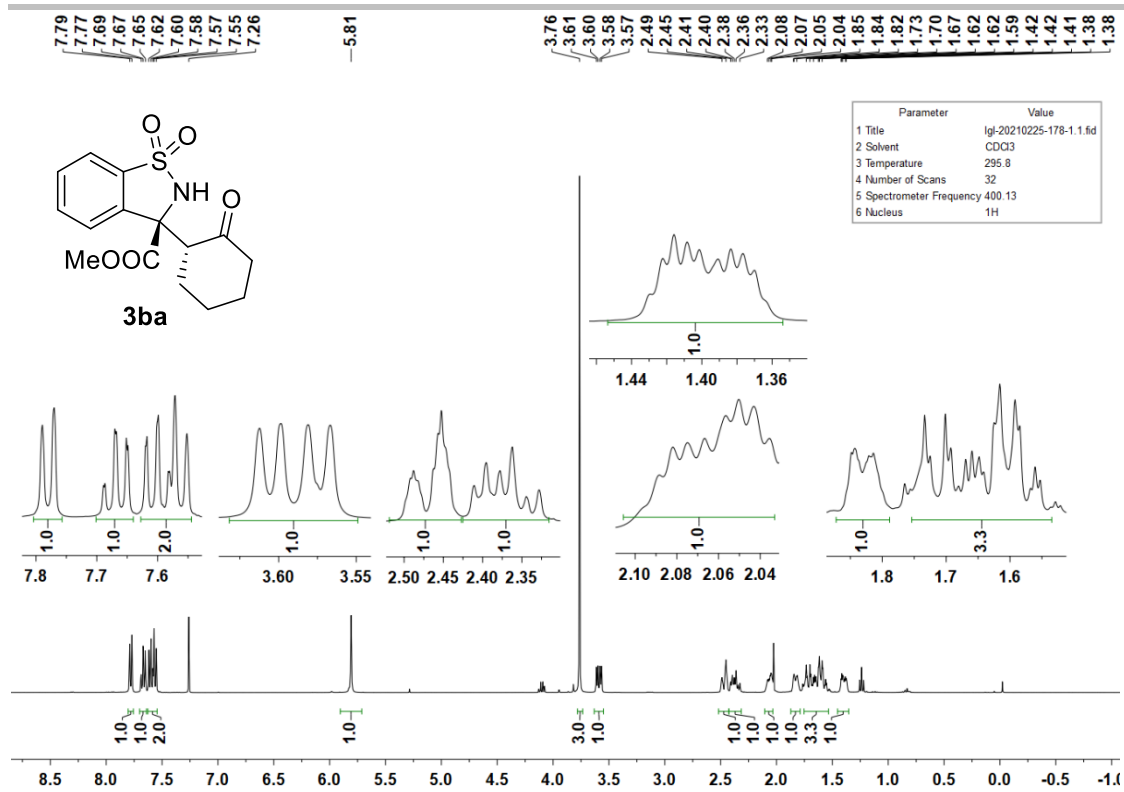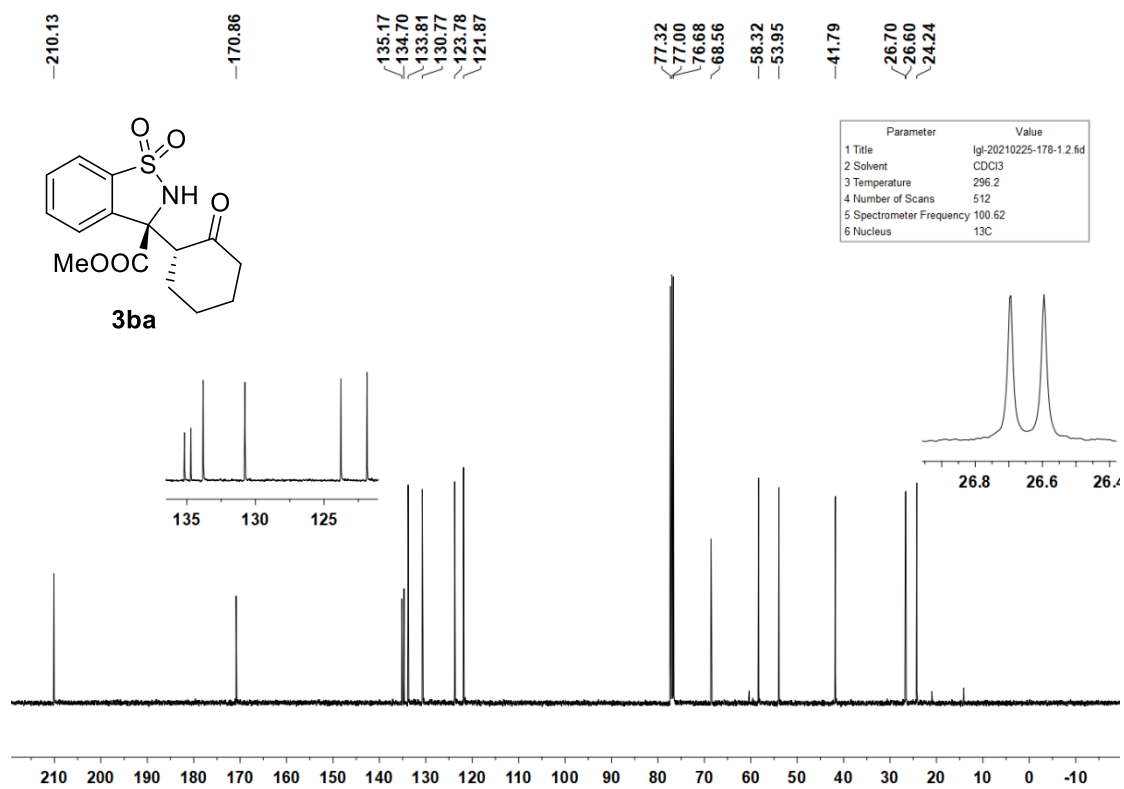

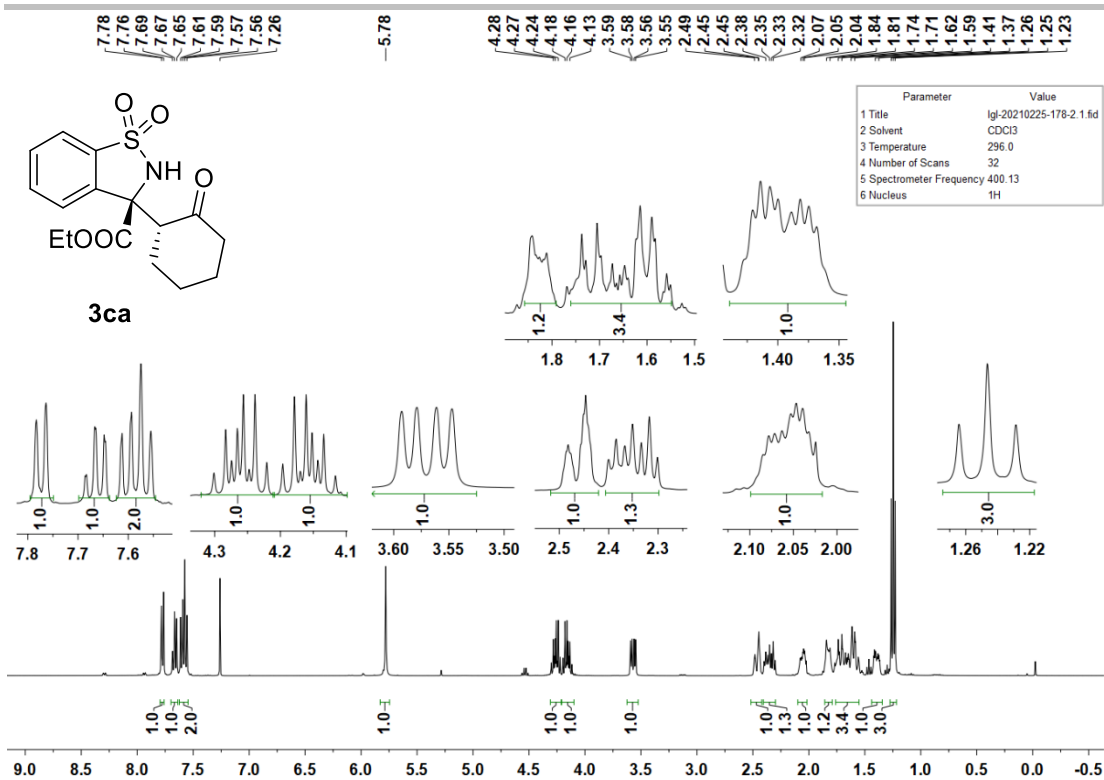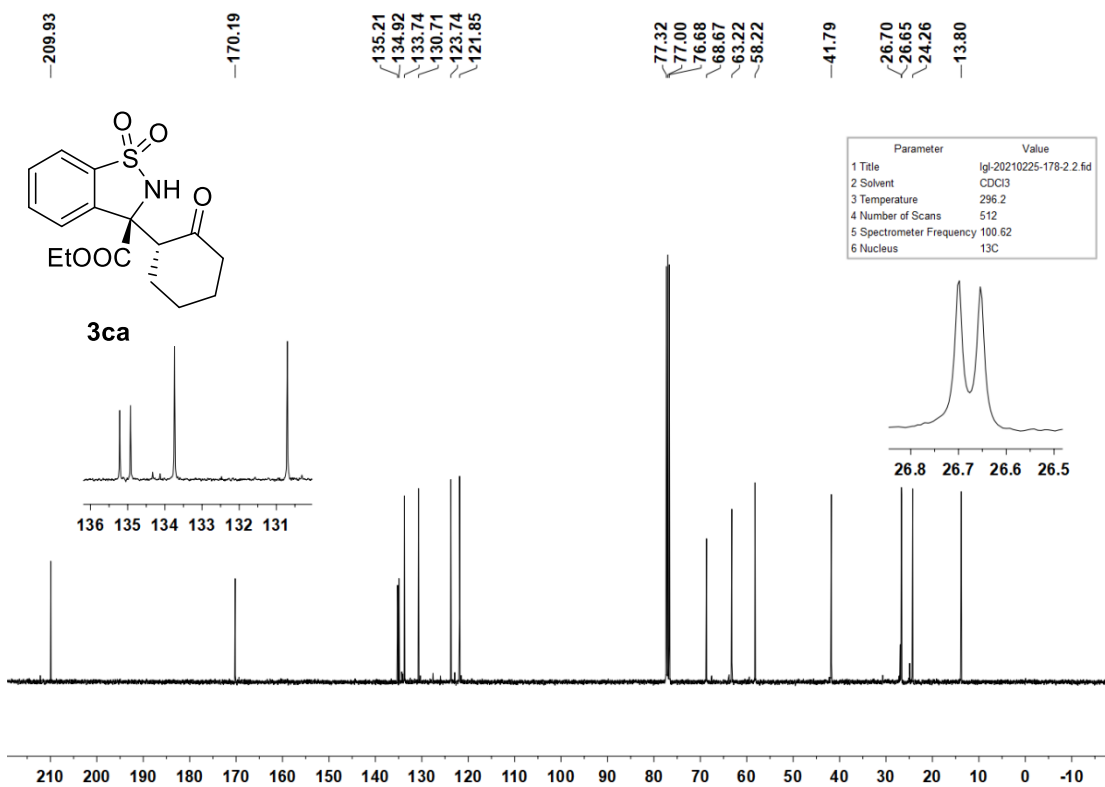





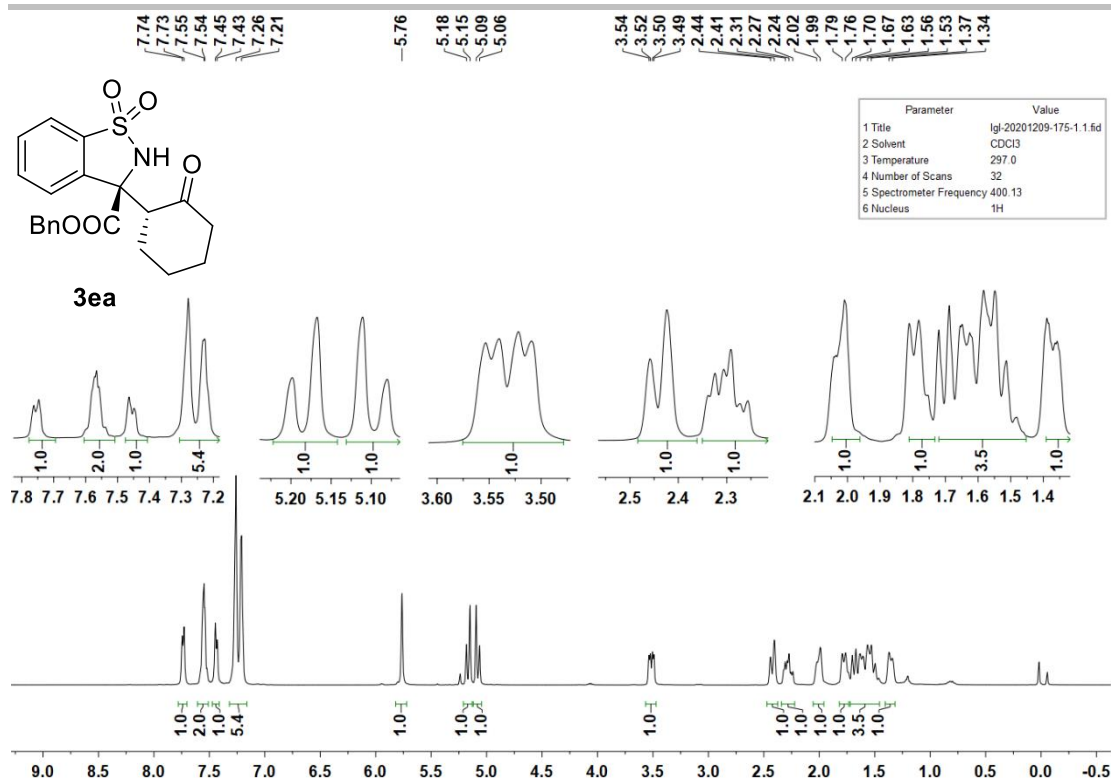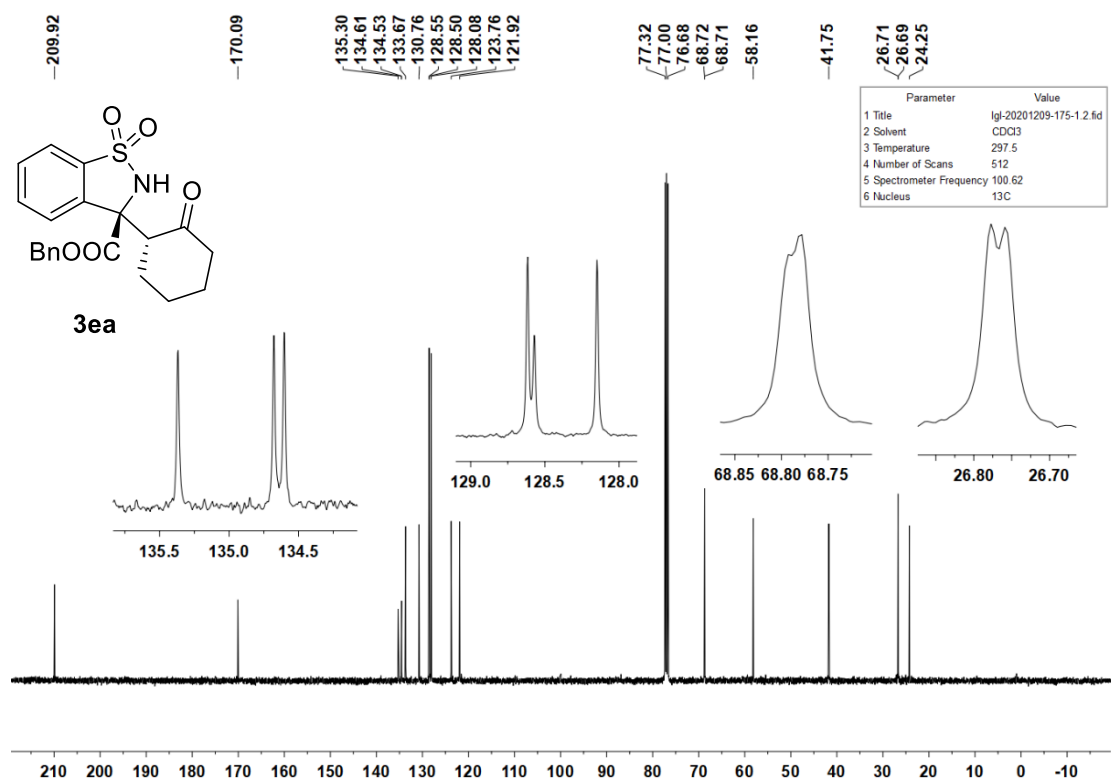

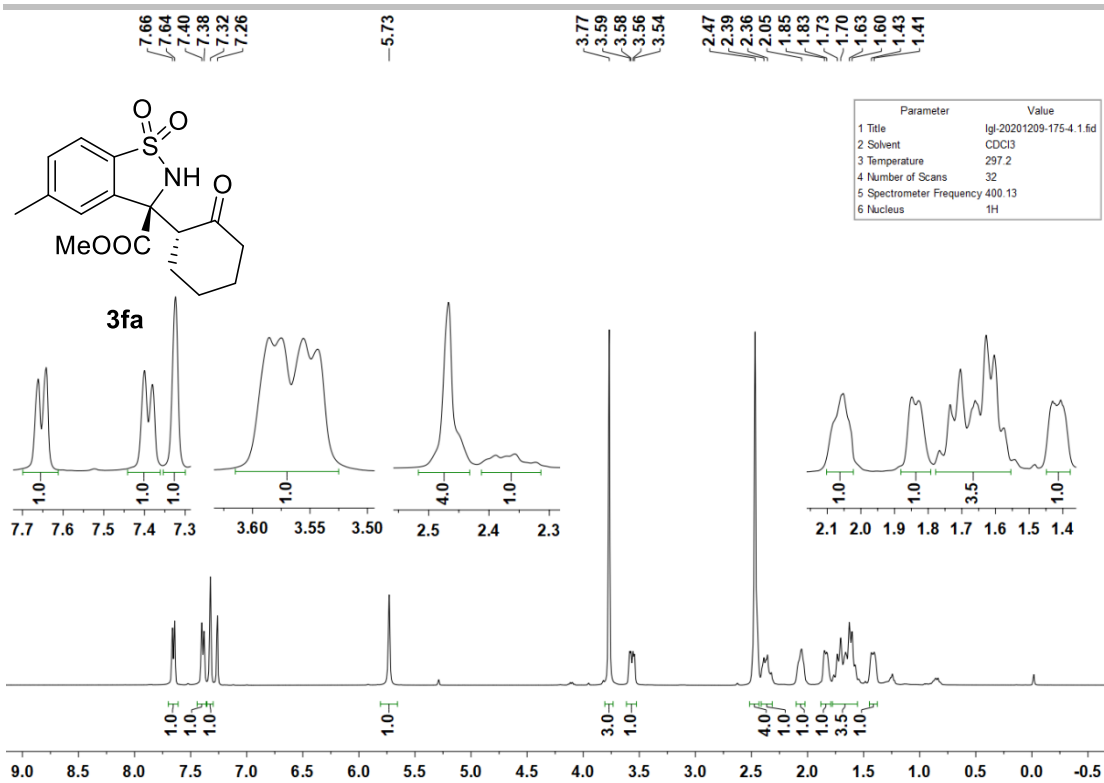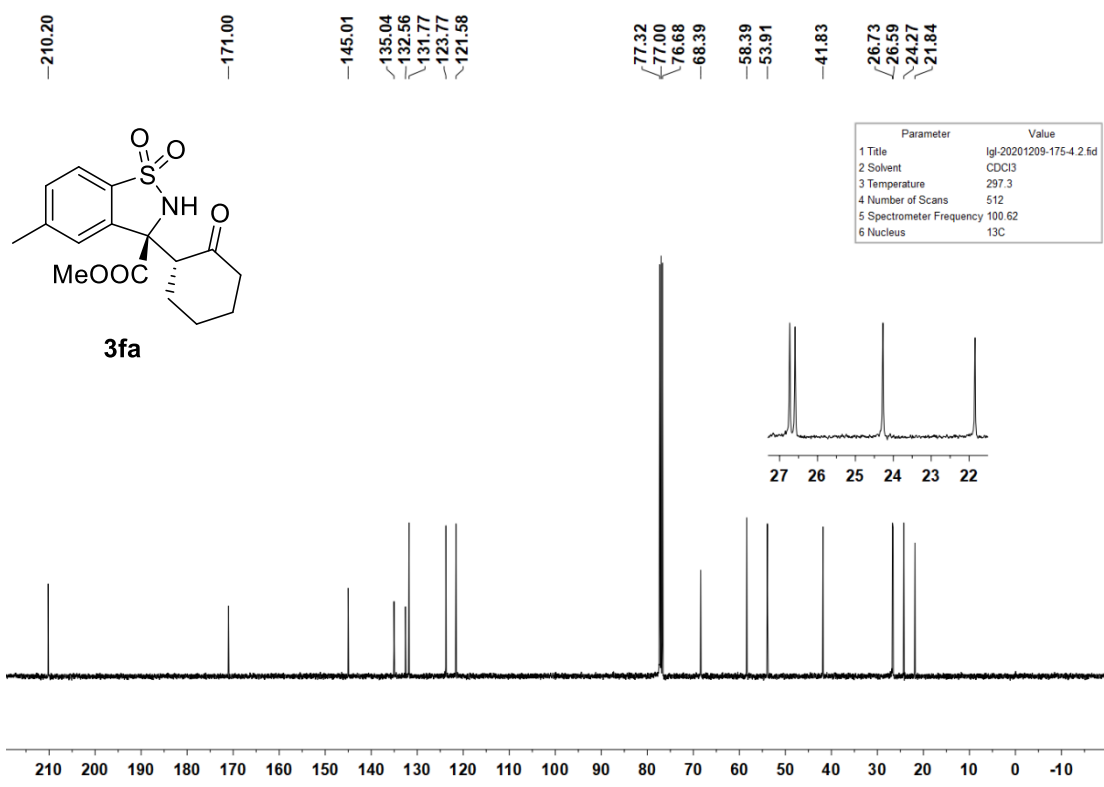

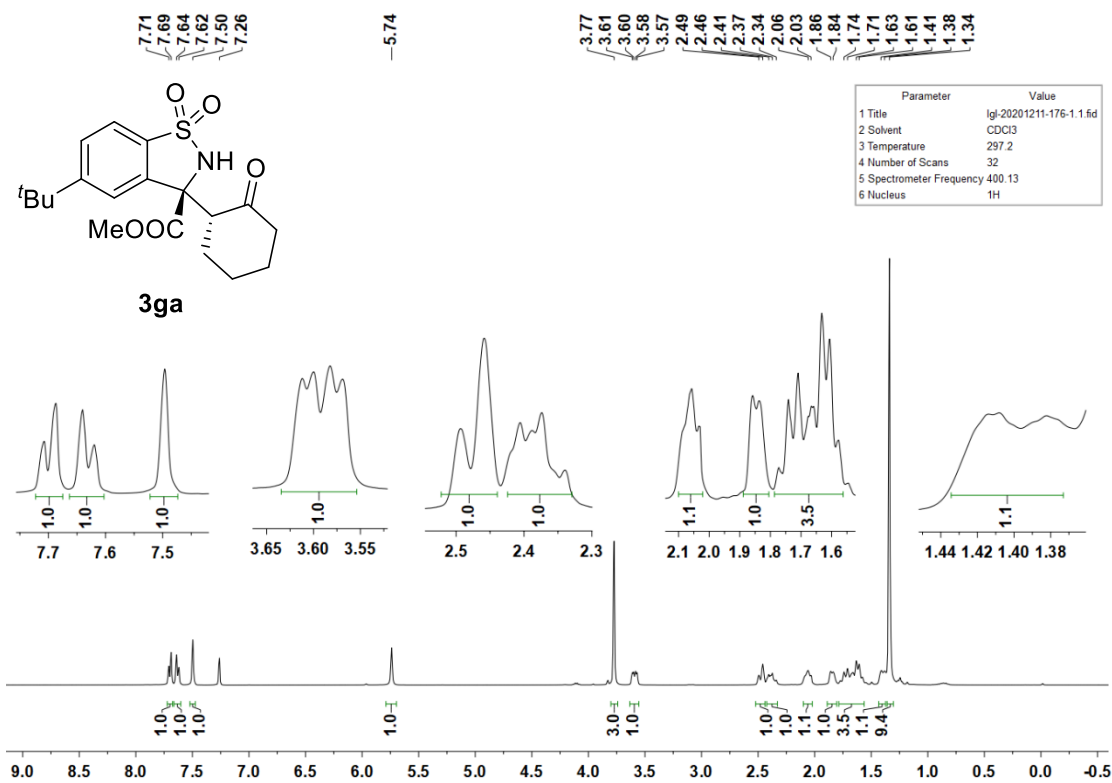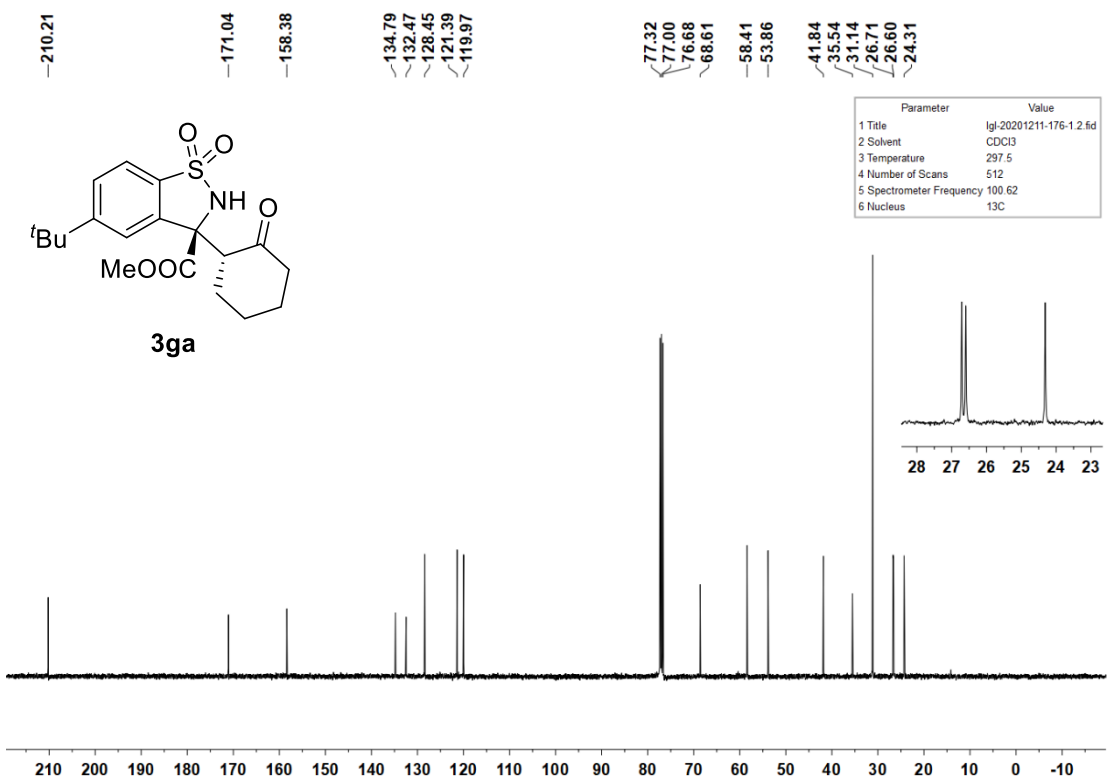

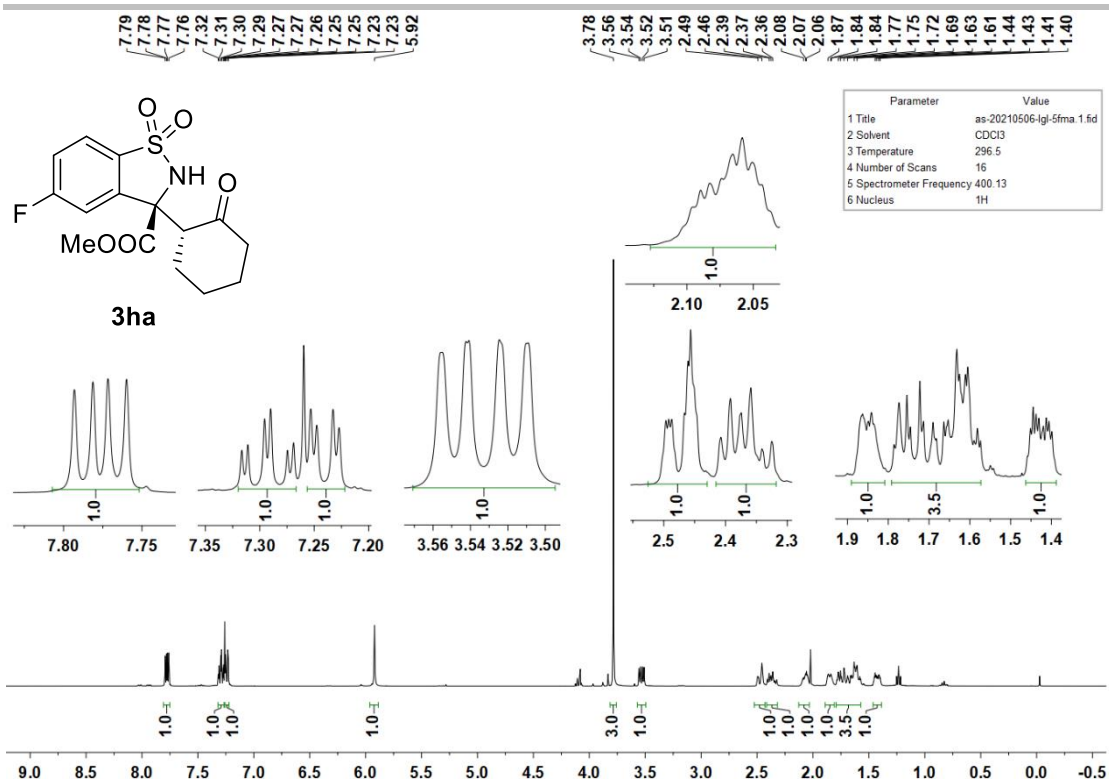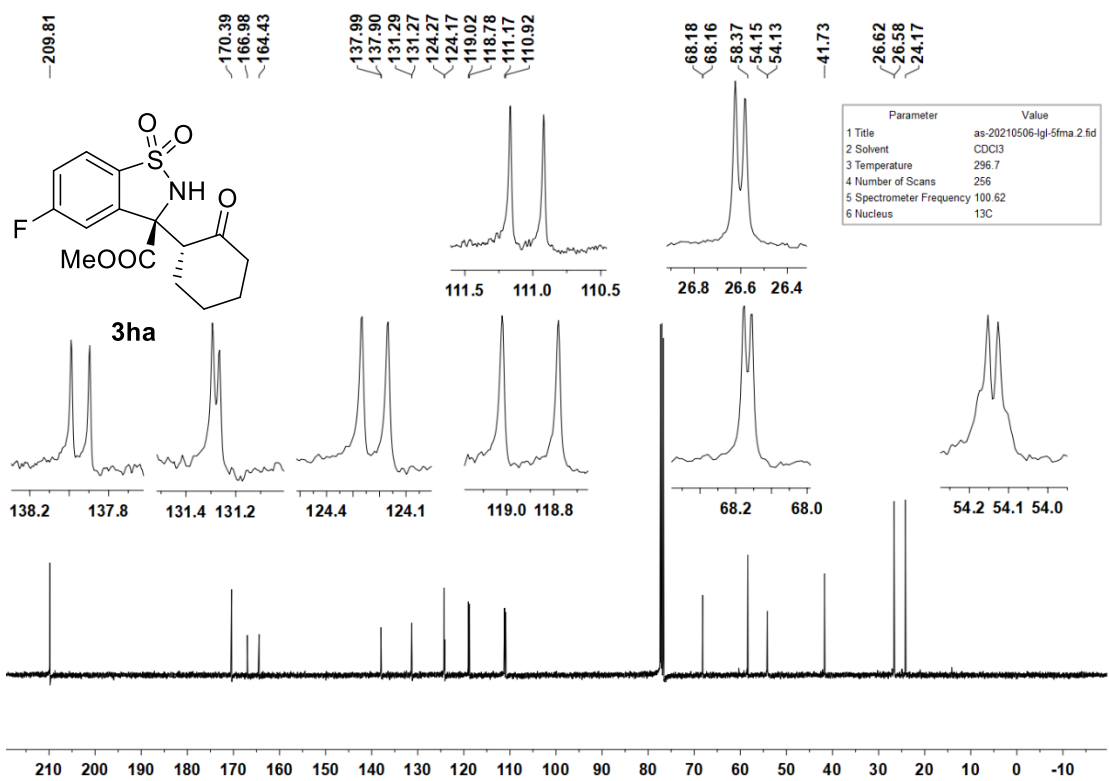

-102.58

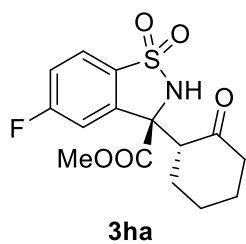

| Parameter                | Value                      |
|--------------------------|----------------------------|
| 1 Title                  | as-20210506-igl-5fma.3.fid |
| 2 Solvent                | CDCl <sub>3</sub>          |
| 3 Temperature            | 296.6                      |
| 4 Number of Scans        | 16                         |
| 5 Spectrometer Frequency | 376.46                     |
| 6 Nucleus                | 19F                        |

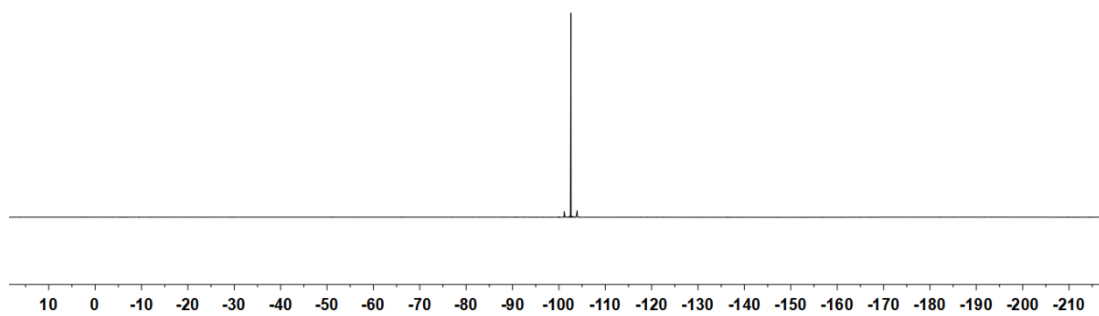

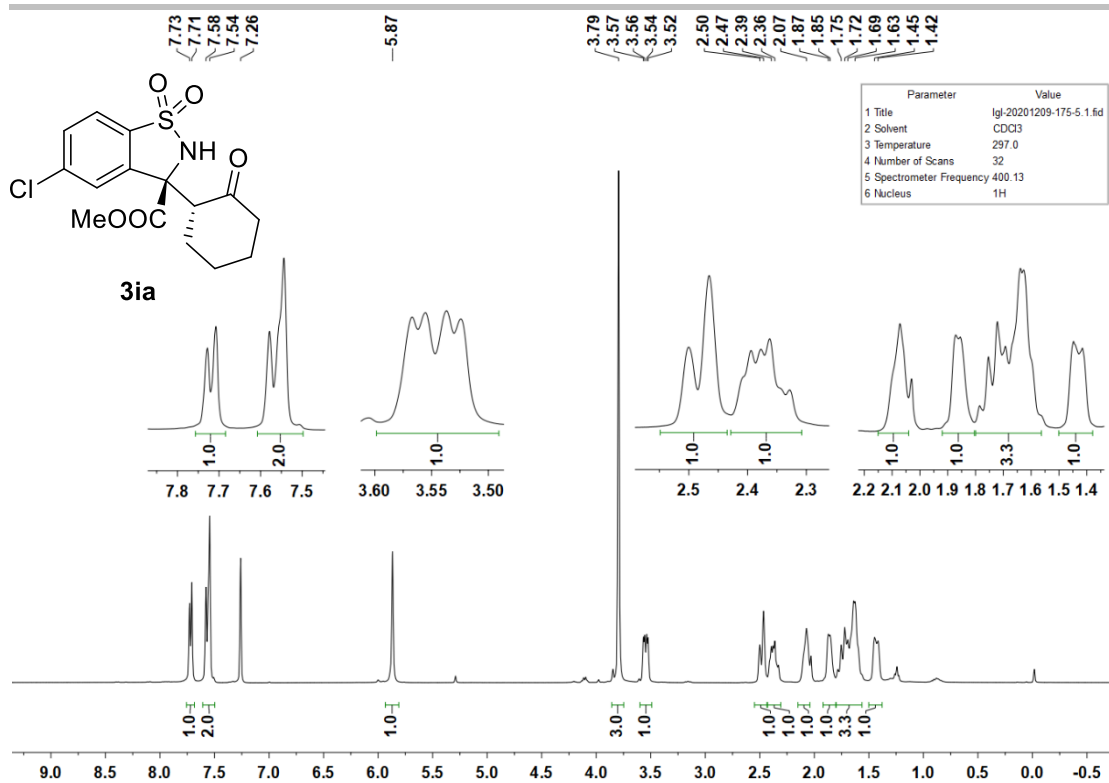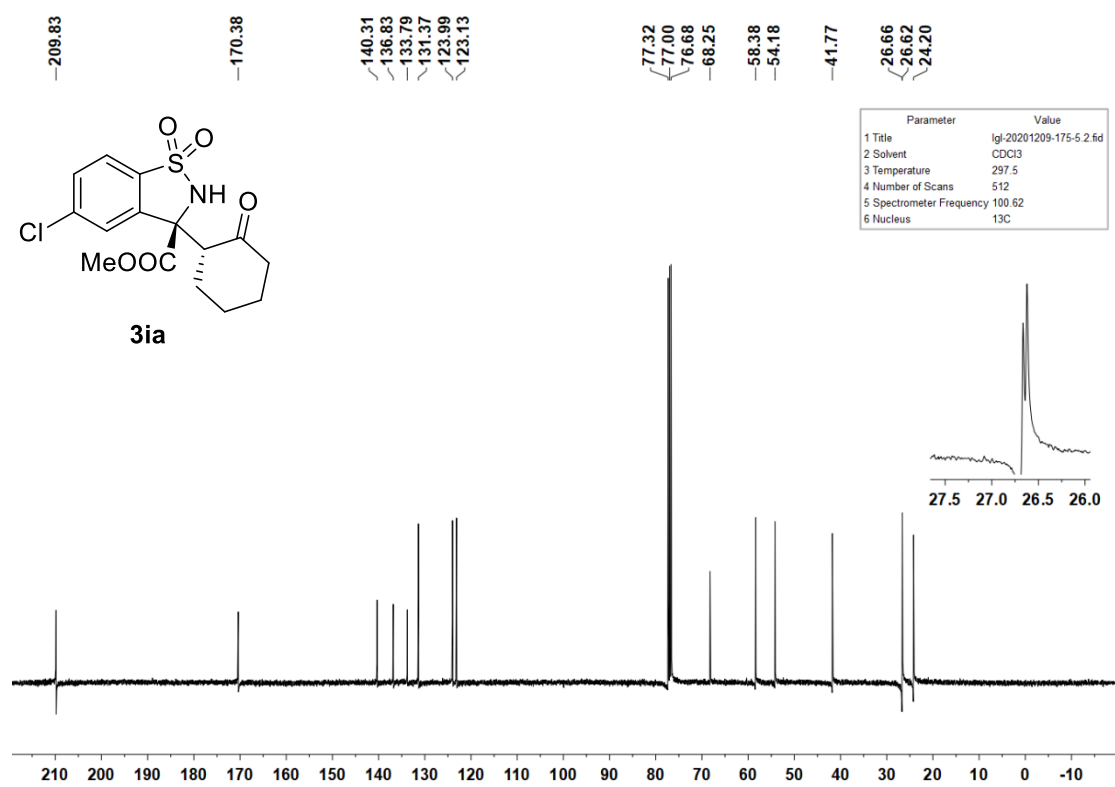

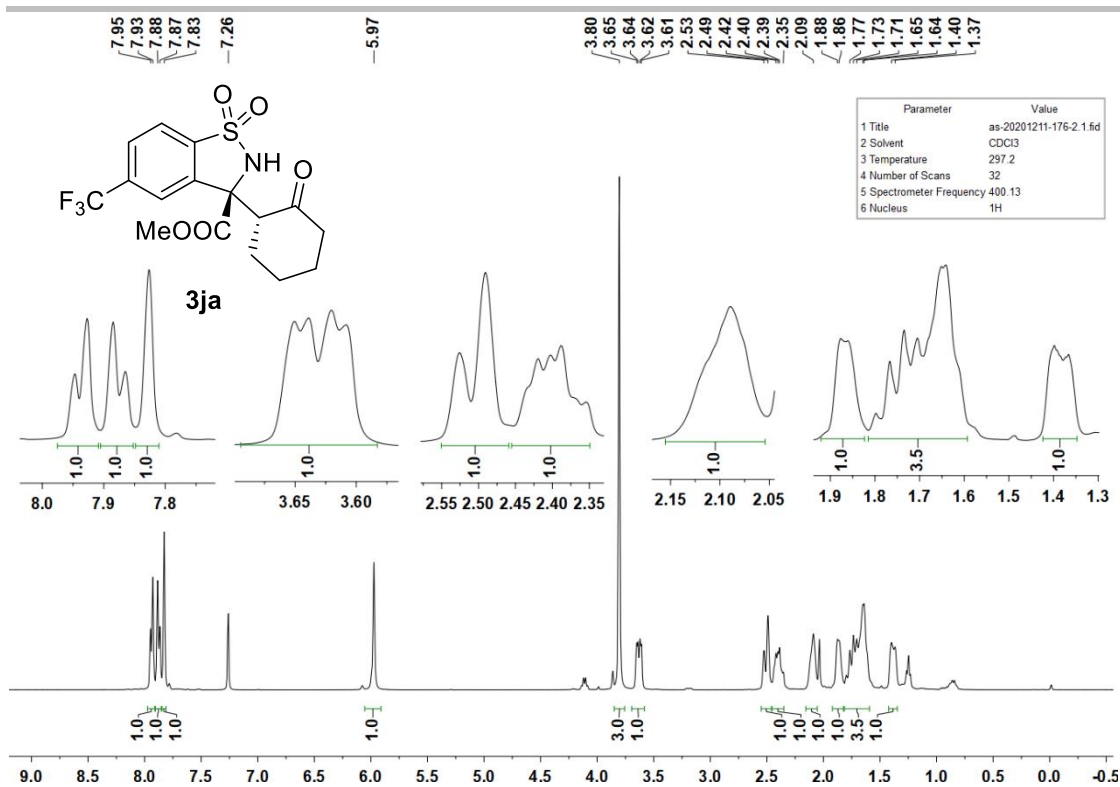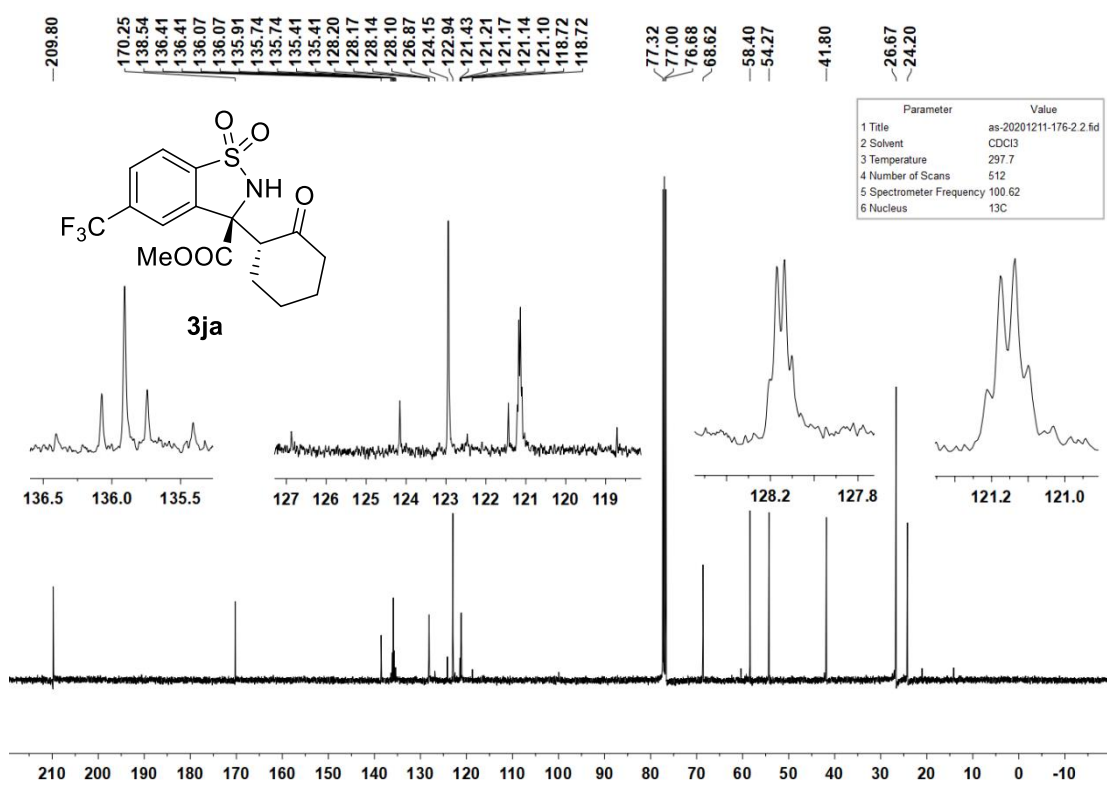



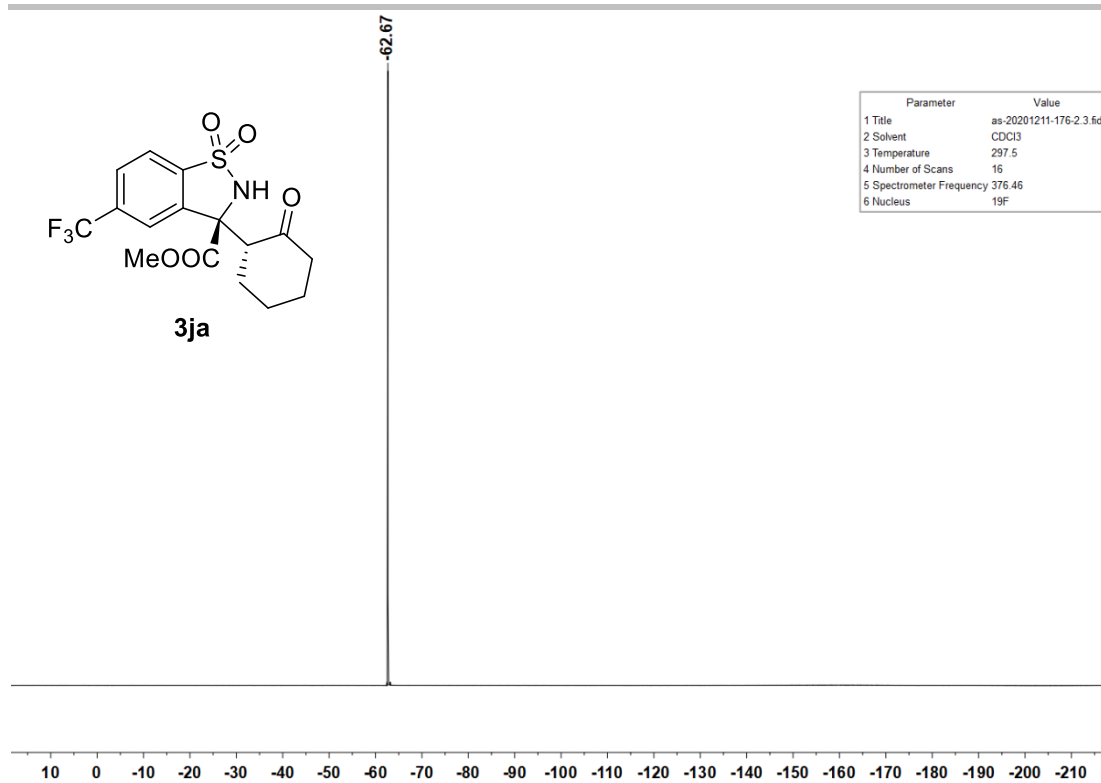

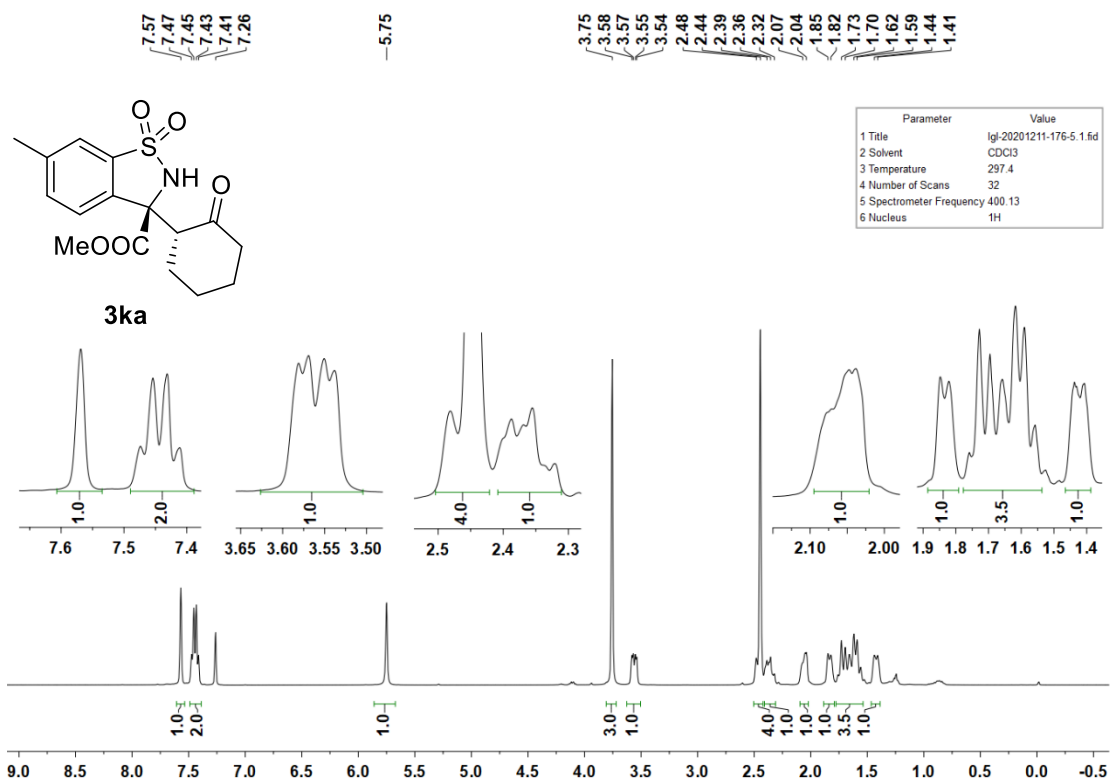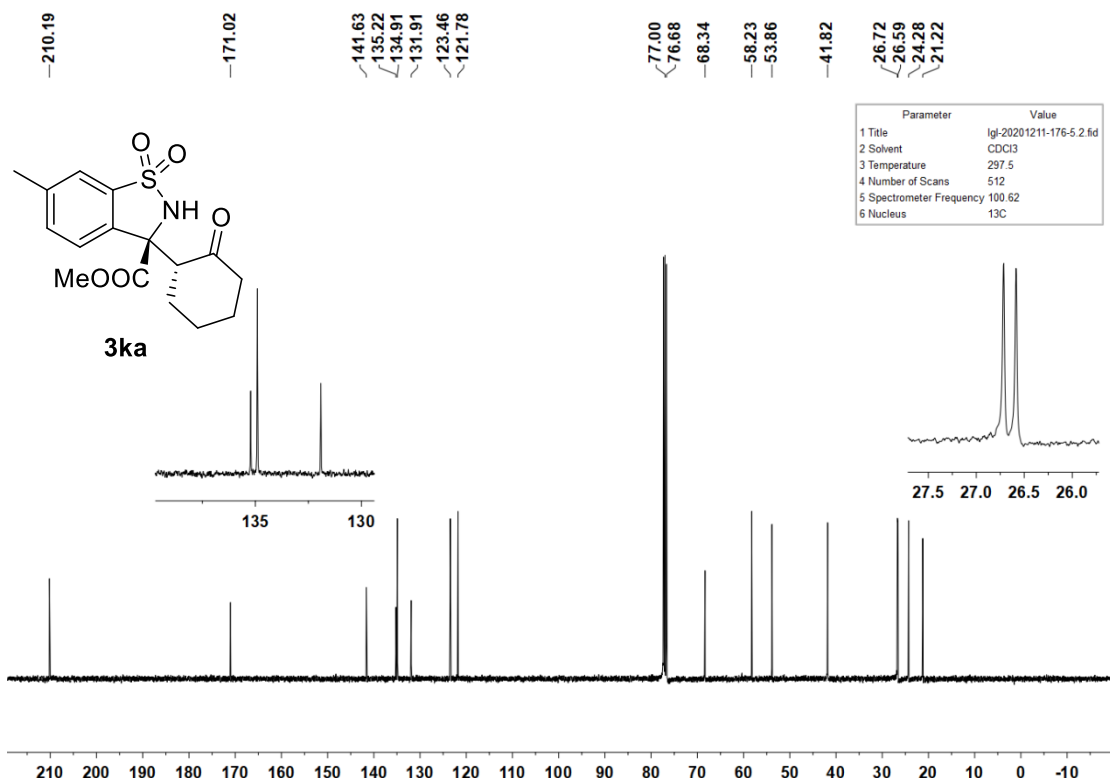



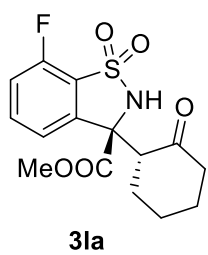

| Parameter                | Value                       |
|--------------------------|-----------------------------|
| 1 Title                  | as-20210315-igl-28-3.9.1.1r |
| 2 Solvent                | CDCl3                       |
| 3 Temperature            | 298.1                       |
| 4 Number of Scans        | 16                          |
| 5 Spectrometer Frequency | 564.72                      |
| 6 Nucleus                | 19F                         |

-113.88

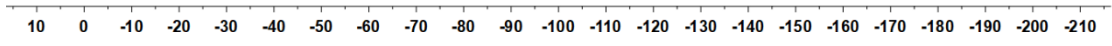

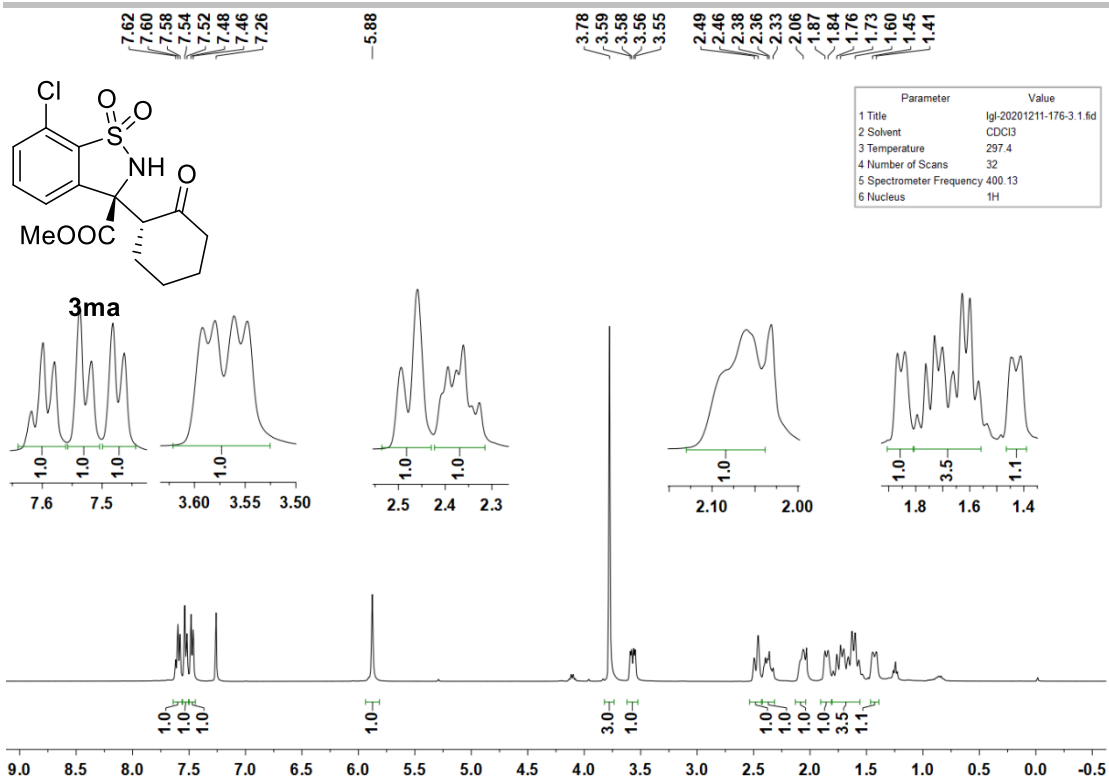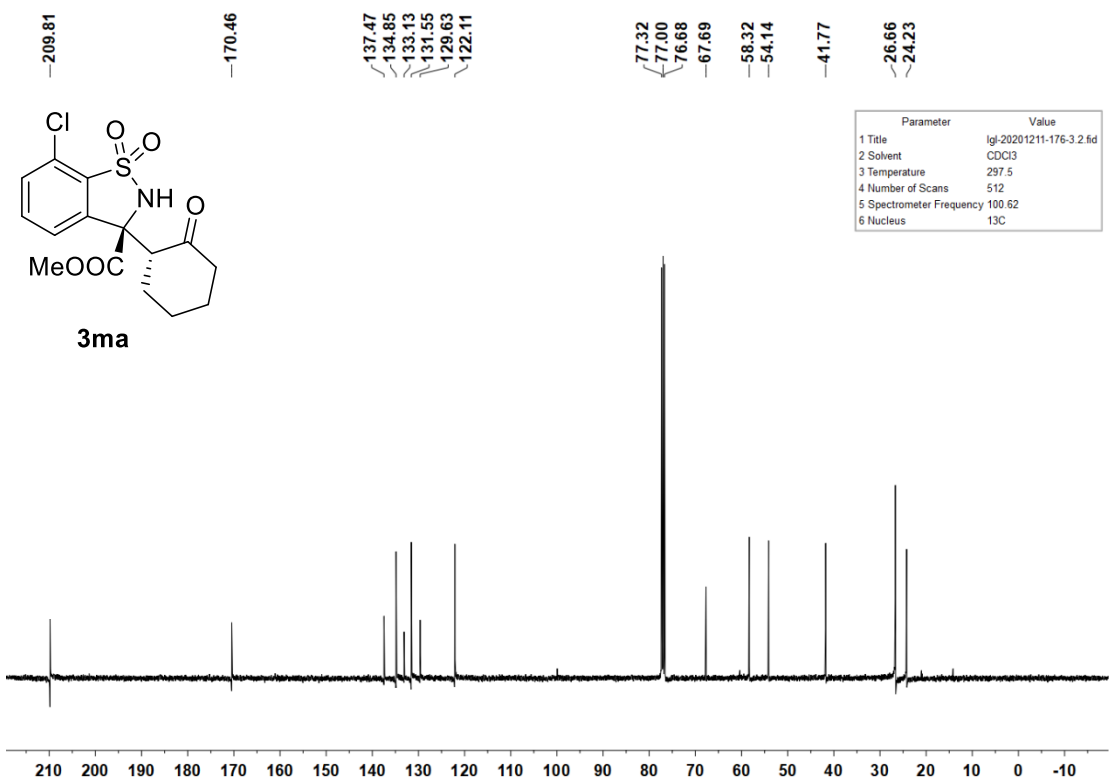

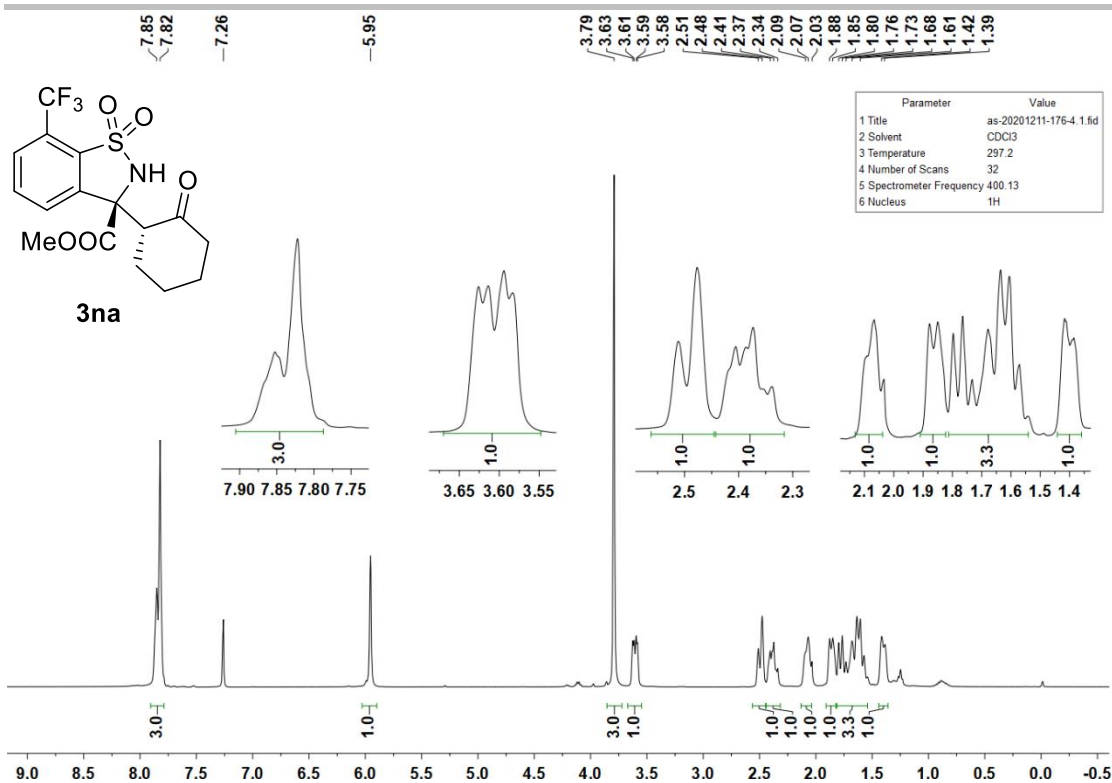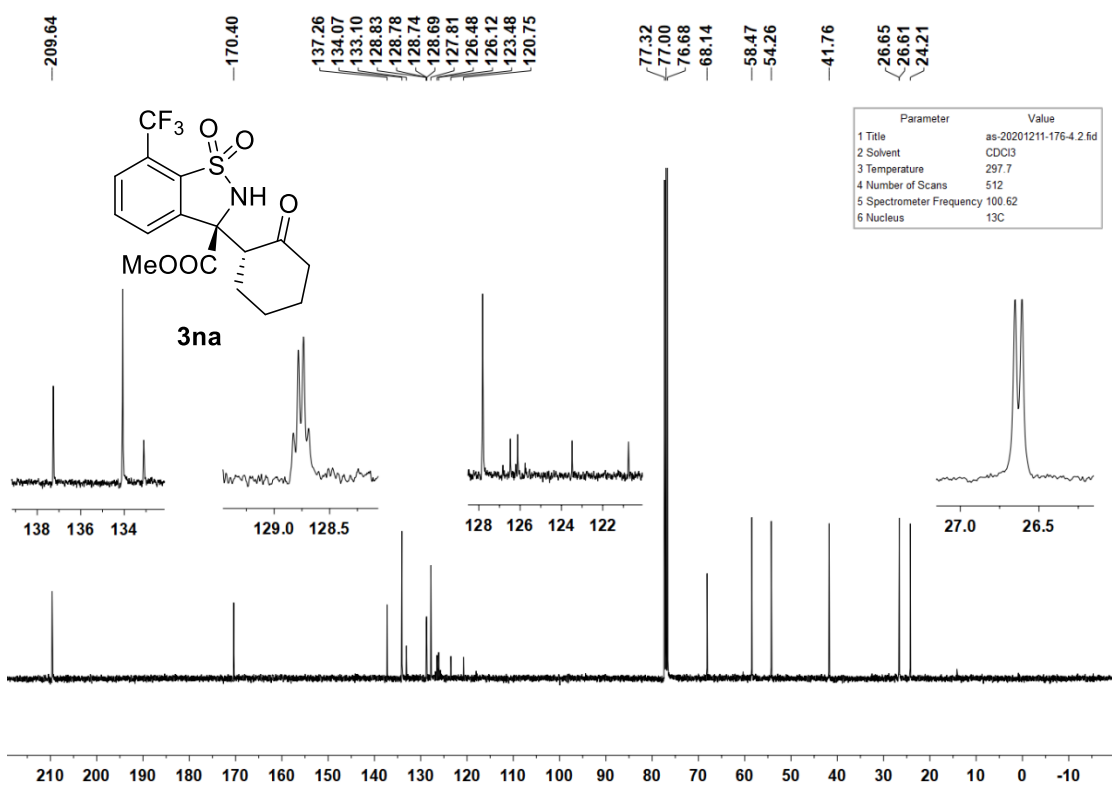

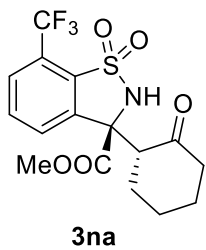

-59.49

| Parameter                | Value                   |
|--------------------------|-------------------------|
| 1 Title                  | as-20201211-176-4.3.fid |
| 2 Solvent                | CDCl <sub>3</sub>       |
| 3 Temperature            | 297.5                   |
| 4 Number of Scans        | 16                      |
| 5 Spectrometer Frequency | 376.46                  |
| 6 Nucleus                | <sup>19</sup> F         |

10 0 -10 -20 -30 -40 -50 -60 -70 -80 -90 -100 -110 -120 -130 -140 -150 -160 -170 -180 -190 -200 -210

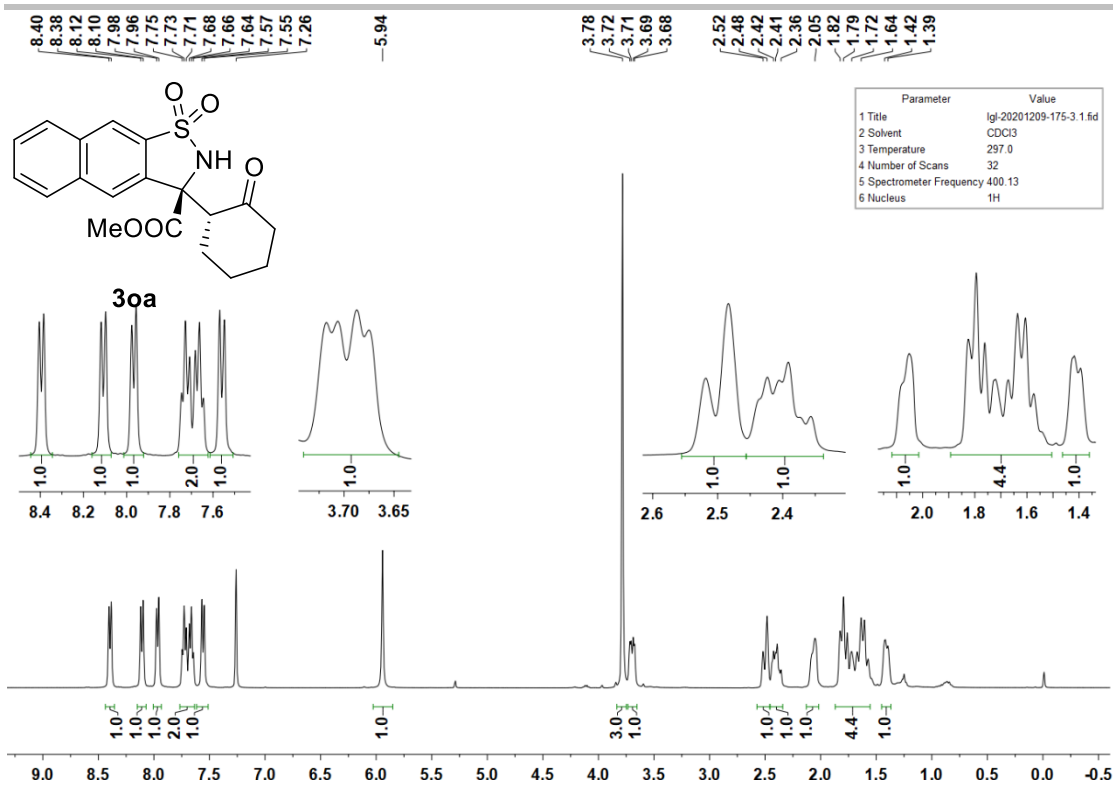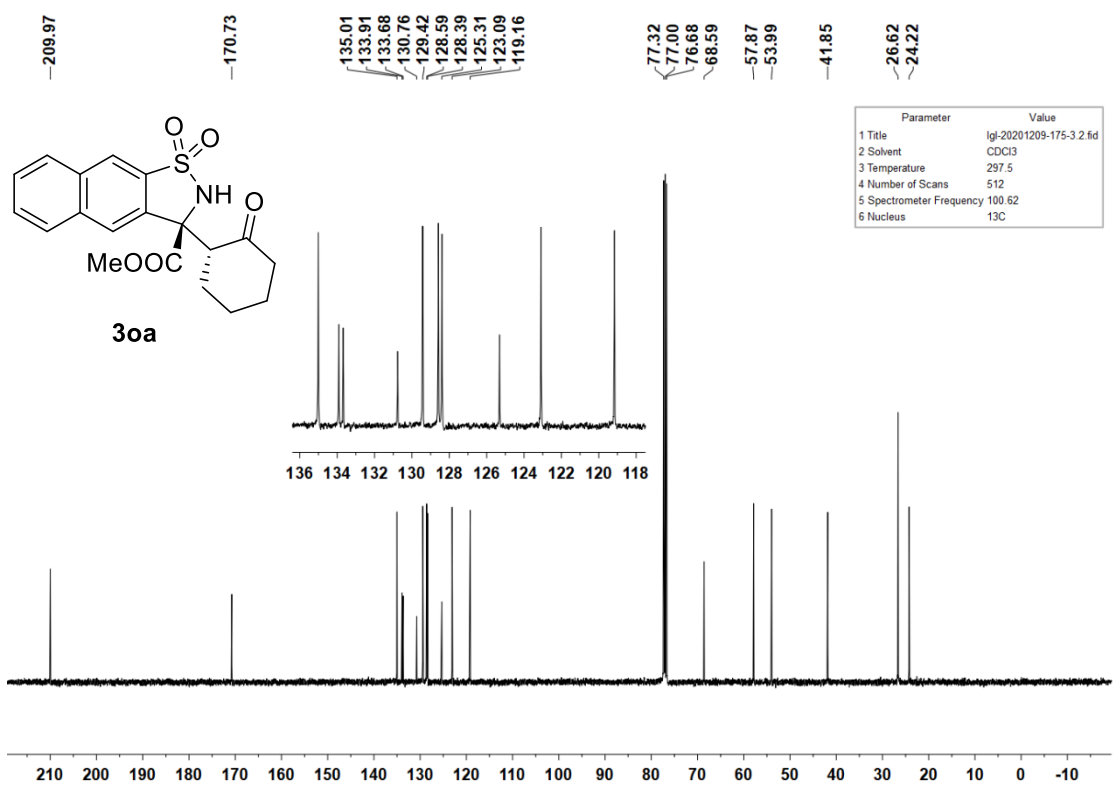



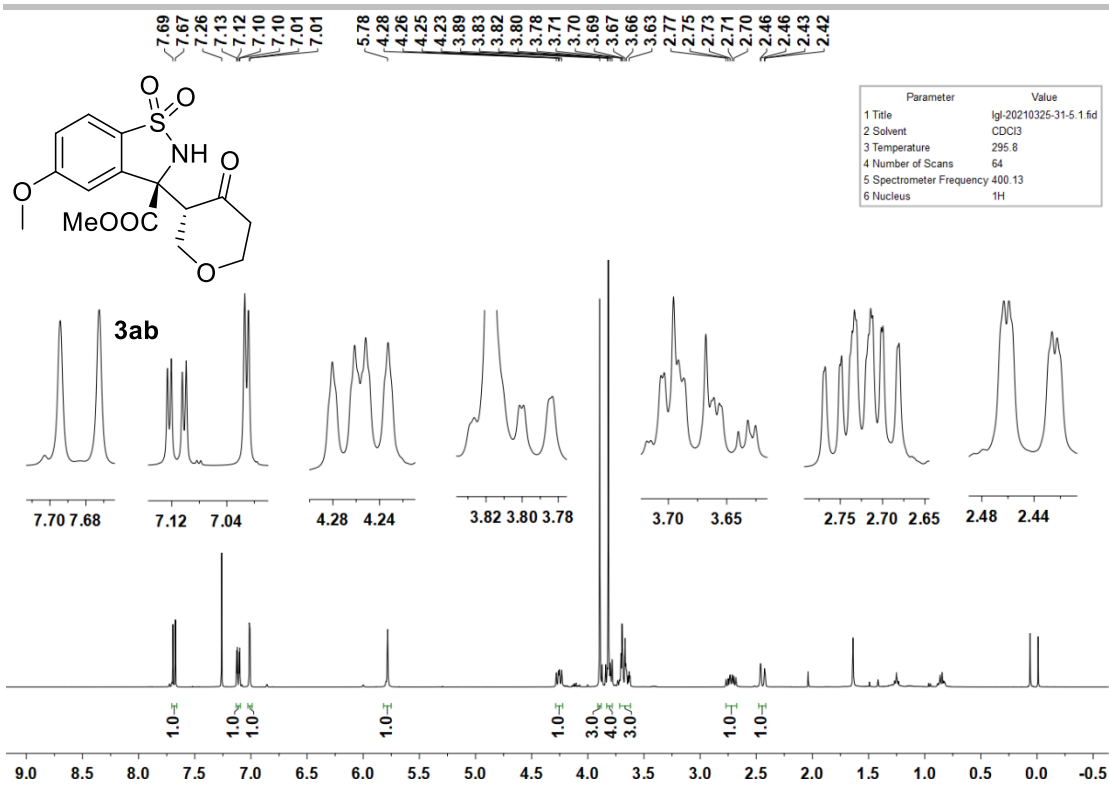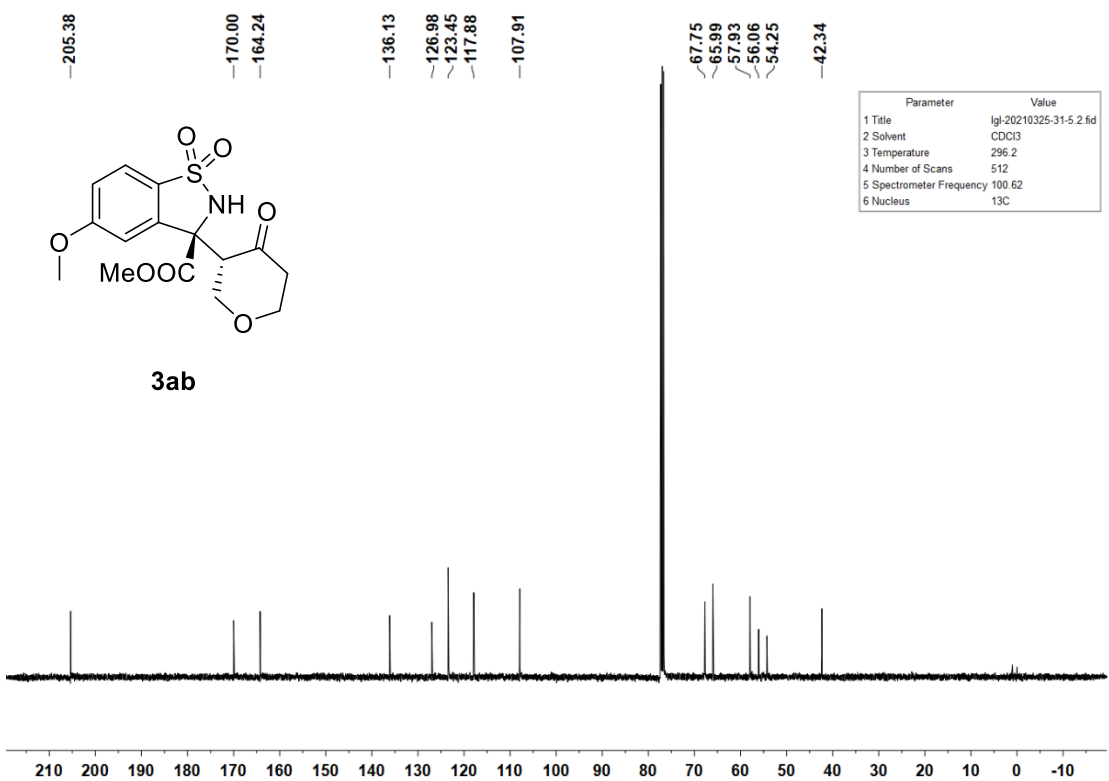

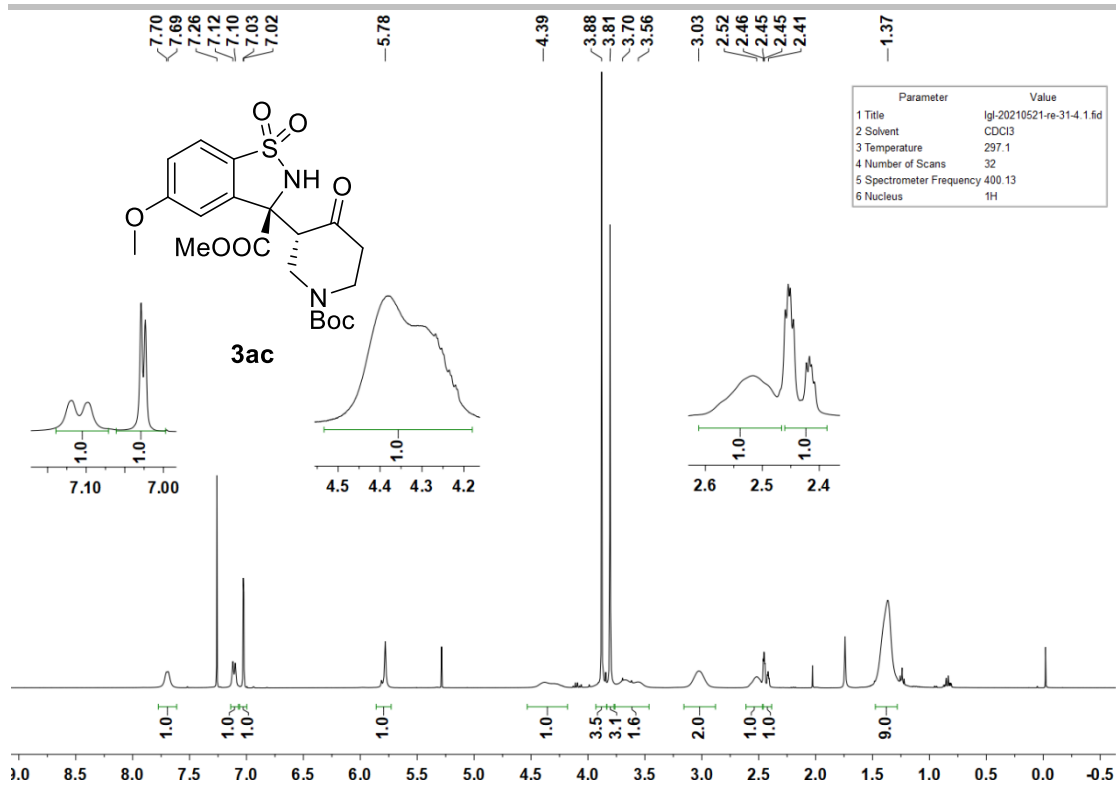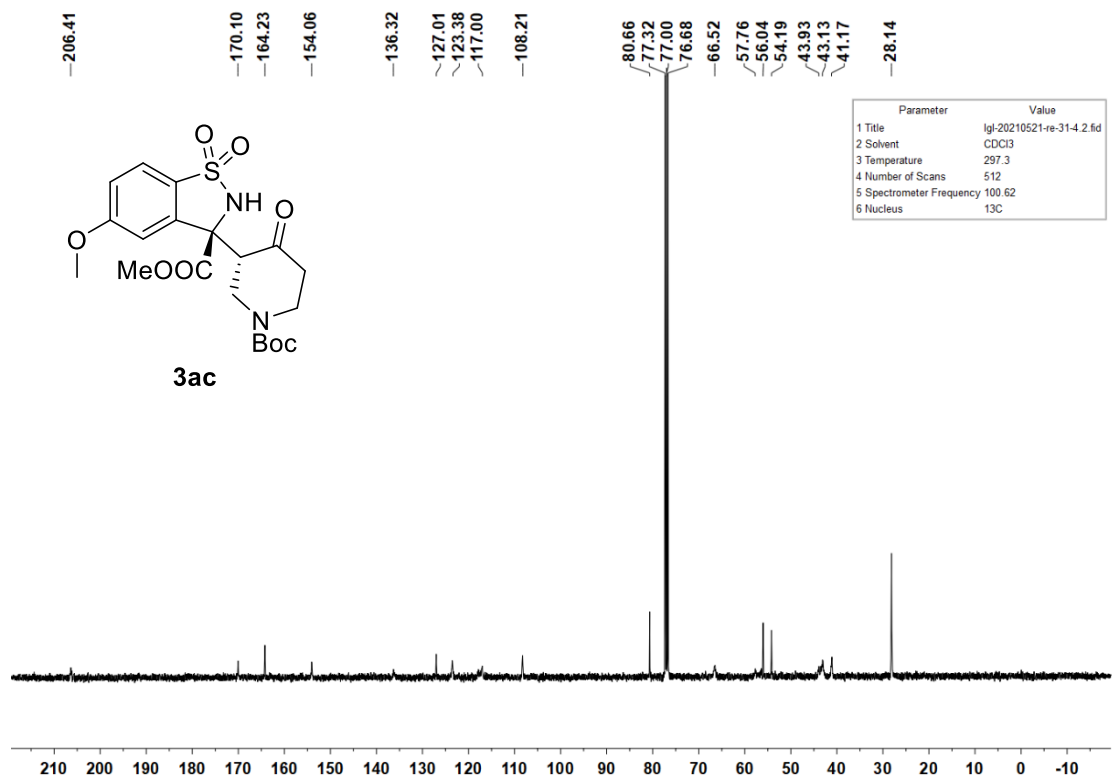

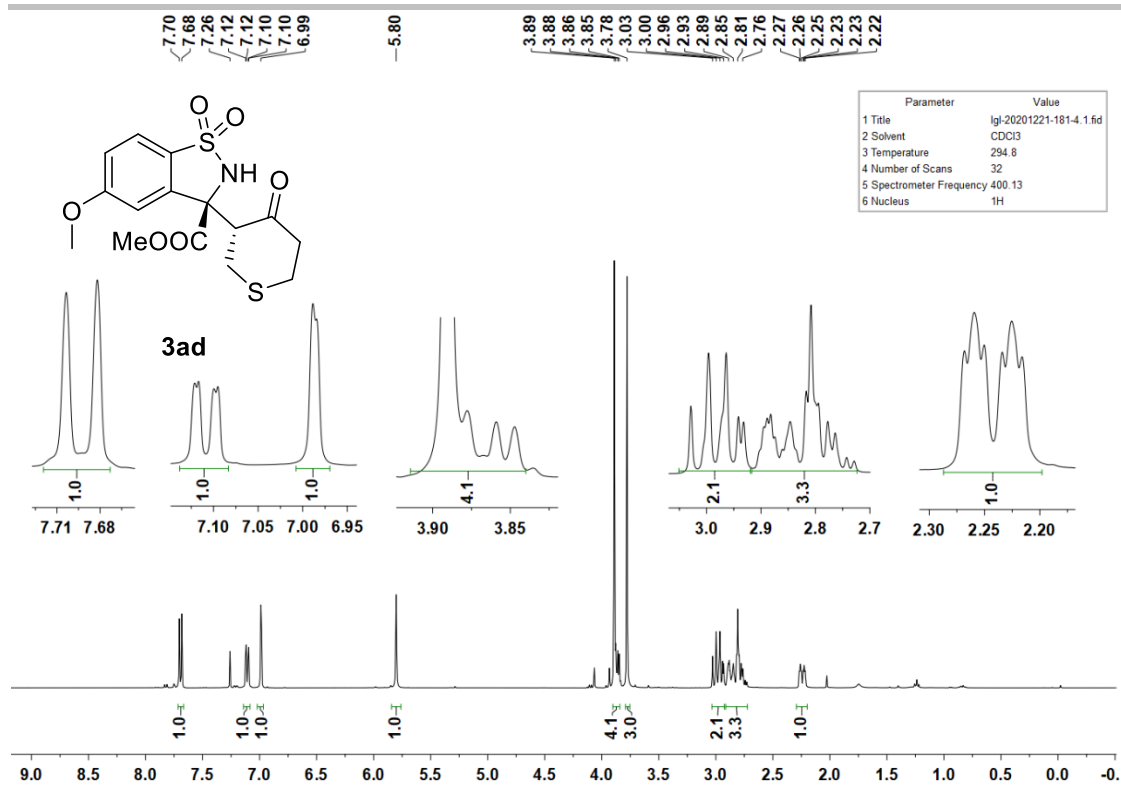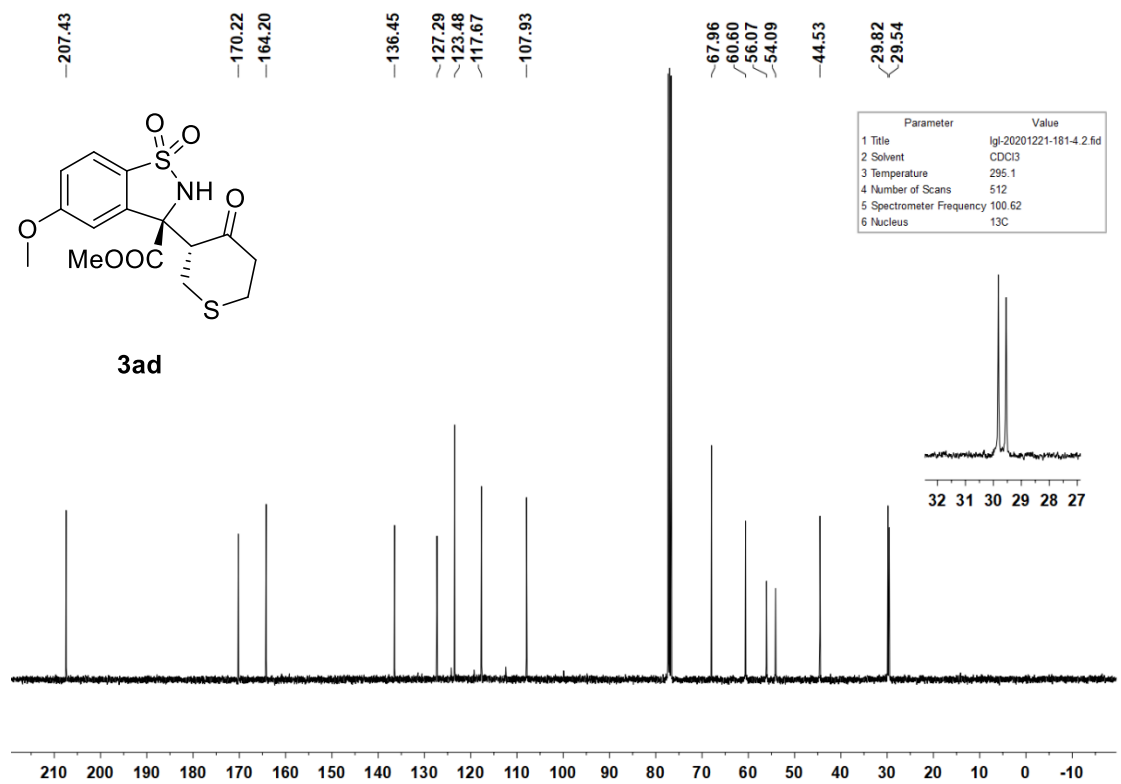

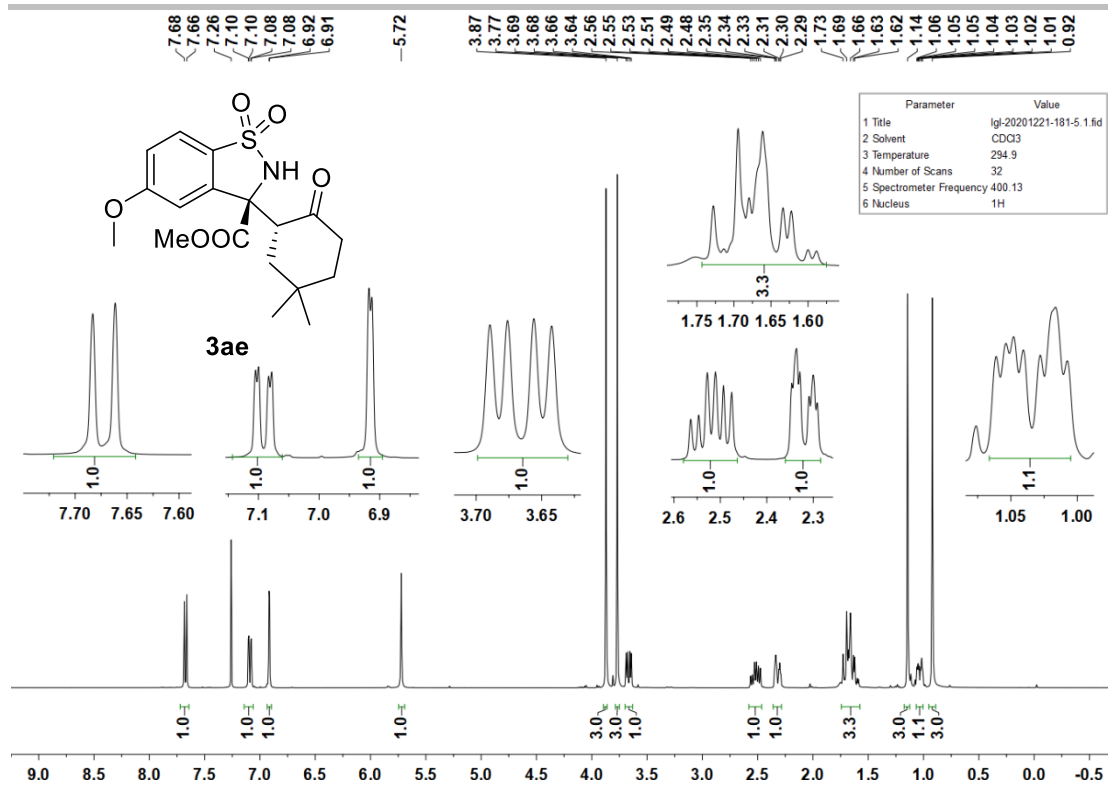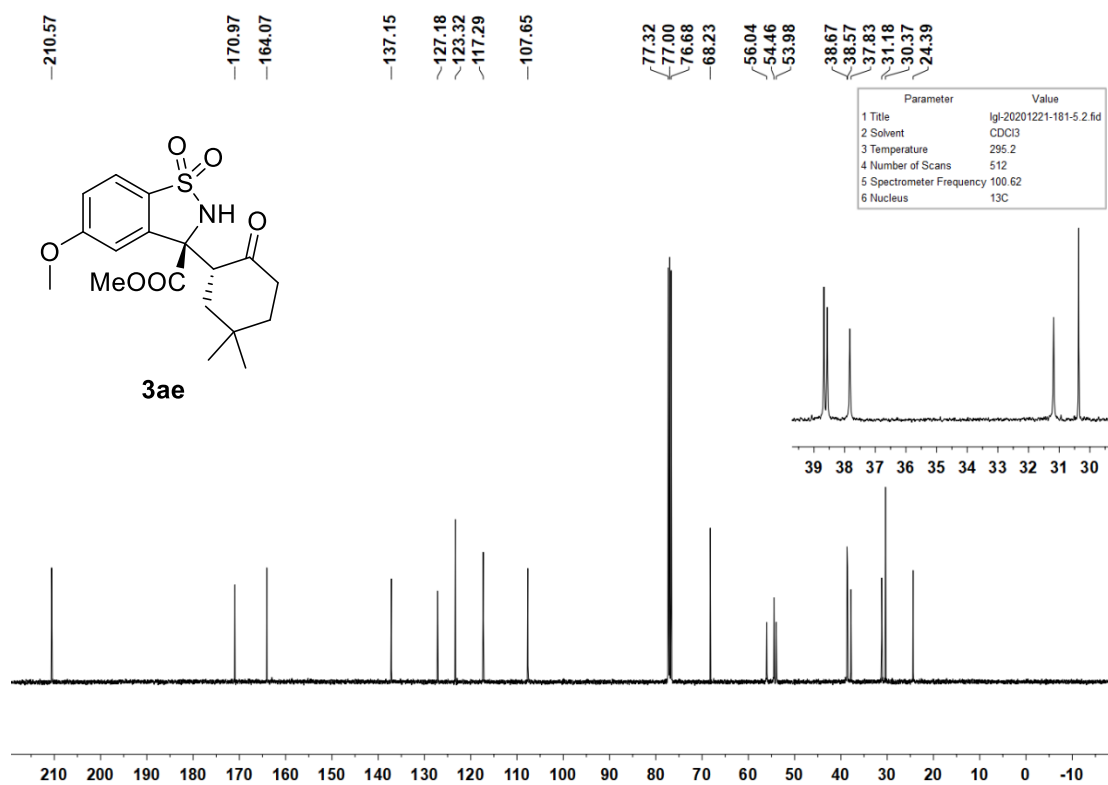

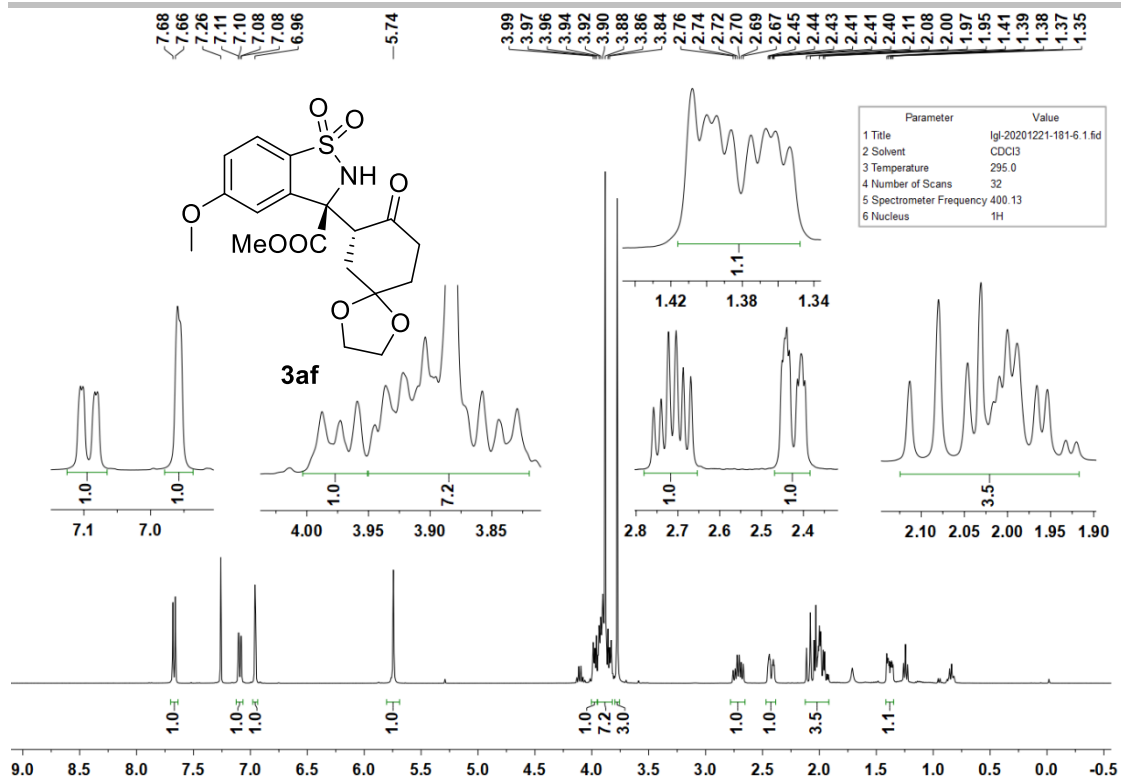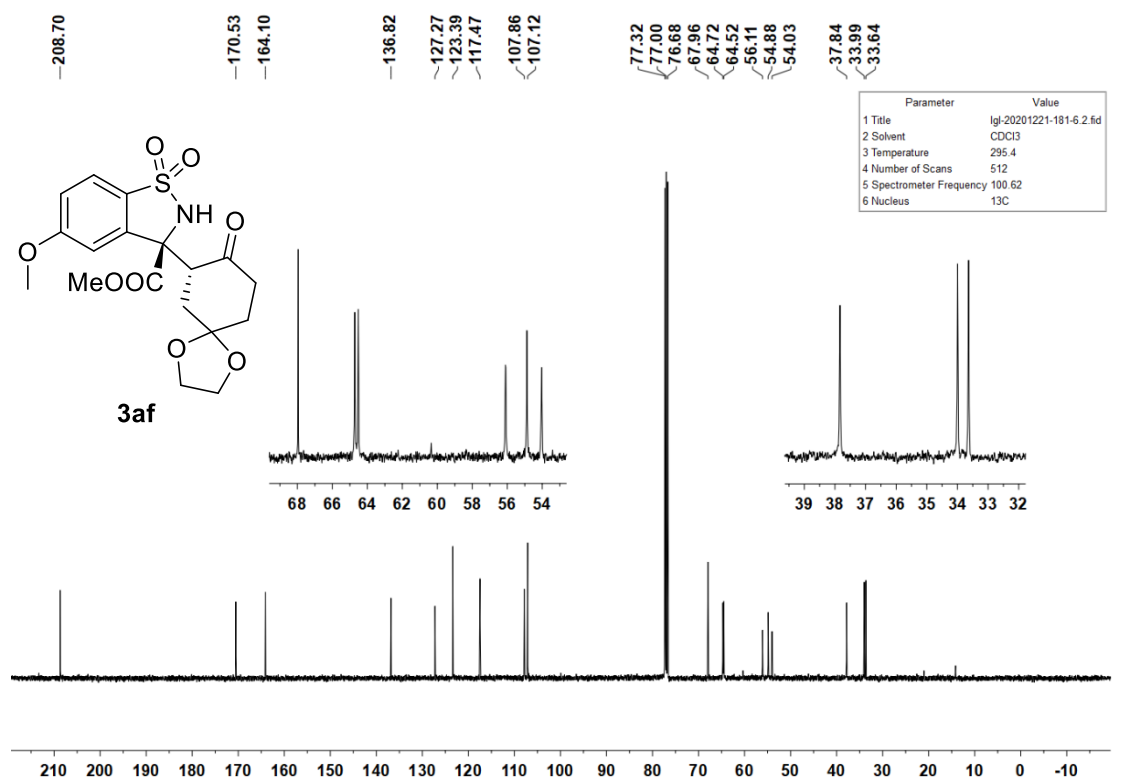

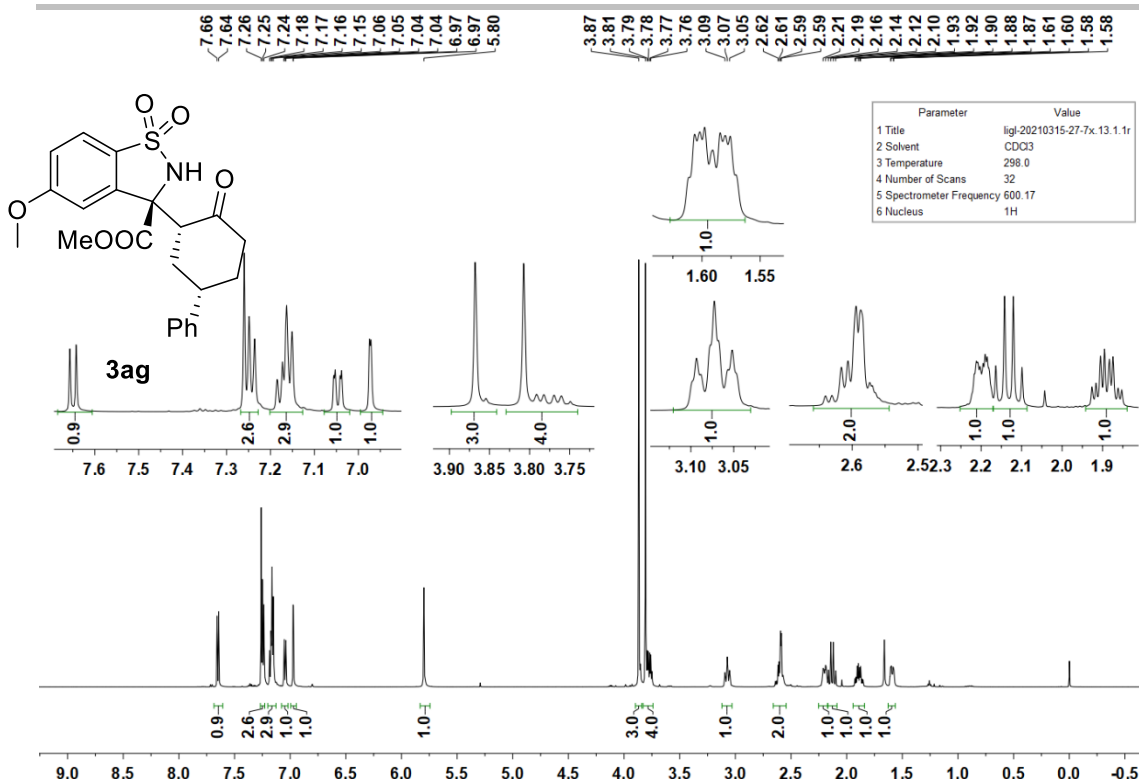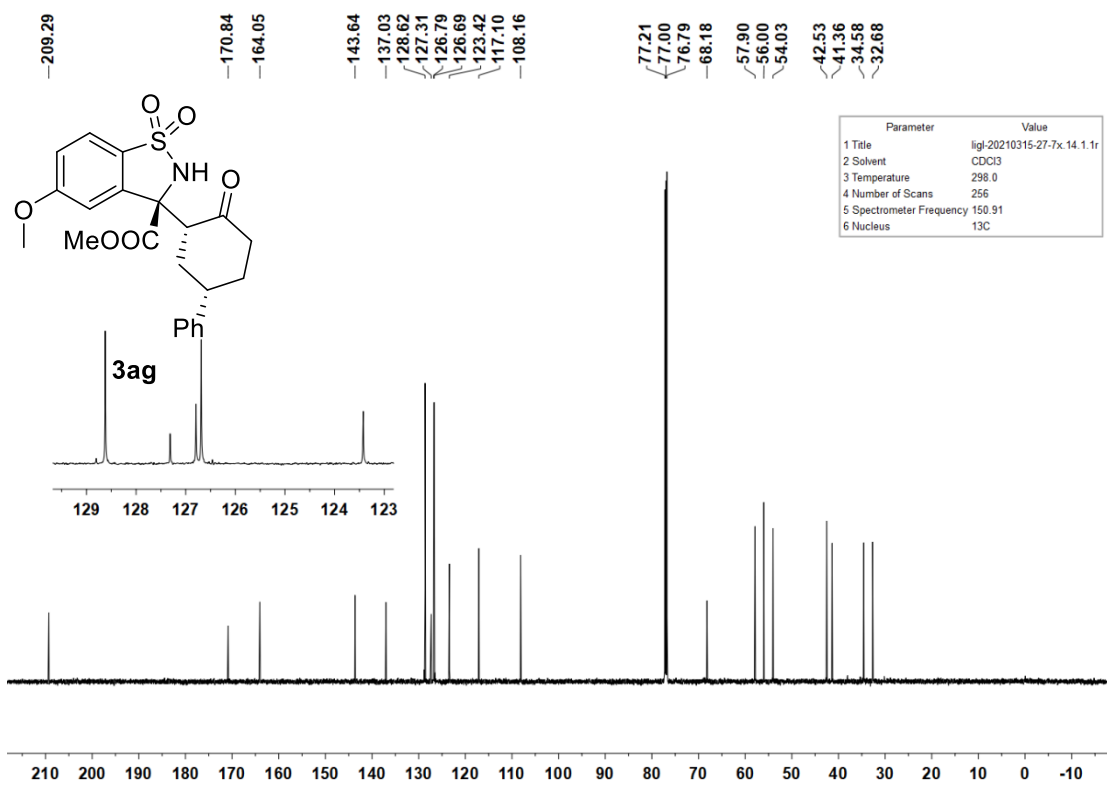

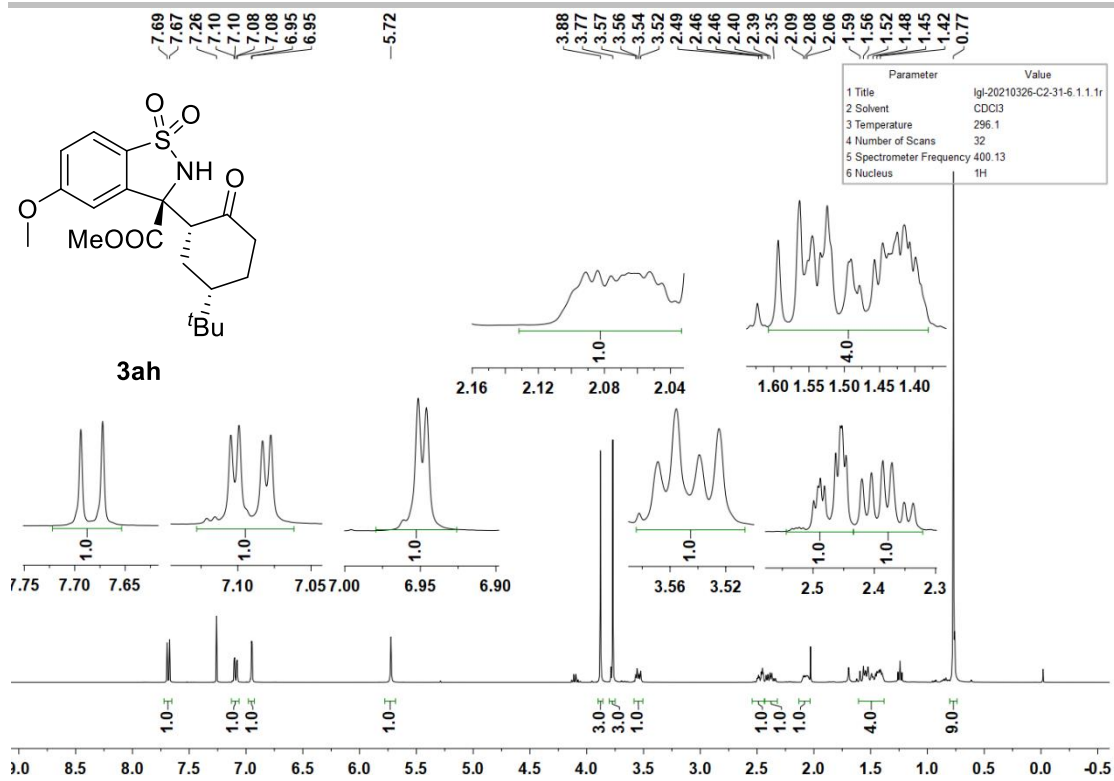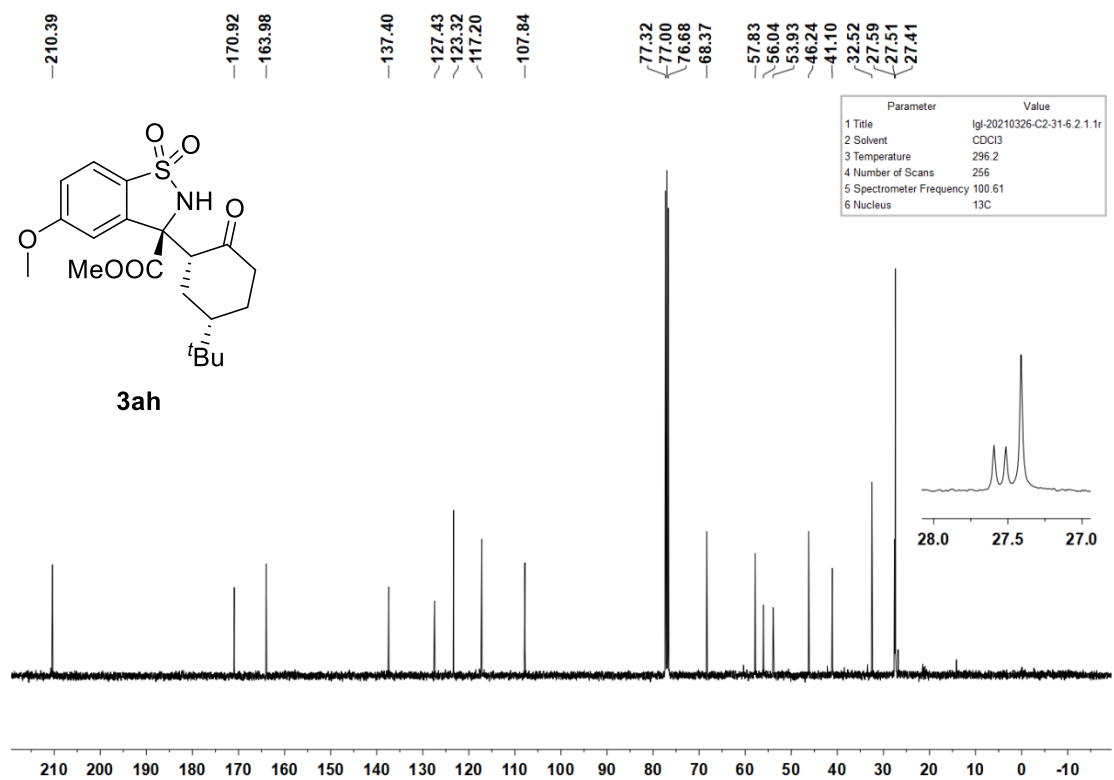

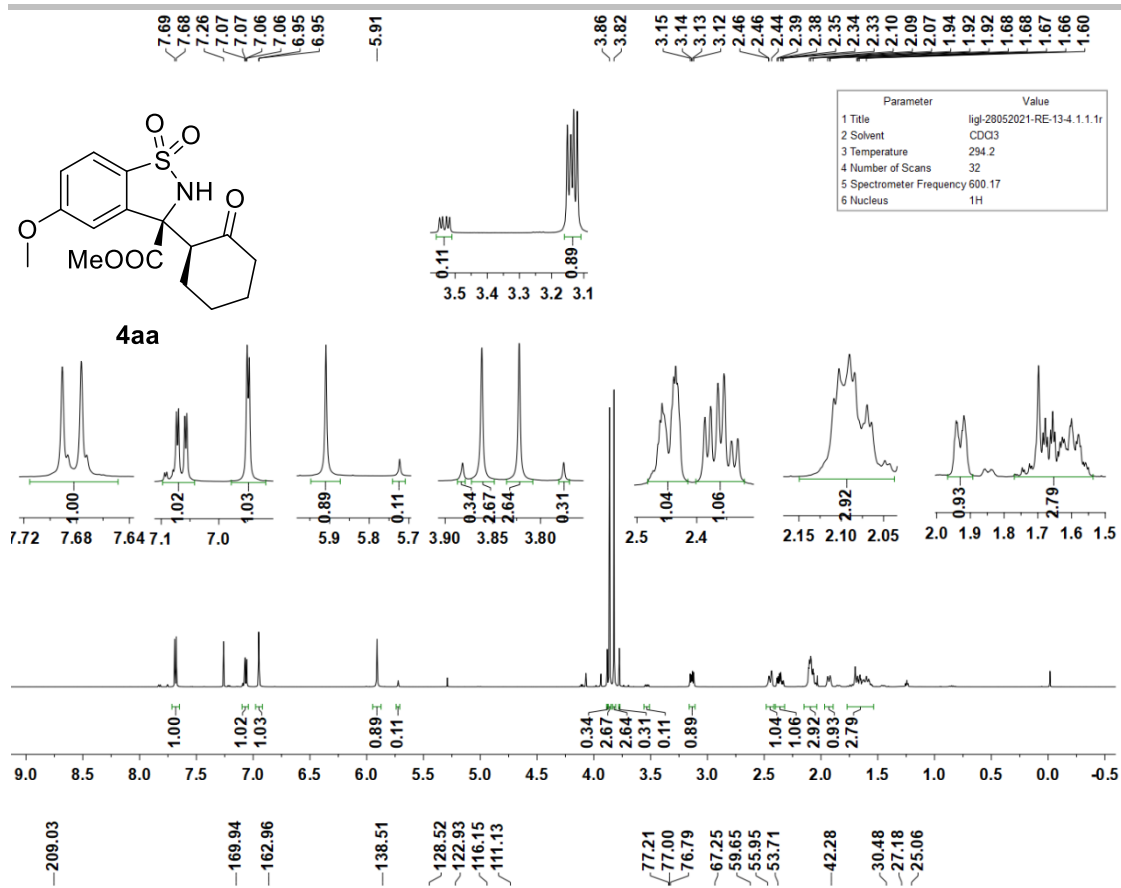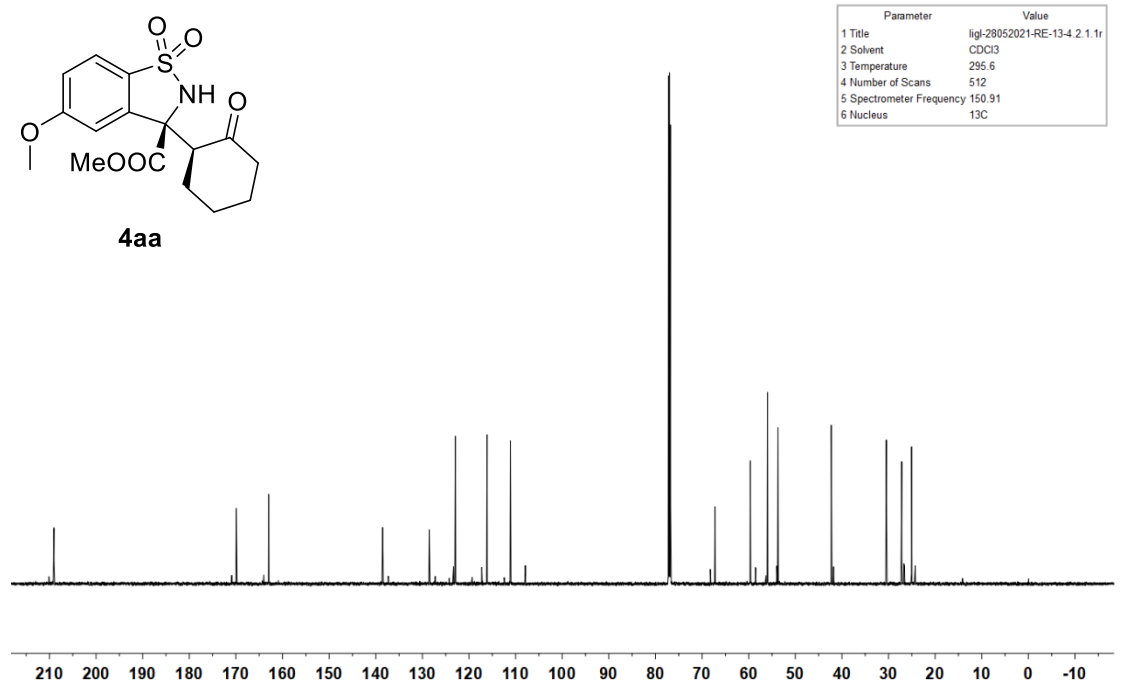



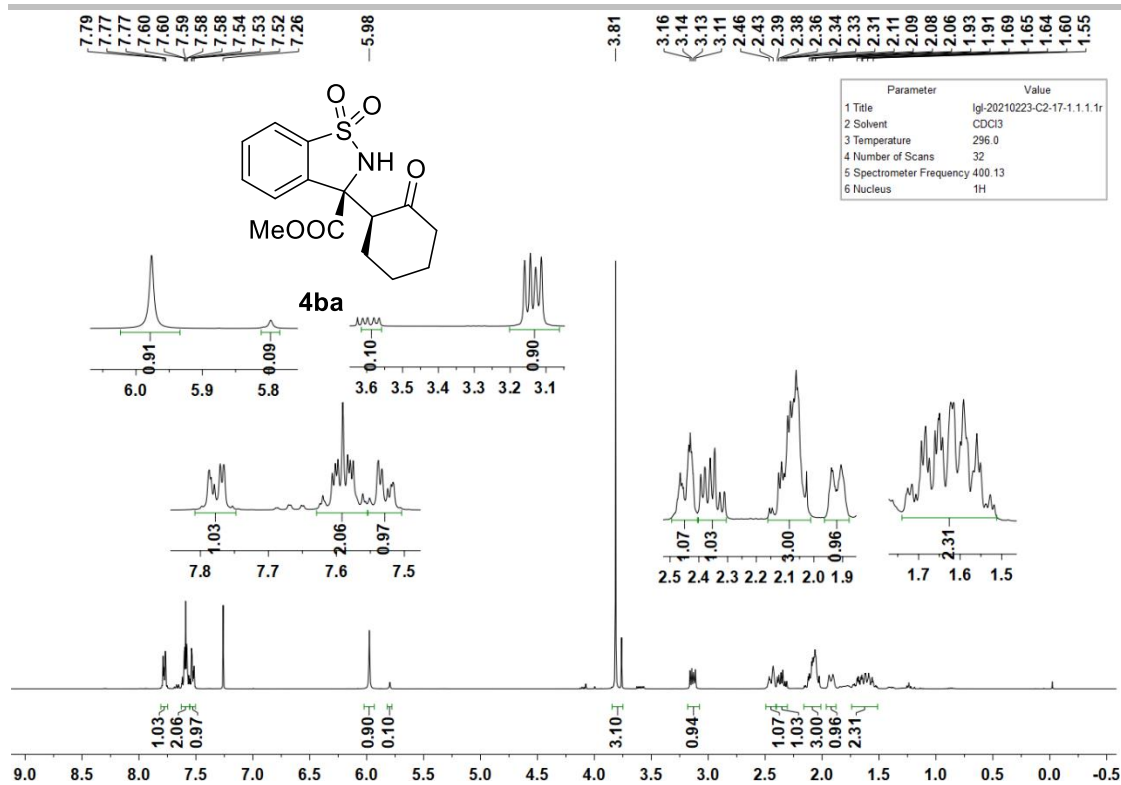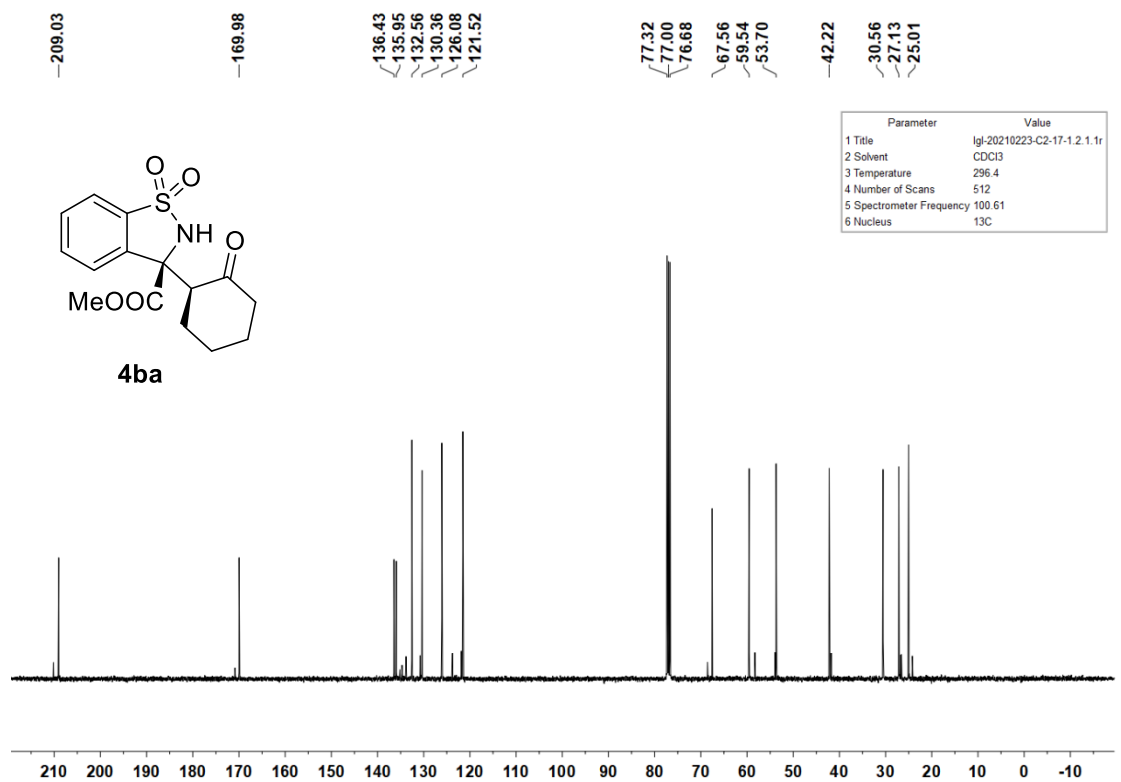

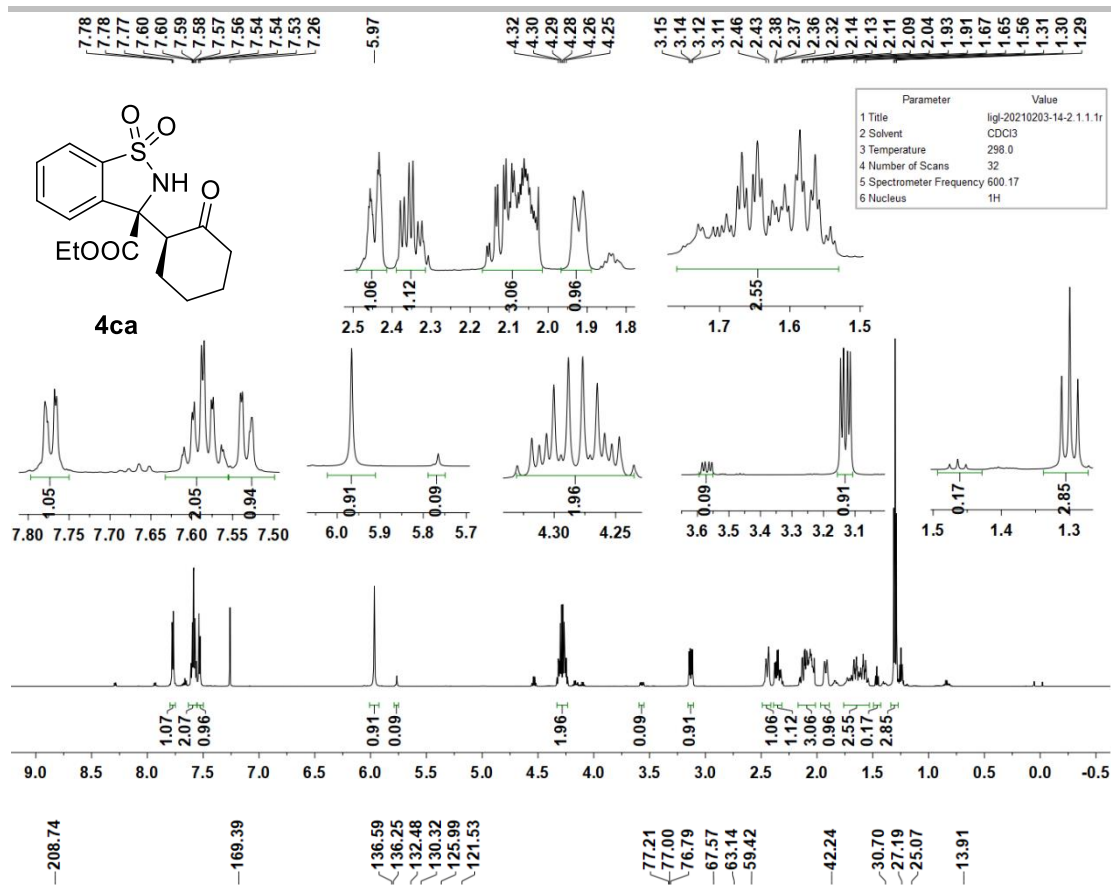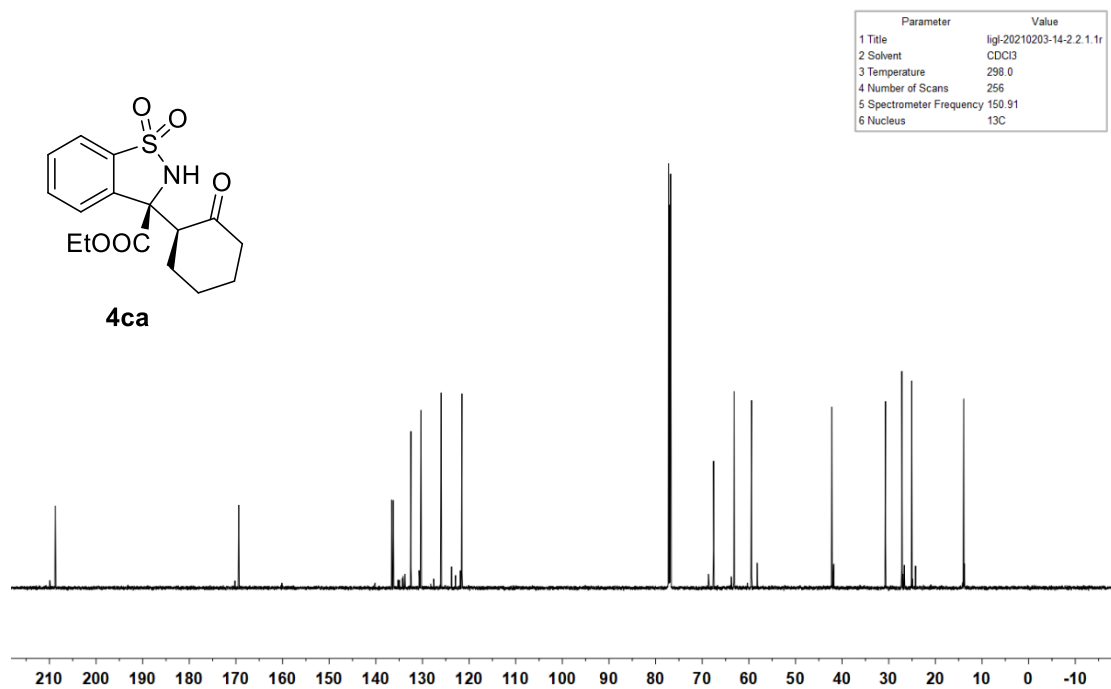

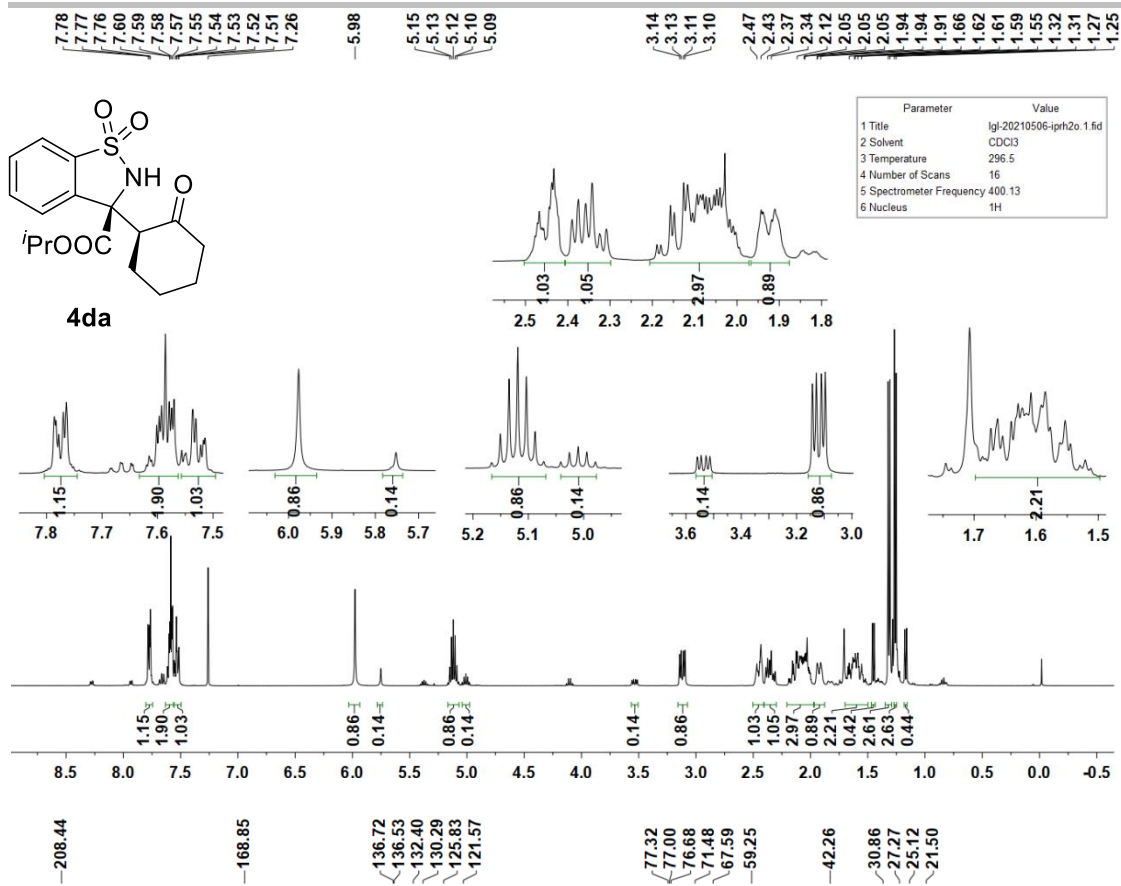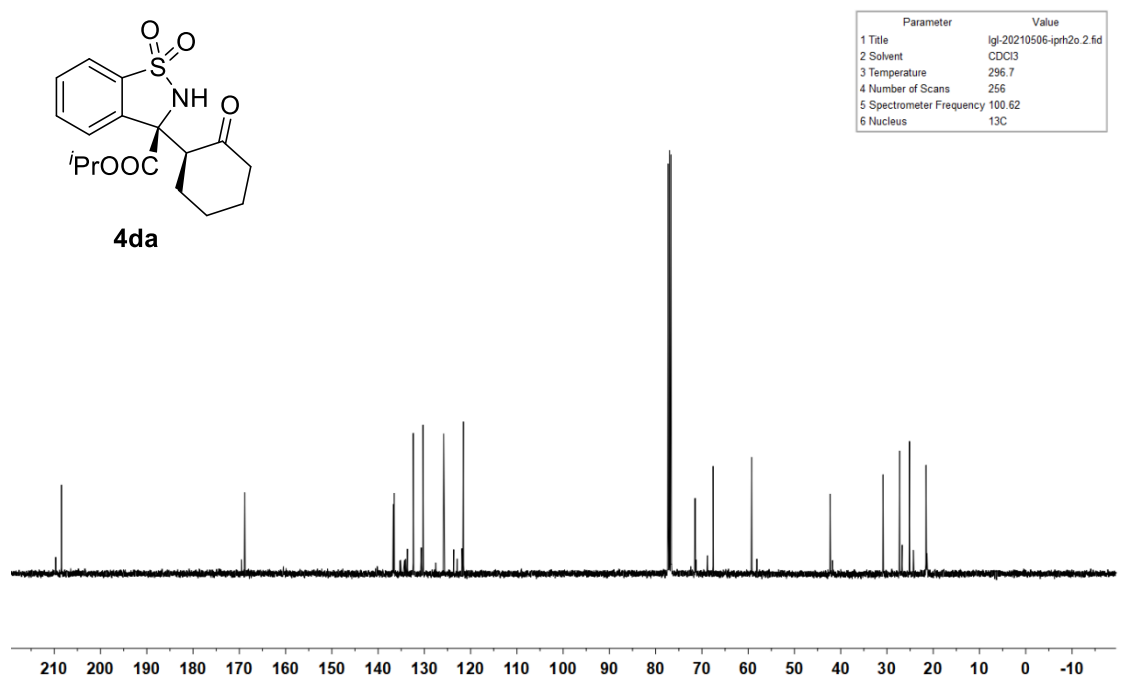

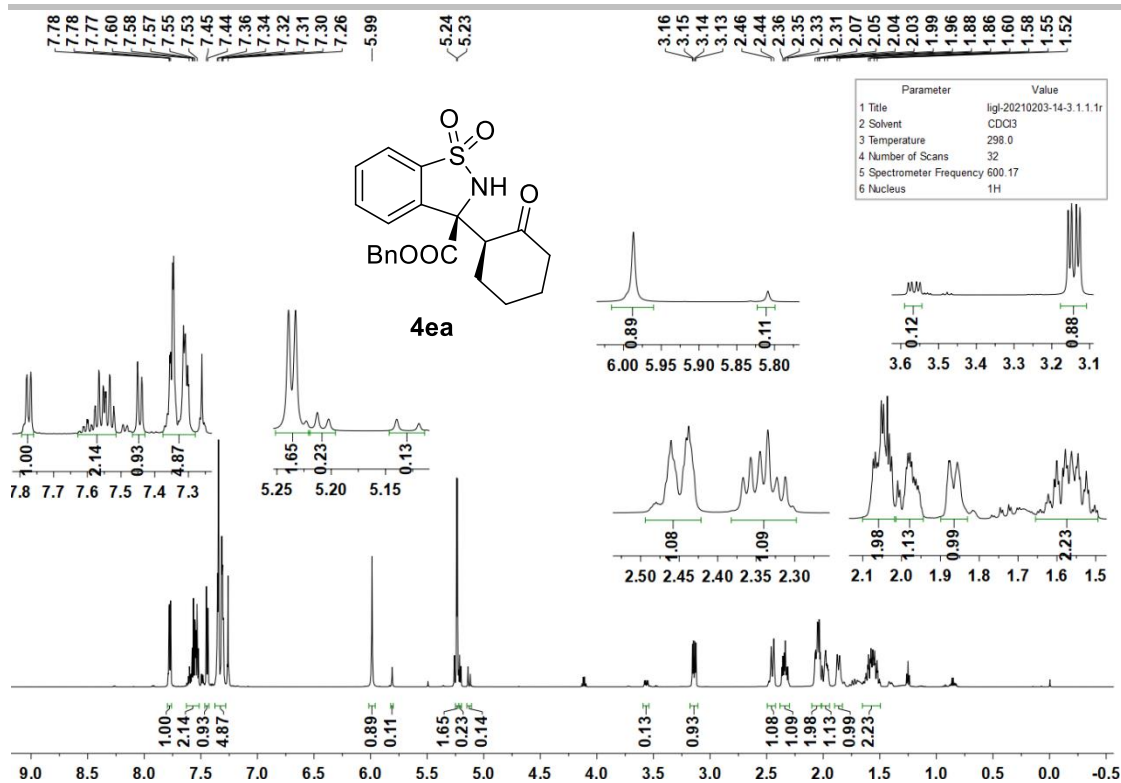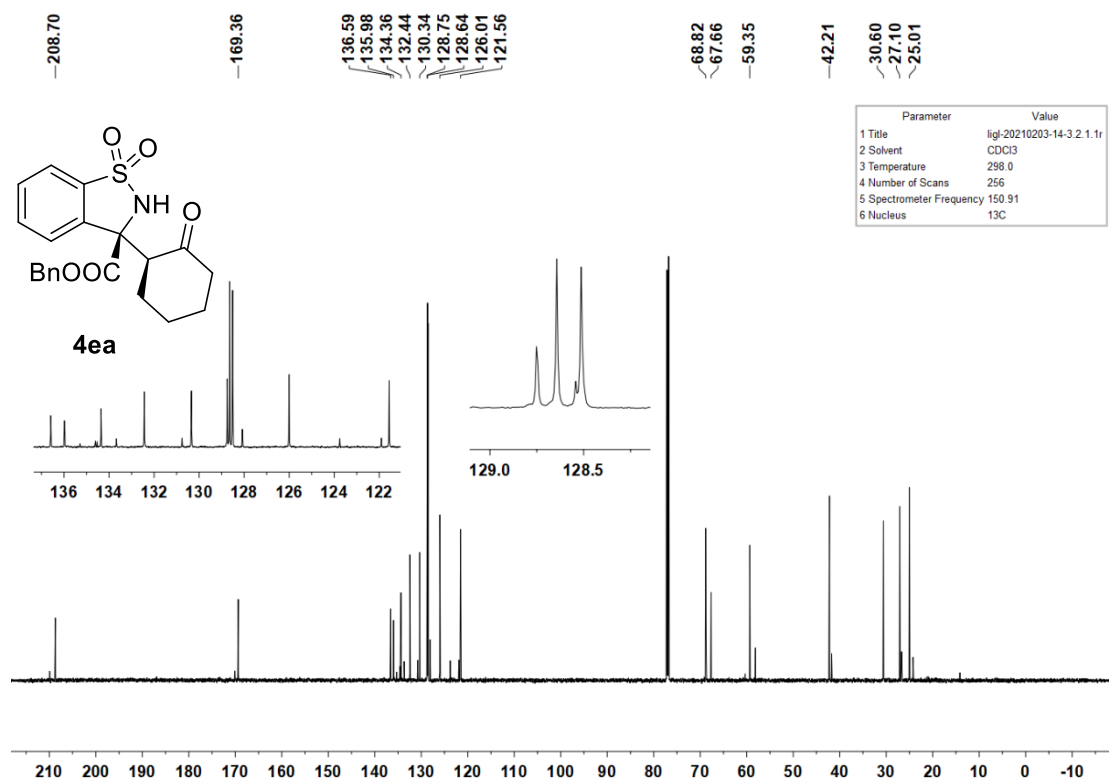

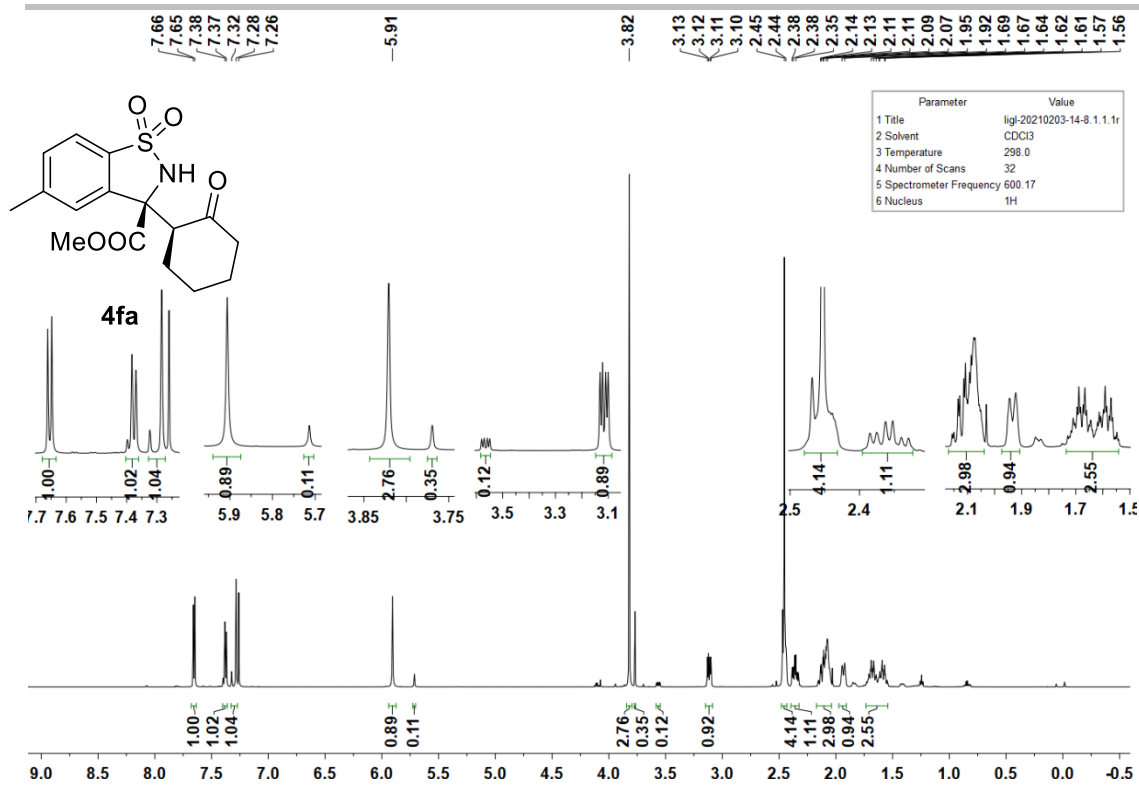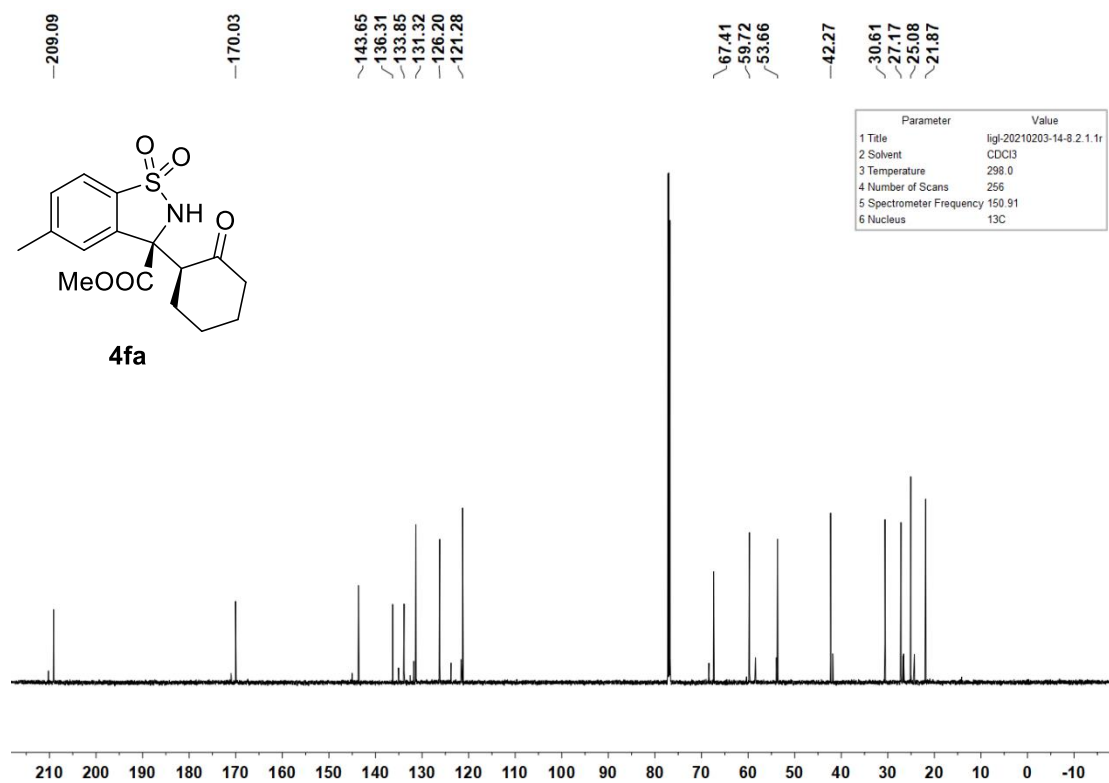

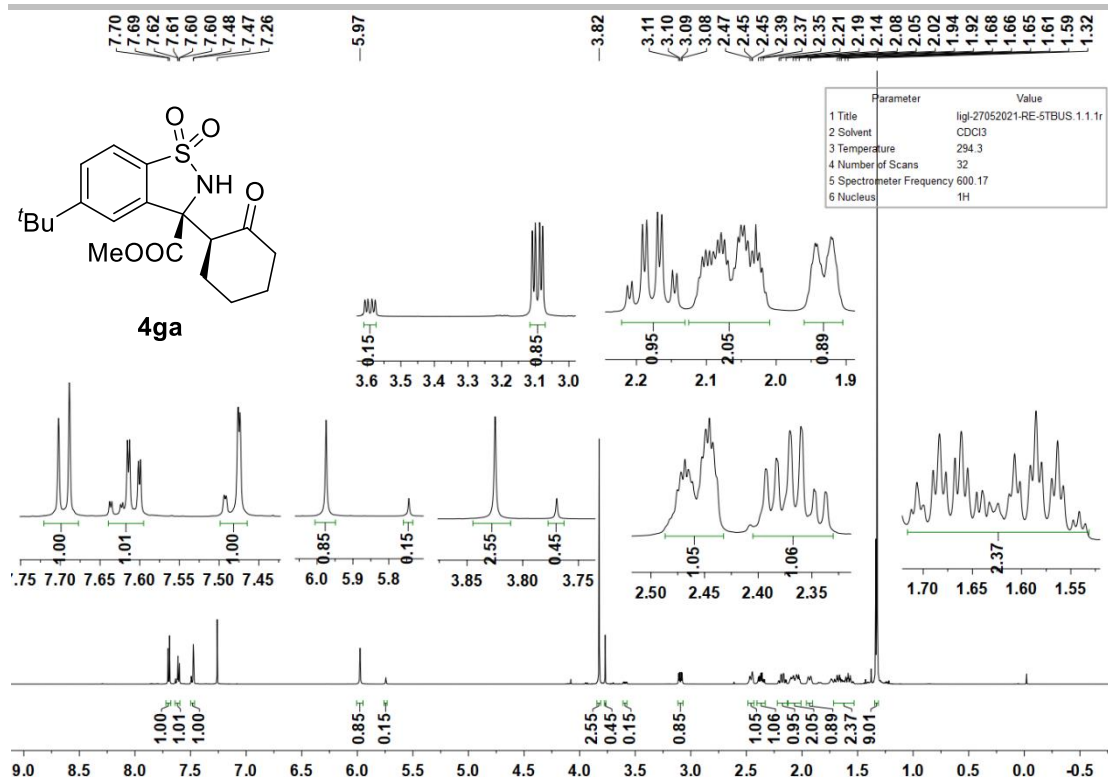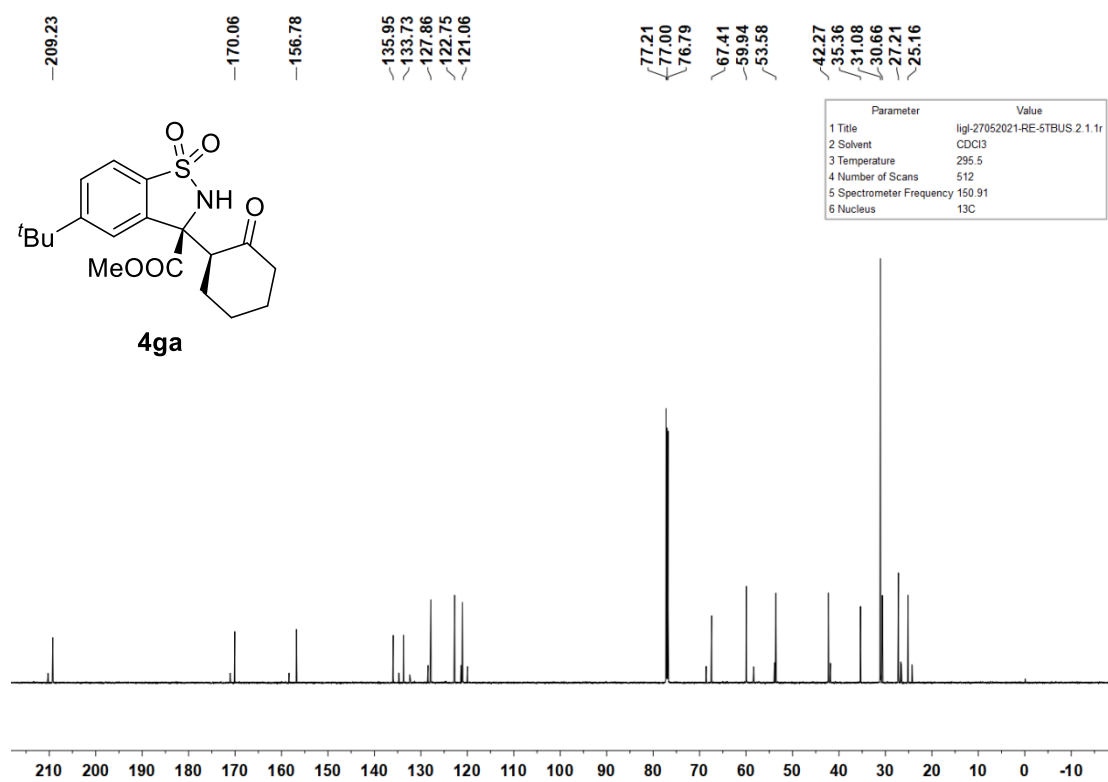

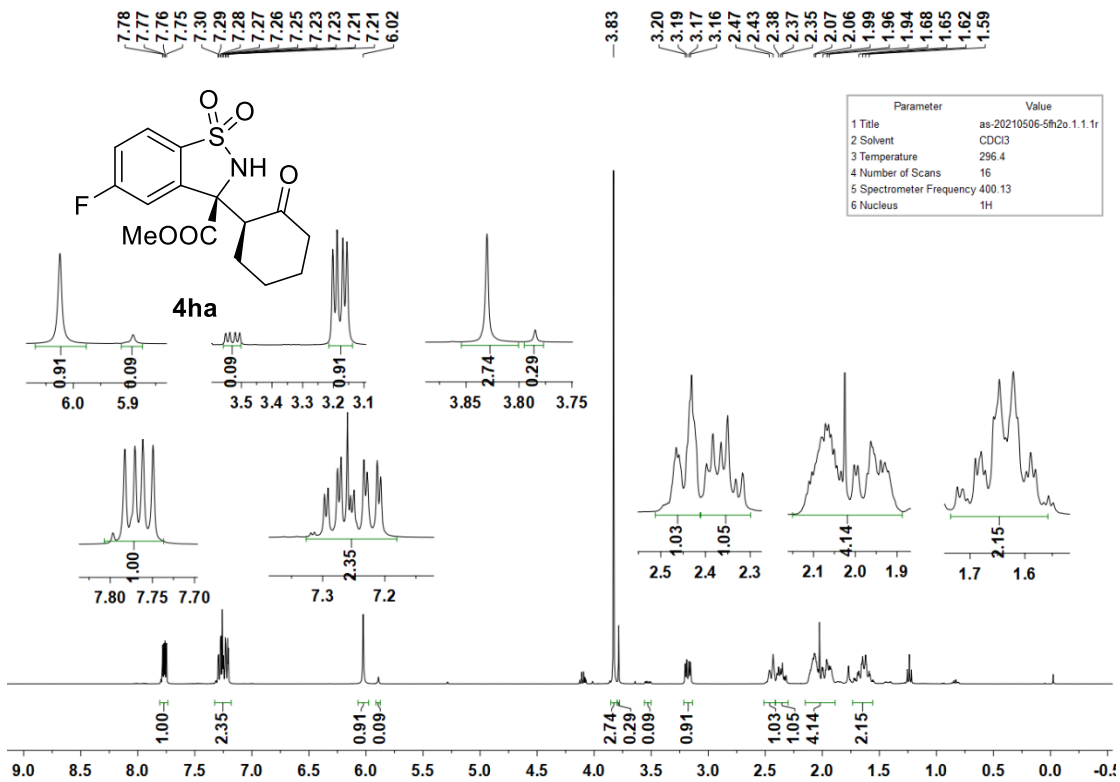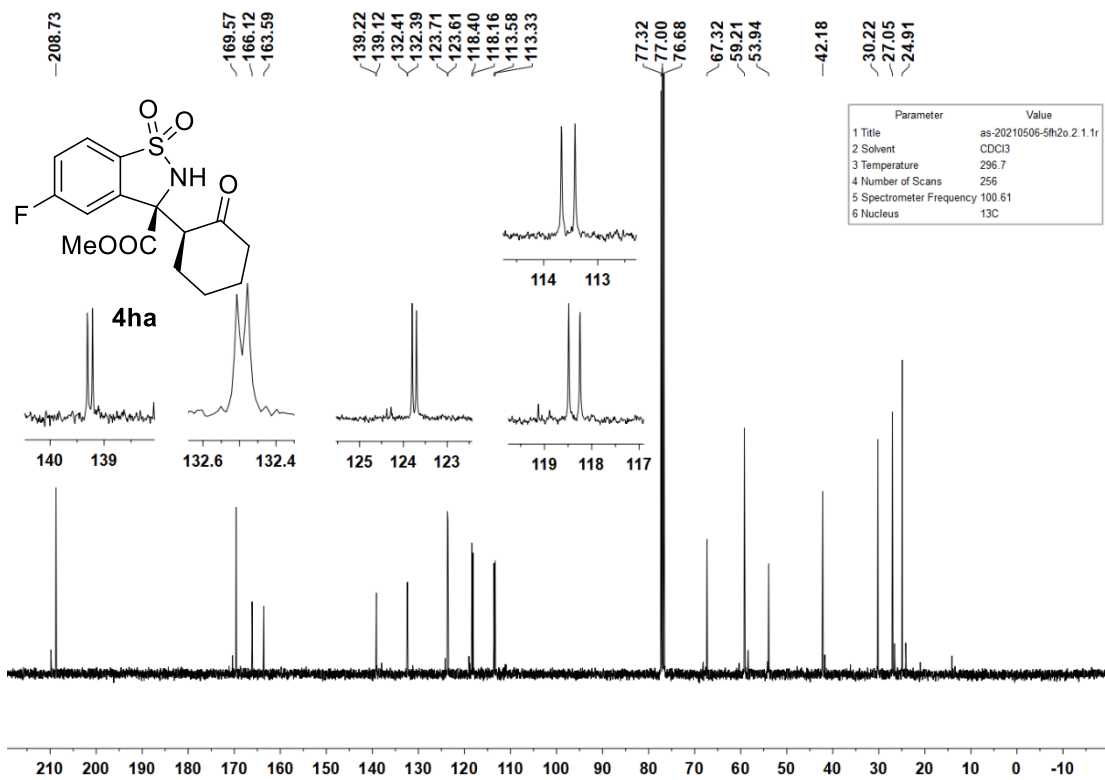

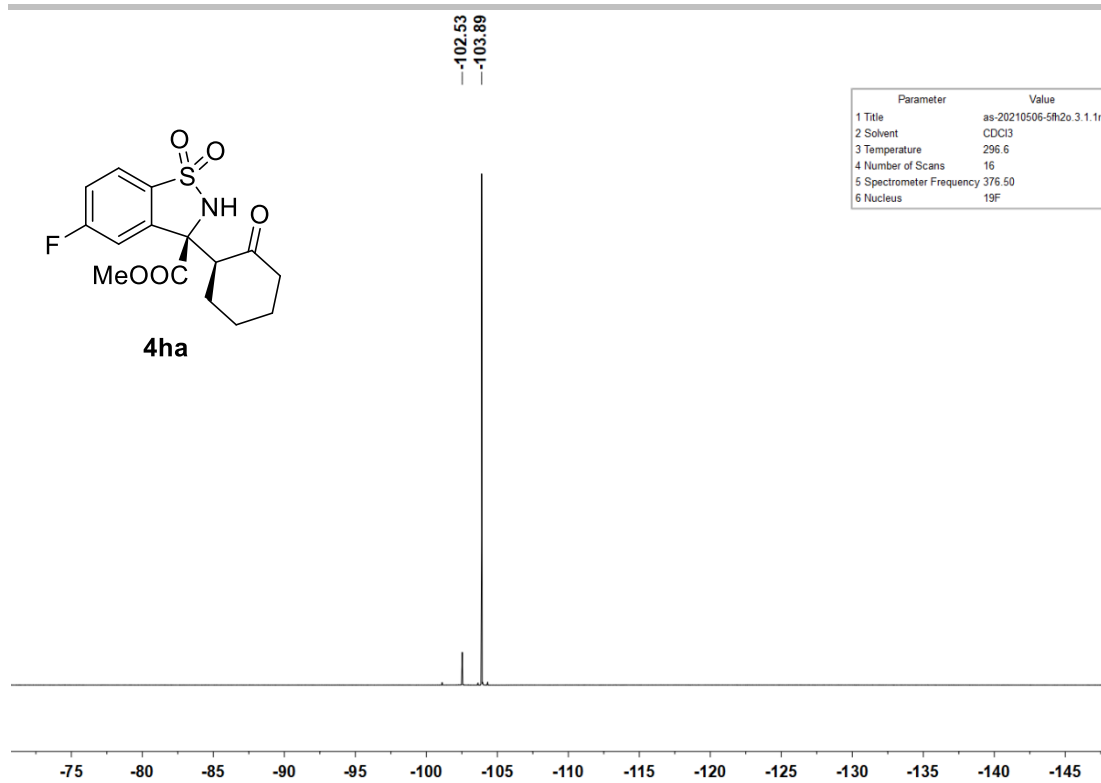



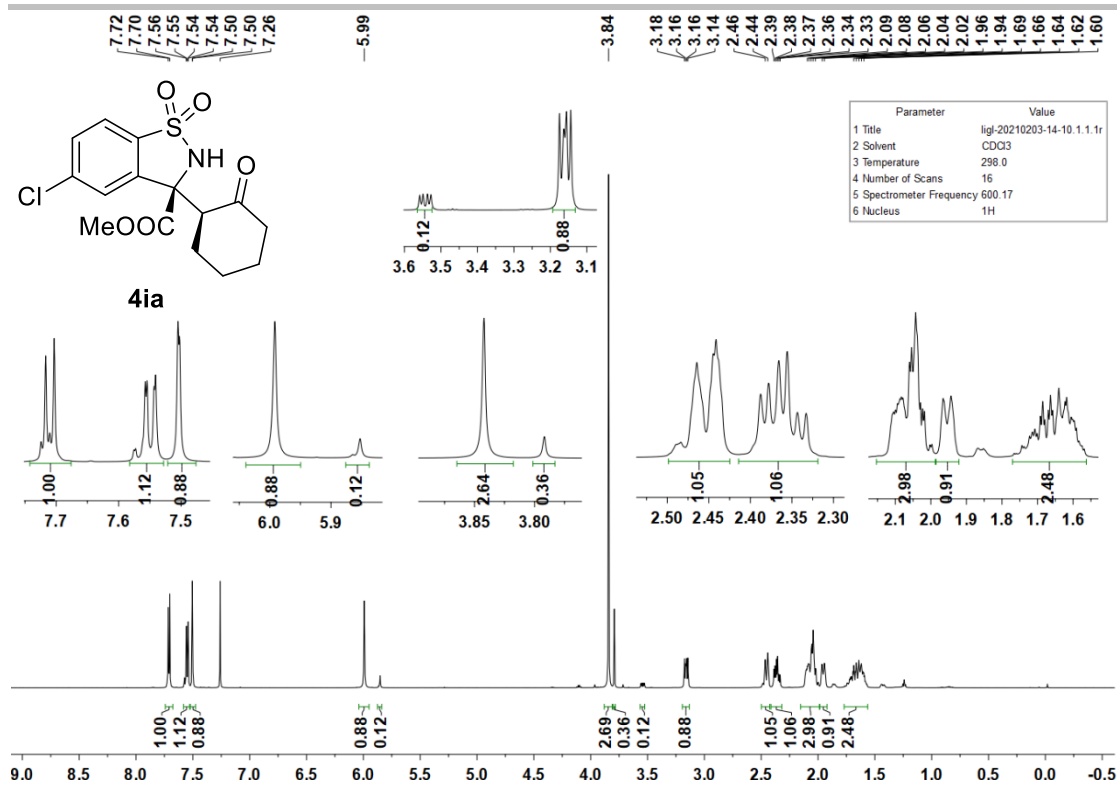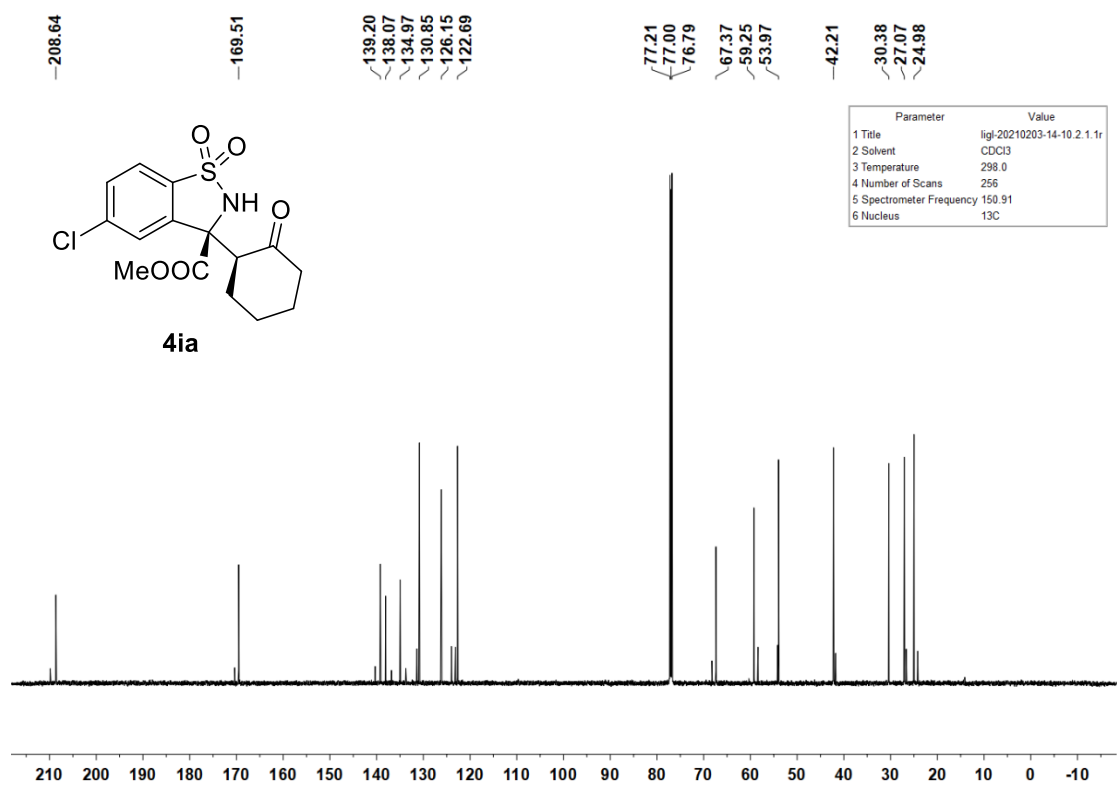

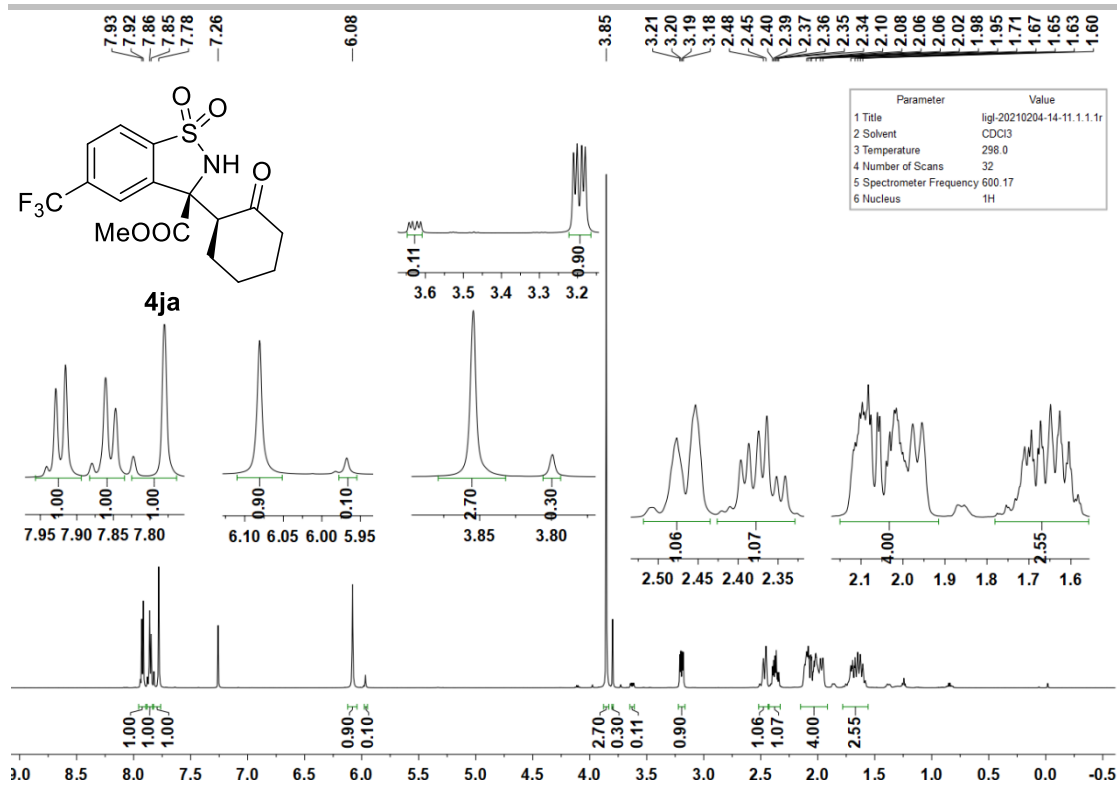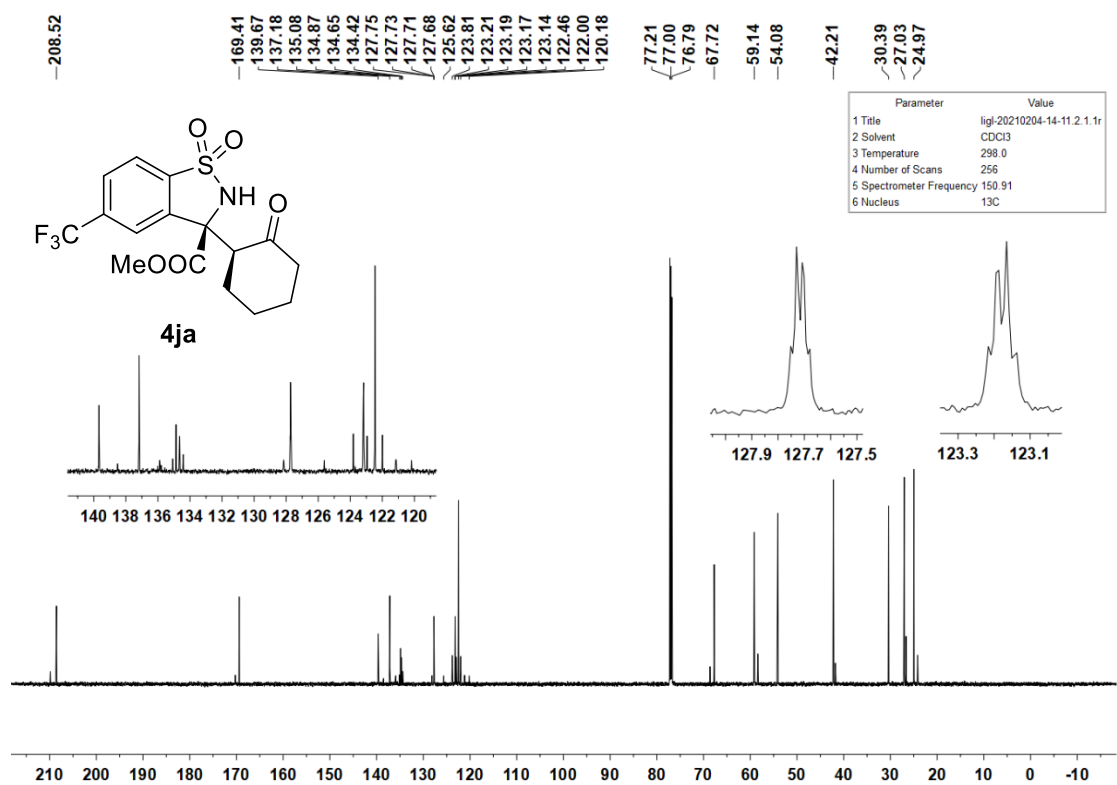

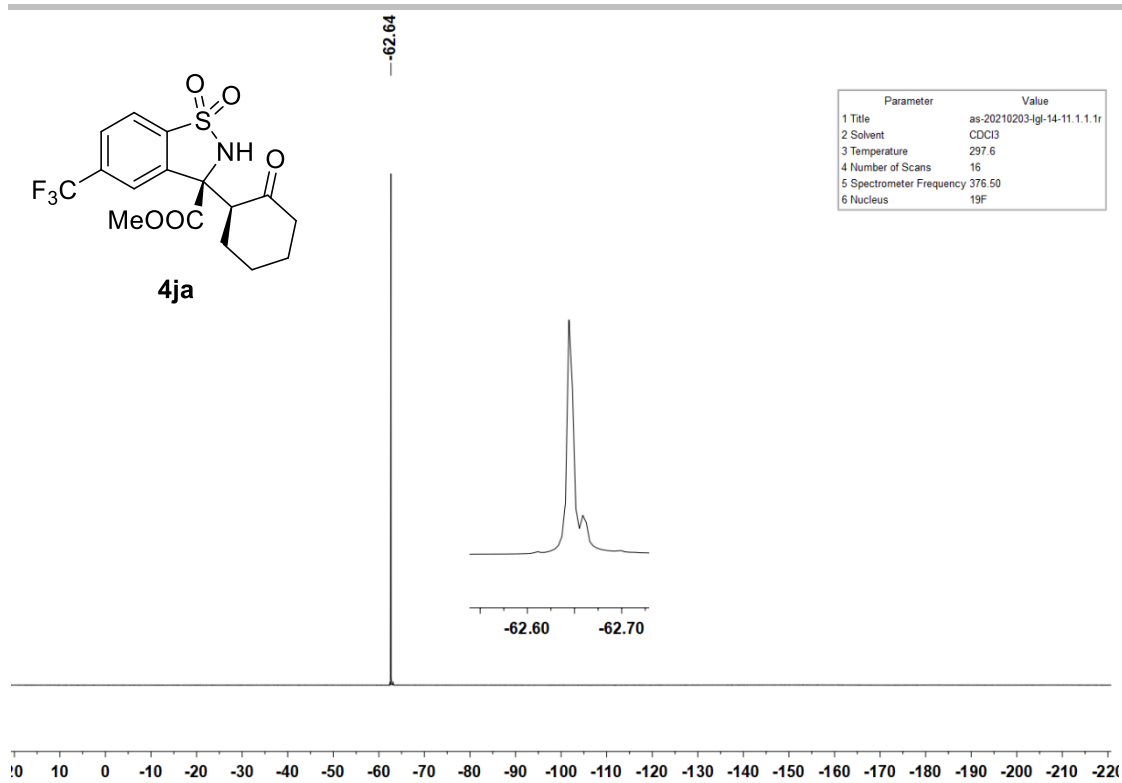

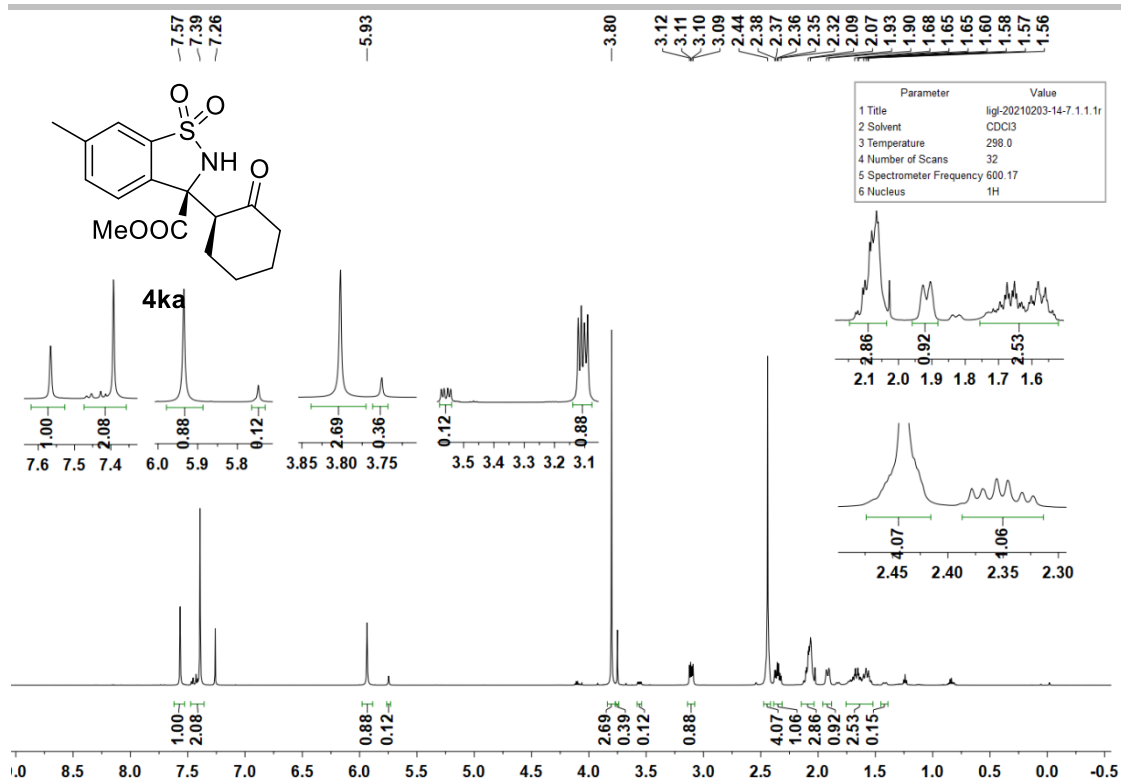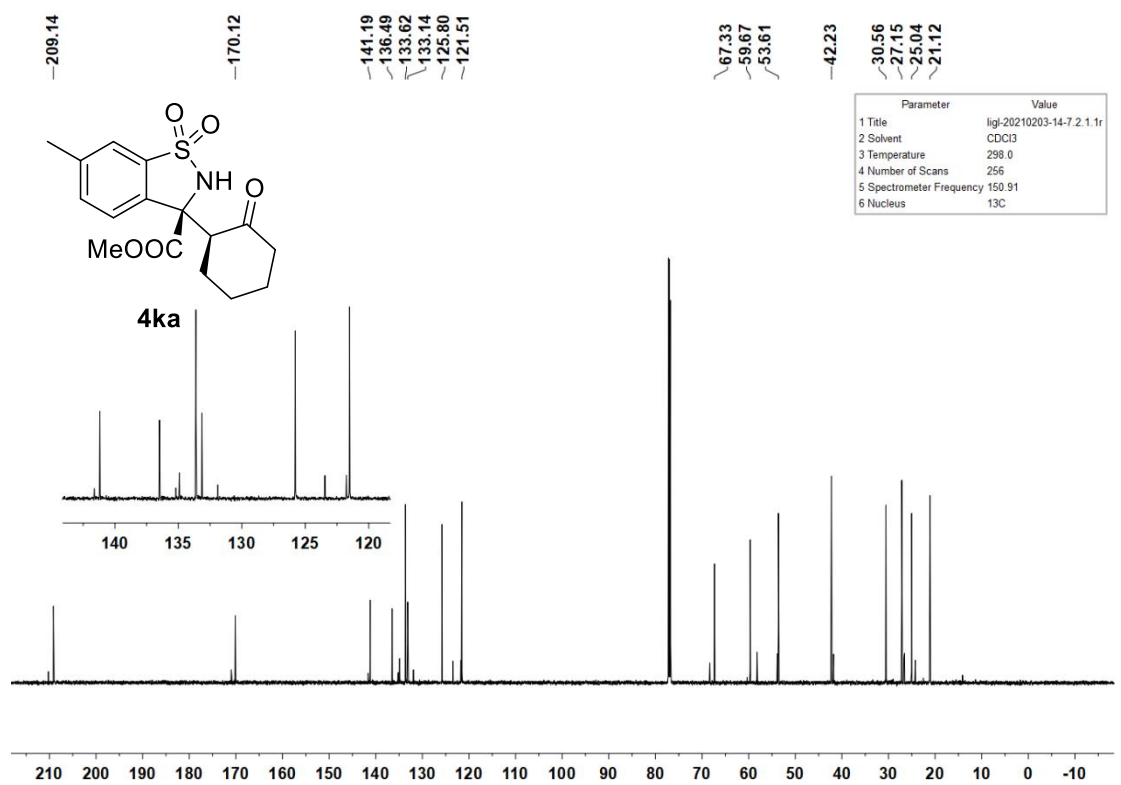

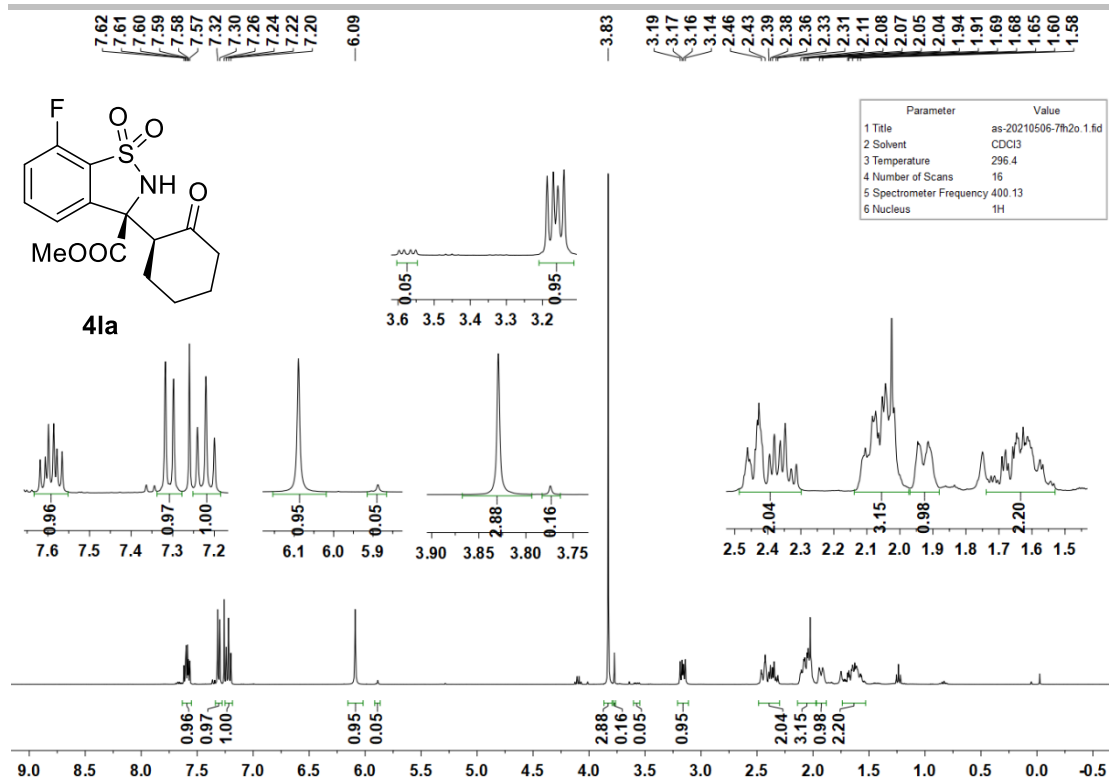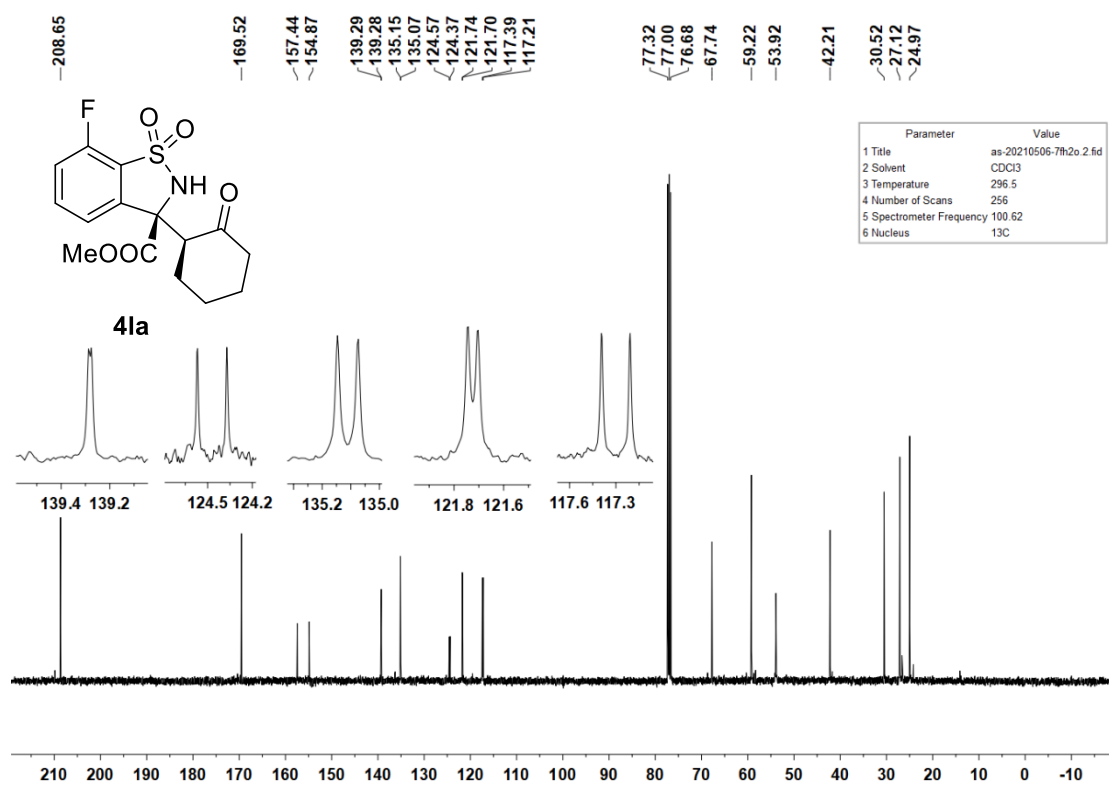

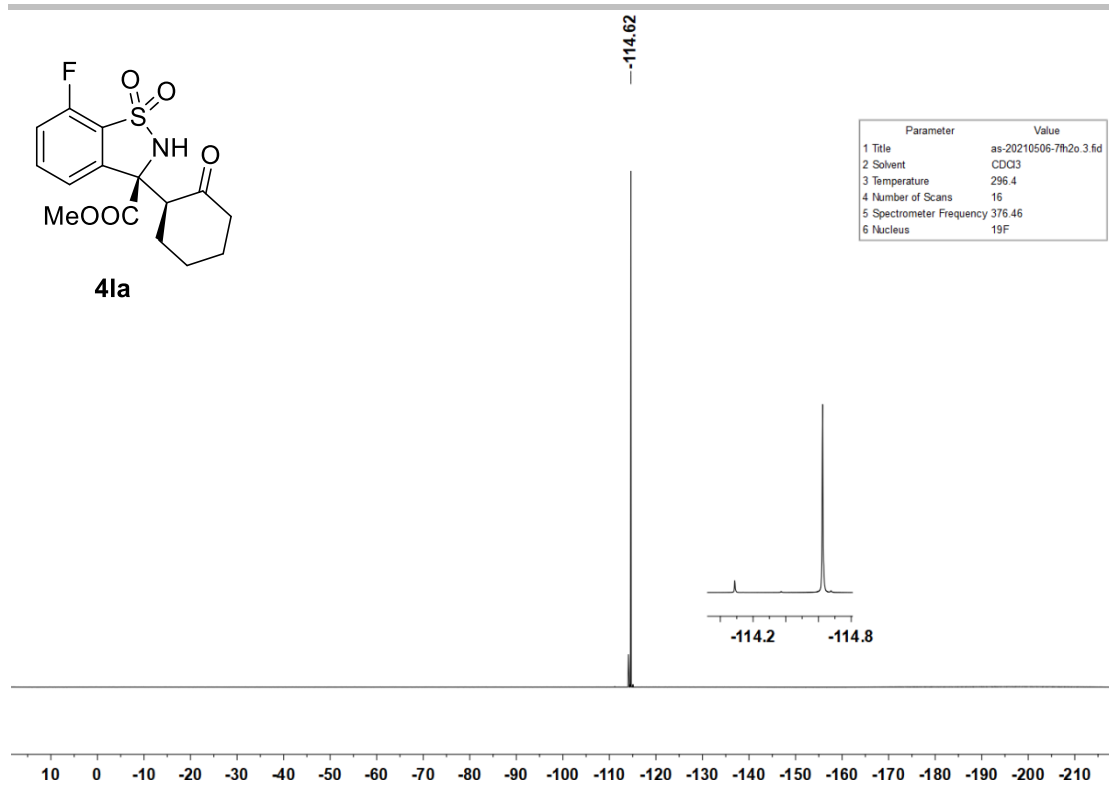

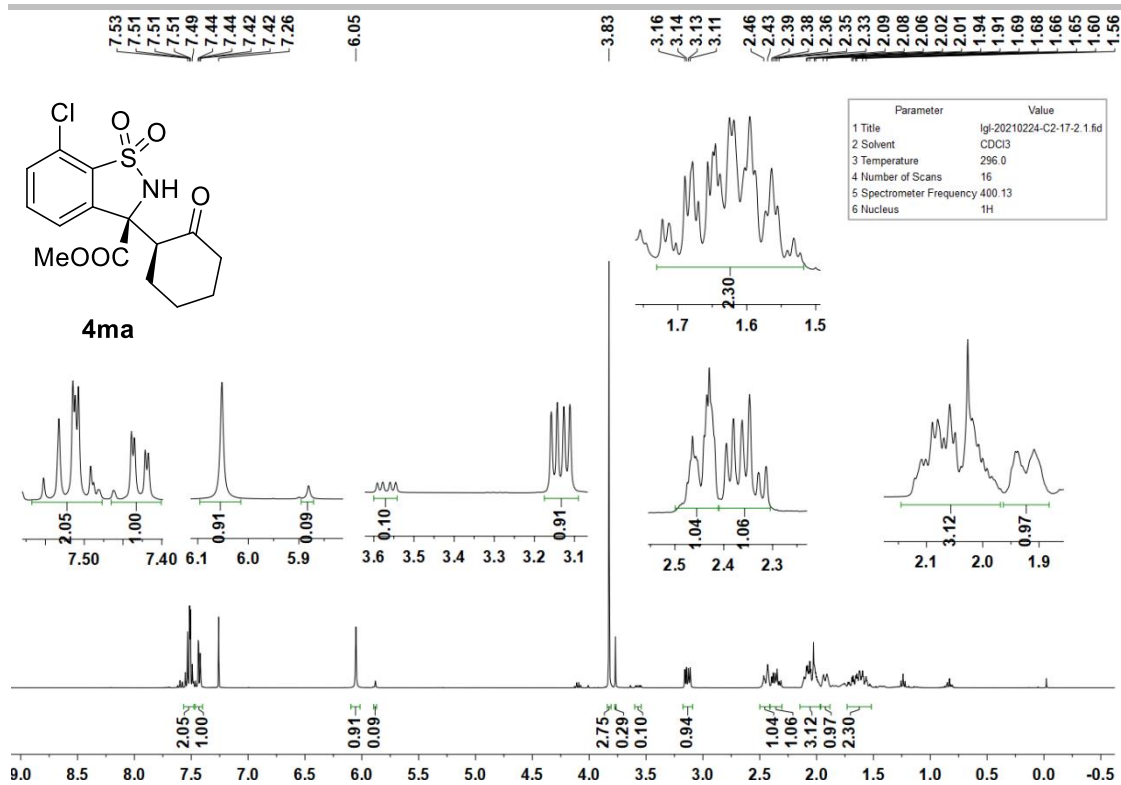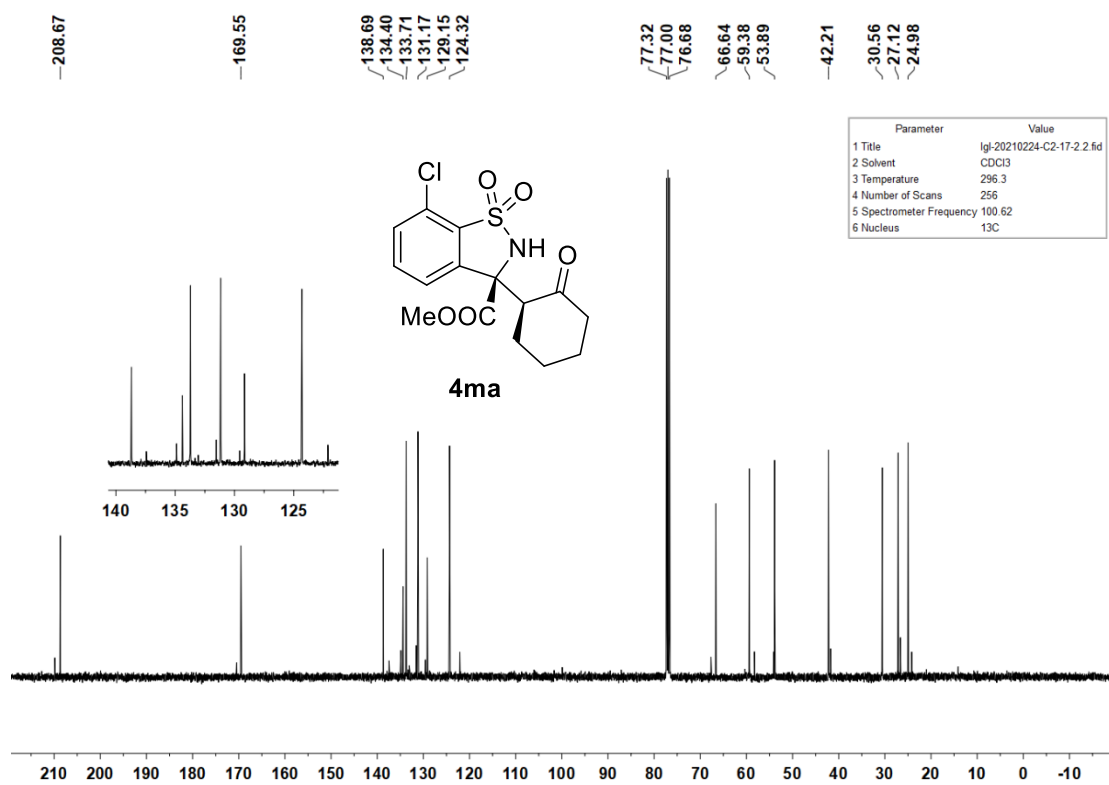

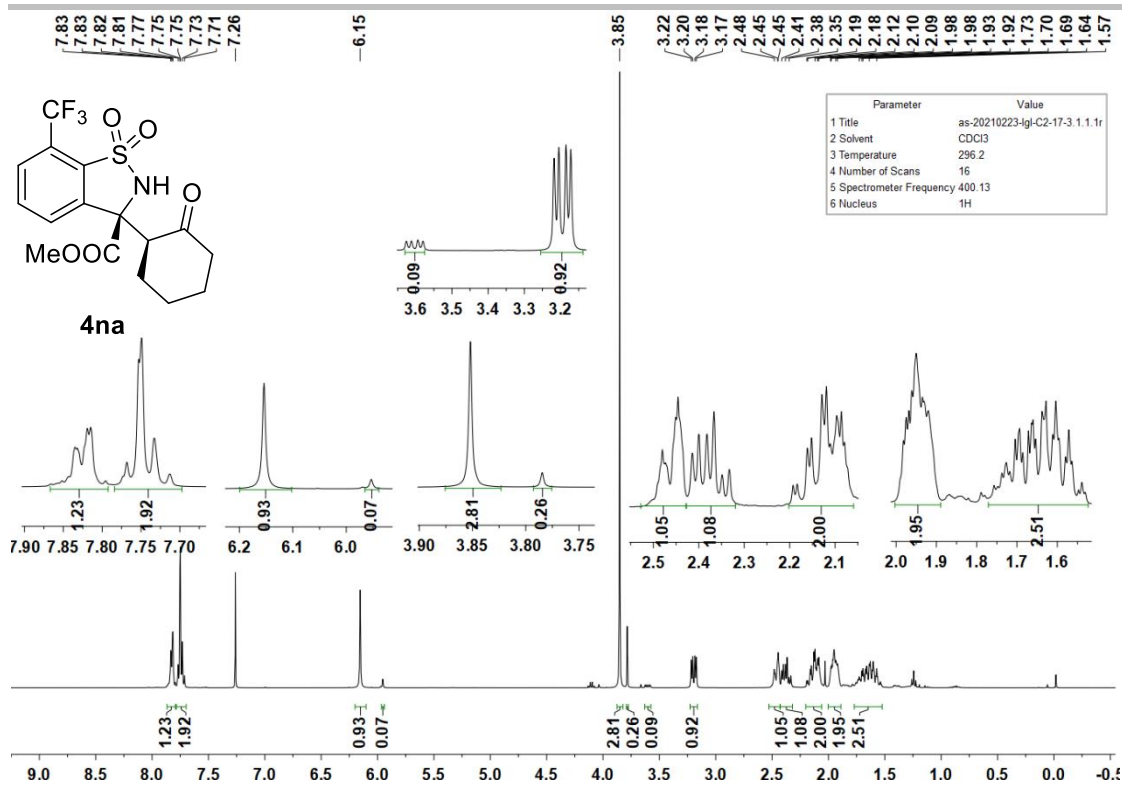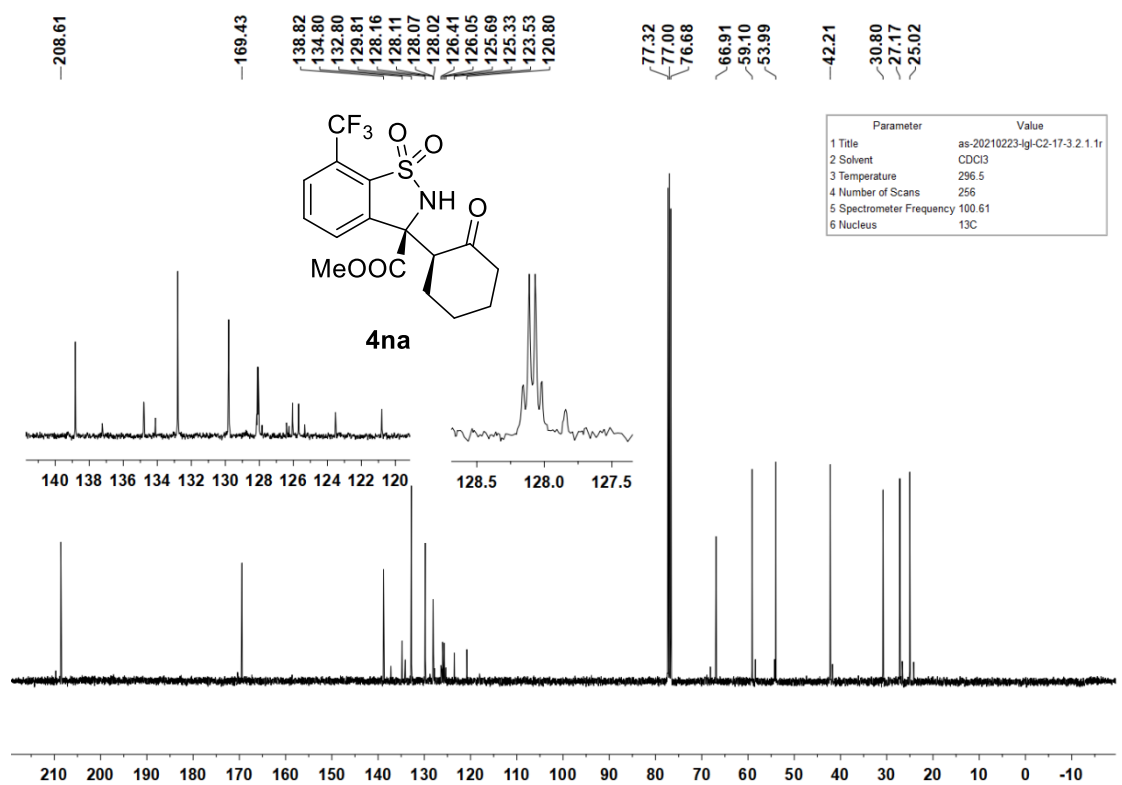



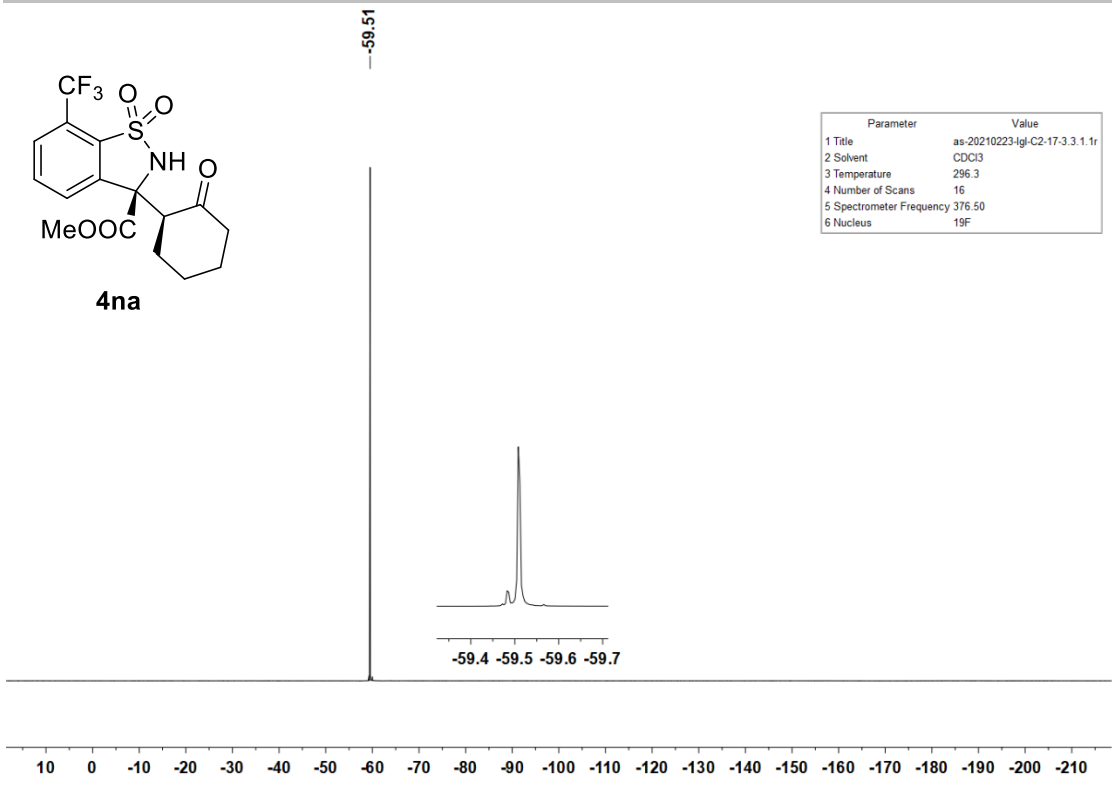

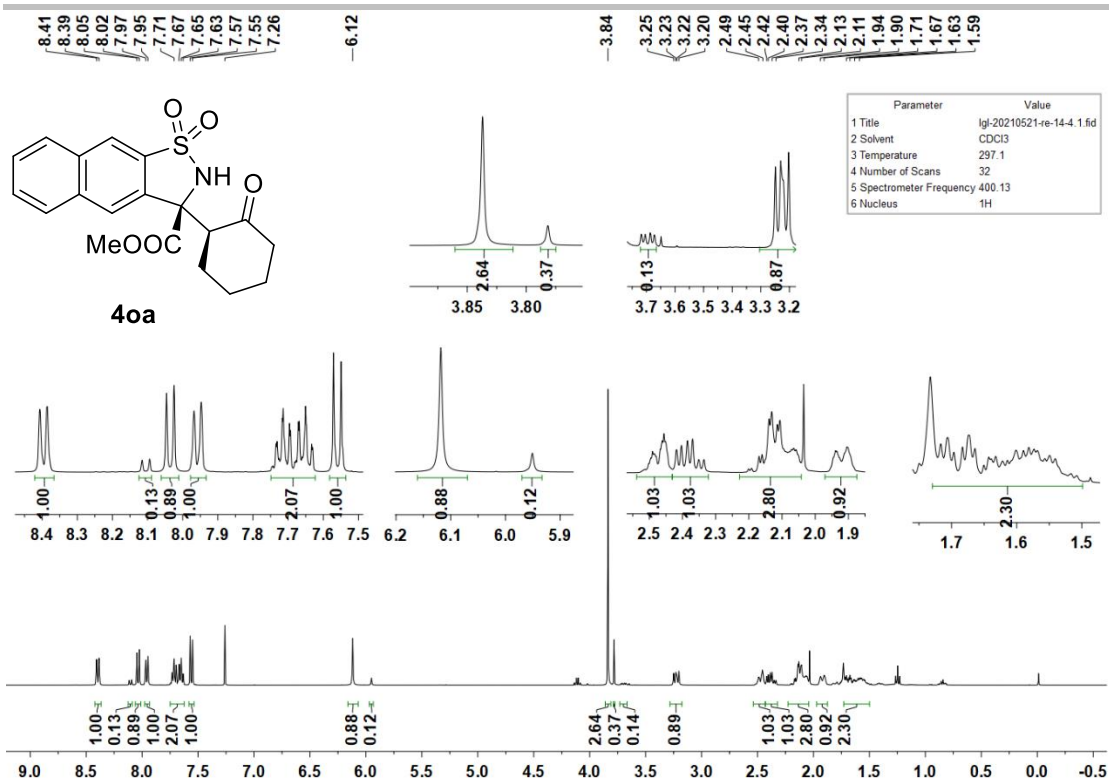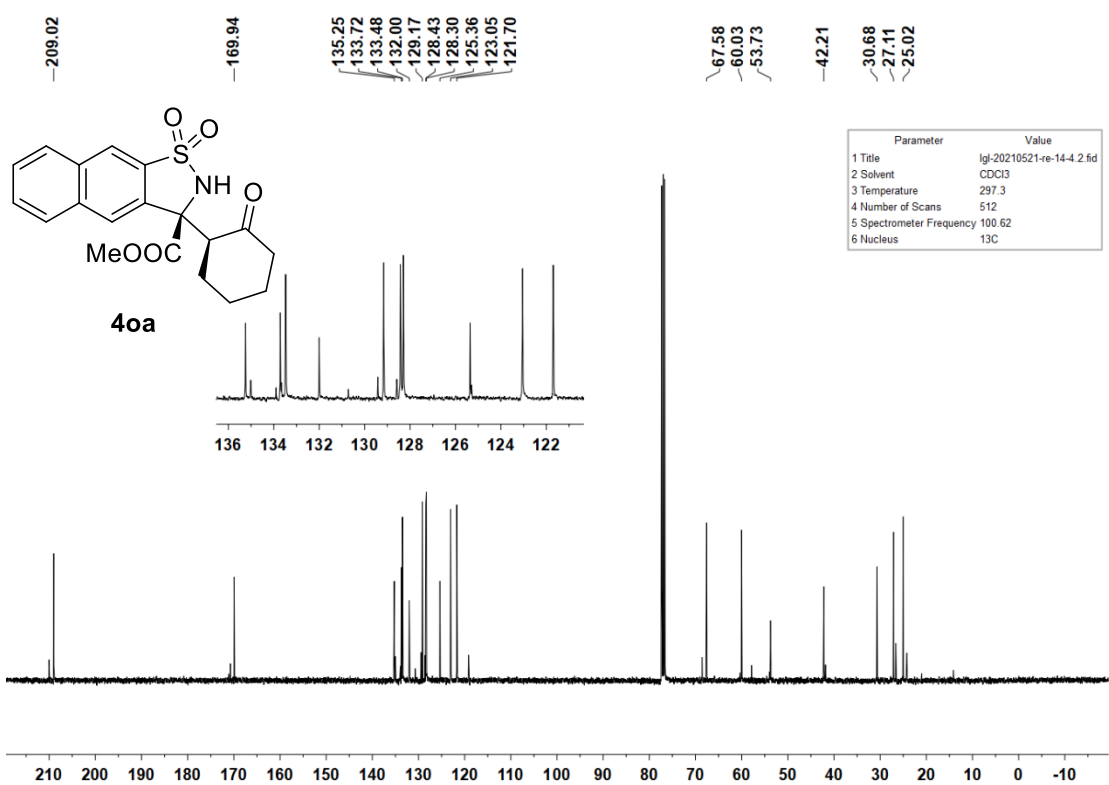

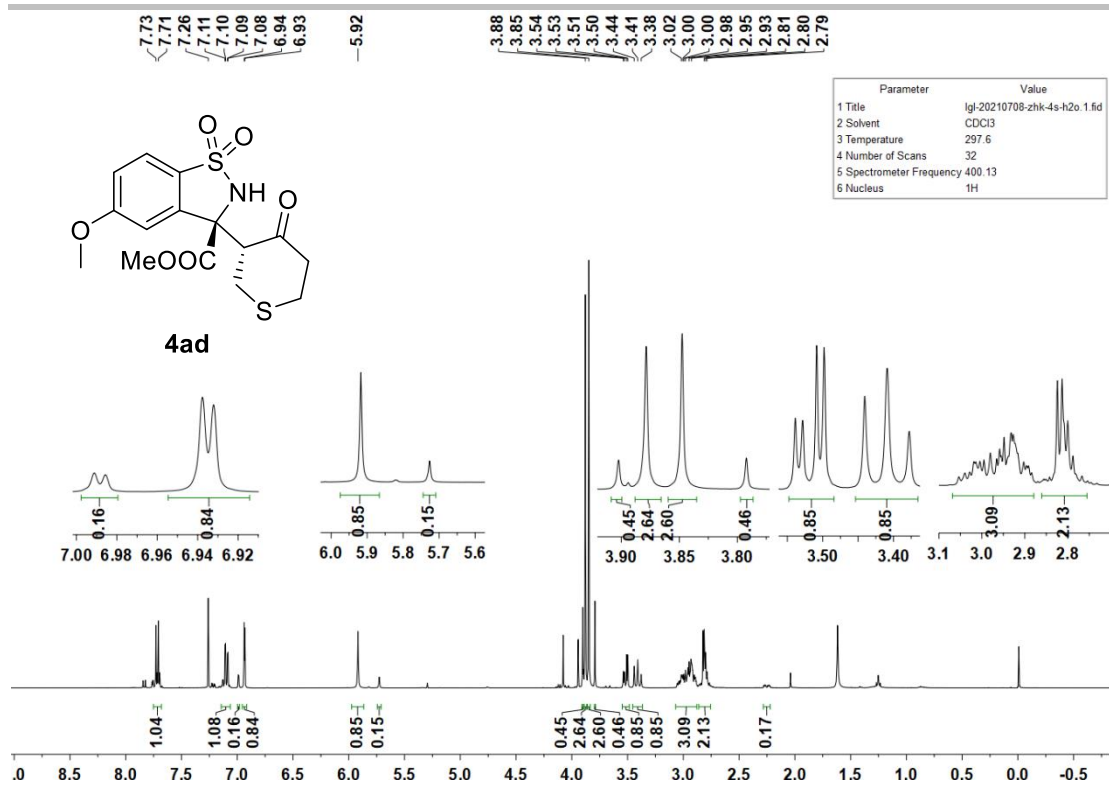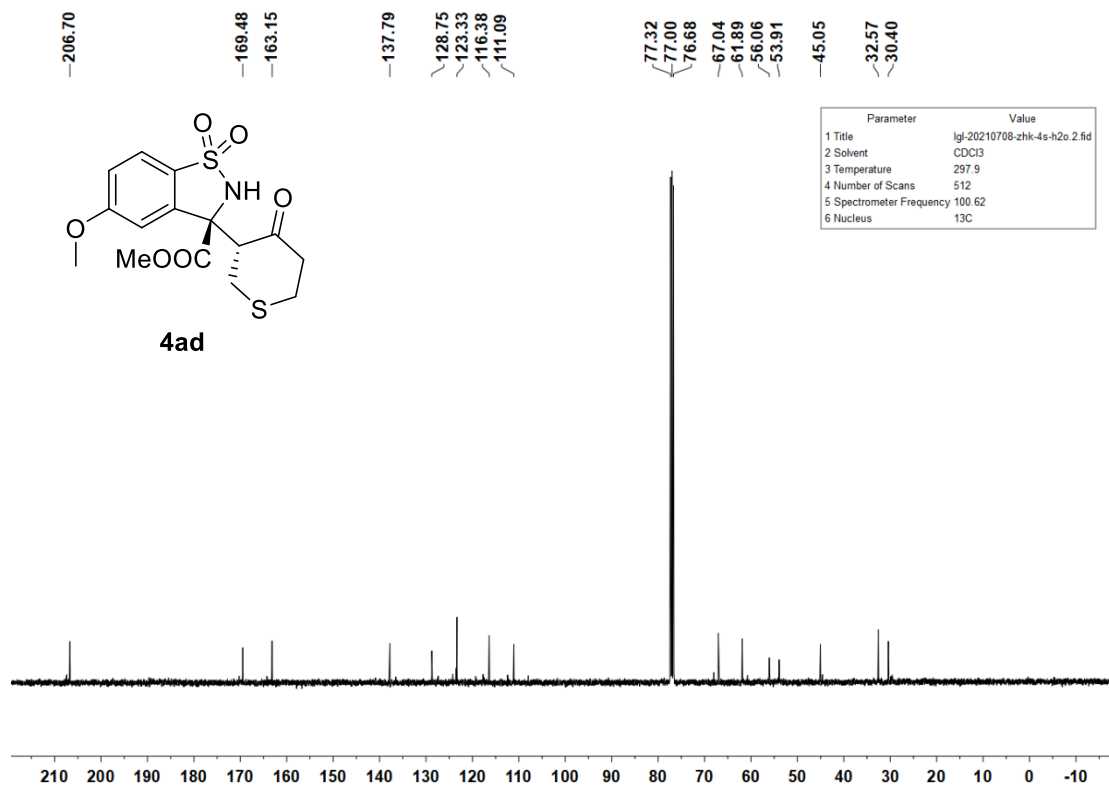

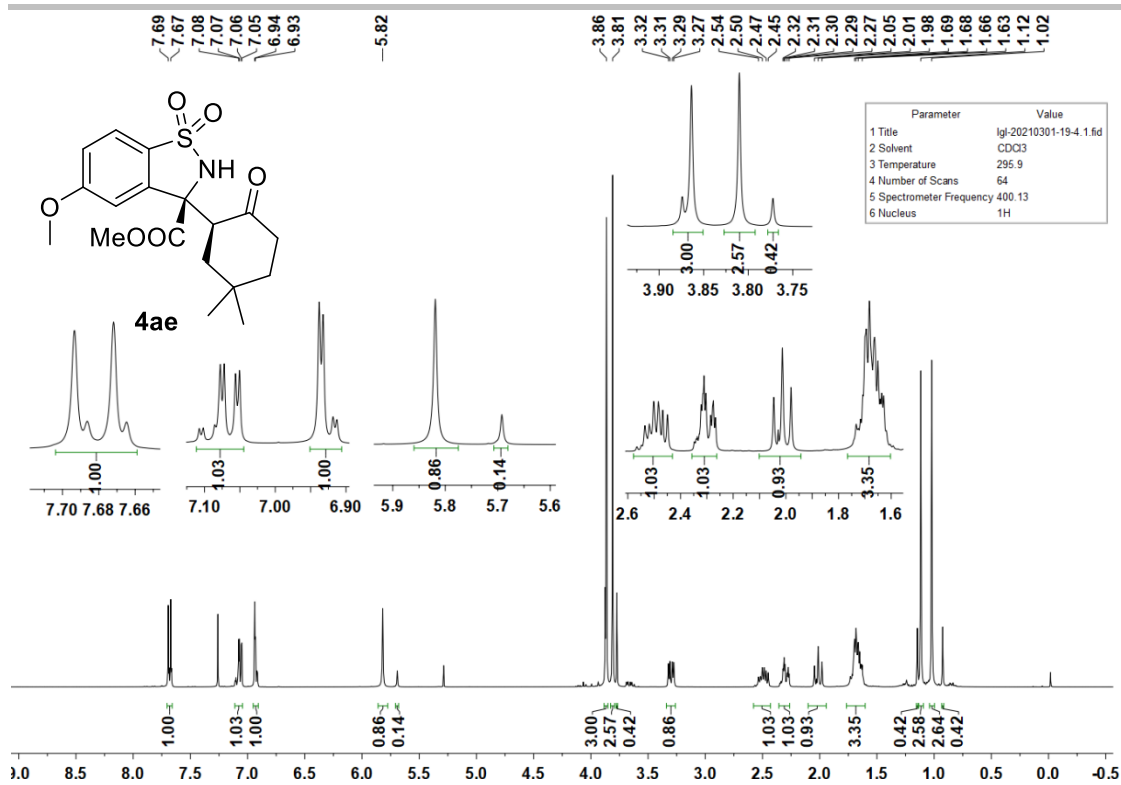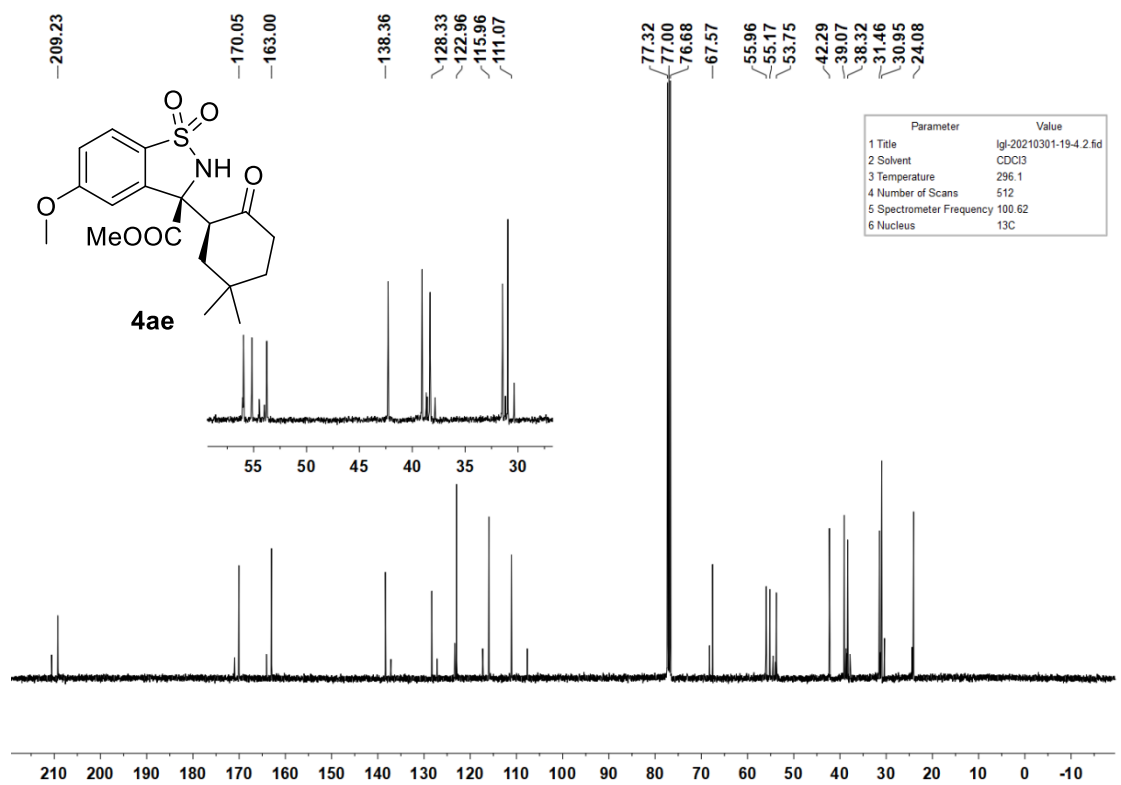

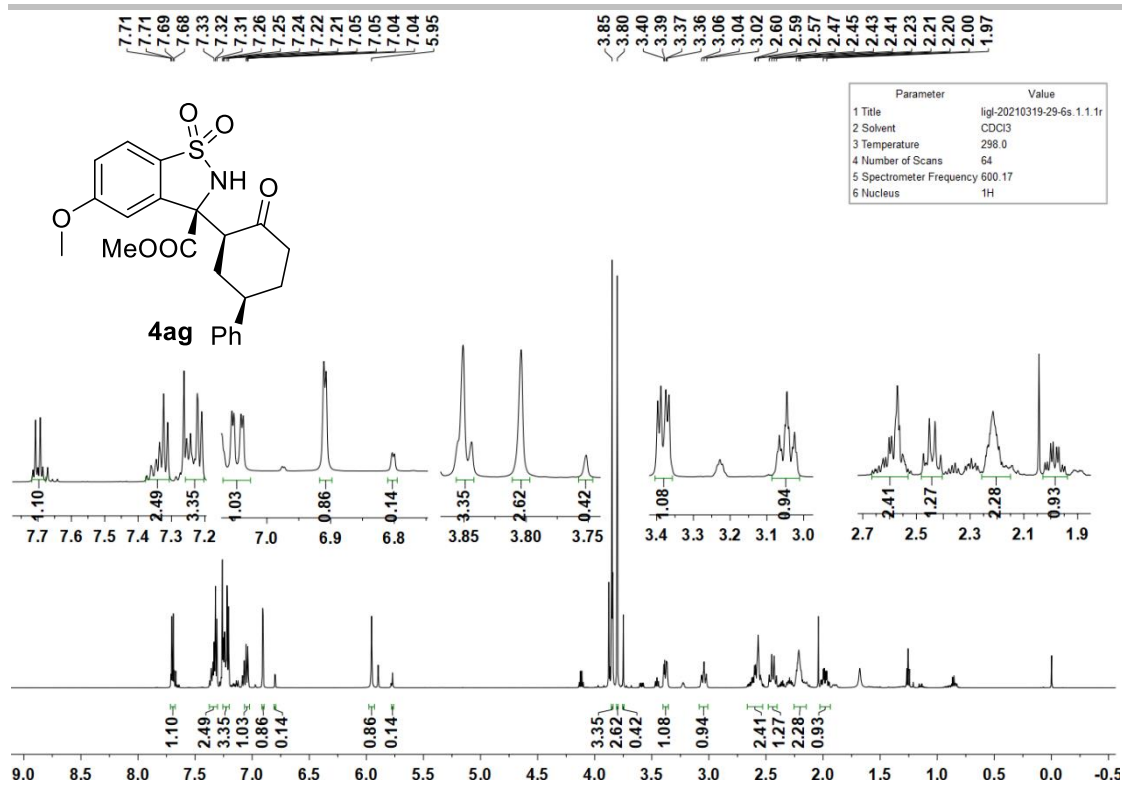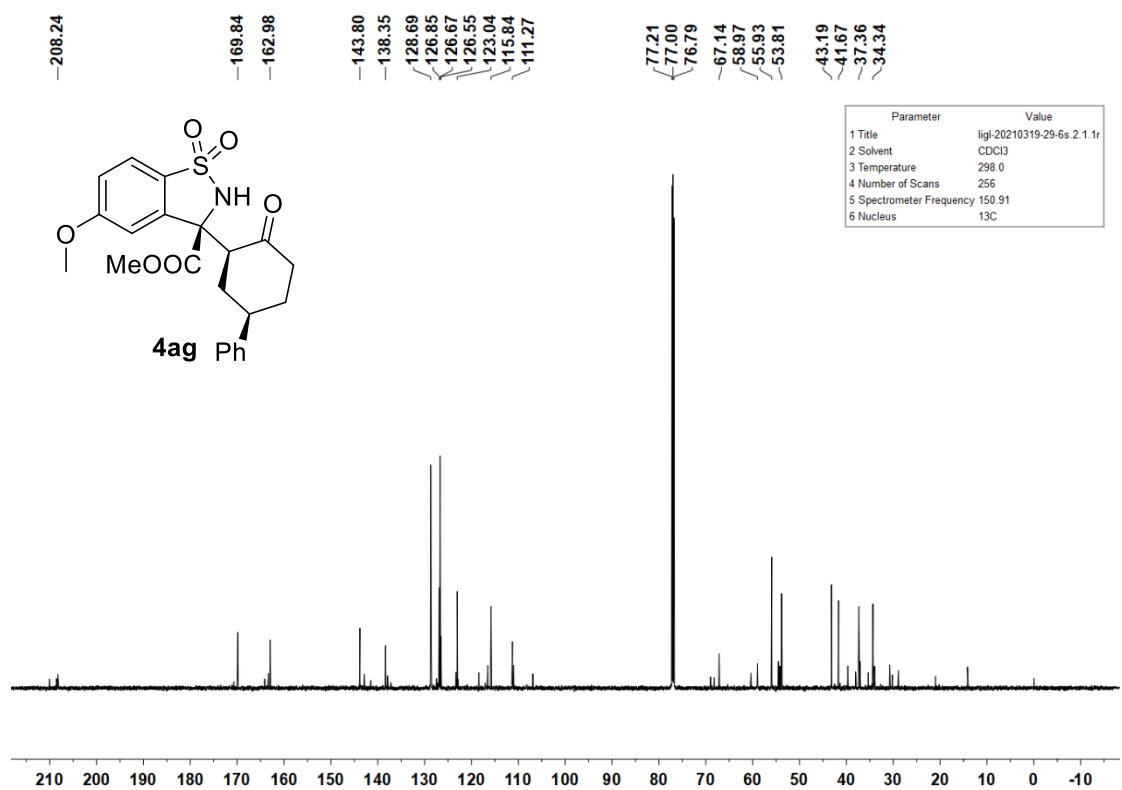

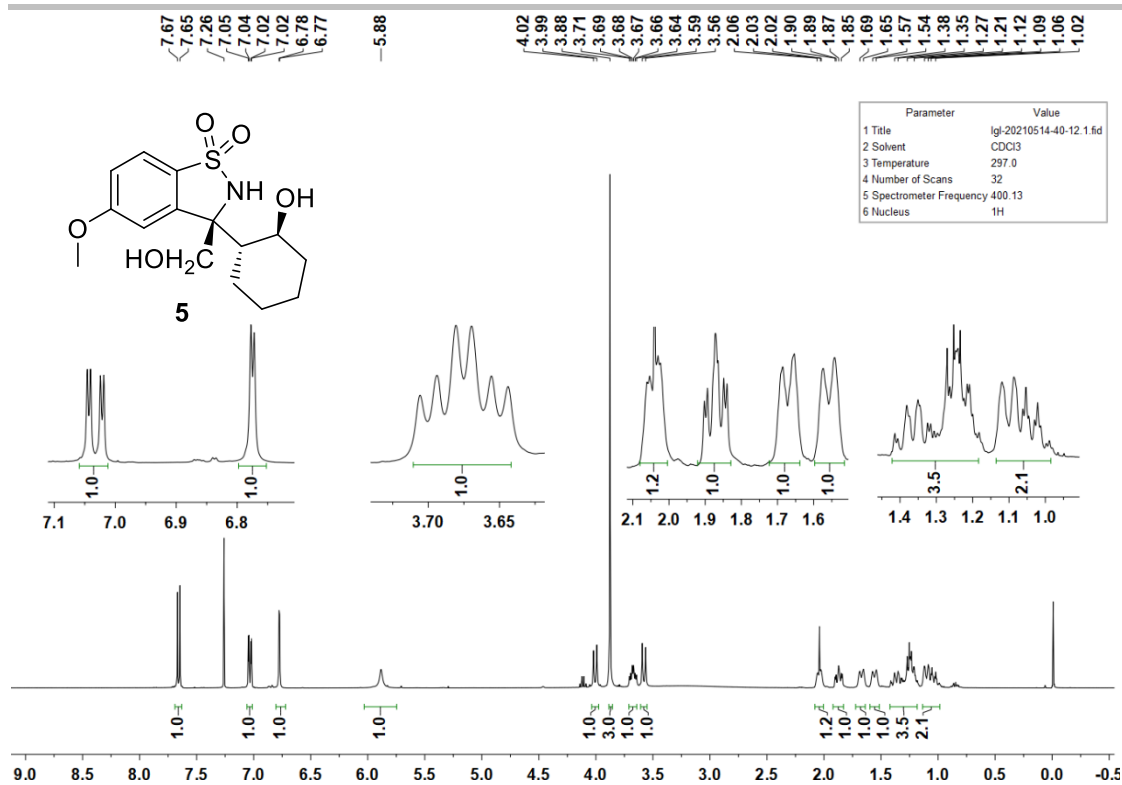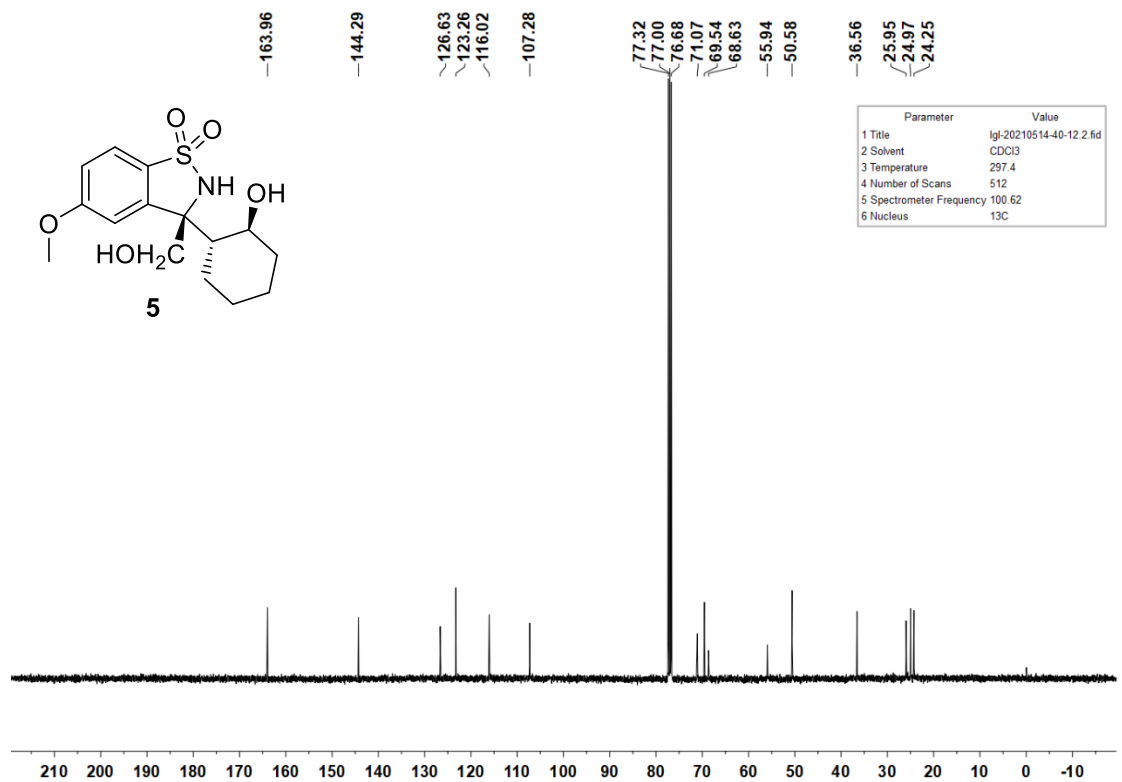

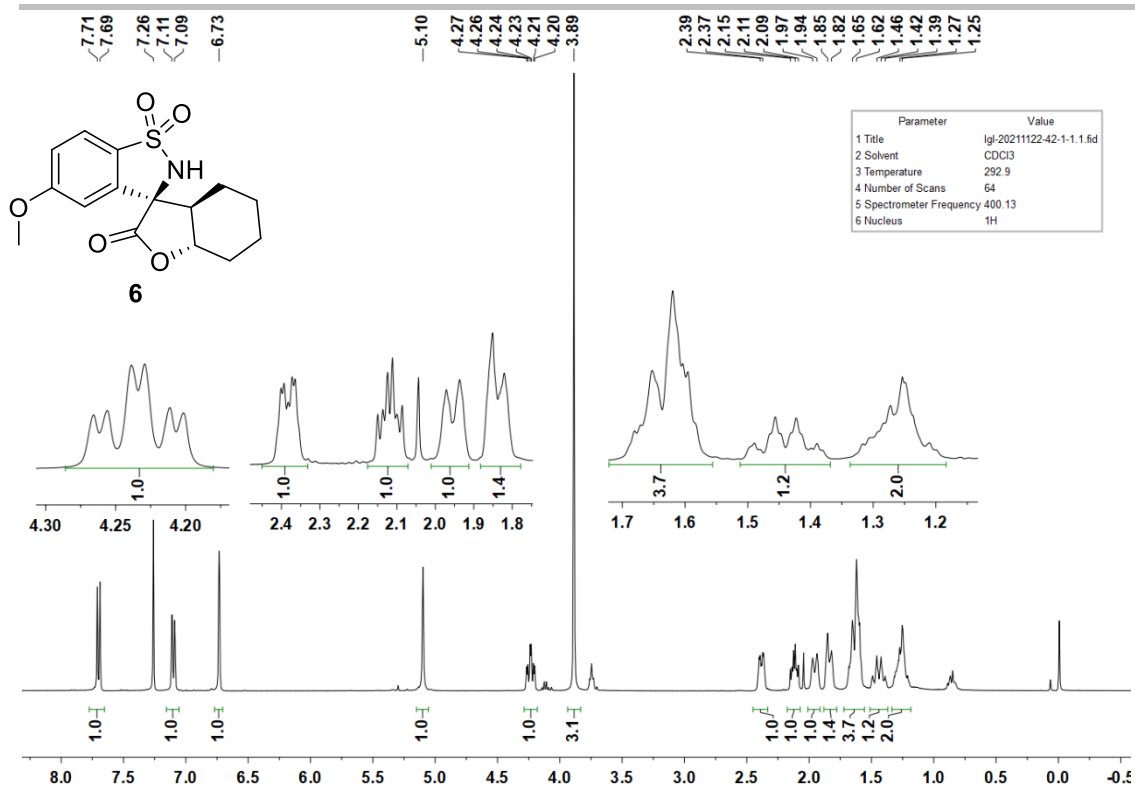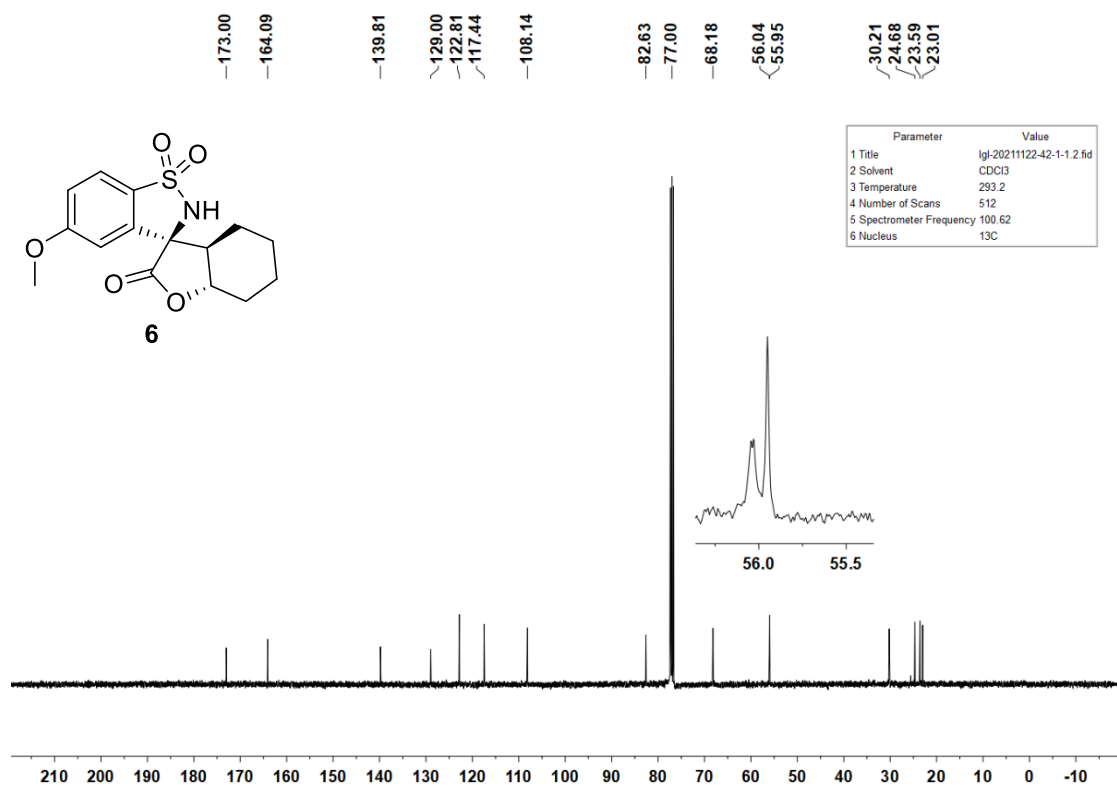

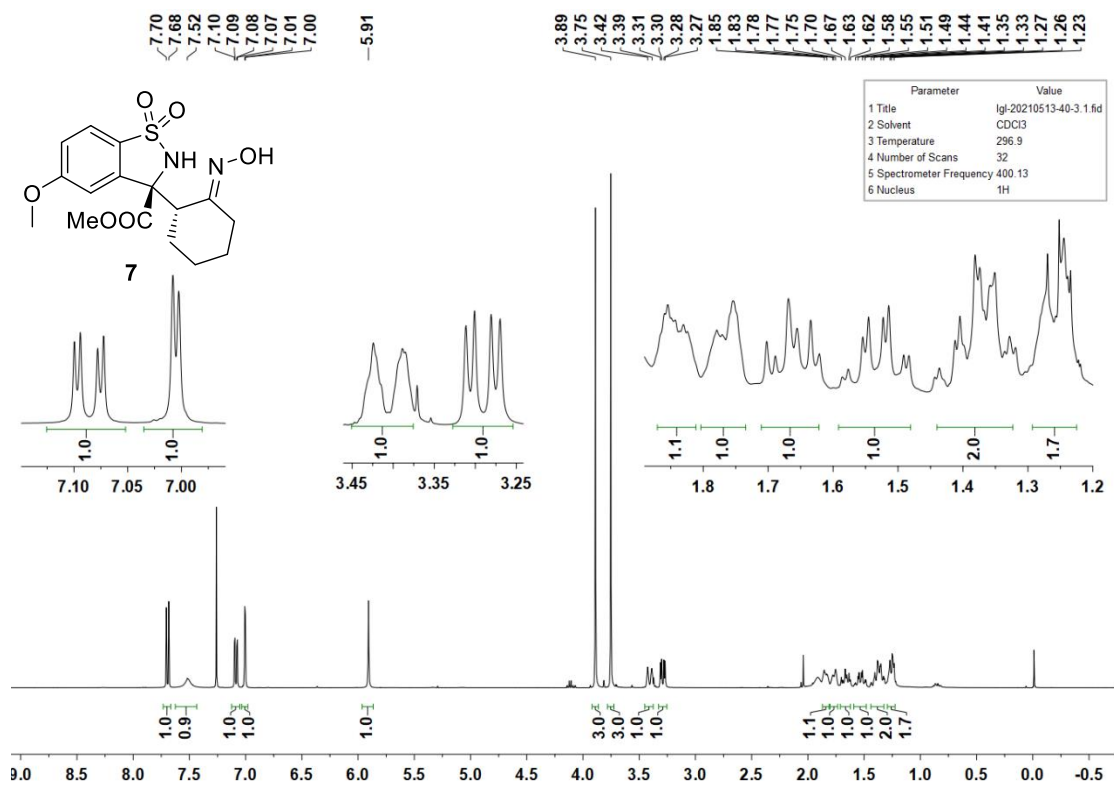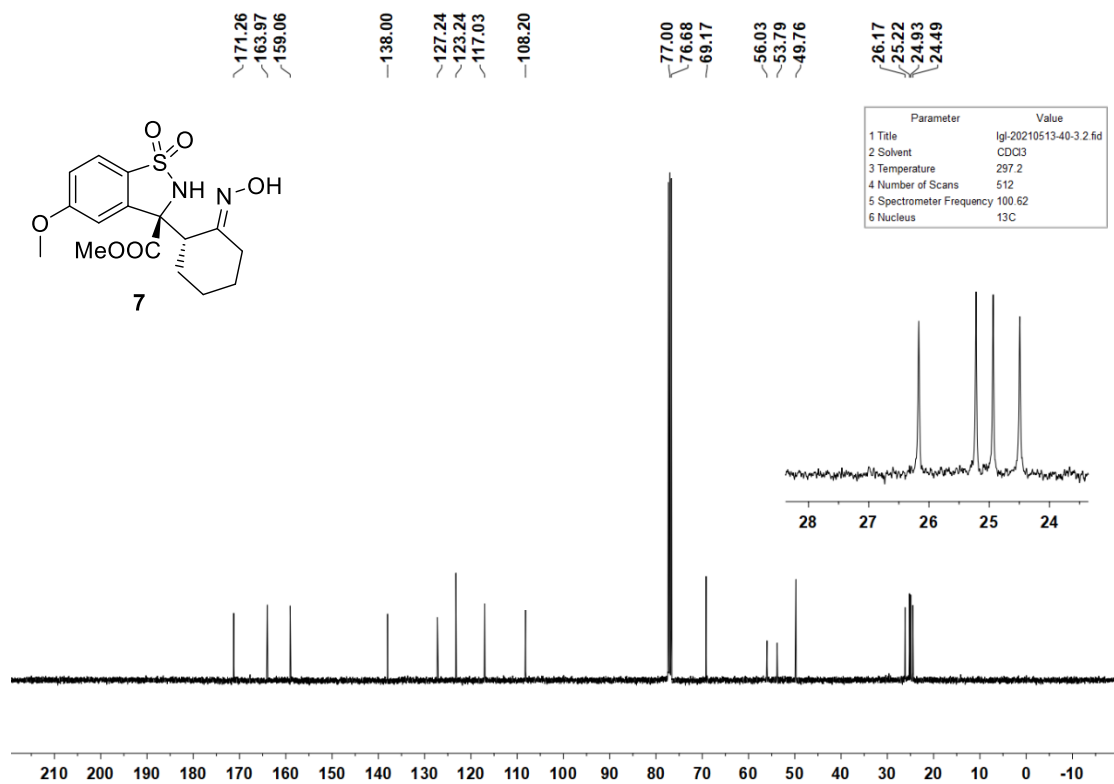



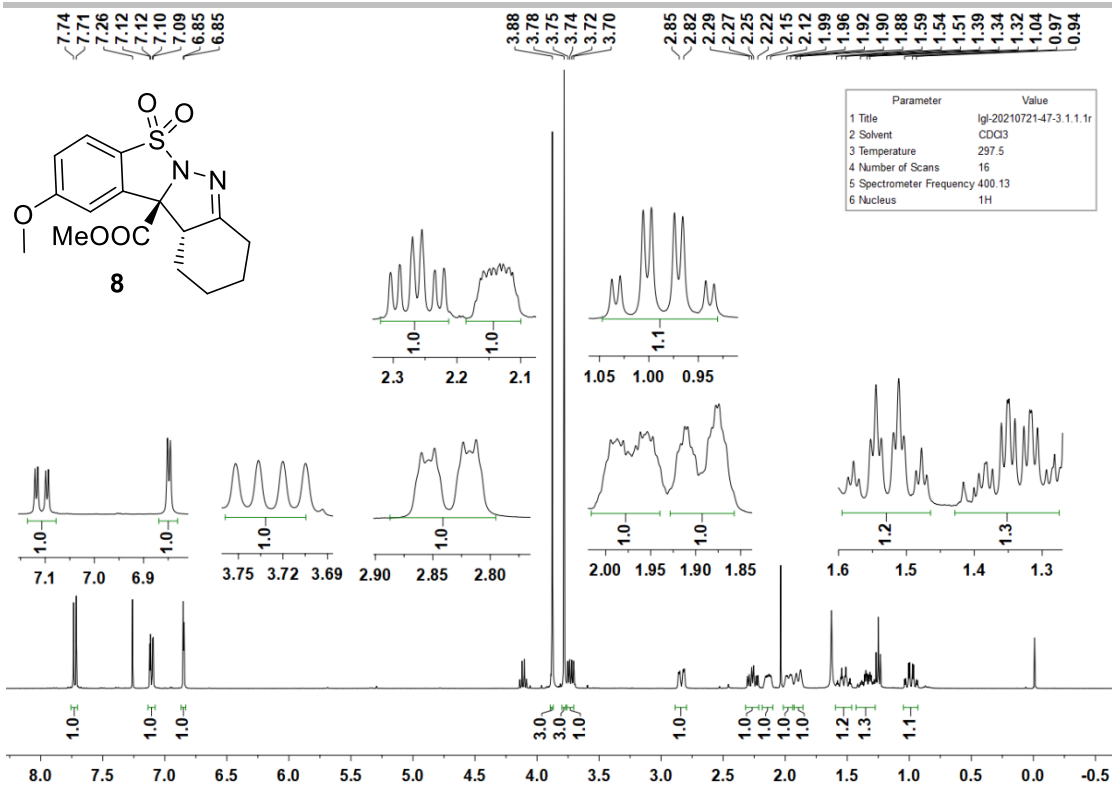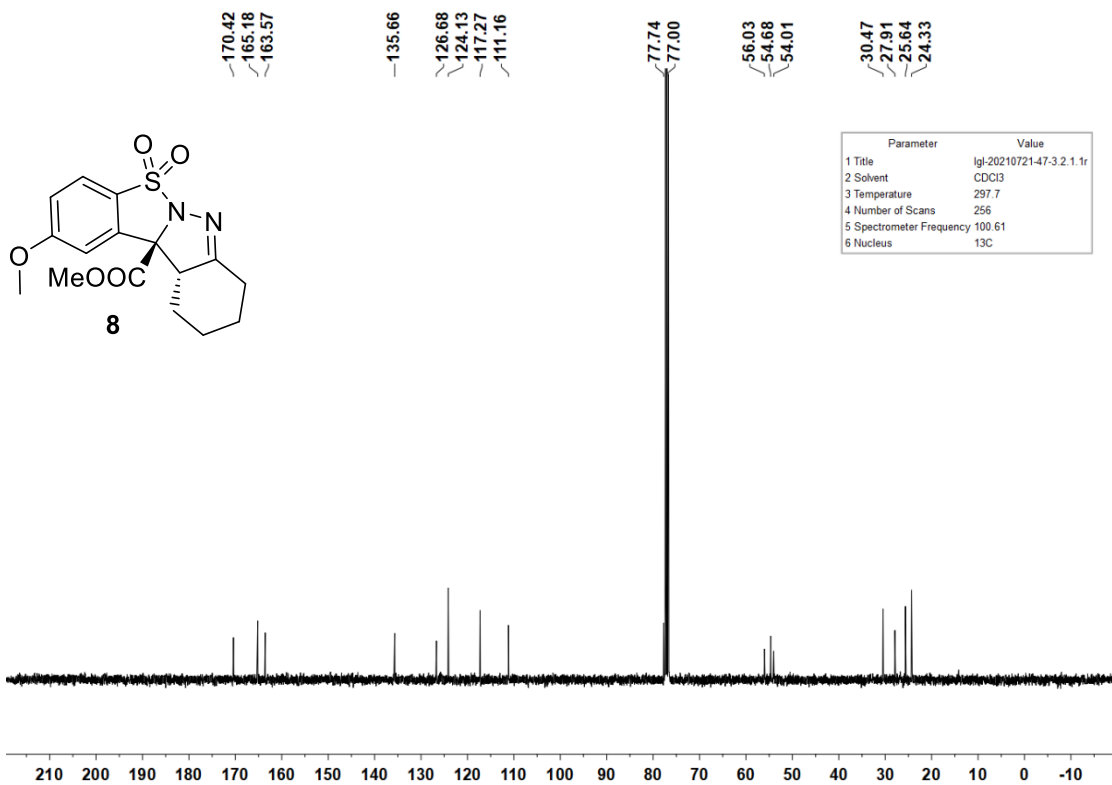

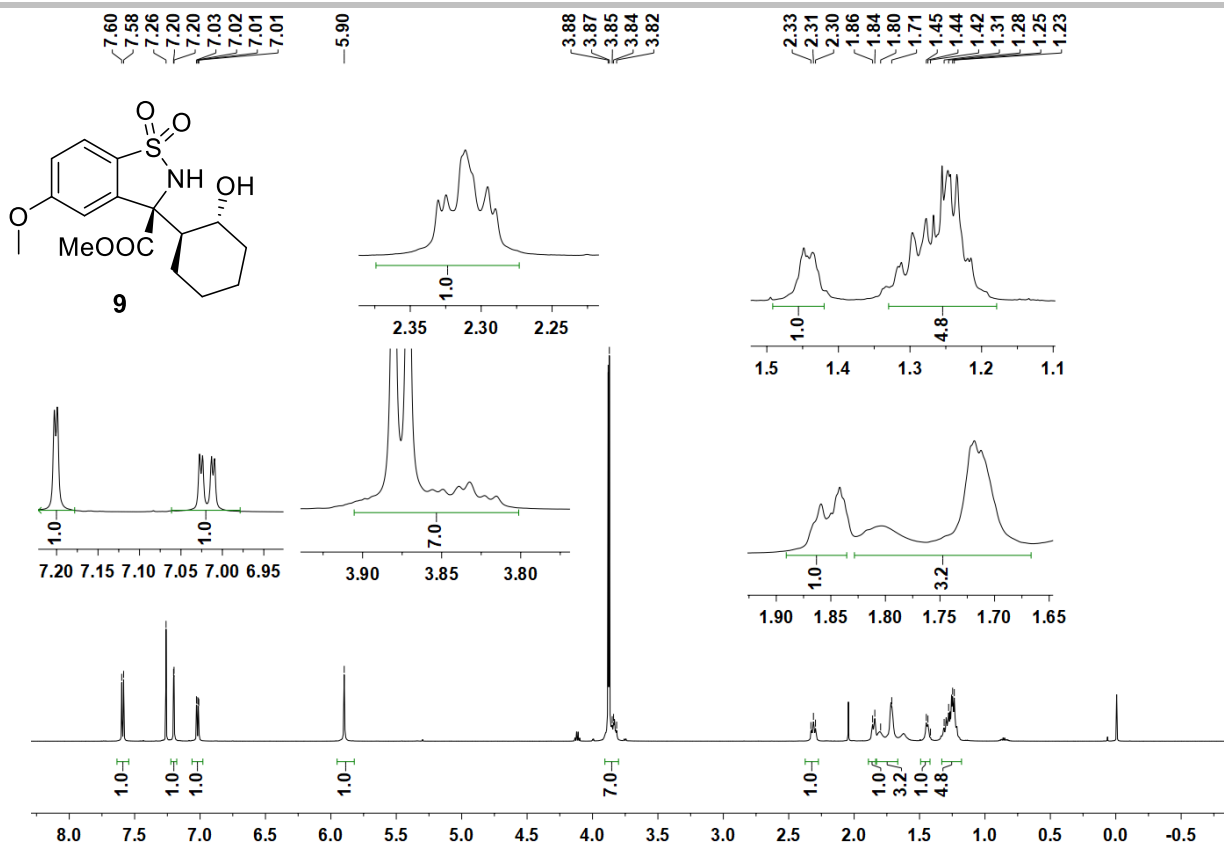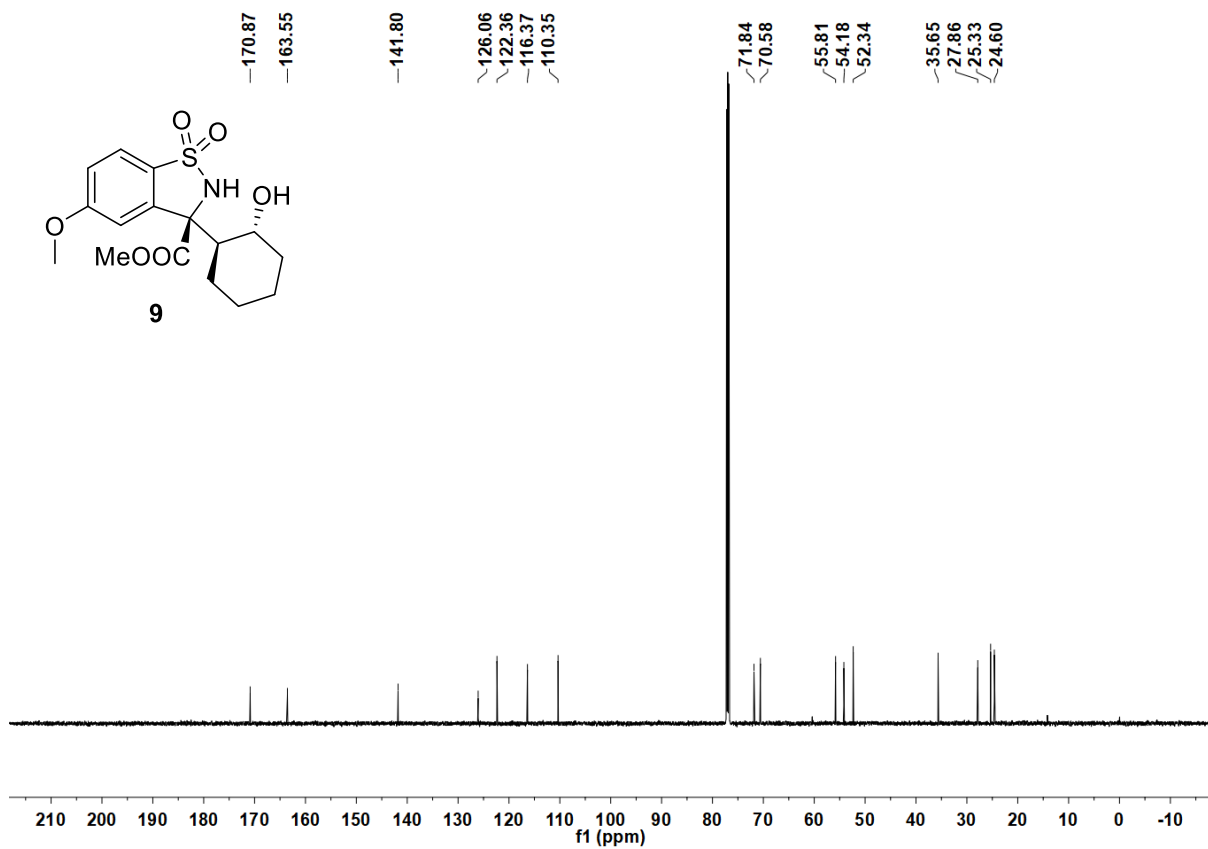

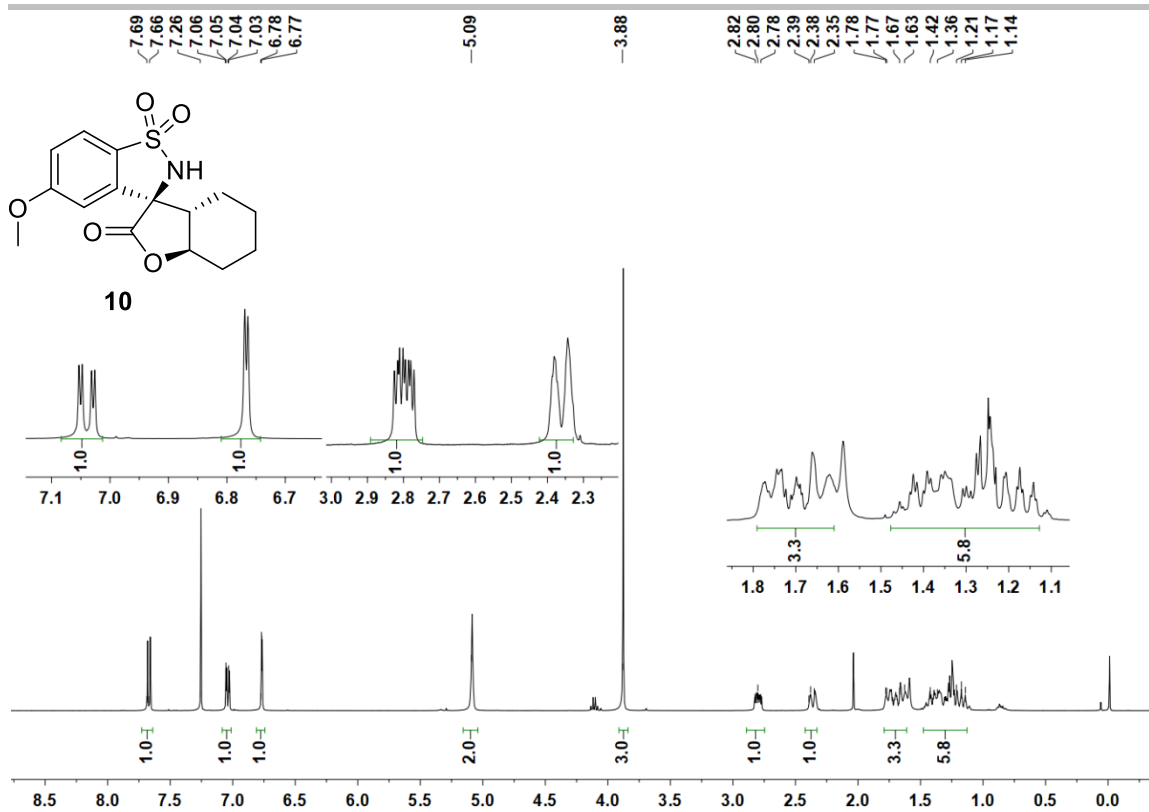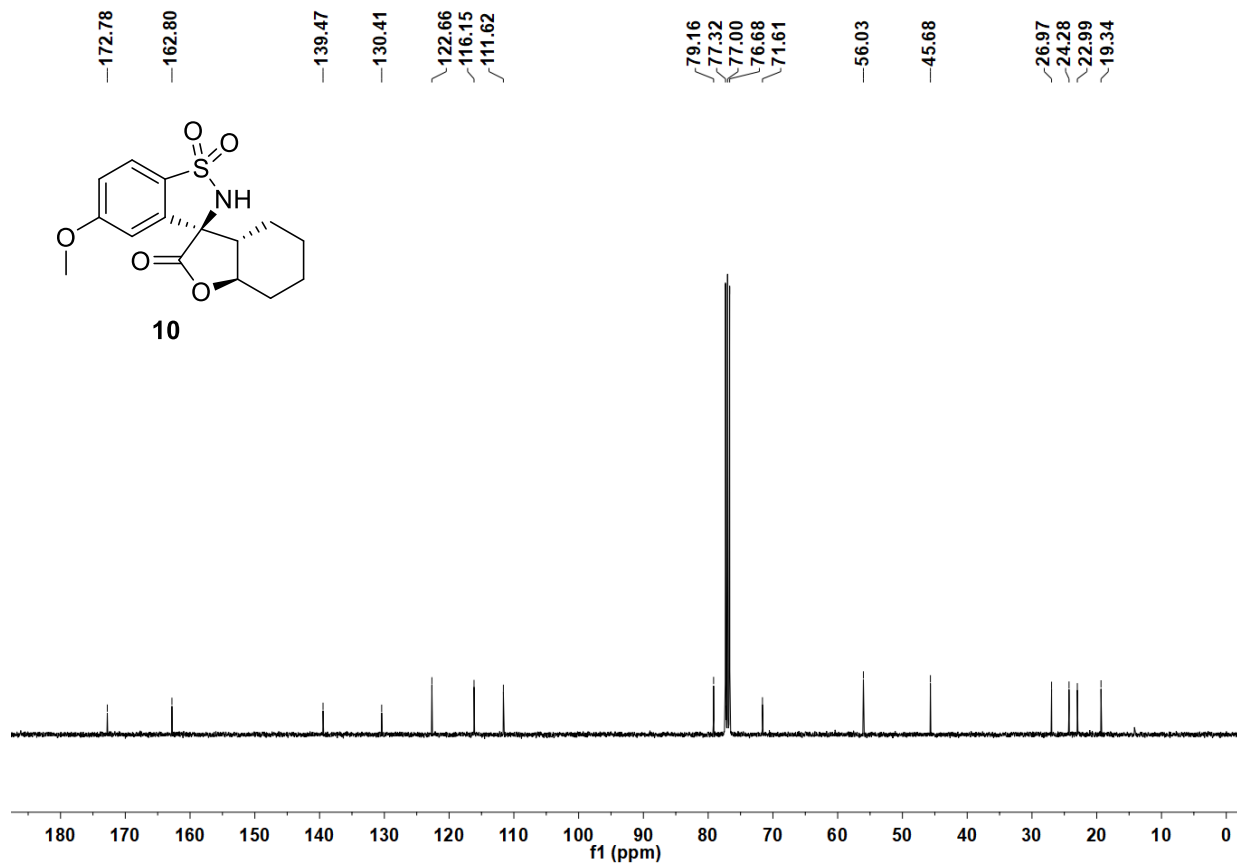

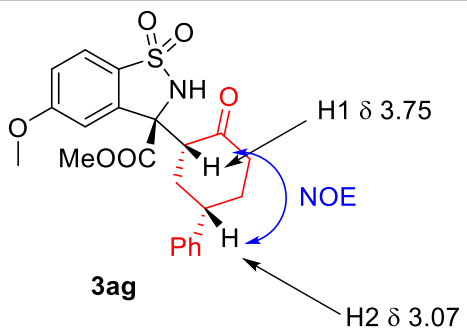

**NOESY NMR of 3ag.**

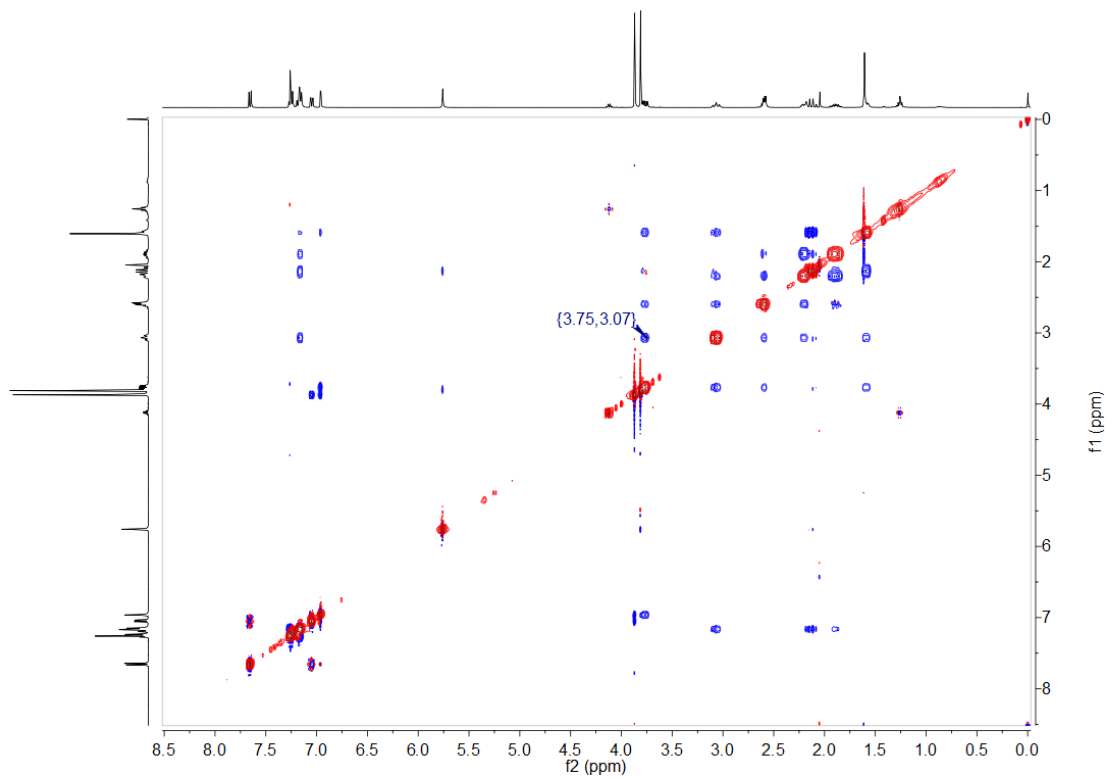

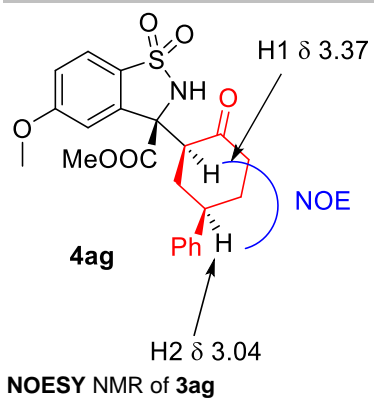

NOESY NMR of **3ag**

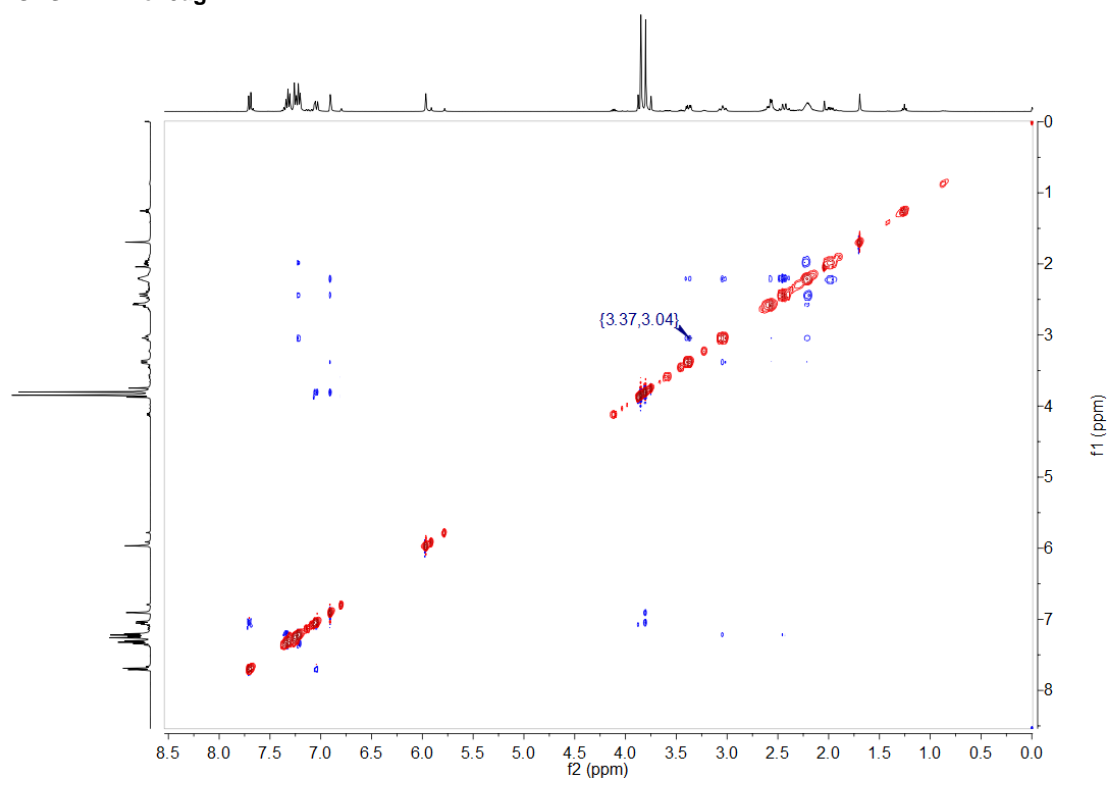

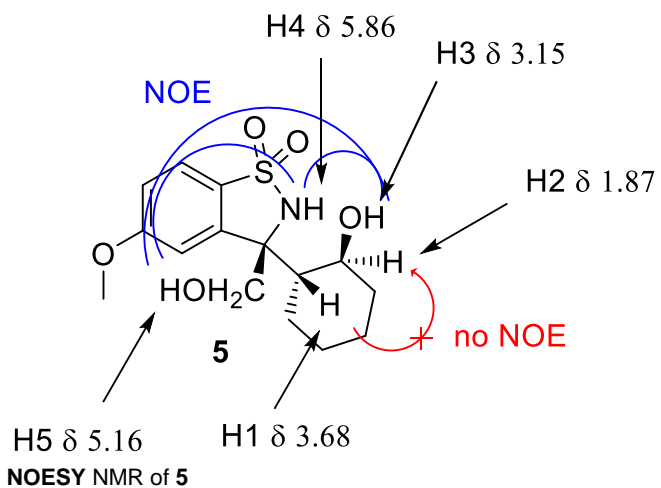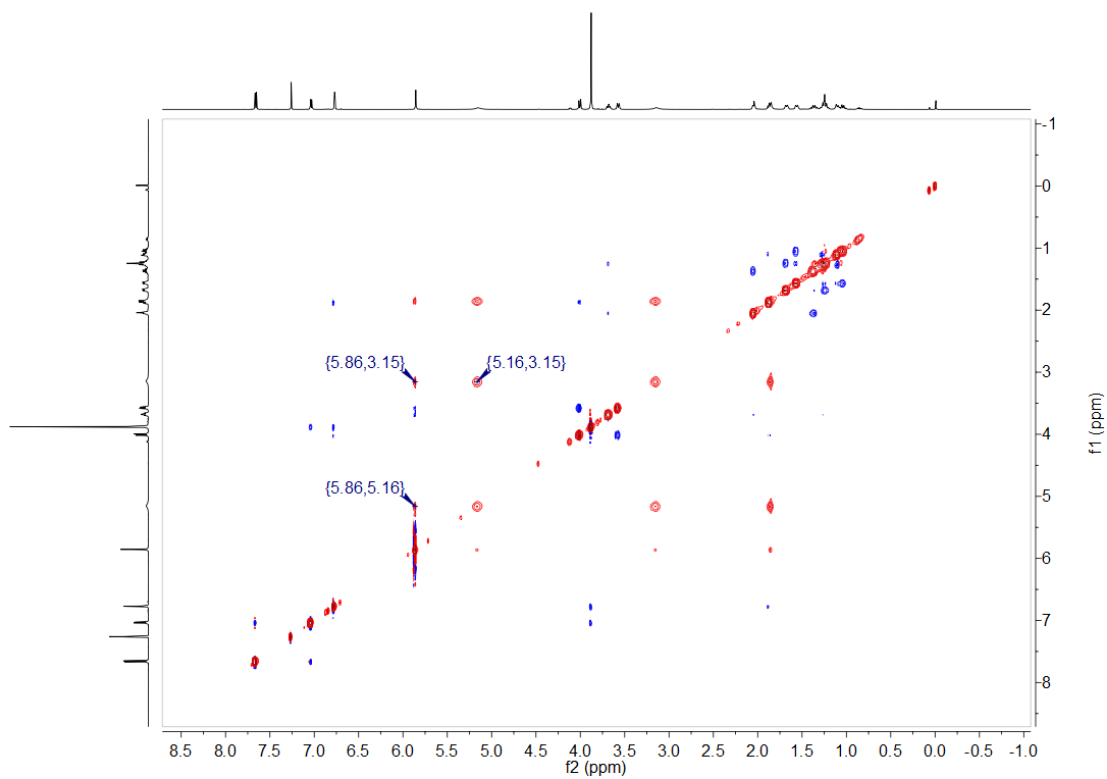

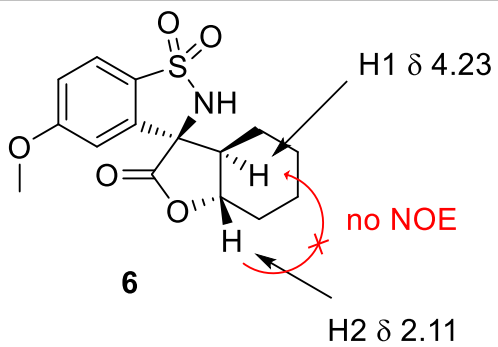

NOESY NMR of **6**

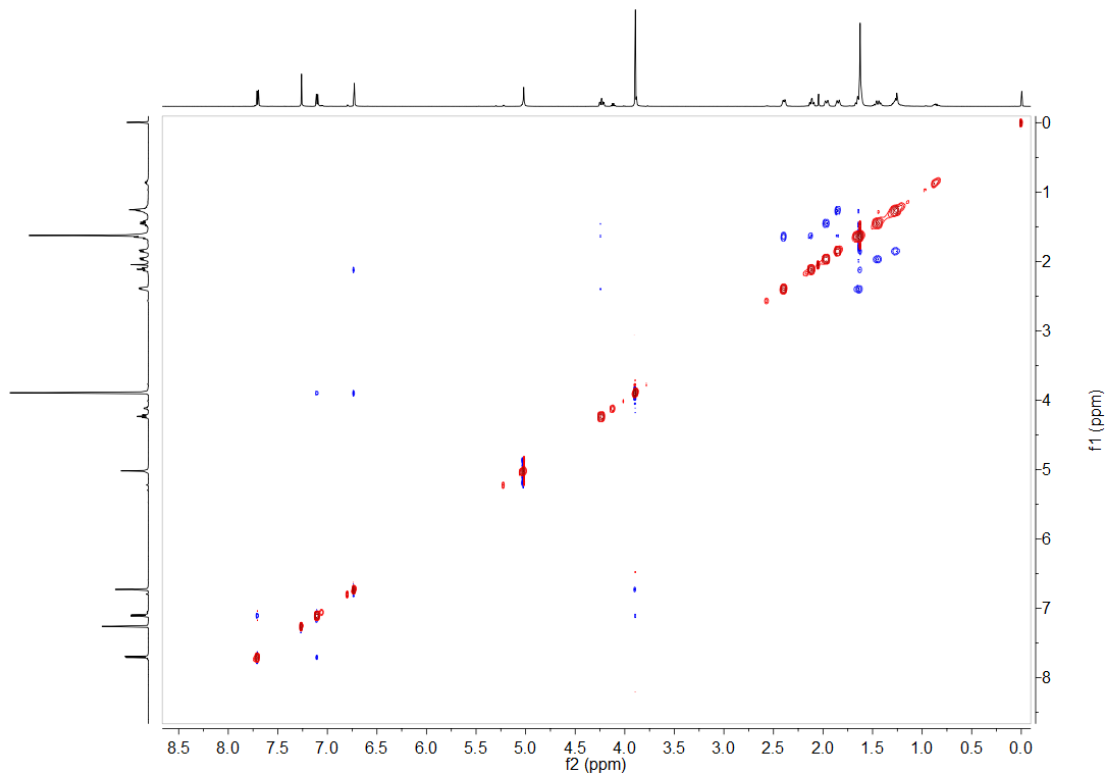

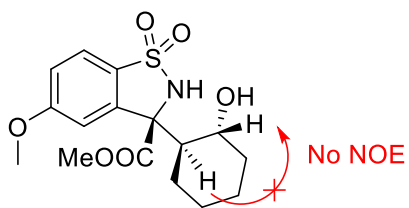

9

NOESY NMR of 9

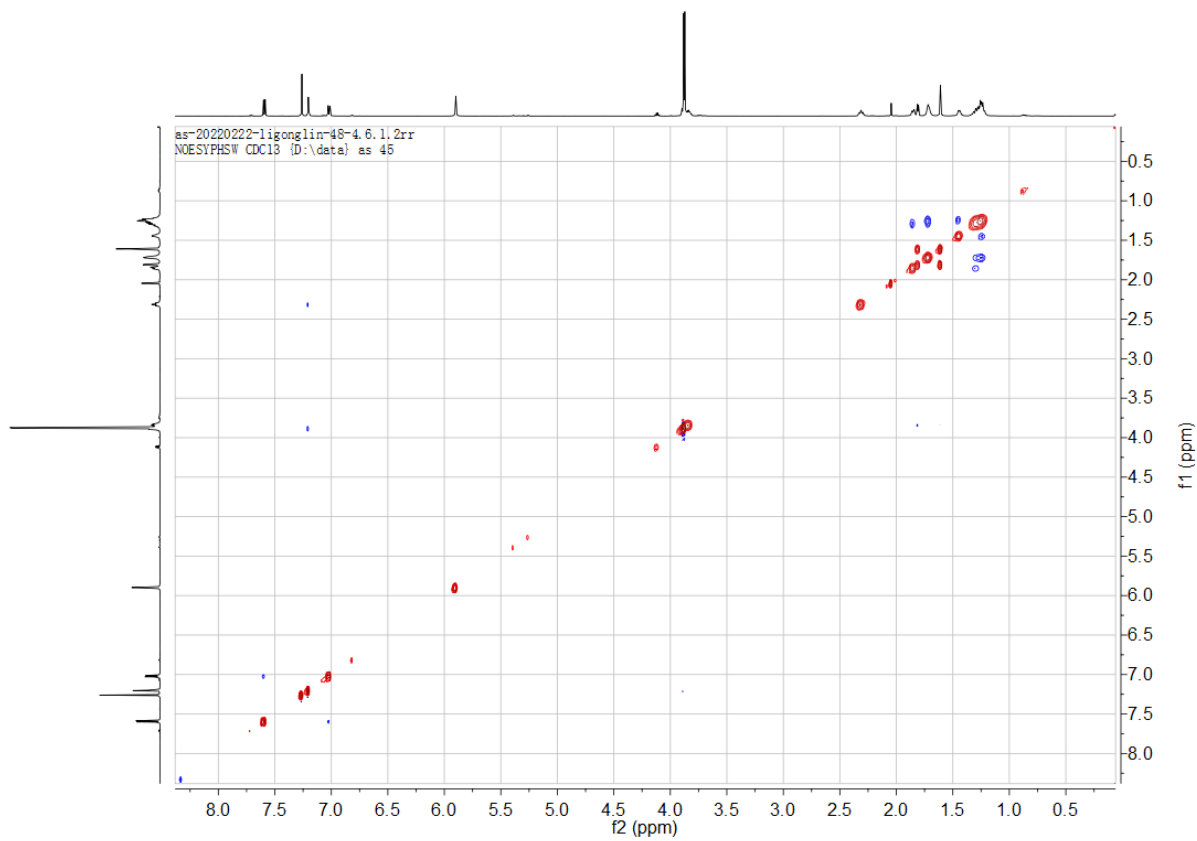



---

## 16. References

- [1] a) J. Liu, Z. G. Yang, Z. Wang, F. Wang, X. H. Chen, X. H. Liu, X. M. Feng, Z. S. Su, C. W. Hu, *J. Am. Chem. Soc.* **2008**, *130*, 5654; b) G. L. Li, M. H. Z. Liu, S. J. Zou, X. M. Feng, L. L. Lin, *Org. Lett.*, 2020, **22**, 8708.
- [2] S. Zhang, L. J. Li, Y. B. Hu, Z. G. Zha, Z. Y. Wang, T.-P. Loh, *Org. Lett.*, 2015, **17**, 1050.
- [3] M. J. Frisch, G. W. Trucks, H. B. Schlegel, G. E. Scuseria, M. A. Robb, J. R. Cheeseman, G. Scalmani, V. Barone, B. Mennucci, G. A. Petersson, H. Nakatsuji, M. Li, X. Caricato, H. P. Hratchian, A. F. Izmaylov, J. Bloino, G. Zheng, J. L. Sonnenberg, M. Hada, M. Ehara, K. Toyota, R. Fukuda, J. Hasegawa, M. Ishida, T. Nakajima, Y. Honda, O. Kitao, H. Nakai, T. Vreven, J. A. Montgomery, J. J. E. Peralta, F. Ogliaro, M. Bearpark, J. J. Heyd, E. Brothers, K. N. Kudin, V. N. Taroverov, T. Keith, R. Kobayashi, J. Normand, K. Raghavachari, A. Rendell, J. C. Burant, S. S. Iyengar, J. Tomasi, M. N. C. Rega, J. M. Millam, M. Klene, J. E. Knox, J. B. Cross, V. Bakken, C. Adamo, J. Jaramillo, R. Gomperts, R. E. Stratmann, O. Yazyev, A. J. Austin, R. Cammi, C. Pomelli, J. W. Ochterski, R. L. Martin, K. Morokuma, V. G. Zakrzewski, G. A. Voth, P. Salvador, J. J. Dannenberg, S.; Dapprich, A. D. Daniels, O. Farkas, J. B. Foresman, J. V. Ortiz, J. Cioslowski, D. J. Fox, Gaussian 09 (Revision D.01) I. Gaussian, Wallingford, CT, 2013.
- [4] A. V. Marenich, C. J. Cramer, D. Truhlar, *J. Phys. Chem. B*, 2009, **113**, 6378.
- [5] S. Grimme, J. Antony, S. Ehrlich, H. Krieg, *J. Chem. Phys.*, 2010, **132**, 154104.
- [6] S. Grimme, S. Ehrlich, L. Goerigk, *J. Comput. Chem.*, 2011, **32**, 1456.
- [7] C. Bannwarth, S. Ehlert, S. Grimme, *J. Chem. Theory Comput.*, 2019, **15**, 1652.
- [8] T. Lu, *Molclus* program, Version 1.9.9.5, <http://www.keinchi.com/research/molclus.html>
- [9] G. M. Sheldrick, *Acta Cryst.*, 2008, **A64**, 112.
- [10] G. M. Sheldrick, *Acta Cryst.*, 2015, **A71**, 3.
- [11] G. M. Sheldrick, *Acta Cryst.*, 2015, **C71**, 3.
- [12] A. L. J. Spek, *Appl. Cryst.*, 2003, **36**, 7.
